# Supplementary material
Source: MDPI journal article supplement (https://www.mdpi.com/2304-6740/6/1/20)
Supplement: s1 [file s1]

## A cryptand-type aluminum tris(salophen) complex:

### Synthesis, characterization, and cell imaging application

#### 1. $^1\text{H}$ -NMR Spectra and HR-ESI MS spectra

##### 1.1 $^1\text{H}$ -NMR Spectra

Unless specially mentioned, the  $^1\text{H}$  NMR spectra were recorded in DMSO- $d_6$  and the peaks for residue solvent (DMSO,  $\delta = 2.50$  ppm), water ( $\delta = 3.33$  ppm) and TMS ( $\delta = 0$  ppm) were omitted for clarity.

**LAl**

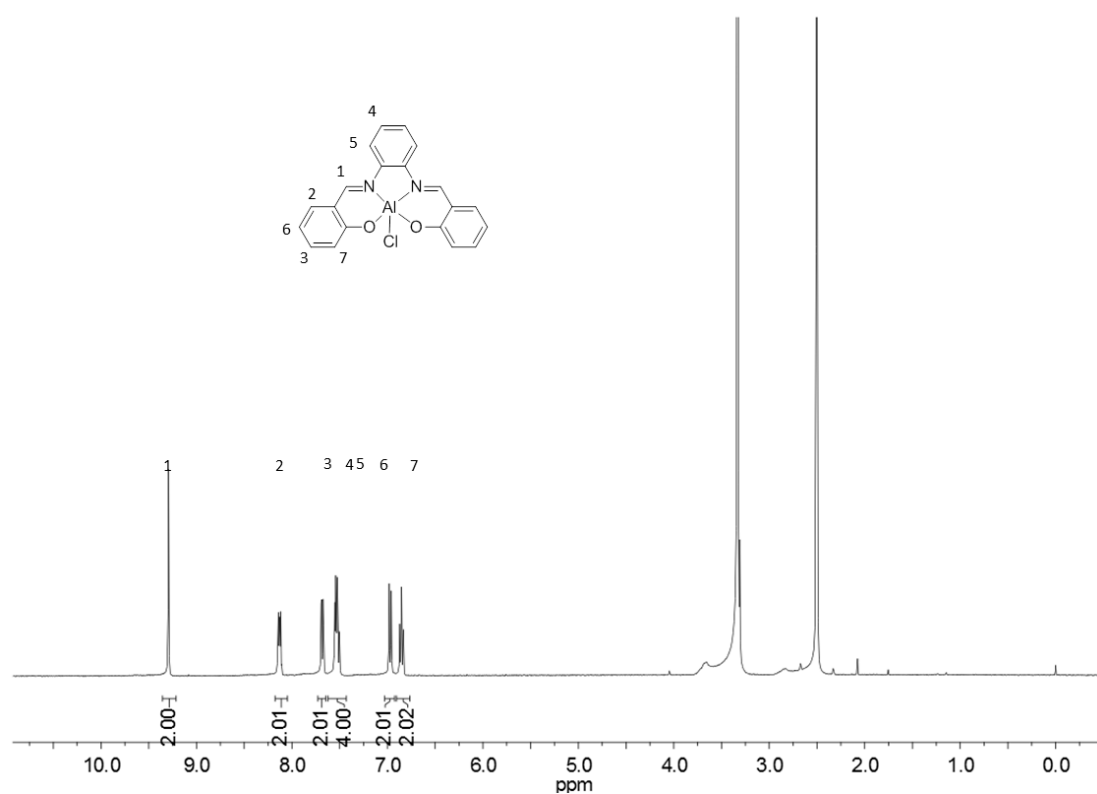

**LAl<sub>3</sub>**

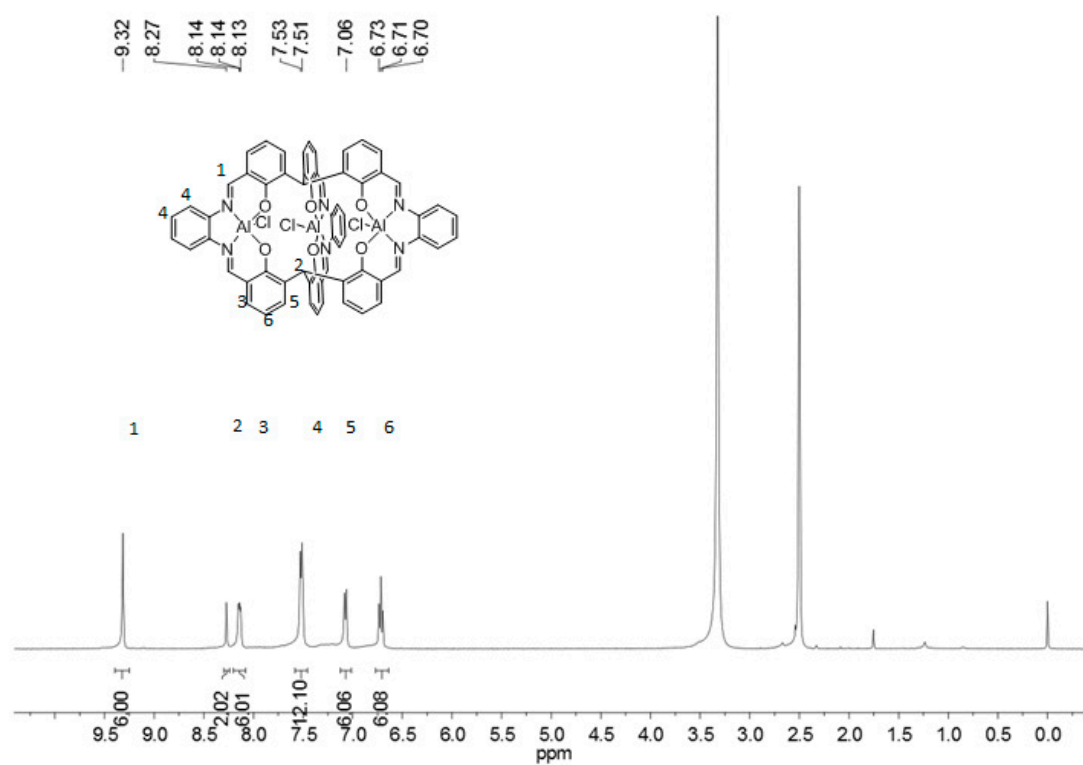

**LAI<sub>3</sub>-F**

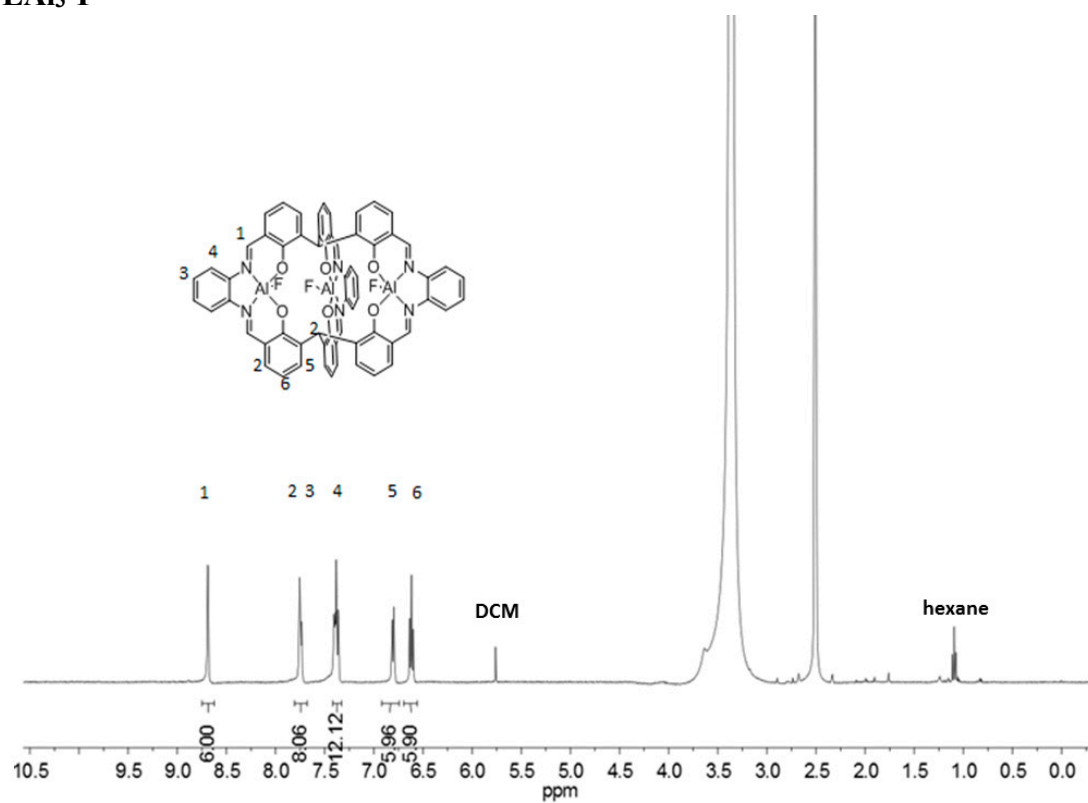

## 1.2 HR-ESI MS Spectra

### LAI

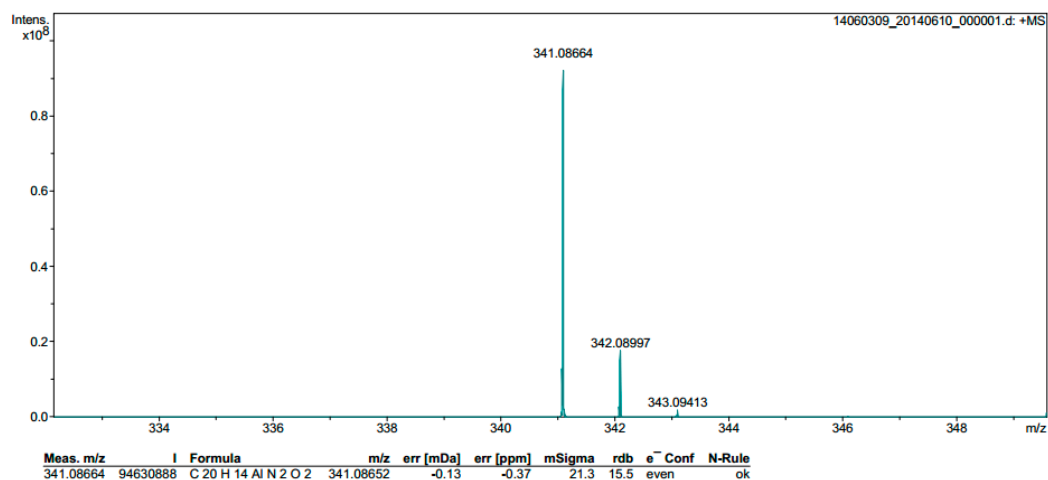

### LAI<sub>3</sub>

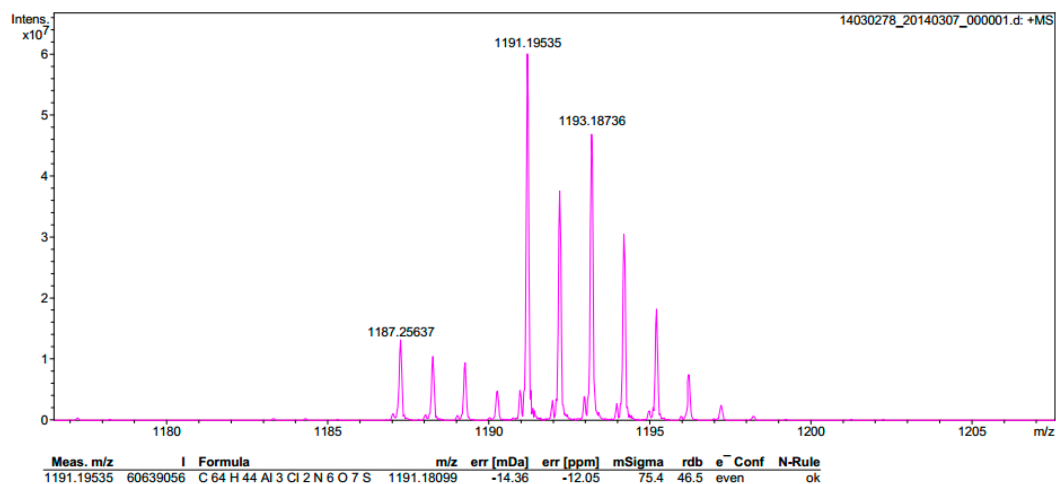

### LAI<sub>3</sub>-F

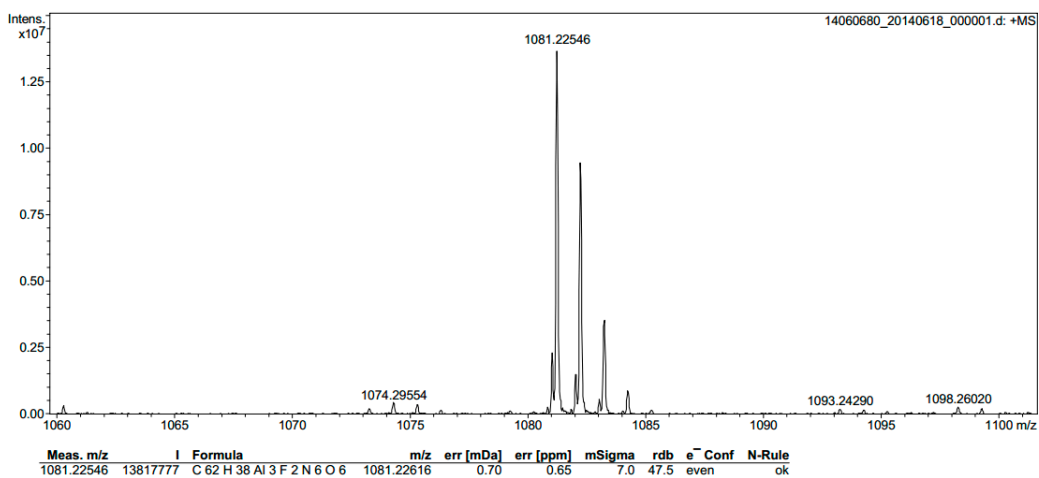

1.3 Table S1. Crystal data and structure refinement parameters

| complex                                          | <b>LAl<sub>3</sub>-F</b>                          |
|--------------------------------------------------|---------------------------------------------------|
| molecular formula                                | C65 H47 Al3 F3 N6 O9                              |
| formula wt. (g mol <sup>-1</sup> )               | 1194.02                                           |
| temperature (K)                                  | 296(2)                                            |
| radiation ( $\lambda$ , Å)                       | 0.71073                                           |
| crystal system                                   | Triclinic                                         |
| space group                                      | <i>P</i> -1                                       |
| <i>a</i> (Å)                                     | 13.060(6)                                         |
| <i>b</i> (Å)                                     | 19.920(10)                                        |
| <i>c</i> (Å)                                     | 21.490(11)                                        |
| $\alpha$ (°)                                     | 65.028(6)                                         |
| $\beta$ (°)                                      | 87.853(7)                                         |
| $\gamma$ (°)                                     | 89.408(7)                                         |
| volume (Å <sup>3</sup> )                         | 5064(4)                                           |
| <i>Z</i>                                         | 2                                                 |
| $\rho_{\text{calcd}}$ (mg m <sup>-3</sup> )      | 0.783                                             |
| $\mu$ (mm <sup>-1</sup> )                        | 0.080                                             |
| F(000)                                           | 1234                                              |
| crystal size (mm <sup>3</sup> )                  | 0.42×0.4× 0.2                                     |
| theta range (°)                                  | 1.834 ~ 24.858                                    |
| reflections collected                            | 26408                                             |
| completeness to theta = 24.86°                   | 97.9%                                             |
| independent reflections                          | 17212 [R(int) = 0.0424]                           |
| goodness-of-fit on F <sup>2</sup>                | 1.014                                             |
| final R indices[R > 2 $\sigma$ (I)]              | R <sub>1</sub> = 0.0556, wR <sub>2</sub> = 0.1471 |
| R indices (all data)                             | R <sub>1</sub> = 0.0991, wR <sub>2</sub> = 0.1635 |
| largest diff. peak and hole (e Å <sup>-3</sup> ) | 0.460 and -0.292                                  |
