# Supplementary material
Source: MDPI journal article supplement (https://www.mdpi.com/2304-6740/6/1/20)
Supplement: s1 [file s1]

# checkCIF/PLATON report

Structure factors have been supplied for datablock(s) 5

THIS REPORT IS FOR GUIDANCE ONLY. IF USED AS PART OF A REVIEW PROCEDURE FOR PUBLICATION, IT SHOULD NOT REPLACE THE EXPERTISE OF AN EXPERIENCED CRYSTALLOGRAPHIC REFEREE.

No syntax errors found.      CIF dictionary      Interpreting this report

## Datablock: 5

---

Bond precision:    C-C = 0.0045 Å                      Wavelength=0.71073

Cell:                a=13.060(6)                b=19.92(1)                c=21.490(11)  
                      alpha=65.028(6)        beta=87.853(7)        gamma=89.408(7)

Temperature:        296 K

|                        | Calculated                          | Reported             |
|------------------------|-------------------------------------|----------------------|
| Volume                 | 5064(4)                             | 5064(4)              |
| Space group            | P -1                                | P -1                 |
| Hall group             | -P 1                                | -P 1                 |
| Moiety formula         | C65 H47 Al3 F3 N6 O9 [+<br>solvent] | ?                    |
| Sum formula            | C65 H47 Al3 F3 N6 O9 [+<br>solvent] | C65 H47 Al3 F3 N6 O9 |
| Mr                     | 1194.03                             | 1194.02              |
| Dx, g cm <sup>-3</sup> | 0.783                               | 0.783                |
| Z                      | 2                                   | 2                    |
| Mu (mm <sup>-1</sup> ) | 0.080                               | 0.080                |
| F000                   | 1234.0                              | 1234.0               |
| F000'                  | 1234.96                             |                      |
| h,k,lmax               | 15,23,25                            | 15,23,25             |
| Nref                   | 17579                               | 17212                |
| Tmin,Tmax              | 0.967,0.984                         | 0.964,0.982          |
| Tmin'                  | 0.967                               |                      |

Correction method= # Reported T Limits: Tmin=0.964 Tmax=0.982  
AbsCorr = MULTI-SCAN

Data completeness= 0.979                      Theta(max)= 24.858

R(reflections)= 0.0556( 9858)                wR2(reflections)= 0.1635( 17212)

S = 1.014                                          Npar= 778

---

The following ALERTS were generated. Each ALERT has the format

**test-name\_ALERT\_alert-type\_alert-level.**

Click on the hyperlinks for more details of the test.

---

 **Alert level B**

PLAT934\_ALERT\_3\_B Number of (Iobs-Icalc)/SigmaW > 10 Outliers .... 6 Check

---

 **Alert level C**

PLAT029\_ALERT\_3\_C \_diffn\_measured\_fraction\_theta\_full value Low . 0.979 Why?  
PLAT230\_ALERT\_2\_C Hirshfeld Test Diff for O9 --C65 . 7.0 s.u.  
PLAT340\_ALERT\_3\_C Low Bond Precision on C-C Bonds ..... 0.00452 Ang.  
PLAT905\_ALERT\_3\_C Negative K value in the Analysis of Variance ... -15.024 Report  
PLAT905\_ALERT\_3\_C Negative K value in the Analysis of Variance ... -0.274 Report  
PLAT911\_ALERT\_3\_C Missing FCF Refl Between Thmin & STh/L= 0.591 361 Report  
PLAT975\_ALERT\_2\_C Check Calcd Resid. Dens. 0.98A From O8 0.42 eA-3  
PLAT975\_ALERT\_2\_C Check Calcd Resid. Dens. 1.01A From O9 0.41 eA-3

---

 **Alert level G**

PLAT066\_ALERT\_1\_G Predicted and Reported Tmin&Tmax Range Identical ? Check  
PLAT606\_ALERT\_4\_G VERY LARGE Solvent Accessible VOID(S) in Structure ! Info  
PLAT869\_ALERT\_4\_G ALERTS Related to the Use of SQUEEZE Suppressed ! Info  
PLAT910\_ALERT\_3\_G Missing # of FCF Reflection(s) Below Theta(Min). 4 Note  
PLAT913\_ALERT\_3\_G Missing # of Very Strong Reflections in FCF .... 3 Note  
PLAT978\_ALERT\_2\_G Number C-C Bonds with Positive Residual Density. 5 Info

---

0 **ALERT level A** = Most likely a serious problem - resolve or explain  
1 **ALERT level B** = A potentially serious problem, consider carefully  
8 **ALERT level C** = Check. Ensure it is not caused by an omission or oversight  
6 **ALERT level G** = General information/check it is not something unexpected

1 ALERT type 1 CIF construction/syntax error, inconsistent or missing data  
4 ALERT type 2 Indicator that the structure model may be wrong or deficient  
8 ALERT type 3 Indicator that the structure quality may be low  
2 ALERT type 4 Improvement, methodology, query or suggestion  
0 ALERT type 5 Informative message, check

---

---

It is advisable to attempt to resolve as many as possible of the alerts in all categories. Often the minor alerts point to easily fixed oversights, errors and omissions in your CIF or refinement strategy, so attention to these fine details can be worthwhile. In order to resolve some of the more serious problems it may be necessary to carry out additional measurements or structure refinements. However, the purpose of your study may justify the reported deviations and the more serious of these should normally be commented upon in the discussion or experimental section of a paper or in the "special\_details" fields of the CIF. checkCIF was carefully designed to identify outliers and unusual parameters, but every test has its limitations and alerts that are not important in a particular case may appear. Conversely, the absence of alerts does not guarantee there are no aspects of the results needing attention. It is up to the individual to critically assess their own results and, if necessary, seek expert advice.

### **Publication of your CIF in IUCr journals**

A basic structural check has been run on your CIF. These basic checks will be run on all CIFs submitted for publication in IUCr journals (*Acta Crystallographica*, *Journal of Applied Crystallography*, *Journal of Synchrotron Radiation*); however, if you intend to submit to *Acta Crystallographica Section C* or *E* or *IUCrData*, you should make sure that full publication checks are run on the final version of your CIF prior to submission.

### **Publication of your CIF in other journals**

Please refer to the *Notes for Authors* of the relevant journal for any special instructions relating to CIF submission.
