# Supplementary material
Source: MDPI journal article supplement (https://www.mdpi.com/2304-6740/6/1/20)
Supplement: s1 [file s1]

Archive with 4 entries (3 files):
- supplementary materials.pdf
- cif & cifchecked files/
- cif & cifchecked files/5.cif
- cif & cifchecked files/checkcif.pdf
