# Supplementary material
Source: MDPI journal article supplement (https://www.mdpi.com/2304-6740/6/1/20)
Supplement: s1 [file s1 › cif & cifchecked files/5.cif]

 
data_5
 
_audit_creation_method            'SHELXL-2014/7'
_shelx_SHELXL_version_number      '2014/7'
_chemical_name_systematic         ?
_chemical_name_common             ?
_chemical_melting_point           ?
_chemical_formula_moiety          ?
_chemical_formula_sum
 'C65 H47 Al3 F3 N6 O9' 
_chemical_formula_weight          1194.02

loop_
 _atom_type_symbol
 _atom_type_description
 _atom_type_scat_dispersion_real
 _atom_type_scat_dispersion_imag
 _atom_type_scat_source
 'C'  'C'   0.0033   0.0016
 'International Tables Vol C Tables 4.2.6.8 and 6.1.1.4'
 'H'  'H'   0.0000   0.0000
 'International Tables Vol C Tables 4.2.6.8 and 6.1.1.4'
 'N'  'N'   0.0061   0.0033
 'International Tables Vol C Tables 4.2.6.8 and 6.1.1.4'
 'O'  'O'   0.0106   0.0060
 'International Tables Vol C Tables 4.2.6.8 and 6.1.1.4'
 'Al'  'Al'   0.0645   0.0514
 'International Tables Vol C Tables 4.2.6.8 and 6.1.1.4'
 'F'  'F'   0.0171   0.0103
 'International Tables Vol C Tables 4.2.6.8 and 6.1.1.4'
 
_space_group_crystal_system       triclinic
_space_group_IT_number            2
_space_group_name_H-M_alt         'P -1'
_space_group_name_Hall            '-P 1'
 
_shelx_space_group_comment
;
The symmetry employed for this shelxl refinement is uniquely defined
by the following loop, which should always be used as a source of
symmetry information in preference to the above space-group names.
They are only intended as comments.
;
 
loop_
 _space_group_symop_operation_xyz
 'x, y, z'
 '-x, -y, -z'
 
_cell_length_a                    13.060(6)
_cell_length_b                    19.920(10)
_cell_length_c                    21.490(11)
_cell_angle_alpha                 65.028(6)
_cell_angle_beta                  87.853(7)
_cell_angle_gamma                 89.408(7)
_cell_volume                      5064(4)
_cell_formula_units_Z             2
_cell_measurement_temperature     296(2)
_cell_measurement_reflns_used     4690  
_cell_measurement_theta_min       2.26  
_cell_measurement_theta_max       24.36 
 
_exptl_crystal_description        'block'
_exptl_crystal_colour             'yellow'
_exptl_crystal_density_meas       ?
_exptl_crystal_density_method     ?
_exptl_crystal_density_diffrn     0.783          
_exptl_crystal_F_000              1234
_exptl_transmission_factor_min    ?
_exptl_transmission_factor_max    ?
_exptl_crystal_size_max           0.42
_exptl_crystal_size_mid           0.4
_exptl_crystal_size_min           0.2
_exptl_absorpt_coefficient_mu     0.080
_shelx_estimated_absorpt_T_min    ?
_shelx_estimated_absorpt_T_max    ?
_exptl_absorpt_correction_type    multi-scan 
_exptl_absorpt_correction_T_min   0.9635 
_exptl_absorpt_correction_T_max   0.9824 
_exptl_absorpt_process_details    SADABS 
_exptl_absorpt_special_details    ?
_diffrn_ambient_temperature       296(2)
_diffrn_radiation_wavelength      0.71073
_diffrn_radiation_type            MoK\a
_diffrn_source                    ?
_diffrn_measurement_device_type   'Bruker APEX-II CCD' 
_diffrn_measurement_method        ?
_diffrn_detector_area_resol_mean  ?
_diffrn_reflns_number             26408
_diffrn_reflns_av_unetI/netI      0.0978
_diffrn_reflns_av_R_equivalents   0.0424
_diffrn_reflns_limit_h_min        -15
_diffrn_reflns_limit_h_max        8
_diffrn_reflns_limit_k_min        -22
_diffrn_reflns_limit_k_max        23
_diffrn_reflns_limit_l_min        -25
_diffrn_reflns_limit_l_max        24
_diffrn_reflns_theta_min          1.834
_diffrn_reflns_theta_max          24.858
_diffrn_reflns_theta_full         24.858
_diffrn_measured_fraction_theta_max   0.979
_diffrn_measured_fraction_theta_full  0.979
_diffrn_reflns_Laue_measured_fraction_max    0.979
_diffrn_reflns_Laue_measured_fraction_full   0.979
_diffrn_reflns_point_group_measured_fraction_max   0.979
_diffrn_reflns_point_group_measured_fraction_full  0.979
_reflns_number_total              17212
_reflns_number_gt                 9858
_reflns_threshold_expression      'I > 2\s(I)'
_reflns_Friedel_coverage          0.000
_reflns_Friedel_fraction_max      .
_reflns_Friedel_fraction_full     .
 
_reflns_special_details
;
 Reflections were merged by SHELXL according to the crystal
 class for the calculation of statistics and refinement.
 
 Structure factors included contributions from the .fab file.
 
 _reflns_Friedel_fraction is defined as the number of unique
 Friedel pairs measured divided by the number that would be
 possible theoretically, ignoring centric projections and
 systematic absences.
;
 
_computing_data_collection        ?
_computing_cell_refinement        ?
_computing_data_reduction         ?
_computing_structure_solution     ?
_computing_structure_refinement 'SHELXL-2014/7 (Sheldrick, 2014)'
_computing_molecular_graphics     ?
_computing_publication_material   ?
_refine_special_details           ?
_refine_ls_structure_factor_coef  Fsqd
_refine_ls_matrix_type            full
_refine_ls_weighting_scheme       calc
_refine_ls_weighting_details
'w=1/[\s^2^(Fo^2^)+(0.0770P)^2^] where P=(Fo^2^+2Fc^2^)/3'
_atom_sites_solution_primary      ?
_atom_sites_solution_secondary    ?
_atom_sites_solution_hydrogens    geom
_refine_ls_hydrogen_treatment     constr
_refine_ls_extinction_method      none
_refine_ls_extinction_coef        .
_refine_ls_number_reflns          17212
_refine_ls_number_parameters      778
_refine_ls_number_restraints      0
_refine_ls_R_factor_all           0.0991
_refine_ls_R_factor_gt            0.0556
_refine_ls_wR_factor_ref          0.1635
_refine_ls_wR_factor_gt           0.1471
_refine_ls_goodness_of_fit_ref    1.014
_refine_ls_restrained_S_all       1.014
_refine_ls_shift/su_max           0.000
_refine_ls_shift/su_mean          0.000
 
loop_
 _atom_site_label
 _atom_site_type_symbol
 _atom_site_fract_x
 _atom_site_fract_y
 _atom_site_fract_z
 _atom_site_U_iso_or_equiv
 _atom_site_adp_type
 _atom_site_occupancy
 _atom_site_site_symmetry_order  
 _atom_site_calc_flag
 _atom_site_refinement_flags_posn
 _atom_site_refinement_flags_adp
 _atom_site_refinement_flags_occupancy
 _atom_site_disorder_assembly
 _atom_site_disorder_group
Al1 Al 0.30254(7) 0.94970(5) 0.13990(5) 0.0280(2) Uani 1 1 d . . . . .
Al2 Al 0.21406(6) 0.90321(5) 0.44586(5) 0.0256(2) Uani 1 1 d . . . . .
Al3 Al 0.33112(7) 0.63533(5) 0.38055(5) 0.0266(2) Uani 1 1 d . . . . .
F1 F 0.33312(12) 0.88908(10) 0.10197(9) 0.0341(4) Uani 1 1 d . . . . .
F2 F 0.19428(12) 0.99750(9) 0.39477(9) 0.0295(4) Uani 1 1 d . . . . .
F3 F 0.30374(12) 0.59915(9) 0.46936(9) 0.0313(4) Uani 1 1 d . . . . .
O1 O 0.40277(14) 0.91723(11) 0.20309(10) 0.0270(5) Uani 1 1 d . . . . .
O2 O 0.19350(14) 0.89480(11) 0.19079(10) 0.0285(5) Uani 1 1 d . . . . .
O3 O 0.33938(14) 0.90052(11) 0.40593(10) 0.0249(5) Uani 1 1 d . . . . .
O4 O 0.13371(14) 0.87104(11) 0.39650(10) 0.0255(5) Uani 1 1 d . . . . .
O5 O 0.41667(14) 0.70928(11) 0.37691(10) 0.0261(5) Uani 1 1 d . . . . .
O6 O 0.21162(14) 0.68649(11) 0.35777(11) 0.0282(5) Uani 1 1 d . . . . .
O7 O 0.26781(15) 1.02674(12) 0.17544(11) 0.0333(5) Uani 1 1 d . . . . .
O8 O 0.23656(14) 0.79644(11) 0.51233(11) 0.0287(5) Uani 1 1 d . . . . .
O9 O 0.36528(15) 0.66679(11) 0.27951(11) 0.0304(5) Uani 1 1 d . . . . .
N1 N 0.39752(18) 1.02759(14) 0.07193(13) 0.0293(6) Uani 1 1 d . . . . .
N2 N 0.20763(18) 1.00850(14) 0.06313(13) 0.0305(6) Uani 1 1 d . . . . .
N3 N 0.28026(18) 0.92882(14) 0.51670(13) 0.0268(6) Uani 1 1 d . . . . .
N4 N 0.09303(17) 0.89709(14) 0.51001(12) 0.0248(6) Uani 1 1 d . . . . .
N5 N 0.45059(18) 0.56549(14) 0.39628(13) 0.0268(6) Uani 1 1 d . . . . .
N6 N 0.26478(18) 0.54659(14) 0.37417(13) 0.0291(6) Uani 1 1 d . . . . .
C1 C 0.4774(2) 0.95703(16) 0.21133(16) 0.0250(7) Uani 1 1 d . . . . .
C2 C 0.5159(2) 1.02361(17) 0.15678(16) 0.0287(8) Uani 1 1 d . . . . .
C3 C 0.5956(2) 1.06394(19) 0.16787(18) 0.0369(8) Uani 1 1 d . . . . .
H3 H 0.6209 1.1066 0.1316 0.044 Uiso 1 1 calc R U . . .
C4 C 0.6365(2) 1.04137(18) 0.23123(17) 0.0336(8) Uani 1 1 d . . . . .
H4 H 0.6870 1.0692 0.2390 0.040 Uiso 1 1 calc R U . . .
C5 C 0.6000(2) 0.97501(17) 0.28413(17) 0.0293(8) Uani 1 1 d . . . . .
H5 H 0.6287 0.9593 0.3269 0.035 Uiso 1 1 calc R U . . .
C6 C 0.5240(2) 0.93159(16) 0.27640(16) 0.0249(7) Uani 1 1 d . . . . .
C7 C 0.4783(2) 1.05235(18) 0.08883(18) 0.0346(8) Uani 1 1 d . . . . .
H7 H 0.5142 1.0914 0.0545 0.042 Uiso 1 1 calc R U . . .
C8 C 0.3634(2) 1.05929(17) 0.00342(16) 0.0291(8) Uani 1 1 d . . . . .
C9 C 0.4244(2) 1.09557(18) -0.05552(17) 0.0344(8) Uani 1 1 d . . . . .
H9 H 0.4943 1.1017 -0.0526 0.041 Uiso 1 1 calc R U . . .
C10 C 0.3798(2) 1.12243(19) -0.11859(17) 0.0370(9) Uani 1 1 d . . . . .
H10 H 0.4200 1.1469 -0.1584 0.044 Uiso 1 1 calc R U . . .
C11 C 0.2759(3) 1.1133(2) -0.12326(17) 0.0416(9) Uani 1 1 d . . . . .
H11 H 0.2468 1.1323 -0.1661 0.050 Uiso 1 1 calc R U . . .
C12 C 0.2147(2) 1.07620(19) -0.06454(17) 0.0379(9) Uani 1 1 d . . . . .
H12 H 0.1451 1.0697 -0.0678 0.045 Uiso 1 1 calc R U . . .
C13 C 0.2588(2) 1.04909(18) -0.00120(16) 0.0323(8) Uani 1 1 d . . . . .
C14 C 0.1106(2) 1.01785(19) 0.07298(17) 0.0345(8) Uani 1 1 d . . . . .
H14 H 0.0750 1.0522 0.0366 0.041 Uiso 1 1 calc R U . . .
C15 C 0.0561(2) 0.97821(18) 0.13664(16) 0.0287(8) Uani 1 1 d . . . . .
C16 C 0.0979(2) 0.91714(17) 0.19222(16) 0.0265(7) Uani 1 1 d . . . . .
C17 C 0.0352(2) 0.87761(16) 0.25204(15) 0.0243(7) Uani 1 1 d . . . . .
C18 C -0.0635(2) 0.90258(17) 0.25514(16) 0.0265(7) Uani 1 1 d . . . . .
H18 H -0.1041 0.8774 0.2946 0.032 Uiso 1 1 calc R U . . .
C19 C -0.1049(2) 0.96395(18) 0.20161(17) 0.0325(8) Uani 1 1 d . . . . .
H19 H -0.1711 0.9797 0.2058 0.039 Uiso 1 1 calc R U . . .
C20 C -0.0456(2) 1.00059(18) 0.14262(17) 0.0349(8) Uani 1 1 d . . . . .
H20 H -0.0728 1.0407 0.1061 0.042 Uiso 1 1 calc R U . . .
C21 C 0.0771(2) 0.80738(16) 0.30806(15) 0.0239(7) Uani 1 1 d . . . . .
H21 H 0.1496 0.8159 0.3126 0.029 Uiso 1 1 calc R U . . .
C22 C 0.0218(2) 0.79033(16) 0.37696(15) 0.0223(7) Uani 1 1 d . . . . .
C23 C -0.0623(2) 0.74359(17) 0.39838(16) 0.0282(7) Uani 1 1 d . . . . .
H23 H -0.0799 0.7176 0.3731 0.034 Uiso 1 1 calc R U . . .
C24 C -0.1223(2) 0.73411(18) 0.45745(16) 0.0326(8) Uani 1 1 d . . . . .
H24 H -0.1788 0.7025 0.4708 0.039 Uiso 1 1 calc R U . . .
C25 C -0.0964(2) 0.77189(17) 0.49480(16) 0.0294(8) Uani 1 1 d . . . . .
H25 H -0.1369 0.7669 0.5331 0.035 Uiso 1 1 calc R U . . .
C26 C -0.0087(2) 0.81882(17) 0.47616(15) 0.0258(7) Uani 1 1 d . . . . .
C27 C 0.0521(2) 0.82789(16) 0.41643(15) 0.0233(7) Uani 1 1 d . . . . .
C28 C 0.0125(2) 0.85735(17) 0.51690(15) 0.0259(7) Uani 1 1 d . . . . .
H28 H -0.0356 0.8536 0.5513 0.031 Uiso 1 1 calc R U . . .
C29 C 0.1080(2) 0.93451(16) 0.55212(15) 0.0262(7) Uani 1 1 d . . . . .
C30 C 0.2112(2) 0.95209(17) 0.55581(15) 0.0257(7) Uani 1 1 d . . . . .
C31 C 0.2365(2) 0.99023(17) 0.59400(17) 0.0319(8) Uani 1 1 d . . . . .
H31 H 0.3044 1.0031 0.5954 0.038 Uiso 1 1 calc R U . . .
C32 C 0.1604(2) 1.00917(18) 0.63007(16) 0.0328(8) Uani 1 1 d . . . . .
H32 H 0.1775 1.0339 0.6566 0.039 Uiso 1 1 calc R U . . .
C33 C 0.0584(2) 0.99147(17) 0.62704(16) 0.0312(8) Uani 1 1 d . . . . .
H33 H 0.0077 1.0046 0.6513 0.037 Uiso 1 1 calc R U . . .
C34 C 0.0325(2) 0.95469(17) 0.58843(15) 0.0289(8) Uani 1 1 d . . . . .
H34 H -0.0358 0.9431 0.5865 0.035 Uiso 1 1 calc R U . . .
C35 C 0.3770(2) 0.91871(17) 0.53043(16) 0.0277(7) Uani 1 1 d . . . . .
H35 H 0.3998 0.9291 0.5659 0.033 Uiso 1 1 calc R U . . .
C36 C 0.4507(2) 0.89271(17) 0.49472(16) 0.0262(7) Uani 1 1 d . . . . .
C37 C 0.5489(2) 0.87625(17) 0.52327(16) 0.0277(7) Uani 1 1 d . . . . .
H37 H 0.5626 0.8843 0.5618 0.033 Uiso 1 1 calc R U . . .
C38 C 0.6236(2) 0.84861(16) 0.49434(16) 0.0262(7) Uani 1 1 d . . . . .
H38 H 0.6875 0.8364 0.5137 0.031 Uiso 1 1 calc R U . . .
C39 C 0.6027(2) 0.83896(16) 0.43554(15) 0.0259(7) Uani 1 1 d . . . . .
H39 H 0.6535 0.8194 0.4166 0.031 Uiso 1 1 calc R U . . .
C40 C 0.5086(2) 0.85746(16) 0.40380(15) 0.0233(7) Uani 1 1 d . . . . .
C41 C 0.4297(2) 0.88396(16) 0.43485(16) 0.0244(7) Uani 1 1 d . . . . .
C42 C 0.4937(2) 0.85675(16) 0.33389(15) 0.0235(7) Uani 1 1 d . . . . .
H42 H 0.4209 0.8481 0.3302 0.028 Uiso 1 1 calc R U . . .
C43 C 0.5549(2) 0.79408(16) 0.32778(15) 0.0225(7) Uani 1 1 d . . . . .
C44 C 0.6548(2) 0.80568(17) 0.30138(15) 0.0261(7) Uani 1 1 d . . . . .
H44 H 0.6814 0.8536 0.2829 0.031 Uiso 1 1 calc R U . . .
C45 C 0.7174(2) 0.74823(18) 0.30133(16) 0.0296(8) Uani 1 1 d . . . . .
H45 H 0.7840 0.7582 0.2828 0.036 Uiso 1 1 calc R U . . .
C46 C 0.6800(2) 0.67776(17) 0.32857(16) 0.0284(8) Uani 1 1 d . . . . .
H46 H 0.7223 0.6392 0.3302 0.034 Uiso 1 1 calc R U . . .
C47 C 0.5781(2) 0.66244(17) 0.35439(16) 0.0270(7) Uani 1 1 d . . . . .
C48 C 0.5129(2) 0.72172(17) 0.35360(15) 0.0256(7) Uani 1 1 d . . . . .
C49 C 0.5449(2) 0.58749(17) 0.38004(16) 0.0277(7) Uani 1 1 d . . . . .
H49 H 0.5944 0.5517 0.3856 0.033 Uiso 1 1 calc R U . . .
C50 C 0.4231(2) 0.49035(17) 0.41781(15) 0.0266(7) Uani 1 1 d . . . . .
C51 C 0.4862(2) 0.42955(17) 0.44991(16) 0.0290(8) Uani 1 1 d . . . . .
H51 H 0.5518 0.4361 0.4618 0.035 Uiso 1 1 calc R U . . .
C52 C 0.4500(2) 0.35882(18) 0.46401(17) 0.0364(9) Uani 1 1 d . . . . .
H52 H 0.4917 0.3179 0.4855 0.044 Uiso 1 1 calc R U . . .
C53 C 0.3518(2) 0.34930(18) 0.44601(17) 0.0358(8) Uani 1 1 d . . . . .
H53 H 0.3295 0.3022 0.4537 0.043 Uiso 1 1 calc R U . . .
C54 C 0.2871(2) 0.40889(17) 0.41683(17) 0.0325(8) Uani 1 1 d . . . . .
H54 H 0.2207 0.4017 0.4066 0.039 Uiso 1 1 calc R U . . .
C55 C 0.3218(2) 0.47994(17) 0.40286(16) 0.0273(7) Uani 1 1 d . . . . .
C56 C 0.1836(2) 0.55068(18) 0.33982(17) 0.0324(8) Uani 1 1 d . . . . .
H56 H 0.1640 0.5087 0.3346 0.039 Uiso 1 1 calc R U . . .
C57 C 0.1222(2) 0.61598(18) 0.30930(17) 0.0313(8) Uani 1 1 d . . . . .
C58 C 0.1380(2) 0.68070(17) 0.32002(16) 0.0266(7) Uani 1 1 d . . . . .
C59 C 0.0701(2) 0.74205(17) 0.28913(16) 0.0260(7) Uani 1 1 d . . . . .
C60 C -0.0055(2) 0.73696(18) 0.24790(17) 0.0317(8) Uani 1 1 d . . . . .
H60 H -0.0479 0.7774 0.2264 0.038 Uiso 1 1 calc R U . . .
C61 C -0.0204(2) 0.67277(19) 0.23737(18) 0.0386(9) Uani 1 1 d . . . . .
H61 H -0.0719 0.6708 0.2095 0.046 Uiso 1 1 calc R U . . .
C62 C 0.0420(2) 0.61330(19) 0.26870(18) 0.0376(9) Uani 1 1 d . . . . .
H62 H 0.0312 0.5702 0.2630 0.045 Uiso 1 1 calc R U . . .
C63 C 0.2404(3) 1.0096(2) 0.24683(17) 0.0428(9) Uani 1 1 d . . . . .
H63A H 0.1702 0.9935 0.2564 0.064 Uiso 1 1 calc R U . . .
H63B H 0.2491 1.0531 0.2549 0.064 Uiso 1 1 calc R U . . .
H63C H 0.2838 0.9710 0.2763 0.064 Uiso 1 1 calc R U . . .
C64 C 0.2622(3) 0.73700(18) 0.49202(18) 0.0393(9) Uani 1 1 d . . . . .
H64A H 0.2006 0.7117 0.4908 0.059 Uiso 1 1 calc R U . . .
H64B H 0.3072 0.7027 0.5246 0.059 Uiso 1 1 calc R U . . .
H64C H 0.2956 0.7574 0.4473 0.059 Uiso 1 1 calc R U . . .
C65 C 0.3568(3) 0.74157(19) 0.22709(18) 0.0411(9) Uani 1 1 d . . . . .
H65A H 0.3037 0.7435 0.1967 0.062 Uiso 1 1 calc R U . . .
H65B H 0.4208 0.7565 0.2015 0.062 Uiso 1 1 calc R U . . .
H65C H 0.3404 0.7744 0.2483 0.062 Uiso 1 1 calc R U . . .
 
loop_
 _atom_site_aniso_label
 _atom_site_aniso_U_11
 _atom_site_aniso_U_22
 _atom_site_aniso_U_33
 _atom_site_aniso_U_23
 _atom_site_aniso_U_13
 _atom_site_aniso_U_12
Al1 0.0166(5) 0.0367(6) 0.0348(6) -0.0193(5) 0.0007(4) -0.0003(4)
Al2 0.0153(5) 0.0328(6) 0.0359(6) -0.0217(5) 0.0013(4) 0.0002(4)
Al3 0.0170(5) 0.0288(5) 0.0383(6) -0.0186(5) 0.0024(4) -0.0011(4)
F1 0.0215(10) 0.0441(11) 0.0442(11) -0.0262(10) 0.0057(8) -0.0049(8)
F2 0.0181(9) 0.0327(10) 0.0423(11) -0.0204(9) 0.0003(7) 0.0035(7)
F3 0.0202(9) 0.0364(11) 0.0402(11) -0.0194(9) 0.0051(8) -0.0020(8)
O1 0.0170(11) 0.0306(12) 0.0362(13) -0.0170(11) 0.0004(9) -0.0018(9)
O2 0.0159(11) 0.0354(13) 0.0369(13) -0.0183(11) 0.0038(9) 0.0009(9)
O3 0.0125(11) 0.0329(12) 0.0353(13) -0.0206(10) 0.0010(9) 0.0009(9)
O4 0.0141(11) 0.0309(12) 0.0355(13) -0.0182(10) 0.0045(9) -0.0057(9)
O5 0.0137(11) 0.0317(12) 0.0377(13) -0.0200(10) 0.0060(9) -0.0020(9)
O6 0.0160(11) 0.0345(13) 0.0411(13) -0.0231(11) 0.0008(9) 0.0002(9)
O7 0.0277(12) 0.0423(14) 0.0367(14) -0.0234(11) -0.0007(10) -0.0014(10)
O8 0.0200(11) 0.0308(12) 0.0427(13) -0.0231(11) 0.0019(9) 0.0020(9)
O9 0.0222(12) 0.0308(13) 0.0375(13) -0.0140(11) 0.0012(9) 0.0004(9)
N1 0.0191(14) 0.0357(16) 0.0370(17) -0.0195(14) 0.0010(12) 0.0002(12)
N2 0.0191(15) 0.0429(17) 0.0322(16) -0.0184(14) -0.0018(11) -0.0012(12)
N3 0.0165(14) 0.0365(16) 0.0370(16) -0.0251(13) 0.0019(11) -0.0019(11)
N4 0.0150(13) 0.0320(15) 0.0325(15) -0.0186(13) 0.0006(11) 0.0028(11)
N5 0.0190(14) 0.0326(16) 0.0339(16) -0.0190(13) -0.0002(11) -0.0010(11)
N6 0.0186(14) 0.0299(16) 0.0408(17) -0.0172(13) 0.0032(12) -0.0020(12)
C1 0.0167(16) 0.0266(18) 0.0349(19) -0.0162(16) 0.0023(13) -0.0024(13)
C2 0.0224(17) 0.0293(19) 0.033(2) -0.0120(16) 0.0002(14) -0.0051(14)
C3 0.0274(19) 0.032(2) 0.045(2) -0.0094(17) -0.0018(16) -0.0057(15)
C4 0.0221(18) 0.032(2) 0.049(2) -0.0192(18) -0.0042(15) -0.0070(15)
C5 0.0186(17) 0.033(2) 0.036(2) -0.0148(16) -0.0019(14) 0.0017(14)
C6 0.0135(16) 0.0283(18) 0.0341(19) -0.0146(16) 0.0035(13) 0.0004(13)
C7 0.0284(19) 0.033(2) 0.042(2) -0.0162(17) 0.0015(15) -0.0069(15)
C8 0.0258(18) 0.034(2) 0.031(2) -0.0171(16) -0.0021(14) 0.0009(15)
C9 0.0215(18) 0.041(2) 0.043(2) -0.0205(18) 0.0051(15) -0.0033(15)
C10 0.033(2) 0.048(2) 0.031(2) -0.0182(18) 0.0087(15) -0.0055(16)
C11 0.031(2) 0.062(3) 0.031(2) -0.0199(19) -0.0026(15) -0.0019(18)
C12 0.0252(19) 0.055(2) 0.035(2) -0.0209(19) -0.0008(15) -0.0006(16)
C13 0.0262(19) 0.042(2) 0.032(2) -0.0188(17) 0.0031(15) 0.0004(15)
C14 0.0238(19) 0.048(2) 0.034(2) -0.0184(18) -0.0042(14) 0.0040(16)
C15 0.0164(16) 0.038(2) 0.0315(19) -0.0150(17) -0.0018(13) 0.0052(14)
C16 0.0180(17) 0.0325(19) 0.037(2) -0.0231(16) 0.0019(14) -0.0007(14)
C17 0.0155(16) 0.0318(19) 0.0346(19) -0.0229(16) -0.0014(13) 0.0022(13)
C18 0.0135(16) 0.037(2) 0.0350(19) -0.0211(16) 0.0034(13) -0.0022(14)
C19 0.0159(17) 0.042(2) 0.044(2) -0.0227(18) 0.0005(15) 0.0076(15)
C20 0.0252(19) 0.039(2) 0.039(2) -0.0160(18) -0.0032(15) 0.0026(15)
C21 0.0115(15) 0.0321(19) 0.0350(19) -0.0208(16) -0.0023(13) 0.0005(13)
C22 0.0110(15) 0.0281(18) 0.0283(18) -0.0125(15) 0.0004(12) 0.0026(13)
C23 0.0217(17) 0.0311(19) 0.037(2) -0.0194(16) -0.0010(14) 0.0000(14)
C24 0.0197(17) 0.039(2) 0.040(2) -0.0175(17) 0.0037(14) -0.0102(14)
C25 0.0185(17) 0.038(2) 0.0335(19) -0.0175(17) 0.0060(13) -0.0020(14)
C26 0.0170(16) 0.0307(18) 0.0319(18) -0.0154(15) 0.0001(13) 0.0026(13)
C27 0.0141(16) 0.0237(17) 0.0346(19) -0.0147(15) -0.0005(13) 0.0017(13)
C28 0.0179(16) 0.0341(19) 0.0278(18) -0.0154(15) 0.0020(13) 0.0030(14)
C29 0.0240(17) 0.0265(18) 0.0317(19) -0.0157(15) -0.0024(13) 0.0061(14)
C30 0.0209(17) 0.0289(18) 0.0322(19) -0.0178(15) 0.0002(13) 0.0041(13)
C31 0.0215(17) 0.035(2) 0.047(2) -0.0251(18) -0.0057(15) 0.0034(14)
C32 0.034(2) 0.039(2) 0.038(2) -0.0283(17) -0.0014(15) 0.0024(16)
C33 0.0240(18) 0.038(2) 0.038(2) -0.0228(17) 0.0012(14) 0.0087(15)
C34 0.0210(17) 0.037(2) 0.0308(19) -0.0164(16) 0.0008(13) 0.0030(14)
C35 0.0234(18) 0.0335(19) 0.0347(19) -0.0226(16) 0.0002(14) -0.0040(14)
C36 0.0168(16) 0.0314(19) 0.0359(19) -0.0197(16) 0.0022(13) -0.0034(13)
C37 0.0218(17) 0.0354(19) 0.0338(19) -0.0224(16) 0.0015(14) -0.0026(14)
C38 0.0156(16) 0.0301(18) 0.037(2) -0.0179(16) -0.0041(13) -0.0016(13)
C39 0.0172(16) 0.0292(18) 0.0338(19) -0.0162(16) 0.0053(13) -0.0016(13)
C40 0.0143(16) 0.0233(17) 0.0347(19) -0.0150(15) 0.0022(13) -0.0021(13)
C41 0.0158(16) 0.0243(17) 0.0356(19) -0.0151(15) 0.0027(13) -0.0043(13)
C42 0.0139(15) 0.0268(18) 0.0333(18) -0.0163(15) 0.0038(13) -0.0025(13)
C43 0.0171(16) 0.0283(18) 0.0266(17) -0.0160(15) -0.0011(12) 0.0004(13)
C44 0.0198(17) 0.0306(18) 0.0292(18) -0.0140(15) 0.0009(13) -0.0033(14)
C45 0.0136(16) 0.042(2) 0.0372(19) -0.0214(17) 0.0038(13) 0.0026(14)
C46 0.0168(16) 0.0314(19) 0.041(2) -0.0201(16) 0.0041(14) 0.0029(14)
C47 0.0179(16) 0.0291(19) 0.0363(19) -0.0160(16) -0.0011(13) 0.0008(14)
C48 0.0172(16) 0.0347(19) 0.0313(18) -0.0202(16) 0.0009(13) 0.0007(14)
C49 0.0162(17) 0.0303(19) 0.040(2) -0.0182(16) 0.0018(14) 0.0031(14)
C50 0.0203(17) 0.0325(19) 0.0309(19) -0.0177(16) 0.0070(13) -0.0025(14)
C51 0.0221(17) 0.035(2) 0.036(2) -0.0216(16) 0.0051(14) 0.0011(15)
C52 0.030(2) 0.028(2) 0.046(2) -0.0123(17) 0.0069(16) 0.0031(15)
C53 0.0286(19) 0.0270(19) 0.051(2) -0.0166(17) 0.0087(16) -0.0028(15)
C54 0.0210(17) 0.033(2) 0.047(2) -0.0205(17) 0.0079(15) -0.0061(15)
C55 0.0243(18) 0.0272(19) 0.0327(19) -0.0154(15) 0.0040(14) 0.0021(14)
C56 0.0212(18) 0.0308(19) 0.053(2) -0.0255(18) 0.0008(15) -0.0012(14)
C57 0.0184(17) 0.034(2) 0.049(2) -0.0256(17) -0.0031(14) -0.0014(14)
C58 0.0127(16) 0.0335(19) 0.0363(19) -0.0175(16) 0.0016(13) -0.0010(14)
C59 0.0152(16) 0.0316(19) 0.0378(19) -0.0214(16) 0.0039(13) -0.0037(13)
C60 0.0158(17) 0.039(2) 0.050(2) -0.0288(18) -0.0021(14) 0.0020(14)
C61 0.0195(18) 0.053(2) 0.056(2) -0.034(2) -0.0109(16) 0.0018(16)
C62 0.0262(19) 0.036(2) 0.063(2) -0.0314(19) -0.0080(16) 0.0010(15)
C63 0.041(2) 0.052(2) 0.044(2) -0.0281(19) 0.0005(17) 0.0010(18)
C64 0.032(2) 0.039(2) 0.055(2) -0.0284(19) -0.0005(16) 0.0041(16)
C65 0.032(2) 0.046(2) 0.046(2) -0.019(2) 0.0011(16) -0.0022(17)
 
_geom_special_details
;
 All esds (except the esd in the dihedral angle between two l.s. planes)
 are estimated using the full covariance matrix.  The cell esds are taken
 into account individually in the estimation of esds in distances, angles
 and torsion angles; correlations between esds in cell parameters are only
 used when they are defined by crystal symmetry.  An approximate (isotropic)
 treatment of cell esds is used for estimating esds involving l.s. planes.
;
 
loop_
 _geom_bond_atom_site_label_1
 _geom_bond_atom_site_label_2
 _geom_bond_distance
 _geom_bond_site_symmetry_2
 _geom_bond_publ_flag
Al1 F1 1.755(2) . ?
Al1 O2 1.824(2) . ?
Al1 O1 1.830(2) . ?
Al1 N1 2.017(3) . ?
Al1 O7 2.023(2) . ?
Al1 N2 2.030(3) . ?
Al2 F2 1.752(2) . ?
Al2 O4 1.819(2) . ?
Al2 O3 1.830(2) . ?
Al2 N3 2.022(3) . ?
Al2 O8 2.026(2) . ?
Al2 N4 2.028(3) . ?
Al3 F3 1.756(2) . ?
Al3 O6 1.821(2) . ?
Al3 O5 1.832(2) . ?
Al3 N5 2.020(3) . ?
Al3 O9 2.023(2) . ?
Al3 N6 2.035(3) . ?
O1 C1 1.326(3) . ?
O2 C16 1.325(3) . ?
O3 C41 1.327(3) . ?
O4 C27 1.316(3) . ?
O5 C48 1.321(3) . ?
O6 C58 1.318(4) . ?
O7 C63 1.455(4) . ?
O8 C64 1.457(4) . ?
O9 C65 1.445(4) . ?
N1 C7 1.296(4) . ?
N1 C8 1.423(4) . ?
N2 C14 1.301(4) . ?
N2 C13 1.417(4) . ?
N3 C35 1.302(4) . ?
N3 C30 1.414(4) . ?
N4 C28 1.289(4) . ?
N4 C29 1.414(4) . ?
N5 C49 1.297(4) . ?
N5 C50 1.413(4) . ?
N6 C56 1.296(4) . ?
N6 C55 1.422(4) . ?
C1 C2 1.429(4) . ?
C1 C6 1.429(4) . ?
C2 C3 1.409(4) . ?
C2 C7 1.429(4) . ?
C3 C4 1.369(5) . ?
C4 C5 1.404(4) . ?
C5 C6 1.383(4) . ?
C6 C42 1.525(4) . ?
C8 C9 1.387(4) . ?
C8 C13 1.396(4) . ?
C9 C10 1.379(5) . ?
C10 C11 1.384(5) . ?
C11 C12 1.388(4) . ?
C12 C13 1.381(4) . ?
C14 C15 1.424(4) . ?
C15 C20 1.415(4) . ?
C15 C16 1.419(4) . ?
C16 C17 1.422(4) . ?
C17 C18 1.387(4) . ?
C17 C21 1.522(4) . ?
C18 C19 1.398(4) . ?
C19 C20 1.377(4) . ?
C21 C59 1.523(4) . ?
C21 C22 1.526(4) . ?
C22 C23 1.381(4) . ?
C22 C27 1.415(4) . ?
C23 C24 1.410(4) . ?
C24 C25 1.364(4) . ?
C25 C26 1.421(4) . ?
C26 C28 1.422(4) . ?
C26 C27 1.429(4) . ?
C29 C34 1.394(4) . ?
C29 C30 1.409(4) . ?
C30 C31 1.383(4) . ?
C31 C32 1.383(4) . ?
C32 C33 1.392(4) . ?
C33 C34 1.371(4) . ?
C35 C36 1.433(4) . ?
C36 C41 1.406(4) . ?
C36 C37 1.418(4) . ?
C37 C38 1.370(4) . ?
C38 C39 1.393(4) . ?
C39 C40 1.398(4) . ?
C40 C41 1.421(4) . ?
C40 C42 1.528(4) . ?
C42 C43 1.525(4) . ?
C43 C44 1.385(4) . ?
C43 C48 1.416(4) . ?
C44 C45 1.400(4) . ?
C45 C46 1.360(4) . ?
C46 C47 1.408(4) . ?
C47 C49 1.422(4) . ?
C47 C48 1.444(4) . ?
C50 C51 1.392(4) . ?
C50 C55 1.411(4) . ?
C51 C52 1.394(4) . ?
C52 C53 1.391(5) . ?
C53 C54 1.381(4) . ?
C54 C55 1.394(4) . ?
C56 C57 1.437(4) . ?
C57 C62 1.403(4) . ?
C57 C58 1.420(4) . ?
C58 C59 1.434(4) . ?
C59 C60 1.384(4) . ?
C60 C61 1.406(4) . ?
C61 C62 1.367(4) . ?
 
loop_
 _geom_angle_atom_site_label_1
 _geom_angle_atom_site_label_2
 _geom_angle_atom_site_label_3
 _geom_angle
 _geom_angle_site_symmetry_1
 _geom_angle_site_symmetry_3
 _geom_angle_publ_flag
F1 Al1 O2 94.43(10) . . ?
F1 Al1 O1 95.56(10) . . ?
O2 Al1 O1 100.73(10) . . ?
F1 Al1 N1 90.74(10) . . ?
O2 Al1 N1 166.54(11) . . ?
O1 Al1 N1 91.10(11) . . ?
F1 Al1 O7 175.08(10) . . ?
O2 Al1 O7 88.73(10) . . ?
O1 Al1 O7 87.53(10) . . ?
N1 Al1 O7 85.37(10) . . ?
F1 Al1 N2 91.50(11) . . ?
O2 Al1 N2 89.75(11) . . ?
O1 Al1 N2 166.84(11) . . ?
N1 Al1 N2 77.69(11) . . ?
O7 Al1 N2 84.75(11) . . ?
F2 Al2 O4 94.99(10) . . ?
F2 Al2 O3 94.72(9) . . ?
O4 Al2 O3 99.65(10) . . ?
F2 Al2 N3 90.00(10) . . ?
O4 Al2 N3 167.80(10) . . ?
O3 Al2 N3 90.99(10) . . ?
F2 Al2 O8 174.84(10) . . ?
O4 Al2 O8 89.09(10) . . ?
O3 Al2 O8 87.69(9) . . ?
N3 Al2 O8 85.38(10) . . ?
F2 Al2 N4 92.63(10) . . ?
O4 Al2 N4 90.37(10) . . ?
O3 Al2 N4 166.99(11) . . ?
N3 Al2 N4 78.27(11) . . ?
O8 Al2 N4 84.17(9) . . ?
F3 Al3 O6 94.27(9) . . ?
F3 Al3 O5 95.93(10) . . ?
O6 Al3 O5 99.84(10) . . ?
F3 Al3 N5 90.54(10) . . ?
O6 Al3 N5 167.69(11) . . ?
O5 Al3 N5 90.91(11) . . ?
F3 Al3 O9 174.43(10) . . ?
O6 Al3 O9 89.15(9) . . ?
O5 Al3 O9 87.80(9) . . ?
N5 Al3 O9 85.26(9) . . ?
F3 Al3 N6 91.73(10) . . ?
O6 Al3 N6 90.51(11) . . ?
O5 Al3 N6 166.60(10) . . ?
N5 Al3 N6 78.01(11) . . ?
O9 Al3 N6 83.84(10) . . ?
C1 O1 Al1 127.35(19) . . ?
C16 O2 Al1 127.51(19) . . ?
C41 O3 Al2 128.58(19) . . ?
C27 O4 Al2 129.60(19) . . ?
C48 O5 Al3 127.88(18) . . ?
C58 O6 Al3 129.06(19) . . ?
C63 O7 Al1 124.2(2) . . ?
C64 O8 Al2 124.54(19) . . ?
C65 O9 Al3 124.68(19) . . ?
C7 N1 C8 121.5(3) . . ?
C7 N1 Al1 123.9(2) . . ?
C8 N1 Al1 114.3(2) . . ?
C14 N2 C13 121.5(3) . . ?
C14 N2 Al1 123.7(2) . . ?
C13 N2 Al1 114.1(2) . . ?
C35 N3 C30 121.4(3) . . ?
C35 N3 Al2 123.6(2) . . ?
C30 N3 Al2 114.6(2) . . ?
C28 N4 C29 121.9(2) . . ?
C28 N4 Al2 123.6(2) . . ?
C29 N4 Al2 114.28(19) . . ?
C49 N5 C50 121.1(3) . . ?
C49 N5 Al3 123.5(2) . . ?
C50 N5 Al3 114.79(19) . . ?
C56 N6 C55 121.0(3) . . ?
C56 N6 Al3 123.9(2) . . ?
C55 N6 Al3 114.7(2) . . ?
O1 C1 C2 122.5(3) . . ?
O1 C1 C6 119.2(3) . . ?
C2 C1 C6 118.3(3) . . ?
C3 C2 C1 120.5(3) . . ?
C3 C2 C7 116.4(3) . . ?
C1 C2 C7 123.1(3) . . ?
C4 C3 C2 121.0(3) . . ?
C3 C4 C5 118.1(3) . . ?
C6 C5 C4 123.9(3) . . ?
C5 C6 C1 118.0(3) . . ?
C5 C6 C42 121.6(3) . . ?
C1 C6 C42 120.3(3) . . ?
N1 C7 C2 124.3(3) . . ?
C9 C8 C13 120.4(3) . . ?
C9 C8 N1 125.9(3) . . ?
C13 C8 N1 113.6(3) . . ?
C10 C9 C8 119.0(3) . . ?
C9 C10 C11 120.7(3) . . ?
C10 C11 C12 120.6(3) . . ?
C13 C12 C11 119.1(3) . . ?
C12 C13 C8 120.2(3) . . ?
C12 C13 N2 125.9(3) . . ?
C8 C13 N2 113.8(3) . . ?
N2 C14 C15 123.4(3) . . ?
C20 C15 C16 119.6(3) . . ?
C20 C15 C14 117.2(3) . . ?
C16 C15 C14 123.2(3) . . ?
O2 C16 C15 122.7(3) . . ?
O2 C16 C17 118.1(3) . . ?
C15 C16 C17 119.2(3) . . ?
C18 C17 C16 118.4(3) . . ?
C18 C17 C21 122.8(3) . . ?
C16 C17 C21 118.7(2) . . ?
C17 C18 C19 123.0(3) . . ?
C20 C19 C18 118.6(3) . . ?
C19 C20 C15 121.0(3) . . ?
C17 C21 C59 111.3(2) . . ?
C17 C21 C22 110.7(2) . . ?
C59 C21 C22 111.0(2) . . ?
C23 C22 C27 119.7(3) . . ?
C23 C22 C21 120.8(3) . . ?
C27 C22 C21 119.2(2) . . ?
C22 C23 C24 121.9(3) . . ?
C25 C24 C23 119.2(3) . . ?
C24 C25 C26 121.1(3) . . ?
C25 C26 C28 117.9(3) . . ?
C25 C26 C27 119.5(3) . . ?
C28 C26 C27 122.6(3) . . ?
O4 C27 C22 119.4(2) . . ?
O4 C27 C26 122.0(3) . . ?
C22 C27 C26 118.6(3) . . ?
N4 C28 C26 125.2(3) . . ?
C34 C29 C30 119.2(3) . . ?
C34 C29 N4 126.7(3) . . ?
C30 C29 N4 114.1(2) . . ?
C31 C30 C29 120.1(3) . . ?
C31 C30 N3 126.1(3) . . ?
C29 C30 N3 113.8(3) . . ?
C30 C31 C32 119.7(3) . . ?
C31 C32 C33 120.5(3) . . ?
C34 C33 C32 120.2(3) . . ?
C33 C34 C29 120.3(3) . . ?
N3 C35 C36 124.6(3) . . ?
C41 C36 C37 120.8(3) . . ?
C41 C36 C35 123.5(3) . . ?
C37 C36 C35 115.7(3) . . ?
C38 C37 C36 120.2(3) . . ?
C37 C38 C39 119.1(3) . . ?
C38 C39 C40 122.7(3) . . ?
C39 C40 C41 118.3(3) . . ?
C39 C40 C42 121.1(2) . . ?
C41 C40 C42 120.3(3) . . ?
O3 C41 C36 122.3(3) . . ?
O3 C41 C40 119.0(3) . . ?
C36 C41 C40 118.8(3) . . ?
C43 C42 C6 111.3(2) . . ?
C43 C42 C40 110.4(2) . . ?
C6 C42 C40 110.2(2) . . ?
C44 C43 C48 118.9(3) . . ?
C44 C43 C42 120.7(3) . . ?
C48 C43 C42 120.3(2) . . ?
C43 C44 C45 122.7(3) . . ?
C46 C45 C44 119.4(3) . . ?
C45 C46 C47 120.8(3) . . ?
C46 C47 C49 116.8(3) . . ?
C46 C47 C48 119.9(3) . . ?
C49 C47 C48 123.3(3) . . ?
O5 C48 C43 120.4(3) . . ?
O5 C48 C47 121.4(3) . . ?
C43 C48 C47 118.3(3) . . ?
N5 C49 C47 124.7(3) . . ?
C51 C50 C55 120.1(3) . . ?
C51 C50 N5 126.2(3) . . ?
C55 C50 N5 113.7(3) . . ?
C50 C51 C52 119.4(3) . . ?
C53 C52 C51 120.1(3) . . ?
C54 C53 C52 120.9(3) . . ?
C53 C54 C55 119.6(3) . . ?
C54 C55 C50 119.7(3) . . ?
C54 C55 N6 126.6(3) . . ?
C50 C55 N6 113.7(3) . . ?
N6 C56 C57 124.2(3) . . ?
C62 C57 C58 120.0(3) . . ?
C62 C57 C56 117.1(3) . . ?
C58 C57 C56 122.9(3) . . ?
O6 C58 C57 122.8(3) . . ?
O6 C58 C59 118.6(3) . . ?
C57 C58 C59 118.6(3) . . ?
C60 C59 C58 118.7(3) . . ?
C60 C59 C21 122.0(3) . . ?
C58 C59 C21 119.0(3) . . ?
C59 C60 C61 122.3(3) . . ?
C62 C61 C60 119.1(3) . . ?
C61 C62 C57 121.3(3) . . ?
 
_refine_diff_density_max    0.460
_refine_diff_density_min   -0.292
_refine_diff_density_rms    0.051

_shelx_res_file
;

    5.res created by SHELXL-2014/7


TITL 3 in P-1
CELL 0.71073  13.0600  19.9202  21.4896  65.028  87.853  89.408
ZERR    2.00   0.0063   0.0100   0.0108   0.006   0.007   0.007
LATT  1
SFAC C H N O AL F
UNIT 130 94 12 18 6 6

L.S. 20
BOND
FMAP 2
PLAN 20

ACTA

ABIN
WGHT    0.077000
FVAR       0.12722
MOLE   1
AL1   5    0.302537    0.949702    0.139904    11.00000    0.01660    0.03667 =
         0.03480   -0.01929    0.00075   -0.00027
AL2   5    0.214056    0.903206    0.445863    11.00000    0.01534    0.03278 =
         0.03592   -0.02170    0.00133    0.00018
AL3   5    0.331116    0.635327    0.380549    11.00000    0.01704    0.02880 =
         0.03826   -0.01864    0.00239   -0.00109
F1    6    0.333118    0.889075    0.101973    11.00000    0.02146    0.04406 =
         0.04418   -0.02622    0.00571   -0.00493
F2    6    0.194283    0.997501    0.394774    11.00000    0.01806    0.03265 =
         0.04226   -0.02041    0.00025    0.00352
F3    6    0.303744    0.599152    0.469356    11.00000    0.02020    0.03641 =
         0.04020   -0.01939    0.00505   -0.00197
O1    4    0.402774    0.917225    0.203090    11.00000    0.01698    0.03063 =
         0.03623   -0.01699    0.00045   -0.00183
O2    4    0.193496    0.894795    0.190793    11.00000    0.01585    0.03543 =
         0.03693   -0.01828    0.00377    0.00092
O3    4    0.339379    0.900516    0.405929    11.00000    0.01252    0.03294 =
         0.03534   -0.02063    0.00096    0.00086
O4    4    0.133705    0.871038    0.396499    11.00000    0.01406    0.03092 =
         0.03549   -0.01820    0.00454   -0.00568
O5    4    0.416668    0.709277    0.376912    11.00000    0.01369    0.03171 =
         0.03772   -0.02000    0.00603   -0.00198
O6    4    0.211621    0.686490    0.357772    11.00000    0.01597    0.03452 =
         0.04113   -0.02305    0.00079    0.00020
O7    4    0.267813    1.026745    0.175436    11.00000    0.02772    0.04231 =
         0.03671   -0.02342   -0.00066   -0.00137
O8    4    0.236562    0.796437    0.512333    11.00000    0.01997    0.03084 =
         0.04269   -0.02305    0.00192    0.00198
O9    4    0.365279    0.666787    0.279510    11.00000    0.02224    0.03082 =
         0.03753   -0.01402    0.00124    0.00041

N1    3    0.397517    1.027590    0.071926    11.00000    0.01914    0.03567 =
         0.03704   -0.01948    0.00105    0.00020
N2    3    0.207626    1.008505    0.063130    11.00000    0.01911    0.04295 =
         0.03220   -0.01844   -0.00178   -0.00115
N3    3    0.280256    0.928820    0.516699    11.00000    0.01653    0.03648 =
         0.03704   -0.02509    0.00194   -0.00195
N4    3    0.093034    0.897092    0.510010    11.00000    0.01498    0.03200 =
         0.03247   -0.01860    0.00064    0.00276
N5    3    0.450592    0.565494    0.396279    11.00000    0.01899    0.03264 =
         0.03387   -0.01896   -0.00015   -0.00103
N6    3    0.264776    0.546587    0.374172    11.00000    0.01864    0.02990 =
         0.04077   -0.01719    0.00319   -0.00200
C1    1    0.477417    0.957028    0.211328    11.00000    0.01673    0.02659 =
         0.03486   -0.01625    0.00235   -0.00243
C2    1    0.515887    1.023607    0.156778    11.00000    0.02245    0.02932 =
         0.03325   -0.01201    0.00022   -0.00507
C3    1    0.595629    1.063944    0.167868    11.00000    0.02739    0.03176 =
         0.04492   -0.00943   -0.00178   -0.00574
AFIX  43
H3    2    0.620892    1.106554    0.131589    11.00000   -1.20000
AFIX   0
C4    1    0.636490    1.041370    0.231233    11.00000    0.02214    0.03223 =
         0.04901   -0.01918   -0.00422   -0.00702
AFIX  43
H4    2    0.686990    1.069219    0.239016    11.00000   -1.20000
AFIX   0
C5    1    0.600027    0.975008    0.284132    11.00000    0.01860    0.03322 =
         0.03628   -0.01476   -0.00194    0.00170
AFIX  43
H5    2    0.628708    0.959291    0.326943    11.00000   -1.20000
AFIX   0
C6    1    0.523999    0.931592    0.276402    11.00000    0.01352    0.02830 =
         0.03406   -0.01464    0.00345    0.00037
C7    1    0.478327    1.052351    0.088835    11.00000    0.02837    0.03336 =
         0.04237   -0.01622    0.00154   -0.00687
AFIX  43
H7    2    0.514199    1.091360    0.054520    11.00000   -1.20000
AFIX   0
C8    1    0.363374    1.059287    0.003416    11.00000    0.02580    0.03440 =
         0.03079   -0.01713   -0.00211    0.00086
C9    1    0.424378    1.095565   -0.055524    11.00000    0.02148    0.04144 =
         0.04264   -0.02047    0.00508   -0.00335
AFIX  43
H9    2    0.494254    1.101678   -0.052559    11.00000   -1.20000
AFIX   0
C10   1    0.379786    1.122429   -0.118592    11.00000    0.03340    0.04791 =
         0.03066   -0.01824    0.00874   -0.00552
AFIX  43
H10   2    0.419986    1.146918   -0.158407    11.00000   -1.20000
AFIX   0
C11   1    0.275863    1.113334   -0.123259    11.00000    0.03136    0.06233 =
         0.03136   -0.01989   -0.00258   -0.00193
AFIX  43
H11   2    0.246758    1.132271   -0.166116    11.00000   -1.20000
AFIX   0
C12   1    0.214729    1.076203   -0.064544    11.00000    0.02523    0.05490 =
         0.03543   -0.02092   -0.00082   -0.00056
AFIX  43
H12   2    0.145052    1.069662   -0.067805    11.00000   -1.20000
AFIX   0
C13   1    0.258776    1.049092   -0.001196    11.00000    0.02623    0.04162 =
         0.03209   -0.01876    0.00314    0.00035
C14   1    0.110596    1.017853    0.072980    11.00000    0.02381    0.04757 =
         0.03368   -0.01844   -0.00418    0.00398
AFIX  43
H14   2    0.075022    1.052199    0.036566    11.00000   -1.20000
AFIX   0
C15   1    0.056056    0.978212    0.136635    11.00000    0.01642    0.03826 =
         0.03154   -0.01498   -0.00184    0.00522
C16   1    0.097850    0.917138    0.192215    11.00000    0.01795    0.03250 =
         0.03743   -0.02310    0.00191   -0.00071
C17   1    0.035197    0.877609    0.252038    11.00000    0.01555    0.03184 =
         0.03461   -0.02294   -0.00145    0.00224
C18   1   -0.063539    0.902582    0.255141    11.00000    0.01346    0.03686 =
         0.03503   -0.02109    0.00343   -0.00219
AFIX  43
H18   2   -0.104089    0.877362    0.294633    11.00000   -1.20000
AFIX   0
C19   1   -0.104925    0.963951    0.201607    11.00000    0.01590    0.04234 =
         0.04373   -0.02267    0.00053    0.00758
AFIX  43
H19   2   -0.171083    0.979682    0.205754    11.00000   -1.20000
AFIX   0
C20   1   -0.045632    1.000592    0.142621    11.00000    0.02521    0.03950 =
         0.03947   -0.01597   -0.00321    0.00264
AFIX  43
H20   2   -0.072844    1.040677    0.106144    11.00000   -1.20000
AFIX   0
C21   1    0.077084    0.807381    0.308062    11.00000    0.01145    0.03208 =
         0.03496   -0.02077   -0.00227    0.00050
AFIX  13
H21   2    0.149621    0.815947    0.312602    11.00000   -1.20000
AFIX   0
C22   1    0.021822    0.790327    0.376959    11.00000    0.01095    0.02805 =
         0.02831   -0.01248    0.00045    0.00257
C23   1   -0.062284    0.743586    0.398376    11.00000    0.02165    0.03115 =
         0.03695   -0.01937   -0.00098    0.00001
AFIX  43
H23   2   -0.079862    0.717603    0.373098    11.00000   -1.20000
AFIX   0
C24   1   -0.122274    0.734114    0.457451    11.00000    0.01967    0.03895 =
         0.04004   -0.01754    0.00372   -0.01018
AFIX  43
H24   2   -0.178782    0.702492    0.470789    11.00000   -1.20000
AFIX   0
C25   1   -0.096432    0.771890    0.494803    11.00000    0.01846    0.03814 =
         0.03354   -0.01746    0.00595   -0.00197
AFIX  43
H25   2   -0.136885    0.766854    0.533088    11.00000   -1.20000
AFIX   0
C26   1   -0.008681    0.818824    0.476158    11.00000    0.01701    0.03071 =
         0.03191   -0.01544    0.00006    0.00262
C27   1    0.052134    0.827887    0.416426    11.00000    0.01412    0.02365 =
         0.03462   -0.01467   -0.00048    0.00173
C28   1    0.012479    0.857349    0.516904    11.00000    0.01785    0.03413 =
         0.02777   -0.01536    0.00201    0.00296
AFIX  43
H28   2   -0.035625    0.853575    0.551264    11.00000   -1.20000
AFIX   0
C29   1    0.108015    0.934515    0.552119    11.00000    0.02405    0.02655 =
         0.03166   -0.01575   -0.00237    0.00609
C30   1    0.211211    0.952092    0.555813    11.00000    0.02092    0.02893 =
         0.03222   -0.01782    0.00023    0.00411
C31   1    0.236511    0.990229    0.594003    11.00000    0.02151    0.03493 =
         0.04738   -0.02513   -0.00570    0.00339
AFIX  43
H31   2    0.304358    1.003078    0.595425    11.00000   -1.20000
AFIX   0
C32   1    0.160410    1.009170    0.630074    11.00000    0.03408    0.03869 =
         0.03802   -0.02830   -0.00140    0.00240
AFIX  43
H32   2    0.177485    1.033912    0.656550    11.00000   -1.20000
AFIX   0
C33   1    0.058406    0.991467    0.627041    11.00000    0.02399    0.03839 =
         0.03774   -0.02282    0.00121    0.00865
AFIX  43
H33   2    0.007697    1.004641    0.651285    11.00000   -1.20000
AFIX   0
C34   1    0.032488    0.954685    0.588435    11.00000    0.02103    0.03698 =
         0.03077   -0.01644    0.00083    0.00295
AFIX  43
H34   2   -0.035783    0.943142    0.586469    11.00000   -1.20000
AFIX   0
C35   1    0.376957    0.918711    0.530426    11.00000    0.02341    0.03353 =
         0.03466   -0.02264    0.00020   -0.00397
AFIX  43
H35   2    0.399813    0.929095    0.565911    11.00000   -1.20000
AFIX   0
C36   1    0.450658    0.892713    0.494721    11.00000    0.01681    0.03135 =
         0.03591   -0.01967    0.00219   -0.00336
C37   1    0.548871    0.876253    0.523275    11.00000    0.02181    0.03537 =
         0.03377   -0.02239    0.00150   -0.00264
AFIX  43
H37   2    0.562577    0.884252    0.561774    11.00000   -1.20000
AFIX   0
C38   1    0.623633    0.848608    0.494339    11.00000    0.01560    0.03008 =
         0.03708   -0.01789   -0.00409   -0.00160
AFIX  43
H38   2    0.687531    0.836437    0.513698    11.00000   -1.20000
AFIX   0
C39   1    0.602721    0.838959    0.435541    11.00000    0.01718    0.02917 =
         0.03383   -0.01622    0.00534   -0.00160
AFIX  43
H39   2    0.653486    0.819402    0.416618    11.00000   -1.20000
AFIX   0
C40   1    0.508553    0.857462    0.403796    11.00000    0.01433    0.02333 =
         0.03472   -0.01496    0.00217   -0.00208
C41   1    0.429689    0.883959    0.434853    11.00000    0.01579    0.02429 =
         0.03556   -0.01511    0.00270   -0.00428
C42   1    0.493697    0.856755    0.333892    11.00000    0.01385    0.02676 =
         0.03335   -0.01626    0.00381   -0.00248
AFIX  13
H42   2    0.420909    0.848053    0.330234    11.00000   -1.20000
AFIX   0
C43   1    0.554907    0.794080    0.327780    11.00000    0.01713    0.02830 =
         0.02659   -0.01604   -0.00111    0.00038
C44   1    0.654824    0.805677    0.301375    11.00000    0.01980    0.03058 =
         0.02923   -0.01405    0.00091   -0.00330
AFIX  43
H44   2    0.681397    0.853567    0.282926    11.00000   -1.20000
AFIX   0
C45   1    0.717434    0.748229    0.301333    11.00000    0.01364    0.04234 =
         0.03717   -0.02143    0.00380    0.00260
AFIX  43
H45   2    0.784035    0.758158    0.282841    11.00000   -1.20000
AFIX   0
C46   1    0.680043    0.677760    0.328566    11.00000    0.01684    0.03145 =
         0.04130   -0.02007    0.00409    0.00288
AFIX  43
H46   2    0.722297    0.639246    0.330151    11.00000   -1.20000
AFIX   0
C47   1    0.578115    0.662438    0.354387    11.00000    0.01786    0.02913 =
         0.03627   -0.01603   -0.00109    0.00083
C48   1    0.512853    0.721724    0.353600    11.00000    0.01724    0.03466 =
         0.03125   -0.02023    0.00091    0.00072
C49   1    0.544911    0.587494    0.380036    11.00000    0.01617    0.03025 =
         0.03994   -0.01819    0.00181    0.00314
AFIX  43
H49   2    0.594381    0.551692    0.385556    11.00000   -1.20000
AFIX   0
C50   1    0.423133    0.490345    0.417813    11.00000    0.02029    0.03250 =
         0.03095   -0.01768    0.00701   -0.00250
C51   1    0.486168    0.429554    0.449911    11.00000    0.02211    0.03516 =
         0.03592   -0.02158    0.00511    0.00114
AFIX  43
H51   2    0.551828    0.436074    0.461846    11.00000   -1.20000
AFIX   0
C52   1    0.450044    0.358819    0.464014    11.00000    0.03049    0.02811 =
         0.04633   -0.01225    0.00692    0.00307
AFIX  43
H52   2    0.491673    0.317907    0.485502    11.00000   -1.20000
AFIX   0
C53   1    0.351834    0.349302    0.446007    11.00000    0.02856    0.02695 =
         0.05130   -0.01662    0.00868   -0.00284
AFIX  43
H53   2    0.329458    0.302172    0.453721    11.00000   -1.20000
AFIX   0
C54   1    0.287108    0.408886    0.416830    11.00000    0.02101    0.03253 =
         0.04706   -0.02052    0.00792   -0.00605
AFIX  43
H54   2    0.220724    0.401653    0.406559    11.00000   -1.20000
AFIX   0
C55   1    0.321835    0.479937    0.402859    11.00000    0.02432    0.02719 =
         0.03273   -0.01542    0.00399    0.00213
C56   1    0.183638    0.550676    0.339825    11.00000    0.02118    0.03083 =
         0.05301   -0.02551    0.00078   -0.00122
AFIX  43
H56   2    0.163962    0.508661    0.334607    11.00000   -1.20000
AFIX   0
C57   1    0.122165    0.615982    0.309300    11.00000    0.01839    0.03439 =
         0.04944   -0.02558   -0.00314   -0.00139
C58   1    0.137984    0.680701    0.320022    11.00000    0.01266    0.03355 =
         0.03634   -0.01754    0.00164   -0.00105
C59   1    0.070133    0.742052    0.289134    11.00000    0.01525    0.03160 =
         0.03775   -0.02139    0.00394   -0.00368
C60   1   -0.005473    0.736960    0.247896    11.00000    0.01577    0.03944 =
         0.05008   -0.02883   -0.00207    0.00196
AFIX  43
H60   2   -0.047910    0.777386    0.226403    11.00000   -1.20000
AFIX   0
C61   1   -0.020353    0.672771    0.237366    11.00000    0.01948    0.05276 =
         0.05581   -0.03420   -0.01093    0.00180
AFIX  43
H61   2   -0.071916    0.670799    0.209476    11.00000   -1.20000
AFIX   0
C62   1    0.042043    0.613301    0.268703    11.00000    0.02618    0.03557 =
         0.06264   -0.03137   -0.00801    0.00096
AFIX  43
H62   2    0.031160    0.570207    0.262995    11.00000   -1.20000
AFIX   0
C63   1    0.240391    1.009621    0.246825    11.00000    0.04069    0.05205 =
         0.04354   -0.02808    0.00052    0.00096
AFIX 137
H63A  2    0.170199    0.993543    0.256419    11.00000   -1.50000
H63B  2    0.249075    1.053066    0.254872    11.00000   -1.50000
H63C  2    0.283809    0.970958    0.276280    11.00000   -1.50000
AFIX   0
C64   1    0.262156    0.736998    0.492022    11.00000    0.03228    0.03889 =
         0.05521   -0.02836   -0.00047    0.00410
AFIX 137
H64A  2    0.200608    0.711726    0.490777    11.00000   -1.50000
H64B  2    0.307170    0.702675    0.524602    11.00000   -1.50000
H64C  2    0.295560    0.757416    0.447300    11.00000   -1.50000
AFIX   0
C65   1    0.356848    0.741569    0.227087    11.00000    0.03152    0.04563 =
         0.04584   -0.01904    0.00106   -0.00215
AFIX 137
H65A  2    0.303748    0.743530    0.196668    11.00000   -1.50000
H65B  2    0.420820    0.756481    0.201488    11.00000   -1.50000
H65C  2    0.340377    0.774362    0.248287    11.00000   -1.50000

AFIX   0
HKLF 4

REM  3 in P-1
REM R1 =  0.0556 for    9858 Fo > 4sig(Fo)  and  0.0991 for all   17212 data
REM    778 parameters refined using      0 restraints

END

WGHT      0.0784      0.0000

REM Highest difference peak  0.460,  deepest hole -0.292,  1-sigma level  0.051
Q1    1   0.2169  0.7833  0.5625  11.00000  0.05    0.46
Q2    1   0.3645  0.6298  0.2614  11.00000  0.05    0.44
Q3    1   0.2551  0.7486  0.4380  11.00000  0.05    0.35
Q4    1   0.2534  0.5560  0.5207  11.00000  0.05    0.34
Q5    1   0.3722  0.6482  0.3122  11.00000  0.05    0.30
Q6    1   0.2676  1.0907  0.1417  11.00000  0.05    0.29
Q7    1   0.1620  0.9133  0.1888  11.00000  0.05    0.27
Q8    1   0.3459  0.6875  0.2672  11.00000  0.05    0.26
Q9    1   0.3660  0.9967  0.0928  11.00000  0.05    0.25
Q10   1   0.5522  0.8553  0.4083  11.00000  0.05    0.25
Q11   1   0.2430  0.8251  0.4988  11.00000  0.05    0.25
Q12   1   0.0584  0.7926  0.3489  11.00000  0.05    0.24
Q13   1   0.4003  0.8933  0.5884  11.00000  0.05    0.24
Q14   1   0.0304  0.8032  0.4588  11.00000  0.05    0.24
Q15   1   0.6090  1.0001  0.2637  11.00000  0.05    0.23
Q16   1   0.2624  0.6751  0.5479  11.00000  0.05    0.23
Q17   1   0.0823  0.9235  0.5929  11.00000  0.05    0.23
Q18   1   0.0350  0.7385  0.2836  11.00000  0.05    0.22
Q19   1   0.4130  0.8607  0.3140  11.00000  0.05    0.22
Q20   1   0.0788  0.9575  0.1626  11.00000  0.05    0.22
;
_shelx_res_checksum   13358

_shelx_hkl_file
;
  -2   0   0    0.88    0.19
  -3   0   0   70.84    1.93
  -4   0   0   23.71    0.92
  -5   0   0    0.47    0.38
  -6   0   0    4.35    0.63
  -7   0   0   30.99    1.40
  -8   0   0   13.01    1.14
  -9   0   0   14.51    1.29
 -10   0   0   16.74    1.51
 -11   0   0    8.84    1.20
 -12   0   0    1.67    1.07
 -13   0   0    4.84    1.29
 -14   0   0    1.57    1.28
 -15   0   0    5.31    1.56
 -15   1   0    2.93    1.48
 -14   1   0    0.53    1.28
 -13   1   0    2.08    1.19
 -12   1   0   -0.11    1.02
 -11   1   0   -0.75    0.87
 -10   1   0    2.96    0.85
  -9   1   0    1.16    0.69
  -8   1   0    7.19    0.80
  -7   1   0   73.15    2.33
  -6   1   0  134.64    3.65
  -5   1   0   51.18    1.62
  -4   1   0    1.73    0.23
  -4   1   0    1.90    0.38
  -3   1   0    3.81    0.47
  -3   1   0    4.82    0.43
  -2   1   0   20.91    0.71
  -2   1   0   22.16    0.62
   1  -1   0  100.22    2.46
   1  -1   0  101.82    2.43
  -1   1   0  102.00    2.43
  -1  -1   0  180.06    4.27
  -1  -1   0  184.59    4.32
  -2  -1   0   59.53    1.55
  -3  -1   0    3.40    0.41
  -4  -1   0   -0.38    0.30
  -5  -1   0    1.77    0.42
  -6  -1   0    1.87    0.52
  -7  -1   0   54.25    1.88
  -8  -1   0   -0.31    0.55
  -9  -1   0   10.04    0.99
 -10  -1   0   67.97    2.56
 -11  -1   0    3.60    1.02
 -12  -1   0    8.63    1.30
 -13  -1   0    0.80    1.13
 -14  -1   0   -2.24    1.19
 -15  -1   0    0.44    1.38
 -15   2   0    3.91    1.56
 -14   2   0   15.70    1.80
 -13   2   0    0.55    1.20
 -12   2   0   11.60    1.39
 -11   2   0    8.10    1.19
 -10   2   0   -1.20    0.76
  -9   2   0    0.83    0.67
  -8   2   0    2.31    0.63
  -7   2   0   12.05    1.06
  -6   2   0    8.03    0.55
  -6   2   0    7.35    0.71
  -5   2   0    7.80    0.73
  -5   2   0    7.84    0.49
  -4   2   0    0.17    0.23
  -4   2   0   -0.19    0.31
  -3   2   0   82.25    2.08
  -3   2   0   79.57    2.18
  -2   2   0  346.63    8.13
  -2   2   0  342.93    8.22
  -1   2   0  116.82    2.83
   0  -2   0  196.53    4.43
   0  -2   0  195.49    4.65
   0   2   0  197.30    4.67
   0   2   0  198.40    4.43
  -2  -2   0    0.16    0.25
   2   2   0    0.13    0.23
  -3  -2   0   46.89    1.39
   3   2   0   47.31    1.25
  -4  -2   0   68.53    1.90
  -5  -2   0   13.55    0.80
  -6  -2   0    3.37    0.56
  -7  -2   0    2.83    0.58
  -8  -2   0   17.25    1.17
  -9  -2   0   25.74    1.51
 -10  -2   0   22.29    1.61
 -11  -2   0    1.32    0.96
 -12  -2   0    8.63    1.30
 -13  -2   0   -0.10    1.11
 -14  -2   0    2.58    1.35
 -15  -2   0    2.93    1.46
 -15   3   0    2.65    1.49
 -14   3   0    1.41    1.33
 -13   3   0    0.11    1.23
 -12   3   0    7.48    1.27
 -11   3   0   38.13    2.13
 -10   3   0    7.84    1.06
  -9   3   0    3.79    0.47
  -9   3   0    5.02    0.85
  -8   3   0    0.76    0.61
  -8   3   0    1.20    0.36
  -7   3   0   43.90    1.69
  -7   3   0   42.85    1.33
  -6   3   0    3.73    0.62
  -6   3   0    2.36    0.38
  -5   3   0   20.70    0.81
  -5   3   0   20.78    1.02
  -4   3   0   91.48    2.47
  -4   3   0   90.13    2.34
  -3   3   0    1.63    0.36
  -3   3   0    2.15    0.33
  -2   3   0   68.64    1.82
  -2   3   0   66.20    1.81
  -1   3   0  203.52    4.90
   0  -3   0   28.99    0.80
   0  -3   0   28.56    0.79
   0   3   0   28.99    0.80
   0   3   0   30.03    0.90
   1   3   0   28.05    0.89
   2   3   0    2.83    0.39
  -3  -3   0   21.20    0.79
   3   3   0   19.74    0.74
  -4  -3   0   58.55    1.66
   4   3   0   57.78    1.53
  -5  -3   0   18.94    0.91
  -6  -3   0    1.00    0.47
  -7  -3   0   11.47    0.99
  -8  -3   0    7.23    0.78
  -9  -3   0   22.31    1.42
 -10  -3   0   21.54    1.58
 -11  -3   0    6.80    1.13
 -12  -3   0   -0.02    1.04
 -13  -3   0    1.06    1.14
 -14  -3   0    1.25    1.25
 -15  -3   0    0.40    1.39
 -15   4   0    3.91    1.53
 -14   4   0    0.08    1.31
 -13   4   0    4.55    1.31
 -12   4   0    1.35    1.11
 -11   4   0    3.75    1.08
 -10   4   0   -0.07    0.87
  -9   4   0    8.53    0.78
  -9   4   0    8.33    0.99
  -8   4   0   17.93    0.90
  -8   4   0   17.92    1.27
  -7   4   0    0.19    0.36
  -7   4   0   -0.88    0.48
  -6   4   0   84.71    2.56
  -6   4   0   85.80    2.32
  -5   4   0   55.58    1.81
  -5   4   0   56.10    1.64
  -4   4   0   69.62    2.03
  -4   4   0   72.56    1.96
  -3   4   0  109.25    2.82
  -3   4   0  109.87    2.84
  -2   4   0    8.52    0.64
  -1   4   0   35.27    1.18
  -1   4   0   34.62    1.06
   0  -4   0    2.22    0.37
   0   4   0    1.95    0.31
   0   4   0    2.64    0.44
  -1  -4   0  193.34    4.49
   1   4   0  192.57    4.71
  -3  -4   0   50.61    1.44
   3   4   0   51.05    1.43
  -4  -4   0   13.51    0.70
   4   4   0   12.80    0.63
  -5  -4   0    9.89    0.76
   5   4   0   11.41    0.63
  -6  -4   0   29.81    1.26
  -7  -4   0    1.69    0.55
  -8  -4   0    0.11    0.56
  -9  -4   0   69.19    2.41
 -10  -4   0    3.52    0.92
 -11  -4   0   16.07    1.40
 -12  -4   0   -1.97    0.98
 -13  -4   0    0.52    1.16
 -14  -4   0    1.33    1.28
 -15  -4   0   -0.02    1.37
 -14   5   0   28.53    2.38
 -13   5   0    7.08    1.43
 -12   5   0    2.22    1.13
 -11   5   0    0.22    0.96
 -10   5   0   -0.36    0.87
  -9   5   0   -0.17    0.49
  -9   5   0    0.02    0.73
  -8   5   0    4.03    0.78
  -8   5   0    4.14    0.55
  -7   5   0    0.60    0.54
  -7   5   0    0.13    0.40
  -6   5   0    3.04    0.48
  -5   5   0   40.56    1.52
  -5   5   0   42.66    1.41
  -4   5   0   95.91    2.53
  -4   5   0   89.89    2.54
  -3   5   0   28.32    1.02
  -3   5   0   28.04    1.03
  -2   5   0  173.94    4.34
  -1   5   0  157.08    3.87
  -1   5   0  158.94    3.97
   0  -5   0    3.51    0.36
   0   5   0    3.23    0.31
   0   5   0    4.23    0.47
  -1  -5   0  413.30    9.35
   1   5   0  411.65    9.83
   2   5   0  150.98    3.80
   3   5   0    4.00    0.43
  -4  -5   0   17.15    0.81
   4   5   0   17.60    0.81
  -5  -5   0    0.77    0.42
   5   5   0    0.64    0.40
  -6  -5   0    6.38    0.65
   6   5   0    8.58    0.67
  -7  -5   0    0.76    0.41
  -7  -5   0    0.47    0.49
  -8  -5   0   16.76    1.19
  -9  -5   0   37.01    1.73
 -10  -5   0   26.17    1.70
 -11  -5   0    5.18    1.07
 -12  -5   0   -0.45    1.05
 -13  -5   0    1.88    1.20
 -14  -5   0   -0.12    1.22
 -14   6   0    4.28    1.43
 -13   6   0    0.58    1.22
 -12   6   0   43.53    2.41
 -11   6   0   20.36    1.84
 -10   6   0    7.23    1.12
 -10   6   0    7.99    0.81
  -9   6   0    0.72    0.57
  -9   6   0    0.54    0.78
  -8   6   0    2.13    0.69
  -8   6   0   -0.86    0.47
  -7   6   0   35.47    1.55
  -7   6   0   38.19    1.40
  -6   6   0   11.03    0.85
  -6   6   0   11.98    0.96
  -5   6   0   90.72    2.59
  -5   6   0   84.80    2.48
  -4   6   0  101.50    2.80
  -4   6   0  102.73    2.81
  -3   6   0   -0.35    0.37
  -2   6   0    0.07    0.36
  -1   6   0  123.97    3.09
  -1   6   0  123.04    3.22
   0  -6   0   63.05    1.61
   0   6   0   60.40    1.79
   0   6   0   61.04    1.63
  -1  -6   0    5.12    0.43
   1   6   0    5.00    0.49
  -2  -6   0    3.99    0.48
   2   6   0    3.16    0.43
  -4  -6   0  134.39    3.46
   4   6   0  133.89    3.47
  -5  -6   0   29.42    1.18
   5   6   0   29.27    1.15
  -6  -6   0   15.71    0.95
   6   6   0   14.19    0.82
  -7  -6   0    1.36    0.54
   7   6   0    1.37    0.44
  -8  -6   0    8.49    0.84
  -9  -6   0    0.42    0.74
 -10  -6   0    1.20    0.86
 -11  -6   0    0.40    0.94
 -12  -6   0    5.70    1.21
 -13  -6   0   -0.53    1.19
 -14  -6   0   -1.38    1.20
 -14   7   0    1.81    1.39
 -13   7   0   12.27    1.59
 -12   7   0    2.17    1.19
 -11   7   0   -0.48    0.98
 -10   7   0   26.17    1.81
 -10   7   0   23.41    1.40
  -9   7   0   34.52    1.54
  -9   7   0   32.46    1.85
  -8   7   0   -0.51    0.68
  -8   7   0    0.29    0.56
  -7   7   0   -0.04    0.51
  -7   7   0   -0.02    0.57
  -6   7   0    7.73    0.77
  -6   7   0    8.25    0.73
  -5   7   0   32.98    1.36
  -5   7   0   31.99    1.33
  -4   7   0    6.67    0.66
  -4   7   0    7.85    0.72
  -3   7   0   28.70    1.23
  -2   7   0    0.19    0.43
  -2   7   0    0.26    0.33
  -1   7   0   99.96    2.58
  -1   7   0   99.11    2.73
   0  -7   0    4.50    0.43
   0   7   0    5.18    0.48
   0   7   0    4.93    0.54
  -1  -7   0   36.50    1.17
   1   7   0   35.32    1.29
  -2  -7   0  113.74    2.87
   2   7   0  110.34    3.01
   3   7   0  104.93    2.88
  -4  -7   0   30.46    1.16
   4   7   0   30.26    1.22
  -5  -7   0   39.37    1.39
   5   7   0   41.57    1.45
  -6  -7   0    0.31    0.46
   6   7   0   -0.16    0.44
  -7  -7   0    5.60    0.71
   7   7   0    6.06    0.60
  -8  -7   0    8.21    0.85
   8   7   0    8.53    0.81
  -9  -7   0   28.11    1.63
 -10  -7   0   16.54    1.55
 -11  -7   0    0.41    0.93
 -12  -7   0    5.59    1.23
 -13  -7   0   14.72    1.61
 -14  -7   0    0.92    1.31
 -14   8   0   -0.14    1.41
 -13   8   0    1.28    1.30
 -12   8   0    2.28    1.25
 -11   8   0    0.89    1.09
 -10   8   0   22.48    1.47
 -10   8   0   23.62    1.82
  -9   8   0    5.01    1.02
  -9   8   0    4.73    0.84
  -8   8   0   24.46    1.59
  -8   8   0   26.76    1.43
  -7   8   0   43.69    1.70
  -7   8   0   44.22    1.84
  -6   8   0   19.74    1.23
  -6   8   0   20.60    1.18
  -5   8   0    8.24    0.78
  -5   8   0    7.92    0.74
  -4   8   0   15.23    1.05
  -4   8   0   15.39    0.98
  -3   8   0   22.86    1.21
  -2   8   0    2.31    0.58
  -2   8   0    1.56    0.42
  -1   8   0  119.99    3.28
  -1   8   0  119.33    3.07
   0  -8   0   33.85    1.18
   0   8   0   36.19    1.13
   0   8   0   33.84    1.37
  -1  -8   0    0.15    0.43
   1   8   0   -0.66    0.48
  -2  -8   0    3.79    0.58
   2   8   0    5.18    0.65
  -3  -8   0   15.51    1.07
   3   8   0   15.87    1.01
  -5  -8   0    7.22    0.61
   5   8   0    5.69    0.66
  -6  -8   0    5.92    0.62
   6   8   0    5.58    0.66
  -7  -8   0   10.92    1.03
   7   8   0   12.66    0.96
  -8  -8   0    0.63    0.67
   8   8   0    0.55    0.58
  -9  -8   0   -0.11    0.79
 -10  -8   0   -0.69    0.86
 -11  -8   0   10.63    1.23
 -12  -8   0    1.36    1.09
 -13  -8   0   17.93    1.73
 -14  -8   0    0.61    1.32
 -13   9   0    5.38    1.42
 -12   9   0    0.92    1.23
 -11   9   0   15.61    1.53
 -10   9   0   13.20    1.37
 -10   9   0   13.05    1.14
  -9   9   0    0.93    0.93
  -9   9   0    0.74    0.78
  -8   9   0    3.53    0.93
  -8   9   0    3.87    0.84
  -7   9   0  134.35    3.90
  -7   9   0  136.76    3.85
  -6   9   0    1.62    0.66
  -6   9   0    2.32    0.67
  -5   9   0   42.15    1.71
  -5   9   0   45.38    1.67
  -3   9   0    2.46    0.61
  -3   9   0    2.47    0.51
  -2   9   0    8.25    0.72
  -2   9   0    7.91    0.77
  -1   9   0   56.12    1.65
  -1   9   0   54.59    1.89
   0  -9   0   14.11    0.87
   0   9   0   16.64    1.06
   0   9   0   13.93    0.77
  -1  -9   0   18.54    0.96
   1   9   0   19.06    1.12
  -2  -9   0    8.13    0.70
   2   9   0    8.13    0.75
  -3  -9   0   27.73    1.27
   3   9   0   26.65    1.29
  -4  -9   0    2.56    0.71
   4   9   0    3.91    0.65
  -5  -9   0   13.63    0.87
   5   9   0   13.24    1.02
  -6  -9   0    0.00    0.48
   6   9   0    0.48    0.59
  -7  -9   0   20.37    1.25
   7   9   0   20.33    1.20
  -8  -9   0   17.62    1.37
   8   9   0   17.41    1.18
  -9  -9   0   39.74    1.86
 -10  -9   0   14.79    1.32
 -11  -9   0    1.72    1.00
 -12  -9   0    1.28    1.08
 -13  -9   0    1.58    1.24
 -13  10   0    2.90    1.43
 -12  10   0   -1.06    1.16
 -11  10   0    3.97    1.21
 -10  10   0    1.74    0.89
 -10  10   0   -0.09    1.02
  -9  10   0   -0.01    0.81
  -9  10   0    1.34    0.98
  -8  10   0   15.79    1.52
  -8  10   0   15.15    1.45
  -7  10   0   32.32    1.65
  -7  10   0   31.71    1.68
  -6  10   0   17.87    1.32
  -6  10   0   20.60    1.40
  -5  10   0   29.21    1.46
  -5  10   0   28.50    1.35
  -4  10   0    6.75    0.62
  -4  10   0   12.17    1.07
  -3  10   0    1.46    0.48
  -3  10   0    1.89    0.63
  -2  10   0   23.63    1.30
  -2  10   0   21.07    1.02
  -1  10   0   37.39    1.56
  -1  10   0   37.29    1.28
   0 -10   0    6.89    0.62
   0  10   0    8.24    0.67
   0  10   0    8.25    0.81
  -1 -10   0    0.53    0.48
   1  10   0    0.34    0.57
  -2 -10   0    7.00    0.69
   2  10   0    7.21    0.79
  -3 -10   0   22.78    1.21
   3  10   0   21.62    1.25
  -4 -10   0    0.83    0.65
   4  10   0    0.61    0.59
  -5 -10   0   31.23    1.55
  -5 -10   0   30.72    1.28
  -6 -10   0    2.90    0.59
   6  10   0    1.72    0.69
  -7 -10   0    1.49    0.65
   7  10   0    1.25    0.72
  -8 -10   0   48.16    1.96
   8  10   0   46.14    1.84
  -9 -10   0   64.63    2.42
 -10 -10   0    1.77    0.95
 -11 -10   0    4.68    1.08
 -12 -10   0    0.85    1.11
 -13 -10   0    4.65    1.38
 -13  11   0    0.27    1.33
 -12  11   0   16.52    1.68
 -11  11   0    0.44    1.10
 -10  11   0   19.30    1.72
 -10  11   0   23.51    1.92
  -9  11   0   -0.82    0.85
  -9  11   0   -0.07    0.92
  -8  11   0    2.10    0.90
  -8  11   0    1.65    0.89
  -7  11   0   51.75    2.20
  -7  11   0   53.95    2.19
  -6  11   0   19.86    1.35
  -6  11   0   17.71    1.45
  -5  11   0    1.56    0.74
  -4  11   0    0.67    0.53
  -4  11   0    1.74    0.70
  -3  11   0   -1.05    0.58
  -3  11   0    0.26    0.47
  -2  11   0   23.60    1.06
  -2  11   0   21.18    1.32
  -1  11   0   15.17    0.88
  -1  11   0   16.30    1.18
   0 -11   0    6.03    0.65
   0  11   0    6.18    0.52
   0  11   0    6.13    0.76
  -1 -11   0    5.79    0.66
   1  11   0    6.12    0.80
  -2 -11   0    1.81    0.60
   2  11   0    3.08    0.69
  -3 -11   0    0.46    0.61
   3  11   0    0.26    0.63
  -4 -11   0   14.09    1.22
   4  11   0   16.27    1.26
  -5 -11   0   23.87    1.18
  -5 -11   0   23.06    1.49
  -6 -11   0    3.20    0.95
  -6 -11   0    1.87    0.61
   6  11   0    1.52    0.78
  -7 -11   0   -0.46    0.64
   7  11   0   -1.28    0.75
  -8 -11   0   20.76    1.46
   8  11   0   19.72    1.42
  -9 -11   0   11.38    1.13
 -10 -11   0    0.70    0.91
 -11 -11   0    1.91    1.02
 -12 -11   0    2.52    1.16
 -13 -11   0    0.93    1.27
 -12  12   0    2.39    1.27
 -11  12   0   13.28    1.53
 -10  12   0    3.95    1.17
 -10  12   0    4.52    1.10
  -9  12   0    1.21    0.99
  -9  12   0    1.32    1.03
  -8  12   0   15.58    1.36
  -8  12   0   17.54    1.57
  -7  12   0   17.82    1.67
  -7  12   0   24.52    1.57
  -6  12   0   29.93    1.81
  -6  12   0   32.89    1.86
  -5  12   0    5.13    0.96
  -4  12   0    0.60    0.58
  -4  12   0    1.01    0.76
  -3  12   0   -0.39    0.53
  -3  12   0    0.54    0.71
  -2  12   0    0.43    0.48
  -2  12   0   -0.26    0.66
  -1  12   0    0.56    0.64
  -1  12   0   -0.60    0.42
   0 -12   0    7.34    0.72
   0  12   0    7.84    0.90
   0  12   0    9.45    0.78
  -1 -12   0    8.83    0.79
   1  12   0    9.85    0.96
  -2 -12   0    2.89    0.66
   2  12   0    3.48    0.78
  -3 -12   0    0.65    0.68
   3  12   0    1.46    0.75
  -4 -12   0    1.37    0.79
   4  12   0    0.80    0.75
  -5 -12   0   28.40    1.31
  -5 -12   0   27.00    1.63
   5  12   0   27.68    1.64
  -6 -12   0   -0.78    0.93
  -6 -12   0    1.11    0.61
  -7 -12   0    0.68    1.02
  -7 -12   0   -1.06    0.64
   7  12   0   -0.30    0.82
  -8 -12   0   39.94    1.83
  -8 -12   0   38.25    2.18
   8  12   0   38.94    1.86
  -9 -12   0    0.69    0.83
 -10 -12   0   -0.63    0.89
 -11 -12   0    1.70    1.06
 -12 -12   0   -0.61    1.08
 -12  13   0    2.40    1.33
 -11  13   0    1.48    1.20
 -10  13   0   33.09    2.13
 -10  13   0   31.84    2.11
  -9  13   0   15.25    1.39
  -9  13   0   15.90    1.49
  -8  13   0   35.52    1.93
  -8  13   0   28.90    1.97
  -7  13   0    0.44    0.96
  -7  13   0    1.55    0.87
  -6  13   0    9.77    1.22
  -5  13   0    5.65    1.06
  -5  13   0    3.79    0.82
  -4  13   0    4.63    0.75
  -4  13   0    5.18    0.98
  -3  13   0    7.56    0.76
  -3  13   0    7.03    1.01
  -2  13   0   19.30    1.11
  -2  13   0   19.88    1.47
  -1  13   0   39.57    1.84
  -1  13   0   39.82    1.47
   0  13   0   15.72    1.45
  -1 -13   0    1.14    0.67
   1  13   0    1.73    0.81
  -2 -13   0   -0.33    0.65
   2  13   0    0.75    0.79
  -3 -13   0    4.01    0.85
   3  13   0    3.90    0.94
  -4 -13   0    6.73    1.00
   4  13   0    5.51    1.00
  -5 -13   0    2.36    0.68
  -5 -13   0    0.67    0.95
   5  13   0    1.31    0.93
  -6 -13   0    1.88    0.66
  -6 -13   0    2.75    1.06
  -7 -13   0    0.82    1.05
  -7 -13   0    0.13    0.70
   7  13   0   -1.45    0.87
  -8 -13   0   18.23    1.60
  -8 -13   0   18.21    1.46
   8  13   0   16.73    1.55
  -9 -13   0   -0.46    0.85
  -9 -13   0   -1.10    1.20
 -10 -13   0    0.47    1.27
 -11 -13   0    5.40    1.56
 -11  14   0   -1.15    1.12
 -10  14   0   -1.49    1.12
 -10  14   0    1.88    1.13
  -9  14   0    0.43    1.10
  -9  14   0    2.49    1.04
  -8  14   0   14.26    1.50
  -8  14   0   18.67    1.66
  -7  14   0    4.21    1.14
  -6  14   0   -0.14    0.98
  -5  14   0    0.18    0.75
  -5  14   0   -0.18    0.91
  -4  14   0    0.80    0.94
  -4  14   0    3.56    0.81
  -3  14   0   14.00    1.32
  -3  14   0   16.11    1.20
  -2  14   0   10.12    1.17
  -2  14   0    8.97    0.81
  -1  14   0   12.06    1.23
  -1  14   0   13.88    1.04
   0 -14   0    4.76    0.80
   0  14   0    3.48    0.94
  -1 -14   0    7.69    0.88
   1  14   0    7.28    1.06
  -2 -14   0    1.10    0.76
   2  14   0    1.15    0.94
  -3 -14   0    6.69    0.96
   3  14   0    7.50    1.14
  -4 -14   0    0.40    0.87
   4  14   0   -0.30    0.93
  -5 -14   0    7.70    1.15
   5  14   0    4.06    1.10
  -6 -14   0    0.72    1.04
   6  14   0    1.24    1.00
  -7 -14   0    0.69    1.10
  -8 -14   0    2.59    1.27
   8  14   0    2.14    1.04
  -9 -14   0    2.12    1.29
 -10 -14   0    1.19    1.36
 -11 -14   0    1.24    1.47
 -10  15   0   -0.45    1.11
 -10  15   0   -2.11    1.21
  -9  15   0    6.35    1.23
  -9  15   0    7.50    1.43
  -8  15   0    1.87    1.20
  -8  15   0    4.31    1.04
  -7  15   0    9.95    1.37
  -6  15   0    1.15    0.84
  -6  15   0   -0.18    1.04
  -5  15   0   -1.30    0.76
  -5  15   0   -2.10    0.96
  -4  15   0    1.17    1.02
  -4  15   0    0.31    0.72
  -3  15   0   -0.20    0.97
  -3  15   0    0.45    0.67
  -2  15   0    1.89    0.67
  -2  15   0    1.02    0.95
  -1  15   0   42.28    2.15
  -1  15   0   42.49    1.66
   0 -15   0    0.00    0.76
   0  15   0    0.42    0.97
  -1 -15   0    2.24    0.84
   1  15   0    1.72    1.01
  -2 -15   0   -0.60    0.81
   2  15   0   -0.13    0.97
  -3 -15   0    1.09    0.89
   3  15   0   -1.10    0.99
  -4 -15   0    6.68    1.07
   4  15   0    5.68    1.17
  -5 -15   0   -0.33    0.97
   5  15   0   -0.62    1.01
  -6 -15   0    2.67    1.14
   6  15   0    3.09    1.12
  -7 -15   0    0.32    1.17
  -8 -15   0    7.80    1.46
   8  15   0    8.05    1.25
  -9 -15   0   -0.95    1.30
 -10 -15   0    2.97    1.51
 -10  16   0   -1.96    1.32
 -10  16   0    1.16    1.14
  -9  16   0    5.04    1.43
  -9  16   0    4.21    1.17
  -8  16   0    5.39    1.36
  -7  16   0   11.57    1.52
  -6  16   0    0.21    1.13
  -6  16   0    2.00    0.92
  -5  16   0    6.37    1.29
  -5  16   0    5.84    0.99
  -4  16   0   -1.37    0.76
  -4  16   0   -0.57    1.03
  -3  16   0   -1.62    0.98
  -2  16   0    3.60    1.13
  -1  16   0    8.32    1.28
   0 -16   0    1.27    0.82
   0  16   0    0.91    1.04
  -1 -16   0    0.34    0.82
   1  16   0   -0.57    1.06
  -2 -16   0   -0.06    0.88
   2  16   0    0.34    1.04
  -3 -16   0    0.33    0.90
   3  16   0    0.15    1.11
  -4 -16   0    0.81    0.99
   4  16   0    0.24    1.12
  -5 -16   0    2.52    1.10
   5  16   0    1.85    1.16
  -6 -16   0    0.71    1.12
   6  16   0    2.73    1.19
  -7 -16   0    7.22    1.39
  -8 -16   0    0.41    1.32
  -9 -16   0    3.57    1.46
  -9  17   0   -2.02    1.30
  -8  17   0    9.42    1.57
  -7  17   0    8.29    1.51
  -6  17   0   -0.24    1.18
  -5  17   0    1.80    1.23
  -4  17   0    1.23    1.17
  -3  17   0    1.72    1.17
  -2  17   0    0.87    1.11
  -1  17   0    0.10    1.08
   0  17   0    4.06    1.27
  -1 -17   0    1.81    0.92
   1  17   0    1.11    1.18
  -2 -17   0   -0.87    0.91
   2  17   0   -0.79    1.12
  -3 -17   0    9.55    1.20
   3  17   0   11.02    1.48
  -4 -17   0    1.57    1.03
   4  17   0    0.12    1.20
  -5 -17   0    4.16    1.17
   5  17   0    1.04    1.25
  -6 -17   0    2.64    1.20
   6  17   0    1.02    1.18
  -7 -17   0   -0.54    1.26
   7  17   0   -0.92    1.22
  -8 -17   0    2.02    1.41
  -8  18   0   15.36    1.86
  -7  18   0    1.21    1.37
  -6  18   0    1.01    1.33
  -5  18   0   -0.02    1.26
  -4  18   0    0.06    1.19
  -3  18   0    2.53    1.29
  -2  18   0   -1.25    1.12
  -1  18   0    8.00    1.43
   0  18   0   -0.23    1.22
   1  18   0    0.95    1.22
  -2 -18   0    1.47    1.03
   2  18   0    0.10    1.20
  -3 -18   0    1.44    1.08
   3  18   0    0.71    1.27
  -4 -18   0    3.46    1.17
   4  18   0    4.03    1.37
  -5 -18   0    2.09    1.22
   5  18   0    3.36    1.38
  -6 -18   0    0.21    1.27
   6  18   0   -2.08    1.20
  -7 -18   0   -1.74    1.27
   7  18   0    1.32    1.34
  -6  19   0    9.27    1.70
  -5  19   0   -2.85    1.27
  -4  19   0   -0.90    1.31
  -3  19   0    1.64    1.35
  -2  19   0    6.04    1.45
  -1  19   0    1.03    1.34
   0  19   0    5.96    1.49
   1  19   0    1.07    1.32
   2  19   0    2.60    1.39
   3  19   0    8.31    1.56
  -4 -19   0    1.04    1.18
   4  19   0    3.15    1.44
  -5 -19   0    0.78    1.23
   5  19   0   -1.96    1.25
  -6 -19   0    0.61    1.34
   6  19   0   -0.41    1.42
  -5  20   0   -1.88    1.39
  -4  20   0    0.98    1.44
  -3  20   0   -0.40    1.41
  -2  20   0    4.13    1.50
  -1  20   0   -0.03    1.35
   0  20   0    6.33    1.59
   1  20   0   -0.94    1.32
   2  20   0    7.99    1.62
   3  20   0    0.89    1.41
   4  20   0    9.96    1.71
   5  20   0    2.21    1.50
  -2  21   0   -2.37    1.42
  -1  21   0   -1.19    1.45
   0  21   0   -1.25    1.40
   1  21   0   -1.25    1.46
   2  21   0    1.99    1.56
   4  20  -1    1.25    1.54
   3  20  -1   -0.37    1.45
   2  20  -1   -0.40    1.47
   1  20  -1   -0.10    1.44
   0  20  -1    3.53    1.49
  -1  20  -1    0.14    1.39
  -2  20  -1    3.88    1.56
  -3  20  -1    0.61    1.46
  -4  20  -1    2.10    1.50
   6  19  -1   -0.10    1.43
   5  19  -1    8.18    1.63
  -5 -19   1    7.66    1.50
   4  19  -1   -1.91    1.31
  -4 -19   1    0.55    1.25
   3  19  -1    3.34    1.45
   2  19  -1    0.03    1.36
   1  19  -1   -0.13    1.35
   0  19  -1   -1.42    1.29
  -1  19  -1    4.46    1.44
  -2  19  -1    0.38    1.35
  -3  19  -1    4.61    1.50
  -4  19  -1    0.25    1.35
  -5  19  -1    0.85    1.42
  -6  19  -1    0.27    1.42
   7  18  -1   -1.93    1.33
  -7 -18   1   -0.66    1.33
   6  18  -1    9.54    1.65
  -6 -18   1    7.99    1.50
   5  18  -1    3.90    1.42
  -5 -18   1    2.32    1.26
   4  18  -1    0.45    1.28
  -4 -18   1   -0.56    1.09
   3  18  -1    1.42    1.31
  -3 -18   1    0.60    1.10
   2  18  -1   -0.79    1.26
  -2 -18   1   -0.67    1.00
   1  18  -1   -0.32    1.26
   0  18  -1    9.05    1.54
  -1  18  -1    1.07    1.24
  -2  18  -1    3.42    1.34
  -3  18  -1   10.91    1.55
  -4  18  -1    6.71    1.48
  -5  18  -1    7.87    1.53
  -6  18  -1   -0.19    1.32
  -7  18  -1    5.63    1.60
  -8 -17   1   -0.16    1.38
   7  17  -1    0.88    1.33
  -7 -17   1    1.34    1.32
   6  17  -1    0.51    1.25
  -6 -17   1    0.04    1.18
   5  17  -1    7.42    1.44
  -5 -17   1    6.26    1.32
   4  17  -1    1.31    1.22
  -4 -17   1    1.58    1.09
   3  17  -1    1.92    1.24
  -3 -17   1    0.53    1.04
   2  17  -1    6.12    1.39
  -2 -17   1    7.39    1.15
   1  17  -1   -0.17    1.17
  -1 -17   1    0.34    0.96
   0  17  -1   -0.24    1.14
   0 -17   1   -0.24    0.92
  -1  17  -1   -0.13    1.12
  -2  17  -1    0.67    1.15
  -3  17  -1    0.81    1.16
  -4  17  -1    3.95    1.27
  -5  17  -1    2.20    1.26
  -6  17  -1   -2.43    1.18
  -7  17  -1    8.74    1.58
  -8  17  -1    0.79    1.37
  -9 -16   1    1.79    1.47
  -8 -16   1    4.53    1.44
  -7 -16   1   -0.22    1.22
   6  16  -1   -2.07    1.10
  -6 -16   1   -2.09    1.12
   5  16  -1    0.01    1.14
  -5 -16   1   -1.54    1.01
   4  16  -1   -0.05    1.12
  -4 -16   1    2.02    1.03
   3  16  -1   29.52    2.15
  -3 -16   1   29.65    1.87
   2  16  -1    1.49    1.17
  -2 -16   1    2.02    0.97
   1  16  -1   14.11    1.51
  -1 -16   1   16.94    1.54
   0  16  -1    0.91    1.11
   0 -16   1    1.93    0.88
  -1  16  -1    0.26    1.04
   1 -16   1    0.34    0.85
  -2  16  -1   14.73    1.50
  -3  16  -1    2.59    1.16
  -4  16  -1    4.01    1.18
  -5  16  -1   -1.13    1.06
  -6  16  -1   -0.66    1.12
  -7  16  -1    3.05    1.28
  -8  16  -1    0.57    1.30
  -9  16  -1   -0.69    1.31
 -10 -15   1   12.62    1.77
  -9 -15   1    9.30    1.63
  -8 -15   1    4.00    1.38
  -7 -15   1   20.20    1.69
   6  15  -1   -0.34    1.05
  -6 -15   1   -0.08    1.10
   5  15  -1    0.59    1.06
  -5 -15   1    1.62    1.06
   4  15  -1   -0.92    1.04
  -4 -15   1   -0.92    0.94
   3  15  -1   11.06    1.37
  -3 -15   1   10.20    1.15
   2  15  -1   -0.88    0.99
  -2 -15   1   -0.27    0.85
   1  15  -1   -0.87    0.97
  -1 -15   1    0.53    0.83
   0  15  -1    5.05    1.12
   0 -15   1    5.06    0.91
  -1  15  -1    3.33    1.06
   1 -15   1    2.25    0.84
  -2  15  -1   14.28    1.39
  -3  15  -1    0.80    0.98
  -4  15  -1   -0.06    0.99
  -4  15  -1    0.72    0.71
  -5  15  -1    0.80    0.82
  -5  15  -1   -0.73    1.02
  -6  15  -1    0.95    0.86
  -6  15  -1    0.41    1.10
  -7  15  -1    1.02    1.14
  -7  15  -1    2.13    0.93
  -8  15  -1    5.99    1.31
  -9  15  -1    0.28    1.21
  -9  15  -1   -0.11    1.02
 -10  15  -1    3.16    1.22
 -10  15  -1    6.29    1.44
 -11 -14   1   -0.31    1.40
 -10 -14   1    3.74    1.46
  -9 -14   1    2.88    1.31
   8  14  -1    1.07    1.11
  -8 -14   1    3.58    1.31
  -7 -14   1    5.97    1.34
   6  14  -1   -2.03    0.97
  -6 -14   1   -0.18    1.05
   5  14  -1    5.25    1.11
  -5 -14   1    4.84    1.10
   4  14  -1    3.07    1.07
  -4 -14   1    2.21    0.95
   3  14  -1   10.15    1.26
  -3 -14   1   10.39    1.08
   2  14  -1    0.47    0.95
  -2 -14   1   -0.07    0.81
   1  14  -1    0.60    0.93
  -1 -14   1   -0.02    0.78
   0  14  -1    0.56    0.92
   0 -14   1    2.71    0.81
  -1  14  -1   36.07    1.44
  -1  14  -1   39.88    2.03
   1 -14   1   36.39    1.65
  -2  14  -1   -1.77    0.87
  -2  14  -1    0.62    0.58
  -3  14  -1    0.04    0.62
  -3  14  -1    1.81    0.95
  -4  14  -1    0.11    0.97
  -4  14  -1    0.15    0.72
  -5  14  -1   -0.90    0.73
  -5  14  -1    0.96    0.99
  -6  14  -1   -0.83    0.99
  -6  14  -1    0.33    0.82
  -7  14  -1    9.85    1.38
  -8  14  -1    6.06    1.26
  -9  14  -1   -2.28    1.06
  -9  14  -1   -1.64    0.99
 -10  14  -1   -0.64    1.18
 -10  14  -1   -2.09    1.04
 -11  14  -1   -1.58    1.27
 -11  14  -1   -0.18    1.15
 -11 -13   1    1.60    1.43
 -10 -13   1    1.34    1.29
  -9 -13   1   23.25    2.08
   8  13  -1    0.68    0.93
  -8 -13   1   -0.40    1.11
   7  13  -1    0.05    0.88
  -7 -13   1   -0.59    1.06
  -6 -13   1   -0.04    1.01
   5  13  -1    6.44    1.08
  -5 -13   1    7.85    1.14
  -5 -13   1    6.24    0.75
   4  13  -1    4.18    1.02
  -4 -13   1    4.23    0.94
   3  13  -1    1.37    0.91
  -3 -13   1    1.58    0.80
   2  13  -1    3.31    0.90
  -2 -13   1    4.54    0.83
   1  13  -1    4.42    0.92
  -1 -13   1    3.64    0.77
   0  13  -1    0.63    0.77
   0 -13   1   -0.75    0.66
  -1  13  -1    8.21    1.02
  -1  13  -1    6.06    0.61
   1 -13   1    7.22    0.83
  -2  13  -1    2.83    0.88
  -2  13  -1    1.04    0.57
   2 -13   1    1.61    0.71
  -3  13  -1    8.39    0.79
  -3  13  -1   10.15    1.14
  -4  13  -1    9.03    1.15
  -4  13  -1    9.47    0.89
  -5  13  -1    0.69    0.95
  -5  13  -1    0.96    0.73
  -6  13  -1    0.57    0.99
  -6  13  -1   -0.22    0.77
  -7  13  -1   10.68    1.32
  -8  13  -1    5.22    1.01
  -8  13  -1    4.77    1.19
  -9  13  -1    1.74    1.10
  -9  13  -1    1.73    1.02
 -10  13  -1   10.98    1.38
 -10  13  -1    7.31    1.34
 -11  13  -1    0.12    1.26
 -11  13  -1   -0.14    1.20
 -12 -12   1    3.04    1.47
 -11 -12   1    3.43    1.41
 -10 -12   1    7.21    1.44
  -9 -12   1   22.07    1.99
  -9 -12   1   21.43    1.61
   8  12  -1    3.09    0.94
  -8 -12   1    1.23    1.14
  -8 -12   1    2.66    0.79
   7  12  -1    1.14    0.87
  -7 -12   1    0.84    0.67
  -7 -12   1    1.52    1.03
  -6 -12   1    5.85    0.73
  -6 -12   1    5.12    1.10
   5  12  -1   33.06    1.78
  -5 -12   1   34.85    1.82
  -5 -12   1   34.26    1.38
   4  12  -1   -0.61    0.78
  -4 -12   1   -0.02    0.76
   3  12  -1   10.91    1.06
  -3 -12   1    8.79    0.93
   2  12  -1    5.14    0.87
  -2 -12   1    3.39    0.73
   1  12  -1    9.61    0.96
  -1 -12   1   10.85    0.87
   0  12  -1   21.08    1.42
   0 -12   1   22.20    1.21
  -1  12  -1    6.18    0.87
  -1  12  -1    9.18    0.80
   1 -12   1    5.64    0.73
  -2  12  -1    2.34    0.76
  -2  12  -1    0.97    0.50
   2 -12   1    0.98    0.63
  -3  12  -1   27.59    1.60
  -3  12  -1   23.46    1.22
  -4  12  -1   12.38    1.09
  -4  12  -1   11.26    1.14
  -5  12  -1    2.64    0.94
  -5  12  -1    2.92    0.73
  -6  12  -1    2.21    0.95
  -7  12  -1   13.01    1.14
  -7  12  -1   11.55    1.29
  -8  12  -1    8.50    1.21
  -8  12  -1   10.54    1.19
  -9  12  -1   -0.91    0.93
  -9  12  -1   -1.01    0.96
 -10  12  -1    0.00    1.02
 -10  12  -1    0.38    1.03
 -11  12  -1    8.86    1.39
 -12  12  -1    3.27    1.32
 -12 -11   1    6.06    1.26
 -11 -11   1    1.88    1.05
 -10 -11   1    0.79    0.92
  -9 -11   1   -0.24    0.80
  -9 -11   1    2.86    1.23
   8  11  -1    2.17    0.85
  -8 -11   1    3.98    0.80
  -8 -11   1    1.87    1.11
   7  11  -1    7.56    0.99
  -7 -11   1    9.86    0.90
  -7 -11   1    7.85    1.22
   6  11  -1    1.91    0.82
  -6 -11   1    2.67    0.96
  -6 -11   1    2.76    0.64
  -5 -11   1    7.12    0.97
  -5 -11   1    5.66    0.61
   4  11  -1    4.91    0.85
  -4 -11   1    5.16    0.80
   3  11  -1    8.04    0.89
  -3 -11   1    8.05    0.83
   2  11  -1    3.80    0.75
  -2 -11   1    3.42    0.67
   1  11  -1    3.19    0.72
  -1 -11   1    2.87    0.62
   0  11  -1   12.81    1.14
   0 -11   1   13.51    0.99
  -1  11  -1    0.69    0.63
  -1  11  -1    0.46    0.40
  -2  11  -1   10.94    0.99
  -2  11  -1    9.52    0.82
   2 -11   1   11.75    0.94
  -3  11  -1    0.42    0.68
  -3  11  -1    0.62    0.50
  -4  11  -1    3.55    0.63
  -4  11  -1    3.09    0.80
  -5  11  -1    3.28    0.75
  -5  11  -1    3.57    0.87
  -6  11  -1    5.37    0.99
  -7  11  -1    0.44    0.89
  -7  11  -1    0.29    0.81
  -8  11  -1   23.85    1.76
  -8  11  -1   22.33    1.67
  -9  11  -1    0.23    0.95
  -9  11  -1    2.16    0.97
 -10  11  -1    5.06    1.18
 -10  11  -1    3.35    1.08
 -11  11  -1    2.97    1.24
 -12  11  -1   13.89    1.55
 -13 -10   1    2.26    1.32
 -12 -10   1   10.17    1.37
 -11 -10   1   -0.35    0.94
 -10 -10   1   -0.79    0.85
  -9 -10   1   24.94    1.62
   8  10  -1    4.00    0.83
  -8 -10   1    4.43    0.81
   7  10  -1    1.69    0.77
  -7 -10   1    1.63    0.66
  -7 -10   1    1.00    1.02
   6  10  -1    5.32    0.82
  -6 -10   1    3.59    0.62
  -6 -10   1    4.84    0.96
  -5 -10   1   18.28    0.98
  -5 -10   1   16.03    1.31
   4  10  -1   -0.91    0.59
  -4 -10   1    0.06    0.42
  -4 -10   1    0.28    0.64
   3  10  -1    0.00    0.59
  -3 -10   1   -0.59    0.57
   2  10  -1   16.88    1.13
  -2 -10   1   18.53    1.08
   1  10  -1    9.24    0.86
  -1 -10   1    9.89    0.76
   0  10  -1   30.76    1.46
   0  10  -1   31.53    1.07
   0 -10   1   29.97    1.25
  -1  10  -1    2.25    0.42
  -1  10  -1    1.55    0.61
   1 -10   1    1.36    0.53
  -2  10  -1    3.52    0.49
  -2  10  -1    3.36    0.71
   2 -10   1    4.33    0.58
  -3  10  -1    1.52    0.65
  -3  10  -1    2.99    0.54
  -4  10  -1    2.49    0.72
  -4  10  -1    2.82    0.56
  -5  10  -1    7.07    0.89
  -6  10  -1    8.02    0.87
  -6  10  -1    7.38    0.95
  -7  10  -1    3.40    0.84
  -7  10  -1    3.75    0.90
  -8  10  -1   21.35    1.58
  -8  10  -1   21.88    1.61
  -9  10  -1   -0.20    0.83
  -9  10  -1   -1.41    0.92
 -10  10  -1    4.96    1.04
 -10  10  -1    5.70    1.17
 -11  10  -1   -1.58    1.07
 -12  10  -1   -0.25    1.18
 -13  10  -1    9.37    1.58
 -13  -9   1    7.61    1.44
 -12  -9   1    0.10    1.12
 -11  -9   1    2.12    1.00
 -10  -9   1    0.89    0.87
  -9  -9   1    0.82    0.82
   8   9  -1   22.00    1.30
  -8  -9   1   24.61    1.46
   7   9  -1    0.62    0.65
  -7  -9   1    1.04    0.61
   6   9  -1    8.66    0.82
  -6  -9   1    7.37    0.69
  -6  -9   1    8.96    1.02
   5   9  -1    9.35    0.82
  -5  -9   1    8.64    0.79
  -5  -9   1    8.01    0.92
   4   9  -1   27.43    1.32
  -4  -9   1   27.93    1.38
  -4  -9   1   28.92    1.11
   3   9  -1    3.96    0.66
  -3  -9   1    4.15    0.66
   2   9  -1    4.55    0.67
  -2  -9   1    3.31    0.58
   1   9  -1   74.16    2.29
  -1  -9   1   71.03    2.05
   0   9  -1   -0.94    0.50
   0   9  -1    0.25    0.33
   0  -9   1   -0.49    0.46
  -1   9  -1   19.71    1.18
  -1   9  -1   21.48    0.87
   1  -9   1   20.39    1.01
  -2   9  -1    9.97    0.75
  -2   9  -1    8.14    0.81
   2  -9   1    9.48    0.82
  -3   9  -1   18.32    1.22
  -3   9  -1   21.70    1.02
  -4   9  -1   27.79    1.21
  -4   9  -1   26.95    1.37
  -5   9  -1   22.03    1.25
  -5   9  -1   16.40    0.98
  -6   9  -1   26.42    1.39
  -6   9  -1   26.75    1.44
  -7   9  -1    1.55    0.75
  -7   9  -1    0.55    0.75
  -8   9  -1   18.73    1.58
  -8   9  -1   19.27    1.46
  -9   9  -1    0.90    0.97
  -9   9  -1    0.93    0.81
 -10   9  -1   -0.02    0.83
 -10   9  -1    0.84    1.04
 -11   9  -1    6.67    1.32
 -12   9  -1    2.58    1.30
 -13   9  -1    0.79    1.34
 -14  -8   1   -0.75    1.32
 -13  -8   1    3.78    1.30
 -12  -8   1   -1.38    1.03
 -11  -8   1    5.04    1.11
 -10  -8   1   -0.23    0.85
  -9  -8   1   -0.50    0.77
   8   8  -1    7.00    0.75
  -8  -8   1    7.78    0.90
   7   8  -1    1.47    0.60
  -7  -8   1    1.44    0.61
   6   8  -1    0.33    0.54
  -6  -8   1    0.12    0.45
   5   8  -1    4.36    0.63
  -5  -8   1    3.84    0.51
  -4  -8   1    8.60    0.69
  -4  -8   1    7.74    0.82
   3   8  -1    8.41    0.75
  -3  -8   1   10.96    0.84
   2   8  -1   21.50    1.14
  -2  -8   1   20.83    1.07
   1   8  -1   11.06    0.95
  -1  -8   1   11.61    0.86
   0   8  -1    0.25    0.54
   0   8  -1    1.28    0.34
   0  -8   1    0.58    0.47
  -1   8  -1    0.68    0.56
  -1   8  -1    0.78    0.34
   1  -8   1    0.77    0.46
  -2   8  -1    0.96    0.42
  -2   8  -1    0.58    0.56
   2  -8   1    0.71    0.47
  -3   8  -1   -0.03    0.41
  -3   8  -1   -0.12    0.53
  -4   8  -1    0.26    0.54
  -5   8  -1   50.97    1.78
  -5   8  -1   51.90    1.85
  -6   8  -1   15.98    1.16
  -6   8  -1   16.94    1.17
  -7   8  -1   31.41    1.51
  -7   8  -1   30.58    1.57
  -8   8  -1   41.58    1.80
  -8   8  -1   44.44    1.98
  -9   8  -1    0.85    0.93
  -9   8  -1    0.66    0.75
 -10   8  -1    7.89    1.01
 -10   8  -1    9.41    1.26
 -11   8  -1    3.44    1.15
 -12   8  -1    0.64    1.17
 -13   8  -1   -0.28    1.28
 -14   8  -1    0.16    1.41
 -14  -7   1   -0.01    1.28
 -13  -7   1   22.32    2.10
 -12  -7   1    1.16    1.12
 -11  -7   1    0.13    0.98
 -10  -7   1   -1.94    0.80
  -9  -7   1    3.07    0.83
   8   7  -1    0.30    0.50
  -8  -7   1    0.55    0.65
   7   7  -1   22.09    1.05
  -7  -7   1   21.37    1.20
   6   7  -1    6.78    0.64
  -6  -7   1    7.29    0.65
   5   7  -1    1.76    0.50
  -5  -7   1    2.07    0.43
   4   7  -1   15.34    0.95
  -4  -7   1   16.14    1.12
  -4  -7   1   13.90    0.77
   3   7  -1   16.13    0.98
  -3  -7   1   15.67    1.06
   2   7  -1   58.57    1.82
  -2  -7   1   58.29    1.76
   1   7  -1   38.38    1.38
  -1  -7   1   38.50    1.27
   0   7  -1    0.73    0.27
   0   7  -1    0.17    0.45
   0  -7   1    0.37    0.39
  -1   7  -1    3.92    0.55
  -1   7  -1    4.55    0.39
   1  -7   1    5.35    0.50
  -2   7  -1   10.31    0.69
  -2   7  -1   10.85    0.88
   2  -7   1    9.68    0.73
  -3   7  -1   36.54    1.30
  -3   7  -1   36.92    1.44
  -4   7  -1    6.67    0.69
  -5   7  -1    0.35    0.51
  -5   7  -1    0.44    0.52
  -6   7  -1    2.17    0.59
  -6   7  -1    2.08    0.58
  -7   7  -1   17.82    1.13
  -7   7  -1   17.53    1.27
  -8   7  -1   -0.55    0.60
  -8   7  -1    0.93    0.71
  -9   7  -1   31.97    1.56
  -9   7  -1   31.68    1.80
 -10   7  -1   11.10    1.00
 -10   7  -1   10.37    1.23
 -11   7  -1   -0.78    1.00
 -12   7  -1    0.15    1.11
 -13   7  -1    2.29    1.31
 -14   7  -1    0.20    1.40
 -14  -6   1    4.98    1.44
 -13  -6   1   30.17    2.20
 -12  -6   1    3.71    1.18
 -11  -6   1    2.58    1.05
 -10  -6   1    3.08    0.94
  -9  -6   1    3.03    0.80
   8   6  -1   18.78    0.87
  -8  -6   1   15.75    1.25
   7   6  -1    5.73    0.55
  -7  -6   1    7.22    0.72
   6   6  -1   60.41    1.77
  -6  -6   1   57.97    1.87
   5   6  -1    0.16    0.43
  -5  -6   1    0.54    0.39
   4   6  -1    3.11    0.51
  -4  -6   1    3.53    0.44
  -3  -6   1   34.35    1.11
  -3  -6   1   35.88    1.34
   2   6  -1    2.52    0.44
  -2  -6   1    2.28    0.45
   1   6  -1    3.79    0.46
  -1  -6   1    3.63    0.43
   0   6  -1  108.87    2.88
   0   6  -1  107.21    2.67
   0  -6   1  107.78    2.66
  -1   6  -1   66.10    1.75
  -1   6  -1   66.09    1.94
   1  -6   1   67.08    1.75
  -2   6  -1   60.51    1.82
  -2   6  -1   58.42    1.66
  -3   6  -1   12.77    0.87
  -4   6  -1  162.23    4.21
  -4   6  -1  164.14    4.24
  -5   6  -1   14.08    0.94
  -5   6  -1   14.06    0.97
  -6   6  -1    3.57    0.61
  -6   6  -1    2.91    0.55
  -7   6  -1    0.08    0.57
  -7   6  -1    0.12    0.48
  -8   6  -1    4.80    0.82
  -8   6  -1    5.01    0.68
  -9   6  -1    1.53    0.84
  -9   6  -1    0.33    0.60
 -10   6  -1   11.35    1.26
 -10   6  -1   12.30    1.16
 -11   6  -1    4.30    1.17
 -12   6  -1   13.57    1.52
 -13   6  -1    1.92    1.32
 -14   6  -1   -0.20    1.35
 -14  -5   1    2.71    1.33
 -13  -5   1   13.60    1.56
 -12  -5   1   19.60    1.88
 -11  -5   1   12.22    1.30
 -10  -5   1    2.11    0.90
  -9  -5   1    2.98    0.78
  -8  -5   1   24.84    1.37
  -7  -5   1    4.19    0.64
   6   5  -1   34.68    1.16
  -6  -5   1   35.59    1.34
   5   5  -1    3.99    0.47
  -5  -5   1    4.25    0.52
   4   5  -1    6.45    0.52
  -4  -5   1    6.40    0.50
   3   5  -1    8.42    0.62
  -3  -5   1    8.05    0.51
  -2  -5   1   41.96    1.30
   1   5  -1   95.49    2.46
  -1  -5   1   88.68    2.30
   0   5  -1  163.55    3.94
   0   5  -1  160.14    4.10
   0  -5   1  167.38    3.86
  -1   5  -1   39.58    1.14
  -1   5  -1   40.81    1.30
   1  -5   1   40.28    1.16
  -2   5  -1  133.37    3.32
  -2   5  -1  132.22    3.42
  -3   5  -1    9.03    0.68
  -4   5  -1  225.74    5.48
  -4   5  -1  213.01    5.48
  -5   5  -1    0.40    0.51
  -5   5  -1    0.56    0.44
  -6   5  -1    7.59    0.65
  -7   5  -1   18.79    1.23
  -7   5  -1   19.30    1.02
  -8   5  -1   -0.48    0.65
  -8   5  -1    0.10    0.47
  -9   5  -1    8.59    1.03
  -9   5  -1   11.02    0.95
 -10   5  -1   -1.02    0.56
 -10   5  -1   -1.19    0.87
 -11   5  -1   24.78    1.98
 -12   5  -1   12.19    1.50
 -13   5  -1   17.97    1.76
 -14   5  -1    5.41    1.50
 -14  -4   1    4.62    1.41
 -13  -4   1    0.74    1.17
 -12  -4   1    9.31    1.34
 -11  -4   1    0.74    0.97
 -10  -4   1   46.28    2.11
  -9  -4   1    0.77    0.70
  -8  -4   1   35.01    1.54
  -7  -4   1    2.75    0.58
  -6  -4   1    3.88    0.57
   5   4  -1    2.22    0.39
  -5  -4   1    2.22    0.45
   4   4  -1    4.02    0.40
  -4  -4   1    4.75    0.43
   3   4  -1    8.80    0.54
  -3  -4   1    8.62    0.52
  -2  -4   1   83.87    2.19
   1   4  -1  985.92   23.23
  -1  -4   1 1000.00   22.20
   0   4  -1    1.52    0.25
   0   4  -1    1.07    0.41
   0  -4   1    1.28    0.24
   0  -4   1    0.68    0.40
  -1   4  -1    3.47    0.44
  -1   4  -1    4.05    0.33
   1  -4   1    4.35    0.40
  -2   4  -1  406.16    9.69
  -3   4  -1  132.27    3.38
  -3   4  -1  132.61    3.40
  -4   4  -1    4.34    0.48
  -4   4  -1    3.06    0.44
  -5   4  -1   54.39    1.76
  -5   4  -1   52.12    1.64
  -6   4  -1   25.34    1.06
  -6   4  -1   24.56    1.25
  -7   4  -1    0.65    0.41
  -7   4  -1   -0.09    0.53
  -8   4  -1    5.96    0.81
  -8   4  -1    5.67    0.58
  -9   4  -1   16.17    0.98
  -9   4  -1   17.55    1.42
 -10   4  -1   -0.19    0.53
 -10   4  -1   -0.55    0.83
 -11   4  -1   15.37    1.41
 -12   4  -1    1.98    1.13
 -13   4  -1   -0.02    1.21
 -14   4  -1    4.57    1.48
 -15  -3   1    3.06    1.47
 -14  -3   1    6.20    1.42
 -13  -3   1    1.59    1.18
 -12  -3   1    2.04    1.09
 -11  -3   1    0.02    0.92
 -10  -3   1    3.27    0.93
  -9  -3   1    2.25    0.79
  -8  -3   1   36.45    1.57
  -7  -3   1    4.02    0.61
  -6  -3   1   24.77    1.16
  -5  -3   1    3.90    0.50
   4   3  -1    7.58    0.46
  -4  -3   1    7.08    0.55
   3   3  -1   16.52    0.63
  -3  -3   1   16.08    0.67
   2   3  -1   67.95    1.83
  -2  -3   1   70.06    1.79
   1   3  -1   54.60    1.51
  -1  -3   1   54.35    1.50
   0   3  -1    9.62    0.62
   0  -3   1    8.40    0.58
   0  -3   1    8.53    0.36
  -1   3  -1   79.95    2.01
  -1   3  -1   79.75    2.12
   1  -3   1   79.59    1.96
  -2   3  -1  264.11    6.36
  -3   3  -1  245.76    5.80
  -3   3  -1  232.83    5.84
  -4   3  -1   53.43    1.52
  -4   3  -1   51.36    1.58
  -5   3  -1   18.57    0.84
  -5   3  -1   17.42    0.97
  -6   3  -1    8.54    0.71
  -6   3  -1   12.01    1.01
  -7   3  -1    3.39    0.46
  -8   3  -1   24.07    1.37
  -8   3  -1   23.37    1.00
  -9   3  -1    2.43    0.75
  -9   3  -1    2.24    0.47
 -10   3  -1    3.13    0.92
 -11   3  -1    8.64    1.22
 -12   3  -1    8.72    1.34
 -13   3  -1    1.97    1.26
 -14   3  -1    8.49    1.61
 -15   3  -1   -0.93    1.43
 -15  -2   1    6.17    1.63
 -14  -2   1    2.16    1.30
 -13  -2   1   13.28    1.55
 -12  -2   1    0.21    1.03
 -11  -2   1    0.11    0.92
 -10  -2   1    1.28    0.83
  -9  -2   1   10.17    1.00
  -8  -2   1   40.68    1.67
  -7  -2   1   69.62    2.20
  -6  -2   1  109.40    3.01
  -5  -2   1    7.09    0.56
  -4  -2   1    0.73    0.31
   3   2  -1   18.55    0.63
  -3  -2   1   19.82    0.77
   2   2  -1  145.63    3.53
  -2  -2   1  147.35    3.56
  -1  -2   1   10.40    0.49
  -1  -2   1   10.48    0.36
   0   2  -1    3.72    0.32
   0  -2   1    3.96    0.30
  -1   2  -1   12.07    0.50
  -1   2  -1   11.08    0.43
  -2   2  -1   96.38    2.40
  -2   2  -1   91.04    2.43
  -3   2  -1  108.57    2.87
  -3   2  -1  113.78    2.80
  -4   2  -1   38.23    1.27
  -4   2  -1   39.17    1.15
  -5   2  -1   18.56    0.96
  -5   2  -1   19.87    0.78
  -6   2  -1   17.42    1.11
  -6   2  -1   17.06    0.79
  -7   2  -1   42.03    1.56
  -7   2  -1   31.26    1.15
  -8   2  -1    4.96    0.48
  -8   2  -1    6.10    0.76
  -9   2  -1   35.37    1.74
 -10   2  -1    2.78    0.89
 -11   2  -1    1.95    0.97
 -12   2  -1    0.89    1.04
 -13   2  -1   15.64    1.59
 -14   2  -1    0.00    1.27
 -15   2  -1   11.23    1.78
 -15  -1   1    3.36    1.50
 -14  -1   1    4.72    1.42
 -13  -1   1    2.32    1.21
 -12  -1   1    0.73    1.08
 -11  -1   1    3.97    1.03
 -10  -1   1    0.41    0.80
  -9  -1   1   33.13    1.65
  -8  -1   1    5.87    0.77
  -7  -1   1   57.15    1.95
  -6  -1   1   46.89    1.65
  -5  -1   1   43.19    1.42
  -4  -1   1   24.22    0.91
  -3  -1   1    8.85    0.62
  -2  -1   1  125.75    3.08
   1   1  -1  102.45    2.38
   1   1  -1   94.78    2.37
  -1  -1   1  101.16    2.37
  -1  -1   1   97.37    2.31
  -1  -1   1   97.78    2.37
   0  -1   1  185.40    4.32
   0  -1   1  179.42    4.12
  -1   1  -1    2.01    0.17
   1  -1   1    1.66    0.14
  -2   1  -1   82.54    2.17
  -2   1  -1   89.46    2.14
  -3   1  -1    8.47    0.68
  -3   1  -1   10.56    0.59
  -4   1  -1   14.88    0.58
  -4   1  -1   12.36    0.72
  -5   1  -1    4.67    0.51
  -5   1  -1    5.19    0.45
  -6   1  -1   12.27    0.67
  -6   1  -1   14.08    1.01
  -7   1  -1    2.17    0.36
  -7   1  -1    1.70    0.60
  -8   1  -1   -0.41    0.55
  -9   1  -1    3.26    0.76
 -10   1  -1    3.73    0.86
 -11   1  -1    2.12    0.97
 -12   1  -1   -0.75    0.99
 -13   1  -1    1.95    1.19
 -14   1  -1    9.97    1.55
 -15   1  -1   -0.80    1.38
 -15   0   1    0.90    1.43
 -14   0   1   15.70    1.78
 -13   0   1    0.52    1.13
 -12   0   1    0.64    1.02
 -11   0   1    0.27    0.93
 -10   0   1   15.95    1.50
  -9   0   1   78.74    2.64
  -8   0   1   -0.36    0.54
  -7   0   1    3.94    0.64
  -6   0   1    0.22    0.51
  -5   0   1   12.90    0.82
  -4   0   1   18.31    0.83
  -3   0   1   18.28    0.84
  -2   0   1   13.63    0.53
   1   0  -1  254.64    5.84
  -1   0   1  239.20    5.83
  -1   0  -1  246.52    5.65
   1   0   1  233.48    5.68
  -2   0  -1   13.37    0.46
  -2   0  -1   13.50    0.53
  -3   0  -1   11.54    0.71
  -3   0  -1   12.61    0.57
  -4   0  -1   32.43    1.14
  -4   0  -1   34.12    0.95
  -5   0  -1    0.21    0.22
  -5   0  -1    1.18    0.39
  -6   0  -1   18.72    1.06
  -7   0  -1   32.04    1.41
  -8   0  -1   18.32    1.22
  -9   0  -1   11.47    1.01
 -10   0  -1    2.67    0.86
 -11   0  -1   -1.31    0.86
 -12   0  -1   -1.90    0.94
 -13   0  -1    0.29    1.12
 -14   0  -1   -0.38    1.23
 -15   0  -1    1.12    1.42
 -15   1   1   12.37    1.79
 -14   1   1    1.55    1.31
 -13   1   1    3.10    1.29
 -12   1   1    1.05    1.07
 -11   1   1    0.68    0.97
 -10   1   1   33.51    1.84
  -9   1   1    6.13    0.86
  -8   1   1    6.09    0.76
  -7   1   1    1.06    0.55
  -6   1   1    7.45    0.69
  -5   1   1    0.57    0.41
  -4   1   1    9.67    0.67
  -3   1   1   61.83    1.75
   2  -1  -1   41.92    1.03
  -2   1   1   40.89    1.16
   1  -1  -1    0.24    0.07
  -1   1   1    0.33    0.10
  -1   1   1    0.29    0.07
  -1  -1  -1  462.52   10.52
   1   1   1  439.06   10.52
  -2  -1  -1   15.30    0.51
  -2  -1  -1   16.30    0.59
  -3  -1  -1  602.74   14.44
  -3  -1  -1  634.97   14.68
   3   1   1  620.20   14.47
  -4  -1  -1    3.76    0.42
  -5  -1  -1  176.23    4.48
  -6  -1  -1    2.19    0.54
  -7  -1  -1    2.70    0.58
  -8  -1  -1   15.31    1.14
  -9  -1  -1    1.38    0.72
 -10  -1  -1   10.47    1.12
 -11  -1  -1    9.83    1.23
 -12  -1  -1    0.71    1.03
 -13  -1  -1    1.30    1.17
 -14  -1  -1    1.34    1.25
 -15  -1  -1   -0.14    1.38
 -15   2   1    1.57    1.45
 -14   2   1    0.27    1.28
 -13   2   1    1.72    1.21
 -12   2   1   10.12    1.36
 -11   2   1    1.63    0.95
 -10   2   1    9.61    1.11
  -9   2   1    5.09    0.83
  -8   2   1    2.19    0.64
  -7   2   1   21.42    1.23
  -6   2   1   38.27    1.49
  -5   2   1   14.68    0.55
  -5   2   1   14.39    0.84
  -4   2   1   35.86    1.00
  -4   2   1   36.70    1.22
  -3   2   1   21.63    0.73
  -3   2   1   22.67    0.93
  -2   2   1   69.78    1.87
  -2   2   1   72.85    1.79
  -1   2   1  107.56    2.57
  -1   2   1  104.87    2.59
   0  -2  -1  133.24    3.20
   0   2   1  134.29    3.20
   2   2   1  120.51    2.92
  -3  -2  -1   58.33    1.54
  -3  -2  -1   57.94    1.65
  -4  -2  -1  114.34    2.94
  -4  -2  -1  111.78    2.76
  -5  -2  -1  184.26    4.67
  -6  -2  -1    2.46    0.53
  -7  -2  -1    4.54    0.67
  -8  -2  -1    6.58    0.78
  -9  -2  -1   19.47    1.36
 -10  -2  -1    8.51    1.04
 -11  -2  -1   11.07    1.25
 -12  -2  -1    2.80    1.10
 -13  -2  -1    3.32    1.19
 -14  -2  -1   -0.83    1.21
 -15  -2  -1    0.95    1.46
 -15   3   1   -2.69    1.32
 -14   3   1    9.53    1.62
 -13   3   1    8.85    1.46
 -12   3   1   -0.09    1.03
 -11   3   1    0.13    0.94
 -10   3   1    4.46    0.97
  -9   3   1   -0.47    0.66
  -8   3   1    9.74    0.89
  -7   3   1   19.99    1.20
  -6   3   1    2.03    0.34
  -6   3   1    3.32    0.58
  -5   3   1    5.67    0.57
  -5   3   1    5.15    0.48
  -4   3   1    0.53    0.33
  -4   3   1    0.55    0.25
  -3   3   1  282.09    7.21
  -3   3   1  325.90    7.36
  -2   3   1    6.71    0.57
  -2   3   1    7.17    0.63
  -1   3   1   77.09    1.96
  -1   3   1   76.15    1.95
   0   3   1  392.00    9.24
   1   3   1  371.66    8.77
  -3  -3  -1   28.66    1.00
  -4  -3  -1    0.63    0.29
  -4  -3  -1    0.56    0.31
  -5  -3  -1    3.66    0.47
  -5  -3  -1    2.85    0.33
  -6  -3  -1    1.12    0.48
  -7  -3  -1   28.61    1.31
  -8  -3  -1   48.41    1.84
  -9  -3  -1    0.76    0.67
 -10  -3  -1    1.47    0.81
 -11  -3  -1   14.54    1.32
 -12  -3  -1   15.11    1.49
 -13  -3  -1   18.98    1.69
 -14  -3  -1    1.68    1.29
 -15  -3  -1   -0.36    1.36
 -15   4   1    5.82    1.56
 -14   4   1    2.75    1.35
 -13   4   1    2.44    1.29
 -12   4   1    1.55    1.08
 -11   4   1    1.29    0.99
 -10   4   1    1.04    0.91
  -9   4   1    9.76    1.03
  -8   4   1    5.53    0.79
  -8   4   1    5.75    0.50
  -7   4   1   67.63    1.90
  -7   4   1   68.17    2.25
  -6   4   1   40.66    1.56
  -6   4   1   38.51    1.26
  -5   4   1    0.23    0.44
  -5   4   1    0.60    0.34
  -4   4   1   49.85    1.55
  -4   4   1   50.74    1.45
  -3   4   1   74.25    1.96
  -3   4   1   71.95    2.02
  -2   4   1   12.84    0.72
  -2   4   1   12.27    0.71
  -1   4   1   12.41    0.74
   0   4   1  172.61    4.24
   1   4   1   34.32    1.14
   3   4   1   66.94    1.80
  -4  -4  -1    8.71    0.62
   4   4   1    7.45    0.51
  -5  -4  -1   50.31    1.61
  -6  -4  -1    9.84    0.65
  -6  -4  -1    9.76    0.89
  -7  -4  -1   57.56    1.95
  -8  -4  -1    0.69    0.58
  -9  -4  -1   23.87    1.46
 -10  -4  -1   44.28    2.01
 -11  -4  -1   22.94    1.81
 -12  -4  -1   12.68    1.42
 -13  -4  -1   10.77    1.44
 -14  -4  -1   -0.41    1.18
 -15  -4  -1    3.76    1.49
 -14   5   1    6.16    1.47
 -13   5   1   -0.10    1.11
 -12   5   1   -0.49    1.06
 -11   5   1   12.41    1.35
 -10   5   1    6.16    1.03
  -9   5   1    8.54    0.98
  -9   5   1    6.62    0.62
  -8   5   1    0.85    0.63
  -8   5   1    0.57    0.41
  -7   5   1   12.37    1.08
  -7   5   1   15.34    0.84
  -6   5   1    8.37    0.71
  -6   5   1    8.34    0.74
  -5   5   1   41.26    1.37
  -4   5   1    0.80    0.36
  -4   5   1    0.71    0.41
  -3   5   1  251.20    6.13
  -3   5   1  248.16    6.07
  -2   5   1   14.06    0.74
  -2   5   1   15.39    0.71
  -1   5   1   56.41    1.64
   0   5   1    5.61    0.49
   1   5   1   45.12    1.41
   2   5   1    4.89    0.45
  -4  -5  -1   11.39    0.74
   4   5   1   12.36    0.70
  -5  -5  -1   87.88    2.45
   5   5   1   85.61    2.32
  -6  -5  -1   38.98    1.44
  -7  -5  -1   15.38    1.06
  -7  -5  -1   15.45    0.78
  -8  -5  -1    7.74    0.81
  -9  -5  -1    0.51    0.70
 -10  -5  -1   50.59    2.17
 -11  -5  -1    0.78    0.93
 -12  -5  -1   20.40    1.85
 -13  -5  -1   -0.12    1.14
 -14  -5  -1    0.89    1.25
 -14   6   1    9.18    1.60
 -13   6   1    6.17    1.37
 -12   6   1   13.67    1.48
 -11   6   1    4.87    1.12
 -10   6   1    0.52    0.85
  -9   6   1   38.09    1.45
  -9   6   1   34.28    1.81
  -8   6   1   38.30    1.76
  -8   6   1   43.17    1.48
  -7   6   1    0.75    0.57
  -7   6   1    0.76    0.44
  -6   6   1    0.80    0.42
  -6   6   1    0.57    0.51
  -5   6   1  184.55    4.71
  -5   6   1  188.64    4.84
  -4   6   1   14.30    0.85
  -4   6   1   14.08    0.90
  -3   6   1   13.73    0.78
  -3   6   1   13.77    0.79
  -2   6   1   33.35    1.17
  -1   6   1   72.47    2.03
   0   6   1   62.95    1.81
   0   6   1   62.62    1.68
  -1  -6  -1   11.21    0.63
   1   6   1   10.08    0.67
   2   6   1    6.80    0.62
   4   6   1   10.21    0.75
  -5  -6  -1  152.08    3.97
   5   6   1  154.70    3.91
  -6  -6  -1    9.69    0.85
   6   6   1    9.55    0.75
  -7  -6  -1    7.65    0.73
  -7  -6  -1    9.16    0.77
  -8  -6  -1   -0.02    0.58
  -9  -6  -1    1.46    0.75
 -10  -6  -1    2.78    0.92
 -11  -6  -1    0.00    0.90
 -12  -6  -1    2.48    1.10
 -13  -6  -1    2.63    1.23
 -14  -6  -1   -0.15    1.25
 -14   7   1   12.27    1.73
 -13   7   1    0.28    1.22
 -12   7   1    9.81    1.43
 -11   7   1   -0.76    0.97
 -10   7   1    7.33    0.85
 -10   7   1    8.79    1.17
  -9   7   1   45.18    1.71
  -9   7   1   42.35    2.02
  -8   7   1    2.54    0.59
  -8   7   1    3.32    0.77
  -7   7   1   11.12    0.91
  -7   7   1    9.95    0.91
  -6   7   1   11.26    0.89
  -6   7   1   12.37    1.02
  -5   7   1   40.33    1.56
  -5   7   1   43.96    1.51
  -4   7   1  112.76    3.09
  -4   7   1  112.49    3.07
  -3   7   1    0.67    0.45
  -3   7   1    0.56    0.40
  -2   7   1    1.47    0.43
  -1   7   1    6.36    0.53
  -1   7   1    5.98    0.55
   0   7   1   26.78    0.91
   0   7   1   25.67    1.06
  -1  -7  -1    0.85    0.34
   1   7   1   -0.11    0.36
   2   7   1  145.04    3.76
   3   7   1   64.94    1.95
  -5  -7  -1   30.06    1.21
   5   7   1   28.74    1.19
  -6  -7  -1   15.05    0.99
   6   7   1   15.77    0.90
  -7  -7  -1    2.35    0.59
   7   7   1    2.19    0.51
  -8  -7  -1    1.11    0.54
  -8  -7  -1    2.28    0.70
  -9  -7  -1    4.15    0.83
 -10  -7  -1    4.74    0.99
 -11  -7  -1    0.93    0.97
 -12  -7  -1    4.09    1.15
 -13  -7  -1    3.96    1.27
 -14  -7  -1   -0.03    1.28
 -14   8   1    7.85    1.59
 -13   8   1    8.16    1.52
 -12   8   1    1.61    1.19
 -11   8   1    9.53    1.32
 -10   8   1   45.17    2.26
 -10   8   1   44.45    1.86
  -9   8   1    3.28    0.76
  -9   8   1    4.47    1.00
  -8   8   1    0.34    0.59
  -8   8   1    0.25    0.72
  -7   8   1   16.93    1.14
  -7   8   1   14.12    1.22
  -6   8   1    1.07    0.53
  -6   8   1    2.06    0.61
  -5   8   1   20.66    1.11
  -5   8   1   19.15    1.10
  -4   8   1   10.23    0.93
  -3   8   1    2.49    0.53
  -3   8   1    2.35    0.57
  -2   8   1    5.72    0.65
  -1   8   1    5.04    0.60
  -1   8   1    4.64    0.45
   0   8   1  104.64    2.75
   0   8   1  107.34    2.93
  -1  -8  -1    0.79    0.40
   1   8   1    0.20    0.46
  -2  -8  -1   64.80    1.88
   2   8   1   63.85    2.00
   3   8   1   11.35    0.93
  -5  -8  -1   18.47    1.01
   5   8   1   15.83    1.00
  -6  -8  -1    0.06    0.46
   6   8   1    0.75    0.51
  -7  -8  -1    1.90    0.60
   7   8   1    2.30    0.57
  -8  -8  -1    3.98    0.76
   8   8   1    4.45    0.64
  -9  -8  -1    8.73    1.02
 -10  -8  -1   11.90    1.20
 -11  -8  -1    2.55    1.04
 -12  -8  -1    9.77    1.30
 -13  -8  -1    3.58    1.27
 -14  -8  -1    3.63    1.41
 -13   9   1    1.29    1.32
 -12   9   1   16.57    1.66
 -11   9   1    3.15    1.13
 -10   9   1    2.37    0.86
 -10   9   1    3.91    1.09
  -9   9   1    2.49    0.79
  -9   9   1    2.37    0.96
  -8   9   1   -0.20    0.78
  -8   9   1   -0.72    0.64
  -7   9   1    3.98    0.75
  -7   9   1    5.05    0.83
  -6   9   1   31.84    1.46
  -6   9   1   30.73    1.50
  -5   9   1   52.18    1.87
  -5   9   1   53.00    1.86
  -4   9   1   28.25    1.33
  -4   9   1   28.91    1.26
  -3   9   1    4.32    0.65
  -2   9   1   13.09    0.83
  -2   9   1   12.80    1.01
  -1   9   1   13.10    0.81
  -1   9   1   12.98    1.00
   0   9   1   27.02    1.27
   0   9   1   27.01    1.04
  -1  -9  -1    7.74    0.60
   1   9   1    7.63    0.74
  -2  -9  -1    0.49    0.51
   2   9   1    0.36    0.55
  -3  -9  -1  110.04    2.94
   3   9   1  108.00    3.07
   4   9   1   11.10    0.98
   5   9   1    2.98    0.60
  -6  -9  -1   -0.12    0.46
   6   9   1   -0.47    0.53
  -7  -9  -1    7.83    0.78
   7   9   1    5.71    0.74
  -8  -9  -1    9.24    0.95
   8   9   1    8.47    0.82
  -9  -9  -1   63.56    2.40
 -10  -9  -1    4.27    1.01
 -11  -9  -1    5.77    1.15
 -12  -9  -1    8.59    1.28
 -13  -9  -1   25.37    2.15
 -13  10   1    4.70    1.40
 -12  10   1    0.26    1.16
 -11  10   1   11.06    1.44
 -10  10   1    4.01    0.93
 -10  10   1    4.16    1.12
  -9  10   1   14.16    1.20
  -9  10   1   12.57    1.29
  -8  10   1   11.79    1.10
  -8  10   1   11.91    1.17
  -7  10   1    3.87    0.85
  -7  10   1    2.33    0.77
  -6  10   1   19.45    1.32
  -6  10   1   21.03    1.34
  -5  10   1    2.99    0.64
  -5  10   1    3.00    0.71
  -4  10   1   84.42    2.49
  -4  10   1   83.48    2.62
  -3  10   1    8.46    0.70
  -2  10   1   68.52    2.04
  -2  10   1   68.40    2.21
  -1  10   1    1.06    0.55
  -1  10   1    1.62    0.45
   0  10   1   14.11    0.83
   0  10   1   14.61    1.05
  -1 -10  -1    1.06    0.47
   1  10   1    1.06    0.59
  -2 -10  -1    1.20    0.52
   2  10   1    0.48    0.56
  -3 -10  -1   14.00    1.06
   3  10   1   13.15    1.06
  -4 -10  -1    0.07    0.66
   4  10   1    0.15    0.57
  -6 -10  -1    0.05    0.51
   6  10   1    1.05    0.66
  -7 -10  -1   42.26    1.73
   7  10   1   44.37    1.76
  -8 -10  -1    1.16    0.74
   8  10   1   -0.18    0.73
  -9 -10  -1    0.10    0.81
 -10 -10  -1   34.09    1.89
 -11 -10  -1    3.67    1.10
 -12 -10  -1    2.83    1.14
 -13 -10  -1    3.67    1.29
 -13  11   1    1.22    1.39
 -12  11   1   -0.28    1.21
 -11  11   1    1.55    1.15
 -10  11   1   13.95    1.28
 -10  11   1   14.25    1.43
  -9  11   1    4.42    1.08
  -9  11   1    5.22    0.99
  -8  11   1    8.85    1.14
  -8  11   1    7.53    1.03
  -7  11   1   -0.75    0.75
  -7  11   1    0.17    0.78
  -6  11   1    7.03    0.90
  -6  11   1    9.87    0.99
  -5  11   1    5.40    0.82
  -4  11   1    2.96    0.70
  -3  11   1    0.99    0.59
  -3  11   1    1.57    0.51
  -2  11   1    1.92    0.62
  -2  11   1    1.71    0.46
  -1  11   1  105.99    3.10
  -1  11   1  102.38    2.83
   0  11   1   12.99    0.86
   0  11   1   12.00    1.07
  -1 -11  -1    5.41    0.61
   1  11   1    5.81    0.76
  -2 -11  -1   20.93    1.11
   2  11   1   22.10    1.27
  -3 -11  -1   34.65    1.48
   3  11   1   37.18    1.59
  -4 -11  -1    2.67    0.74
   4  11   1    0.98    0.67
  -5 -11  -1    2.89    0.84
   5  11   1    2.30    0.72
  -6 -11  -1   18.41    1.16
   6  11   1   16.26    1.31
  -7 -11  -1   34.60    1.63
   7  11   1   36.60    1.70
  -8 -11  -1    0.61    0.78
   8  11   1   -0.48    0.76
  -9 -11  -1   16.96    1.56
 -10 -11  -1    0.58    0.90
 -11 -11  -1    2.94    1.05
 -12 -11  -1    8.47    1.33
 -13 -11  -1   10.79    1.51
 -12  12   1    7.00    1.43
 -11  12   1    0.76    1.17
 -10  12   1    5.91    1.25
 -10  12   1    4.09    1.06
  -9  12   1    1.98    1.03
  -9  12   1   -1.05    0.90
  -8  12   1   32.99    1.93
  -8  12   1   33.86    1.89
  -7  12   1   30.63    1.76
  -7  12   1   31.63    1.82
  -6  12   1    2.34    0.80
  -6  12   1    2.83    0.90
  -5  12   1   12.28    1.04
  -5  12   1   11.03    1.08
  -4  12   1   24.39    1.50
  -3  12   1    0.55    0.55
  -3  12   1    1.43    0.70
  -2  12   1    0.27    0.46
  -2  12   1    1.43    0.66
  -1  12   1   21.04    1.03
  -1  12   1   20.29    1.31
   0  12   1    0.38    0.62
   0  12   1    0.35    0.44
  -1 -12  -1    0.54    0.53
   1  12   1   -0.08    0.63
  -2 -12  -1   36.80    1.47
   2  12   1   38.01    1.68
  -3 -12  -1    0.48    0.64
   3  12   1    0.43    0.69
  -4 -12  -1    1.24    0.74
   4  12   1   -0.60    0.70
  -5 -12  -1   15.06    1.20
   5  12   1   13.37    1.29
  -6 -12  -1   10.24    1.19
  -6 -12  -1    9.46    0.88
  -7 -12  -1   20.30    1.39
   7  12   1   22.58    1.54
  -8 -12  -1    1.61    0.80
   8  12   1    0.67    0.87
  -9 -12  -1   42.21    2.05
 -10 -12  -1    2.65    0.96
 -11 -12  -1    1.71    1.05
 -12 -12  -1    2.35    1.19
 -12  13   1    0.78    1.28
 -11  13   1    6.22    1.34
 -10  13   1    4.34    1.15
  -9  13   1    0.15    0.96
  -9  13   1    0.35    0.96
  -8  13   1   10.73    1.30
  -8  13   1   12.57    1.26
  -7  13   1   17.35    1.64
  -7  13   1   16.46    1.55
  -6  13   1    0.51    0.91
  -6  13   1    1.35    0.78
  -5  13   1   21.59    1.65
  -4  13   1   23.55    1.38
  -4  13   1   20.73    1.53
  -3  13   1    8.59    0.80
  -3  13   1    8.44    1.01
  -2  13   1   37.37    1.78
  -2  13   1   37.00    1.48
  -1  13   1    8.90    0.99
  -1  13   1    9.84    0.93
   0  13   1   -1.02    0.67
   0  13   1   -0.04    0.48
  -1 -13  -1    2.58    0.64
   1  13   1    2.26    0.80
  -2 -13  -1    0.24    0.62
   2  13   1   -0.02    0.73
  -3 -13  -1    2.36    0.75
   3  13   1    3.33    0.86
  -4 -13  -1   10.54    1.04
   4  13   1    9.59    1.10
  -5 -13  -1    5.41    0.98
   5  13   1    3.39    0.95
  -6 -13  -1   17.40    1.41
  -6 -13  -1   17.39    1.27
  -7 -13  -1    0.15    0.69
  -7 -13  -1   -0.09    1.08
   7  13   1    0.17    0.88
  -8 -13  -1   -0.72    1.16
  -8 -13  -1    1.01    0.79
   8  13   1   -0.38    0.89
  -9 -13  -1   15.40    1.28
 -10 -13  -1    4.13    1.01
 -11 -13  -1    2.38    1.10
 -12 -13  -1    1.26    1.23
 -11  14   1    3.47    1.25
 -10  14   1    8.48    1.36
 -10  14   1   14.44    1.45
  -9  14   1    4.46    1.12
  -9  14   1    3.55    1.16
  -8  14   1    8.96    1.19
  -8  14   1    8.57    1.31
  -7  14   1    0.17    1.00
  -7  14   1    0.07    0.83
  -6  14   1    2.22    1.02
  -5  14   1    6.63    1.11
  -4  14   1    7.13    0.91
  -4  14   1    6.46    1.07
  -3  14   1   -0.15    0.84
  -3  14   1   -0.45    0.60
  -2  14   1   26.93    1.69
  -2  14   1   27.87    1.38
  -1  14   1   35.80    1.48
  -1  14   1   39.19    1.91
   0  14   1   15.90    1.45
  -1 -14  -1    9.21    0.88
   1  14   1    9.32    1.08
  -2 -14  -1    0.03    0.69
   2  14   1    0.36    0.85
  -3 -14  -1   -0.39    0.79
   3  14   1    0.61    0.92
  -4 -14  -1    2.30    0.93
   4  14   1    0.17    0.95
  -5 -14  -1   10.93    1.21
   5  14   1    9.27    1.21
  -6 -14  -1    1.80    0.73
  -6 -14  -1    1.32    1.04
   6  14   1    1.48    0.98
  -7 -14  -1    1.85    1.15
  -7 -14  -1    4.23    0.82
  -8 -14  -1    4.05    1.29
  -8 -14  -1    3.88    0.90
   8  14   1    1.94    1.00
  -9 -14  -1    8.86    1.48
  -9 -14  -1   10.56    1.26
 -10 -14  -1    5.98    1.46
 -11 -14  -1    2.64    1.57
 -11  15   1   -0.88    1.15
 -10  15   1   -0.99    1.08
 -10  15   1   -1.34    1.16
  -9  15   1   -2.10    0.96
  -9  15   1   -0.18    1.15
  -8  15   1    2.51    1.16
  -8  15   1   -0.23    0.93
  -7  15   1   24.43    1.70
  -7  15   1   20.12    1.91
  -6  15   1    1.66    1.08
  -5  15   1    5.49    1.15
  -5  15   1    5.31    0.95
  -4  15   1   -0.08    0.94
  -4  15   1    0.16    0.73
  -3  15   1    7.55    0.88
  -3  15   1    9.86    1.24
  -2  15   1   35.34    2.00
  -2  15   1   38.66    1.62
  -1  15   1   30.52    1.44
  -1  15   1   31.21    1.92
   0  15   1   22.75    1.75
  -1 -15  -1    1.92    0.77
   1  15   1    1.80    0.98
  -2 -15  -1    0.17    0.77
   2  15   1    0.49    0.96
  -3 -15  -1   -0.17    0.83
   3  15   1    0.06    0.99
  -4 -15  -1   14.73    1.25
   4  15   1   12.11    1.35
  -5 -15  -1   32.28    1.91
   5  15   1   29.34    1.91
  -6 -15  -1    3.28    1.18
   6  15   1    3.41    1.10
  -7 -15  -1    4.32    1.23
  -8 -15  -1    4.24    1.32
   8  15   1    1.88    1.09
  -9 -15  -1    6.49    1.46
 -10 -15  -1   -2.53    1.30
 -10  16   1    0.10    1.30
 -10  16   1    1.09    1.16
  -9  16   1   -0.55    1.05
  -9  16   1    0.99    1.25
  -8  16   1    3.19    1.29
  -8  16   1    2.91    1.08
  -7  16   1    2.37    1.19
  -6  16   1   -1.19    1.05
  -5  16   1    1.14    0.86
  -5  16   1    0.86    1.07
  -4  16   1    1.66    1.10
  -4  16   1    0.85    0.78
  -3  16   1    1.73    1.05
  -3  16   1    0.65    0.76
  -2  16   1    5.65    1.17
  -2  16   1    5.10    0.80
  -1  16   1    1.00    0.66
  -1  16   1   -0.18    0.96
   0  16   1    1.56    1.03
  -1 -16  -1    2.03    0.85
   1  16   1    2.16    1.09
  -2 -16  -1   -0.74    0.81
   2  16   1   -1.06    1.00
  -3 -16  -1    3.23    0.95
   3  16   1    3.59    1.17
  -4 -16  -1    3.43    1.03
   4  16   1    3.83    1.19
  -5 -16  -1    2.04    1.09
   5  16   1    4.33    1.20
  -6 -16  -1    5.06    1.22
   6  16   1    3.45    1.18
  -7 -16  -1    1.54    1.26
  -8 -16  -1    6.94    1.46
   8  16   1    4.70    1.27
  -9 -16  -1    2.06    1.34
 -10 -16  -1    1.34    1.47
  -9  17   1    1.59    1.15
  -9  17   1    1.39    1.36
  -8  17   1    2.87    1.36
  -7  17   1    3.74    1.36
  -6  17   1    0.58    1.17
  -6  17   1    0.25    0.94
  -5  17   1    2.89    0.90
  -5  17   1    3.60    1.25
  -4  17   1    4.71    1.25
  -4  17   1    3.54    0.93
  -3  17   1   -0.46    1.09
  -2  17   1    5.73    1.27
  -1  17   1    2.94    1.15
   0  17   1   -0.58    1.04
  -1 -17  -1    0.35    0.84
   1  17   1    0.83    1.11
  -2 -17  -1    0.03    0.90
   2  17   1    0.56    1.12
  -3 -17  -1    5.06    1.04
   3  17   1    5.03    1.29
  -4 -17  -1    4.93    1.11
   4  17   1    4.43    1.31
  -5 -17  -1   10.28    1.34
   5  17   1   10.19    1.44
  -6 -17  -1    4.19    1.24
   6  17   1    5.17    1.32
  -7 -17  -1    9.59    1.47
   7  17   1   13.39    1.52
  -8 -17  -1    6.70    1.50
  -9 -17  -1   -0.32    1.40
  -8  18   1    0.50    1.40
  -7  18   1    0.88    1.32
  -6  18   1   -0.45    1.24
  -5  18   1    3.59    1.32
  -4  18   1    2.33    1.26
  -3  18   1    0.55    1.16
  -2  18   1    2.60    1.24
  -1  18   1    1.04    1.19
   0  18   1    2.10    1.22
   1  18   1    2.31    1.28
   2  18   1   -1.06    1.15
  -3 -18  -1    2.16    1.05
   3  18   1    1.59    1.28
  -4 -18  -1    0.24    1.03
   4  18   1   -1.23    1.21
  -5 -18  -1    1.60    1.14
   5  18   1    0.18    1.20
  -6 -18  -1    8.62    1.41
   6  18   1    9.66    1.54
  -7 -18  -1   -0.94    1.30
   7  18   1    0.36    1.25
  -8 -18  -1    0.86    1.37
  -7  19   1   11.21    1.80
  -6  19   1    0.47    1.37
  -5  19   1    0.47    1.31
  -4  19   1   -1.15    1.24
  -3  19   1   -0.42    1.24
  -2  19   1    1.13    1.25
  -1  19   1    2.11    1.32
   0  19   1    3.02    1.40
   1  19   1    0.53    1.28
   2  19   1    5.20    1.42
   3  19   1    2.29    1.40
  -4 -19  -1    0.18    1.19
   4  19   1   -0.08    1.34
  -5 -19  -1    0.78    1.21
   5  19   1    3.05    1.41
  -6 -19  -1    3.52    1.38
   6  19   1    4.27    1.49
  -7 -19  -1   -2.09    1.32
   7  19   1    0.98    1.40
  -5  20   1    0.15    1.44
  -4  20   1   -2.20    1.36
  -3  20   1   -0.22    1.38
  -2  20   1   -1.55    1.26
  -1  20   1    1.19    1.39
   0  20   1    4.63    1.47
   1  20   1    1.58    1.41
   2  20   1    0.42    1.42
   3  20   1    9.10    1.67
   4  20   1   -2.22    1.31
   5  20   1    2.04    1.50
  -3  21   1    0.09    1.44
  -2  21   1   -1.20    1.33
  -1  21   1   -1.33    1.42
   0  21   1   -1.28    1.39
   1  21   1   -1.51    1.40
   2  21   1    2.18    1.52
   3  21   1    2.53    1.56
   2  20  -2    1.61    1.52
   1  20  -2    1.71    1.49
   0  20  -2    4.59    1.63
  -1  20  -2    1.39    1.49
  -2  20  -2   -0.12    1.43
  -3  20  -2   -0.25    1.40
   5  19  -2    1.06    1.47
   4  19  -2    0.84    1.40
  -4 -19   2    0.24    1.32
   3  19  -2    0.66    1.42
  -3 -19   2    0.15    1.27
   2  19  -2   -2.44    1.34
   1  19  -2   -0.29    1.30
   0  19  -2   -1.03    1.31
  -1  19  -2   -0.37    1.34
  -2  19  -2    0.04    1.34
  -3  19  -2    2.83    1.42
  -4  19  -2    0.27    1.36
  -5  19  -2    1.82    1.50
   6  18  -2    9.80    1.65
  -6 -18   2   12.79    1.61
   5  18  -2    5.38    1.50
  -5 -18   2    5.12    1.41
   4  18  -2   -0.41    1.30
  -4 -18   2   -1.36    1.17
   3  18  -2    2.80    1.39
  -3 -18   2    3.73    1.23
   2  18  -2    2.71    1.36
  -2 -18   2   -1.05    1.05
   1  18  -2   -1.34    1.25
   0  18  -2    0.07    1.26
  -1  18  -2    0.10    1.23
  -2  18  -2    0.04    1.26
  -3  18  -2    0.25    1.29
  -4  18  -2    3.59    1.42
  -5  18  -2    0.92    1.36
  -6  18  -2   -0.78    1.34
  -7  18  -2    0.36    1.45
   7  17  -2   -0.92    1.33
  -7 -17   2   -2.23    1.27
   6  17  -2    0.25    1.31
  -6 -17   2    2.23    1.30
   5  17  -2   13.63    1.62
  -5 -17   2   16.17    1.55
   4  17  -2    3.71    1.35
  -4 -17   2    4.27    1.22
   3  17  -2    1.65    1.26
  -3 -17   2    0.57    1.10
   2  17  -2    0.32    1.20
  -2 -17   2   -0.76    0.98
   1  17  -2   -0.85    1.16
  -1 -17   2   -1.06    0.95
   0  17  -2   10.61    1.50
   0 -17   2   11.29    1.22
  -1  17  -2   -0.61    1.19
  -2  17  -2   -1.50    1.16
  -3  17  -2   11.43    1.56
  -4  17  -2   -0.89    1.15
  -5  17  -2    2.17    1.31
  -6  17  -2    7.31    1.50
  -7  17  -2    0.51    1.30
  -8  17  -2    1.01    1.43
  -9 -16   2    0.55    1.45
  -8 -16   2   -0.10    1.32
  -7 -16   2    3.14    1.36
   6  16  -2   -0.83    1.16
  -6 -16   2    0.19    1.17
   5  16  -2    0.22    1.12
  -5 -16   2    0.76    1.14
   4  16  -2    7.95    1.38
  -4 -16   2    6.80    1.20
   3  16  -2   36.42    2.28
  -3 -16   2   35.50    2.01
   2  16  -2    2.60    1.20
  -2 -16   2    1.56    1.04
   1  16  -2    0.27    1.12
  -1 -16   2    0.27    0.94
   0  16  -2    2.38    1.17
   0 -16   2    1.77    0.95
  -1  16  -2    1.13    1.14
   1 -16   2    1.05    0.92
  -2  16  -2    6.30    1.25
   2 -16   2    7.54    1.05
  -3  16  -2    2.40    1.17
  -4  16  -2    0.14    1.13
  -5  16  -2    4.32    1.30
  -6  16  -2    3.56    1.32
  -7  16  -2   -1.96    1.19
  -8  16  -2   -1.90    1.22
  -9  16  -2    3.55    1.46
  -9 -15   2   -0.96    1.36
  -8 -15   2    0.53    1.32
  -7 -15   2   11.69    1.50
   6  15  -2    1.70    1.16
  -6 -15   2    1.01    1.17
   5  15  -2    2.41    1.15
  -5 -15   2    2.72    1.11
   4  15  -2    4.59    1.21
  -4 -15   2    3.54    1.09
   3  15  -2    0.88    1.10
  -3 -15   2   -1.06    0.93
   2  15  -2   10.18    1.33
  -2 -15   2   10.86    1.16
   1  15  -2    0.04    1.04
  -1 -15   2   -0.21    0.85
   0  15  -2    0.25    1.03
   0 -15   2   -0.57    0.85
  -1  15  -2    4.89    1.17
   1 -15   2    5.74    0.99
  -2  15  -2    3.33    1.15
   2 -15   2    3.75    0.92
  -3  15  -2   -3.06    0.98
  -4  15  -2    1.37    1.09
  -5  15  -2    4.56    1.24
  -6  15  -2    2.29    1.21
  -7  15  -2    0.17    1.18
  -8  15  -2   10.68    1.56
  -8  15  -2    8.92    1.20
  -9  15  -2    6.73    1.47
 -10  15  -2   -0.37    1.33
 -10  15  -2   -1.03    1.12
 -10 -14   2    1.68    1.43
  -9 -14   2    4.14    1.42
  -8 -14   2    2.25    1.31
  -7 -14   2    5.88    1.34
   6  14  -2   10.48    1.36
  -6 -14   2    9.01    1.33
   5  14  -2    1.15    1.04
  -5 -14   2    0.64    1.01
   4  14  -2   -0.36    0.98
  -4 -14   2    0.44    0.96
   3  14  -2    3.28    1.07
  -3 -14   2    2.64    0.95
   2  14  -2   14.79    1.41
  -2 -14   2   16.28    1.25
   1  14  -2   -1.35    0.93
  -1 -14   2    0.62    0.83
   0  14  -2   38.49    2.15
   0 -14   2   39.99    1.80
  -1  14  -2   -2.17    0.90
   1 -14   2   -0.69    0.78
  -2  14  -2   27.49    1.84
   2 -14   2   25.50    1.57
  -3  14  -2    6.49    1.17
  -4  14  -2   -0.28    0.98
  -4  14  -2    0.05    0.71
  -5  14  -2   -1.20    1.01
  -5  14  -2    0.85    0.76
  -6  14  -2    5.51    0.92
  -6  14  -2    4.48    1.22
  -7  14  -2    0.62    1.10
  -7  14  -2   -0.02    0.84
  -8  14  -2    4.38    1.27
  -9  14  -2    1.79    1.25
 -10  14  -2   11.92    1.41
 -10  14  -2    9.56    1.50
 -11  14  -2    0.66    1.33
 -11 -13   2    0.57    1.37
 -10 -13   2    0.70    1.32
  -9 -13   2    1.47    1.26
  -8 -13   2    0.87    1.15
   7  13  -2    7.31    1.14
  -7 -13   2    6.76    1.29
  -6 -13   2    2.01    1.05
   5  13  -2    0.73    0.92
  -5 -13   2   -0.79    0.91
   4  13  -2    0.65    0.96
  -4 -13   2    2.53    0.93
   3  13  -2    9.74    1.18
  -3 -13   2   10.05    1.05
   2  13  -2   25.23    1.73
  -2 -13   2   25.73    1.54
   1  13  -2    4.02    0.99
  -1 -13   2    5.60    0.88
   0  13  -2   -0.08    0.80
   0 -13   2    0.37    0.73
  -1  13  -2    5.23    0.99
  -1  13  -2    3.91    0.55
   1 -13   2    4.97    0.83
  -2  13  -2    3.06    0.58
  -2  13  -2    3.79    0.97
   2 -13   2    2.93    0.81
  -3  13  -2   -0.01    0.59
  -3  13  -2    0.53    0.91
  -4  13  -2    6.81    0.82
  -4  13  -2    4.94    1.08
  -5  13  -2    0.77    0.98
  -5  13  -2   -1.54    0.68
  -6  13  -2   -0.12    0.99
  -6  13  -2    1.13    0.78
  -7  13  -2   -1.01    1.02
  -8  13  -2    0.06    1.09
  -9  13  -2    2.93    1.20
  -9  13  -2    4.52    1.09
 -10  13  -2    9.92    1.47
 -10  13  -2   12.17    1.44
 -11  13  -2    6.05    1.34
 -11  13  -2    7.09    1.41
 -11 -12   2    4.42    1.47
 -10 -12   2    9.70    1.50
  -9 -12   2    0.78    1.19
   8  12  -2    4.30    1.03
  -8 -12   2    6.23    1.24
   7  12  -2   18.36    1.54
  -7 -12   2   18.17    1.55
  -6 -12   2    2.18    1.03
   5  12  -2   -0.67    0.84
  -5 -12   2    1.04    0.92
  -5 -12   2    0.18    0.56
   4  12  -2    1.06    0.85
  -4 -12   2    0.54    0.45
  -4 -12   2   -0.02    0.82
   3  12  -2   10.14    1.11
  -3 -12   2   10.76    1.01
   2  12  -2    9.39    1.04
  -2 -12   2    8.14    0.90
   1  12  -2   14.97    1.35
  -1 -12   2   14.28    1.18
   0  12  -2    8.97    1.01
   0 -12   2   10.06    0.89
  -1  12  -2    7.88    0.97
  -1  12  -2    6.47    0.56
   1 -12   2    9.65    0.87
  -2  12  -2    2.86    0.53
  -2  12  -2    2.44    0.83
   2 -12   2    2.43    0.71
  -3  12  -2    1.39    0.59
  -3  12  -2    1.05    0.81
  -4  12  -2    2.14    0.64
  -4  12  -2    2.26    0.91
  -5  12  -2    0.53    0.70
  -5  12  -2    1.05    0.93
  -6  12  -2    0.21    0.94
  -6  12  -2    0.95    0.76
  -7  12  -2   20.82    1.76
  -8  12  -2    1.97    0.95
  -8  12  -2    1.86    1.06
  -9  12  -2   -0.82    0.93
  -9  12  -2   -0.61    1.02
 -10  12  -2    1.08    1.09
 -10  12  -2    0.43    1.09
 -11  12  -2    8.60    1.36
 -11  12  -2   10.57    1.43
 -12  12  -2   -0.51    1.23
 -12 -11   2   12.28    1.73
 -11 -11   2    5.53    1.45
 -10 -11   2    0.42    1.22
 -10 -11   2    0.85    0.93
  -9 -11   2   20.12    1.53
  -9 -11   2   20.37    1.74
   8  11  -2    5.35    0.96
  -8 -11   2    5.39    0.86
  -8 -11   2    5.93    1.21
   7  11  -2   36.50    1.77
  -7 -11   2   33.27    1.54
  -7 -11   2   32.56    1.97
   6  11  -2    2.89    0.89
  -6 -11   2    2.07    0.62
  -6 -11   2    2.75    1.00
  -5 -11   2    0.24    0.80
  -5 -11   2    0.36    0.48
   4  11  -2    4.60    0.86
  -4 -11   2    5.69    0.52
  -4 -11   2    5.91    0.88
   3  11  -2   -0.07    0.68
  -3 -11   2   -0.19    0.67
   2  11  -2    1.45    0.73
  -2 -11   2    0.62    0.63
   1  11  -2    0.00    0.66
  -1 -11   2    0.52    0.60
   0  11  -2    4.54    0.78
   0 -11   2    4.71    0.70
  -1  11  -2    1.94    0.41
  -1  11  -2    2.51    0.73
   1 -11   2    1.59    0.62
  -2  11  -2    4.83    0.52
  -2  11  -2    6.96    0.89
   2 -11   2    5.28    0.70
  -3  11  -2   20.46    1.42
  -3  11  -2   23.74    1.12
  -4  11  -2    0.74    0.77
  -4  11  -2    1.88    0.58
  -5  11  -2   10.75    0.93
  -5  11  -2   12.16    1.17
  -6  11  -2    2.06    0.93
  -7  11  -2   45.03    2.13
  -8  11  -2    7.99    1.07
  -8  11  -2    7.30    1.14
  -9  11  -2    1.59    0.98
  -9  11  -2   -0.69    0.97
 -10  11  -2    4.48    1.12
 -10  11  -2    5.13    1.14
 -11  11  -2    0.79    1.08
 -11  11  -2    0.40    1.11
 -12  11  -2    0.35    1.22
 -13 -10   2    6.88    1.53
 -12 -10   2   -1.83    1.34
 -12 -10   2    2.50    1.16
 -11 -10   2   11.80    1.31
 -11 -10   2   13.37    1.65
 -10 -10   2   22.13    1.99
 -10 -10   2   21.60    1.68
  -9 -10   2   13.98    1.46
  -9 -10   2   12.57    1.09
   8  10  -2    4.57    0.85
  -8 -10   2    3.39    1.14
  -8 -10   2    3.51    0.78
   7  10  -2   -0.16    0.75
  -7 -10   2    0.64    0.64
  -7 -10   2   -0.34    0.93
   6  10  -2   -0.92    0.67
  -6 -10   2   -0.47    0.52
  -6 -10   2    0.38    0.85
  -5 -10   2    0.69    0.44
  -5 -10   2    1.02    0.74
   4  10  -2    0.37    0.64
  -4 -10   2    0.01    0.66
  -4 -10   2    0.55    0.37
   3  10  -2    5.82    0.81
  -3 -10   2    5.17    0.76
   2  10  -2    0.11    0.60
  -2 -10   2    0.81    0.57
   1  10  -2   42.06    1.74
  -1 -10   2   42.66    1.55
   0  10  -2    6.78    0.81
   0 -10   2    5.51    0.66
  -1  10  -2    0.20    0.34
  -1  10  -2    0.58    0.65
   1 -10   2    0.45    0.54
  -2  10  -2    4.68    0.51
  -2  10  -2    4.90    0.77
   2 -10   2    4.69    0.64
  -3  10  -2   24.61    1.10
  -3  10  -2   25.35    1.40
  -4  10  -2    2.60    0.75
  -4  10  -2    1.62    0.56
  -5  10  -2    8.46    0.98
  -5  10  -2    9.39    0.87
  -6  10  -2   -0.22    0.76
  -7  10  -2   20.36    1.50
  -7  10  -2   18.43    1.54
  -8  10  -2    1.12    0.90
  -8  10  -2    0.53    0.91
  -9  10  -2    2.16    0.96
  -9  10  -2    1.32    0.98
 -10  10  -2    4.55    1.04
 -10  10  -2    3.62    1.12
 -11  10  -2   24.18    2.04
 -11  10  -2   22.38    2.00
 -12  10  -2    3.81    1.29
 -13  10  -2    1.67    1.35
 -13  -9   2   -1.06    1.20
 -12  -9   2    6.96    1.27
 -11  -9   2   15.76    1.43
 -10  -9   2   10.89    1.17
  -9  -9   2   14.49    1.39
   8   9  -2   48.89    1.84
  -8  -9   2   46.61    2.28
  -8  -9   2   50.26    1.96
   7   9  -2   19.06    1.27
  -7  -9   2   19.50    1.24
  -7  -9   2   21.97    1.62
   6   9  -2    0.84    0.64
  -6  -9   2    0.18    0.78
  -6  -9   2    0.60    0.50
   5   9  -2   38.41    1.56
  -5  -9   2   37.06    1.33
  -5  -9   2   38.19    1.65
   4   9  -2    0.29    0.56
  -4  -9   2    0.00    0.34
  -4  -9   2    0.74    0.63
   3   9  -2   32.60    1.44
  -3  -9   2   33.70    1.41
   2   9  -2   19.80    1.18
  -2  -9   2   18.00    1.07
   1   9  -2   84.90    2.53
  -1  -9   2   80.12    2.32
   0   9  -2    0.68    0.59
   0  -9   2    0.32    0.49
  -1   9  -2    8.47    0.80
  -1   9  -2    8.45    0.61
   1  -9   2    8.54    0.69
  -2   9  -2    1.27    0.59
  -2   9  -2    0.13    0.36
   2  -9   2    0.71    0.51
  -3   9  -2   28.86    1.16
  -3   9  -2   27.19    1.37
  -4   9  -2    3.51    0.59
  -4   9  -2    3.41    0.71
  -5   9  -2   19.88    1.29
  -5   9  -2   21.60    1.15
  -6   9  -2    1.19    0.69
  -6   9  -2    1.09    0.70
  -7   9  -2   10.35    1.07
  -7   9  -2    9.56    1.00
  -8   9  -2    3.54    0.92
  -8   9  -2    7.09    1.04
  -9   9  -2    9.71    1.14
 -10   9  -2   -0.29    0.83
 -10   9  -2   -0.42    1.01
 -11   9  -2   10.40    1.39
 -12   9  -2    4.25    1.34
 -13   9  -2   16.17    1.77
 -13  -8   2   -0.82    1.17
 -12  -8   2   11.87    1.41
 -11  -8   2    1.53    1.02
 -10  -8   2   -0.25    0.89
  -9  -8   2    1.10    0.79
   8   8  -2    4.50    0.70
  -8  -8   2    5.54    0.81
   7   8  -2    1.50    0.61
  -7  -8   2    1.09    0.58
   6   8  -2    2.37    0.59
  -6  -8   2    2.69    0.82
  -6  -8   2    1.66    0.53
   5   8  -2    0.46    0.55
  -5  -8   2    0.07    0.66
  -5  -8   2    1.32    0.43
  -4  -8   2   92.44    2.49
  -4  -8   2   95.29    2.71
   3   8  -2   76.93    2.33
  -3  -8   2   74.19    2.26
  -3  -8   2   78.91    2.05
   2   8  -2  105.99    3.01
  -2  -8   2  107.93    2.87
   1   8  -2  181.03    4.68
  -1  -8   2  177.42    4.38
   0   8  -2   22.06    1.21
   0  -8   2   23.22    1.09
  -1   8  -2   62.23    2.11
  -1   8  -2   65.17    1.76
   1  -8   2   64.98    1.88
  -2   8  -2   12.23    0.74
  -2   8  -2   10.89    1.00
   2  -8   2   12.14    0.89
  -3   8  -2   20.05    1.20
  -3   8  -2   18.85    0.95
  -4   8  -2   21.92    1.08
  -4   8  -2   21.76    1.23
  -5   8  -2    2.78    0.65
  -6   8  -2    8.72    0.86
  -6   8  -2    9.85    0.92
  -7   8  -2    6.13    0.84
  -7   8  -2    7.85    0.89
  -8   8  -2   17.29    1.37
  -8   8  -2   17.97    1.50
  -9   8  -2    2.06    0.86
  -9   8  -2    1.56    0.95
 -10   8  -2   10.51    1.30
 -10   8  -2   11.34    1.11
 -11   8  -2    2.08    1.13
 -12   8  -2   -0.36    1.15
 -13   8  -2   -0.22    1.28
 -14  -7   2    4.36    1.44
 -13  -7   2    3.59    1.26
 -12  -7   2    3.73    1.15
 -11  -7   2    2.52    1.04
 -10  -7   2   25.17    1.72
  -9  -7   2    1.68    0.81
   8   7  -2    0.69    0.54
  -8  -7   2    0.68    0.65
   7   7  -2    5.38    0.62
  -7  -7   2    5.14    0.68
   6   7  -2    9.87    0.83
  -6  -7   2    8.99    0.84
   5   7  -2   11.77    0.89
  -5  -7   2   13.20    0.81
  -5  -7   2   12.50    1.12
   4   7  -2    0.97    0.50
  -4  -7   2    1.10    0.35
  -4  -7   2    1.08    0.61
   3   7  -2    0.41    0.50
  -3  -7   2    0.23    0.29
  -3  -7   2    0.15    0.53
   2   7  -2   28.12    1.23
  -2  -7   2   29.90    1.21
   1   7  -2   69.16    2.10
  -1  -7   2   65.37    1.91
   0   7  -2   68.88    2.18
   0  -7   2   74.38    2.01
  -1   7  -2    4.34    0.38
  -1   7  -2    3.91    0.59
   1  -7   2    4.68    0.56
  -2   7  -2   11.72    0.96
  -2   7  -2   10.80    0.73
   2  -7   2   12.26    0.85
  -3   7  -2   14.27    1.04
  -3   7  -2   15.20    0.87
  -4   7  -2   20.67    1.14
  -4   7  -2   21.31    1.17
  -5   7  -2   26.93    1.26
  -5   7  -2   25.22    1.21
  -6   7  -2   13.49    1.05
  -6   7  -2   12.07    1.03
  -7   7  -2    5.00    0.76
  -7   7  -2    5.79    0.75
  -8   7  -2   14.03    1.17
  -9   7  -2   14.45    1.26
  -9   7  -2   11.91    1.23
 -10   7  -2    3.98    0.86
 -10   7  -2    3.23    1.06
 -11   7  -2   21.46    1.97
 -12   7  -2    0.63    1.17
 -13   7  -2    9.21    1.52
 -14   7  -2    1.07    1.40
 -14  -6   2    8.01    1.52
 -13  -6   2   -0.93    1.14
 -12  -6   2    5.29    1.20
 -11  -6   2    0.16    0.99
 -10  -6   2    3.69    0.99
  -9  -6   2    1.06    0.78
  -8  -6   2    0.67    0.62
   7   6  -2   13.88    0.86
  -7  -6   2   14.90    1.02
   6   6  -2   20.56    0.97
  -6  -6   2   20.96    1.06
   5   6  -2   52.80    1.64
  -5  -6   2   53.21    1.64
   4   6  -2   61.03    1.86
  -4  -6   2   62.14    1.76
  -4  -6   2   62.46    1.99
  -3  -6   2    0.88    0.53
  -3  -6   2    0.22    0.28
   2   6  -2    5.75    0.56
  -2  -6   2    4.61    0.54
   1   6  -2    0.61    0.40
  -1  -6   2    0.35    0.39
   0   6  -2    2.52    0.47
   0  -6   2    2.87    0.43
  -1   6  -2   14.31    0.59
  -1   6  -2   14.07    0.84
   1  -6   2   14.30    0.76
  -2   6  -2   18.87    0.97
  -2   6  -2   18.88    0.78
   2  -6   2   17.39    0.84
  -3   6  -2  211.37    5.39
  -3   6  -2  214.09    5.28
  -4   6  -2    2.95    0.59
  -5   6  -2    1.94    0.55
  -6   6  -2   10.67    0.98
  -6   6  -2   10.27    0.96
  -7   6  -2    5.30    0.77
  -7   6  -2    5.27    0.70
  -8   6  -2   16.43    1.15
  -8   6  -2   14.90    1.34
  -9   6  -2   -0.22    0.64
  -9   6  -2    0.29    0.86
 -10   6  -2    4.86    0.81
 -10   6  -2    3.32    1.08
 -11   6  -2    8.96    1.32
 -12   6  -2   19.18    1.70
 -13   6  -2    2.26    1.31
 -14   6  -2    8.27    1.61
 -14  -5   2   -1.46    1.25
 -13  -5   2    5.24    1.33
 -12  -5   2    1.07    1.08
 -11  -5   2    8.58    1.21
 -10  -5   2    6.23    1.07
  -9  -5   2    2.80    0.81
  -8  -5   2   13.47    1.16
  -7  -5   2   14.59    1.03
   6   5  -2    0.04    0.37
  -6  -5   2   -0.47    0.43
   5   5  -2   55.33    1.68
  -5  -5   2   59.43    1.76
   4   5  -2    2.23    0.46
  -4  -5   2    3.17    0.41
   3   5  -2    0.15    0.36
  -3  -5   2   -0.08    0.46
  -3  -5   2    0.08    0.24
   2   5  -2   13.25    0.72
  -2  -5   2   13.66    0.52
  -2  -5   2   14.54    0.77
   1   5  -2   35.95    1.21
  -1  -5   2   34.75    1.13
   0   5  -2   19.81    0.88
   0  -5   2   20.83    0.82
  -1   5  -2   11.71    0.75
  -1   5  -2   12.15    0.52
   1  -5   2   12.26    0.66
  -2   5  -2  138.22    3.59
  -2   5  -2  138.17    3.44
  -3   5  -2    6.83    0.60
  -3   5  -2    6.42    0.60
  -4   5  -2  188.29    4.72
  -4   5  -2  180.24    4.73
  -5   5  -2    1.97    0.54
  -5   5  -2    1.12    0.52
  -6   5  -2    4.93    0.66
  -6   5  -2    4.60    0.62
  -7   5  -2   25.86    1.40
  -7   5  -2   28.43    1.25
  -8   5  -2    0.53    0.53
  -8   5  -2    1.22    0.69
  -9   5  -2   35.05    1.84
  -9   5  -2   33.43    1.47
 -10   5  -2    0.32    0.66
 -10   5  -2    0.34    0.92
 -11   5  -2   26.40    2.00
 -12   5  -2    0.46    1.16
 -13   5  -2   18.67    1.80
 -14   5  -2    8.98    1.60
 -14  -4   2    2.22    1.31
 -13  -4   2   23.23    2.12
 -12  -4   2   -0.33    1.03
 -11  -4   2   12.05    1.28
 -10  -4   2    4.53    0.96
  -9  -4   2    0.27    0.72
  -8  -4   2    6.46    0.81
  -7  -4   2    9.01    0.75
   6   4  -2   15.26    0.72
  -6  -4   2   17.32    0.96
   5   4  -2   23.65    0.92
  -5  -4   2   26.56    1.07
   4   4  -2    0.83    0.33
  -4  -4   2   -0.07    0.30
   3   4  -2   23.40    0.87
  -3  -4   2   24.39    1.02
  -3  -4   2   24.42    0.80
  -2  -4   2    6.12    0.36
  -2  -4   2    5.56    0.50
   1   4  -2  292.50    7.00
  -1  -4   2  288.44    6.68
   0   4  -2  354.70    8.55
   0  -4   2  358.88    8.13
  -1   4  -2  167.84    3.87
  -1   4  -2  155.80    4.02
   1  -4   2  156.04    3.77
  -2   4  -2    4.97    0.49
  -2   4  -2    4.67    0.36
  -3   4  -2   37.10    1.26
  -4   4  -2  101.43    2.72
  -4   4  -2   99.53    2.71
  -5   4  -2    1.64    0.51
  -5   4  -2    2.03    0.50
  -6   4  -2    5.08    0.65
  -6   4  -2    3.97    0.55
  -7   4  -2   15.20    0.93
  -7   4  -2   13.32    1.09
  -8   4  -2    6.98    0.69
  -8   4  -2    7.18    0.85
  -9   4  -2    6.34    0.69
  -9   4  -2    6.35    0.96
 -10   4  -2    0.10    0.91
 -10   4  -2   -0.49    0.59
 -11   4  -2   34.98    2.14
 -12   4  -2   14.07    1.52
 -13   4  -2    2.40    1.31
 -14   4  -2   -0.28    1.34
 -14  -3   2    2.41    1.32
 -13  -3   2   13.08    1.53
 -12  -3   2    2.15    1.11
 -11  -3   2   -0.17    0.94
 -10  -3   2   14.86    1.25
  -9  -3   2    4.65    0.85
  -8  -3   2    0.38    0.60
  -7  -3   2    7.80    0.75
  -6  -3   2   12.38    0.92
  -5  -3   2   18.36    0.92
   4   3  -2   41.10    1.17
  -4  -3   2   40.47    1.26
   3   3  -2   52.61    1.46
  -3  -3   2   54.98    1.48
  -2  -3   2   22.51    0.69
  -2  -3   2   20.84    0.91
   1   3  -2    3.60    0.46
  -1  -3   2    4.08    0.48
   0   3  -2  546.75   12.92
   0  -3   2  548.51   12.33
  -1   3  -2   10.65    0.51
  -1   3  -2    9.76    0.74
   1  -3   2   10.48    0.71
  -2   3  -2  287.45    6.82
  -2   3  -2  280.45    6.85
  -3   3  -2  350.49    8.41
  -4   3  -2   63.77    1.78
  -4   3  -2   59.26    1.79
  -5   3  -2   21.61    0.96
  -5   3  -2   20.69    1.07
  -6   3  -2   57.21    1.81
  -6   3  -2   63.66    2.01
  -7   3  -2    1.20    0.45
  -7   3  -2    1.41    0.59
  -8   3  -2    2.57    0.68
  -8   3  -2    1.26    0.48
  -9   3  -2   11.07    0.91
  -9   3  -2    9.52    1.02
 -10   3  -2   10.40    0.96
 -10   3  -2   10.67    1.14
 -11   3  -2    1.82    1.02
 -12   3  -2    3.37    1.16
 -13   3  -2    0.79    1.21
 -14   3  -2   11.35    1.66
 -15   3  -2    1.62    1.51
 -15  -2   2    0.82    1.45
 -14  -2   2   39.37    2.53
 -13  -2   2    6.48    1.35
 -12  -2   2    7.23    1.29
 -11  -2   2    3.00    1.02
 -10  -2   2    4.80    0.98
  -9  -2   2   -0.86    0.67
  -8  -2   2    0.37    0.57
  -7  -2   2   27.74    1.29
  -6  -2   2   55.00    1.81
  -5  -2   2   18.90    0.93
  -4  -2   2   34.73    1.13
   3   2  -2    2.86    0.27
   2   2  -2  224.60    5.32
  -2  -2   2  221.32    5.33
  -2  -2   2  222.42    5.21
  -1  -2   2  241.89    5.55
   0   2  -2    4.37    0.38
   0  -2   2    4.49    0.38
  -1   2  -2   78.75    2.00
  -1   2  -2   84.51    2.13
   1  -2   2   79.33    2.00
  -2   2  -2   17.60    0.82
  -3   2  -2   36.39    1.13
  -3   2  -2   32.89    1.11
  -4   2  -2    0.43    0.29
  -4   2  -2    0.10    0.31
  -5   2  -2    0.66    0.43
  -5   2  -2    1.22    0.38
  -6   2  -2    6.54    0.56
  -6   2  -2    5.37    0.69
  -7   2  -2    0.60    0.56
  -7   2  -2    0.28    0.39
  -8   2  -2   29.89    1.14
  -8   2  -2   30.83    1.52
  -9   2  -2   11.62    0.84
  -9   2  -2   11.90    1.05
 -10   2  -2    2.45    0.88
 -11   2  -2    0.64    0.96
 -12   2  -2    1.56    1.05
 -13   2  -2    4.11    1.30
 -14   2  -2   21.09    1.93
 -15   2  -2    3.89    1.54
 -15  -1   2    1.50    1.47
 -14  -1   2   11.96    1.63
 -13  -1   2    1.23    1.19
 -12  -1   2    5.77    1.21
 -11  -1   2    2.71    1.03
 -10  -1   2    0.15    0.79
  -9  -1   2    2.36    0.75
  -8  -1   2    7.75    0.81
  -7  -1   2    0.09    0.51
  -6  -1   2   64.08    2.00
  -5  -1   2  121.32    3.21
  -4  -1   2  152.44    3.84
  -3  -1   2  125.37    3.15
   2   1  -2    2.28    0.28
  -2  -1   2    1.95    0.30
   1   1  -2  231.53    5.43
  -1  -1   2  231.74    5.24
  -1  -1   2  225.89    5.42
   0   1  -2  460.54   10.82
   0  -1   2  463.05   10.35
  -1   1  -2  158.46    3.85
  -1   1  -2  160.86    3.82
  -2   1  -2   60.50    1.64
  -2   1  -2   61.25    1.66
  -3   1  -2  139.04    3.54
  -3   1  -2  142.71    3.48
  -4   1  -2   94.05    2.58
  -4   1  -2  100.13    2.49
  -5   1  -2    4.68    0.41
  -5   1  -2    3.65    0.50
  -6   1  -2   13.37    0.98
  -6   1  -2   11.18    0.71
  -7   1  -2   45.87    1.37
  -7   1  -2   41.01    1.65
  -8   1  -2    0.30    0.58
  -8   1  -2    1.55    0.41
  -9   1  -2   43.62    1.91
  -9   1  -2   42.51    1.40
 -10   1  -2    7.28    1.03
 -11   1  -2    2.53    0.98
 -12   1  -2   -0.29    1.06
 -13   1  -2   16.20    1.62
 -14   1  -2    5.13    1.40
 -15   1  -2    4.11    1.49
 -15   0   2    4.66    1.53
 -14   0   2    9.62    1.61
 -13   0   2    5.17    1.30
 -12   0   2   14.79    1.51
 -11   0   2   10.06    1.23
 -10   0   2    3.97    0.91
  -9   0   2   40.21    1.80
  -8   0   2    2.43    0.63
  -7   0   2    0.64    0.55
  -6   0   2   16.36    1.05
  -5   0   2    4.33    0.50
  -4   0   2    6.93    0.61
  -3   0   2   38.74    1.21
  -2   0   2   19.28    0.72
   1   0  -2    7.23    0.31
   1   0  -2    6.71    0.31
  -1   0   2    7.49    0.31
  -1   0   2    6.80    0.31
  -1   0   2    7.41    0.35
   0   0   2   39.23    0.98
   0   0   2   40.11    0.98
  -1   0  -2    0.68    0.15
  -2   0  -2  170.15    4.18
  -2   0  -2  174.24    4.14
  -3   0  -2   30.62    1.09
  -3   0  -2   31.71    1.01
  -4   0  -2    0.50    0.25
  -4   0  -2    0.15    0.31
  -5   0  -2    5.52    0.54
  -5   0  -2    6.33    0.50
  -6   0  -2    0.48    0.32
  -6   0  -2    0.45    0.49
  -7   0  -2   12.74    0.68
  -7   0  -2   11.36    1.03
  -8   0  -2    2.11    0.39
  -8   0  -2    2.10    0.62
  -9   0  -2   35.33    1.70
 -10   0  -2   30.92    1.80
 -11   0  -2    3.93    1.01
 -12   0  -2   -0.23    0.98
 -13   0  -2    0.51    1.15
 -14   0  -2    3.14    1.31
 -15   0  -2   -0.58    1.35
 -15   1   2   13.16    1.82
 -14   1   2   -0.67    1.27
 -13   1   2    7.01    1.38
 -12   1   2   20.40    1.92
 -11   1   2   31.72    1.99
 -10   1   2    8.16    1.06
  -9   1   2    4.21    0.81
  -8   1   2   11.11    0.94
  -7   1   2    1.48    0.57
  -6   1   2    8.82    0.75
  -5   1   2    4.18    0.50
  -4   1   2   44.57    1.39
  -3   1   2  270.37    6.56
   2  -1  -2  252.55    5.81
   2  -1  -2  246.74    5.81
  -2   1   2  243.44    5.94
   1  -1  -2  263.65    5.85
  -1   1   2  258.02    6.11
  -1   1   2  259.24    6.18
   0  -1  -2   47.93    1.21
   0   1   2   46.66    1.20
   0   1   2   49.45    1.24
  -1  -1  -2    1.84    0.17
  -2  -1  -2   90.08    2.24
  -3  -1  -2   21.32    0.89
  -3  -1  -2   18.52    0.78
  -4  -1  -2   12.99    0.70
  -4  -1  -2   10.94    0.54
  -5  -1  -2  158.83    4.06
  -5  -1  -2  156.11    3.84
  -6  -1  -2    2.61    0.35
  -6  -1  -2    3.26    0.55
  -7  -1  -2    0.22    0.52
  -7  -1  -2    0.84    0.31
  -8  -1  -2    3.14    0.66
  -8  -1  -2    1.67    0.40
  -9  -1  -2    6.44    0.82
 -10  -1  -2   15.91    1.47
 -11  -1  -2    7.61    1.14
 -12  -1  -2    2.48    1.09
 -13  -1  -2   -0.69    1.07
 -14  -1  -2    0.64    1.25
 -15  -1  -2    0.82    1.41
 -15   2   2   -0.83    1.35
 -14   2   2    6.68    1.49
 -13   2   2    2.87    1.24
 -12   2   2   13.29    1.44
 -11   2   2    9.60    1.23
 -10   2   2    0.76    0.80
  -9   2   2    8.27    0.95
  -8   2   2    1.44    0.61
  -7   2   2    0.25    0.50
  -6   2   2   47.27    1.68
  -5   2   2   10.11    0.80
  -4   2   2   29.70    1.08
  -3   2   2   -0.70    0.33
  -3   2   2    0.81    0.23
  -2   2   2   54.86    1.41
  -2   2   2   53.70    1.51
  -1   2   2   37.30    1.03
  -1   2   2   38.19    1.01
   0   2   2   97.37    2.35
   0   2   2   95.03    2.34
  -1  -2  -2   -0.05    0.19
  -2  -2  -2  166.14    4.02
  -3  -2  -2   74.12    1.95
  -3  -2  -2   75.82    2.05
  -4  -2  -2   59.44    1.60
  -4  -2  -2   61.01    1.75
  -5  -2  -2    0.60    0.28
  -5  -2  -2    0.55    0.38
  -6  -2  -2    3.30    0.54
  -7  -2  -2   10.21    0.59
  -7  -2  -2   10.40    0.95
  -8  -2  -2  203.78    5.39
  -9  -2  -2   54.46    2.09
 -10  -2  -2    2.18    0.81
 -11  -2  -2    2.71    0.98
 -12  -2  -2    2.46    1.09
 -13  -2  -2    7.80    1.34
 -14  -2  -2    1.55    1.25
 -15  -2  -2    0.10    1.36
 -15   3   2    6.17    1.51
 -14   3   2    0.05    1.27
 -13   3   2    1.48    1.21
 -12   3   2    3.10    1.12
 -11   3   2    1.35    0.96
 -10   3   2    0.12    0.81
  -9   3   2    0.47    0.70
  -8   3   2    3.49    0.68
  -7   3   2    3.58    0.64
  -6   3   2   16.54    1.05
  -5   3   2   12.89    0.58
  -5   3   2   12.95    0.86
  -4   3   2    2.92    0.39
  -4   3   2    2.17    0.27
  -3   3   2   61.92    1.65
  -3   3   2   62.76    1.78
  -2   3   2   67.39    1.79
  -2   3   2   68.05    1.86
  -1   3   2   20.56    0.72
  -1   3   2   21.99    0.73
   0   3   2   10.84    0.49
   0   3   2   11.76    0.47
   1   3   2   59.24    1.57
  -3  -3  -2   10.75    0.65
  -4  -3  -2   27.37    0.91
  -4  -3  -2   28.52    1.02
  -5  -3  -2   92.18    2.52
  -5  -3  -2   88.70    2.32
  -6  -3  -2    1.39    0.35
  -6  -3  -2    1.18    0.50
  -7  -3  -2    0.40    0.48
  -8  -3  -2  224.05    5.85
  -9  -3  -2   29.47    1.56
 -10  -3  -2   21.67    1.57
 -11  -3  -2   -0.32    0.86
 -12  -3  -2    1.01    1.03
 -13  -3  -2    5.57    1.29
 -14  -3  -2    0.88    1.26
 -15  -3  -2   -0.82    1.36
 -15   4   2    2.90    1.49
 -14   4   2   14.72    1.71
 -13   4   2   28.69    2.18
 -12   4   2   19.62    1.89
 -11   4   2    9.43    1.24
 -10   4   2    0.23    0.81
  -9   4   2    4.08    0.81
  -8   4   2   14.91    1.18
  -7   4   2   -0.18    0.49
  -7   4   2   -0.27    0.30
  -6   4   2    5.95    0.47
  -6   4   2    4.31    0.66
  -5   4   2   12.58    0.66
  -5   4   2   12.48    0.89
  -4   4   2    5.56    0.48
  -4   4   2    5.50    0.51
  -3   4   2    1.04    0.30
  -3   4   2    0.33    0.34
  -2   4   2   13.33    0.74
  -2   4   2   14.10    0.72
  -1   4   2  881.36   20.48
  -1   4   2  868.13   20.59
   0   4   2   11.41    0.69
   0   4   2   10.00    0.63
   1   4   2    5.34    0.48
   3   4   2    0.87    0.31
  -4  -4  -2    8.03    0.66
  -4  -4  -2    7.53    0.58
  -5  -4  -2    4.24    0.45
  -5  -4  -2    4.34    0.52
  -6  -4  -2    0.69    0.46
  -6  -4  -2    0.60    0.37
  -7  -4  -2    3.40    0.59
  -7  -4  -2    3.35    0.41
  -8  -4  -2   -0.33    0.55
  -9  -4  -2   34.09    1.66
 -10  -4  -2    7.21    1.01
 -11  -4  -2    4.75    1.04
 -12  -4  -2    1.29    1.03
 -13  -4  -2    3.69    1.23
 -14  -4  -2    4.90    1.39
 -15  -4  -2   -1.21    1.32
 -14   5   2    0.06    1.28
 -13   5   2   -0.01    1.12
 -12   5   2    1.14    1.08
 -11   5   2   74.80    2.87
 -10   5   2   61.09    2.45
  -9   5   2    0.49    0.41
  -9   5   2   -0.51    0.65
  -8   5   2    3.84    0.49
  -8   5   2    4.19    0.71
  -7   5   2    8.34    0.78
  -7   5   2    7.40    0.68
  -6   5   2   47.93    1.48
  -6   5   2   47.40    1.72
  -5   5   2   10.21    0.78
  -5   5   2   10.05    0.73
  -4   5   2   -0.02    0.40
  -4   5   2    0.66    0.32
  -3   5   2  119.71    3.06
  -3   5   2  114.21    2.99
  -2   5   2   75.90    2.08
  -2   5   2   77.35    2.08
  -1   5   2  276.41    6.68
  -1   5   2  277.75    6.70
   0   5   2   71.76    1.99
   1   5   2   38.48    1.26
   2   5   2    2.18    0.37
   4   5   2   15.02    0.75
  -5  -5  -2    0.96    0.46
  -6  -5  -2   35.79    1.41
  -6  -5  -2   37.00    1.24
  -7  -5  -2   11.79    0.74
  -7  -5  -2   11.08    0.98
  -8  -5  -2    1.18    0.38
  -8  -5  -2    0.58    0.57
  -9  -5  -2    3.82    0.78
 -10  -5  -2   -0.12    0.80
 -11  -5  -2    7.45    1.14
 -12  -5  -2    2.09    1.05
 -13  -5  -2    4.00    1.23
 -14  -5  -2   -0.14    1.24
 -15  -5  -2   12.80    1.74
 -14   6   2    4.66    1.48
 -13   6   2    0.76    1.22
 -12   6   2    1.85    1.13
 -11   6   2    9.46    1.22
 -10   6   2    8.98    1.12
  -9   6   2    6.52    0.66
  -9   6   2    7.25    0.96
  -8   6   2    2.89    0.53
  -7   6   2    2.85    0.65
  -7   6   2    2.75    0.48
  -6   6   2    3.41    0.49
  -5   6   2   83.04    2.34
  -5   6   2   83.73    2.47
  -4   6   2   19.28    0.99
  -4   6   2   18.42    0.90
  -3   6   2   22.68    0.95
  -3   6   2   21.68    0.92
  -2   6   2    9.24    0.64
  -2   6   2    8.74    0.62
  -1   6   2  131.18    3.41
  -1   6   2  134.39    3.38
   0   6   2   18.11    0.85
   1   6   2   55.66    1.66
   2   6   2   90.99    2.45
   4   6   2    3.83    0.49
  -5  -6  -2    1.66    0.52
   5   6   2    0.62    0.45
  -6  -6  -2    7.77    0.70
  -6  -6  -2    8.81    0.67
  -7  -6  -2    8.07    0.76
  -7  -6  -2    9.31    0.79
  -8  -6  -2    0.00    0.43
  -8  -6  -2    0.46    0.60
  -9  -6  -2    3.41    0.82
 -10  -6  -2    2.07    0.89
 -11  -6  -2   -0.34    0.90
 -12  -6  -2    0.88    1.04
 -13  -6  -2    0.96    1.13
 -14  -6  -2    0.25    1.26
 -14   7   2   -0.85    1.32
 -13   7   2    1.17    1.28
 -12   7   2   15.73    1.58
 -11   7   2   15.43    1.47
 -10   7   2    1.88    1.00
  -9   7   2    7.61    0.77
  -9   7   2    8.28    1.06
  -8   7   2   55.78    1.84
  -8   7   2   53.04    2.12
  -7   7   2    3.70    0.70
  -7   7   2    3.92    0.58
  -6   7   2    9.17    0.81
  -6   7   2    8.93    0.82
  -5   7   2  115.72    3.22
  -5   7   2  115.69    3.13
  -4   7   2    8.64    0.83
  -4   7   2   10.06    0.90
  -3   7   2    1.02    0.43
  -3   7   2    1.41    0.42
  -2   7   2    4.70    0.50
  -2   7   2    3.99    0.44
  -1   7   2   13.85    0.79
   0   7   2   76.69    2.18
   1   7   2   10.20    0.71
   2   7   2  150.38    3.88
   3   7   2   -0.09    0.41
   5   7   2    2.87    0.52
  -6  -7  -2    0.13    0.46
   6   7   2   -0.12    0.46
  -7  -7  -2    0.43    0.52
  -7  -7  -2    0.59    0.52
  -8  -7  -2    0.99    0.53
  -8  -7  -2   -0.22    0.59
  -9  -7  -2   -1.50    0.67
  -9  -7  -2    0.20    0.53
 -10  -7  -2   -0.28    0.82
 -11  -7  -2   -1.49    0.91
 -12  -7  -2    0.36    1.02
 -13  -7  -2    0.77    1.13
 -14  -7  -2    1.09    1.28
 -14   8   2    1.23    1.42
 -13   8   2    1.27    1.29
 -12   8   2    5.39    1.31
 -11   8   2   -0.37    1.02
 -10   8   2   10.87    1.25
  -9   8   2   60.27    2.08
  -9   8   2   57.97    2.39
  -8   8   2   31.04    1.44
  -8   8   2   31.10    1.67
  -7   8   2    1.27    0.54
  -7   8   2    2.38    0.68
  -6   8   2   58.25    2.06
  -6   8   2   62.34    1.97
  -5   8   2   16.94    1.08
  -5   8   2   17.44    1.04
  -4   8   2   73.37    2.23
  -4   8   2   74.14    2.24
  -3   8   2   -0.56    0.46
  -3   8   2    0.53    0.47
  -2   8   2   28.51    1.21
  -2   8   2   27.79    1.10
  -1   8   2   11.75    0.85
   0   8   2    8.97    0.79
  -1  -8  -2    0.38    0.39
   1   8   2    0.88    0.47
   2   8   2   23.75    1.11
   3   8   2   18.31    1.06
   5   8   2   18.56    1.02
  -6  -8  -2   24.15    1.22
   6   8   2   26.71    1.16
  -7  -8  -2    7.74    0.78
   7   8   2    7.25    0.68
  -8  -8  -2    6.69    0.73
  -8  -8  -2    6.95    0.84
  -9  -8  -2    5.57    0.76
  -9  -8  -2    5.64    0.92
 -10  -8  -2    1.12    0.88
 -11  -8  -2    1.11    0.98
 -12  -8  -2    0.40    1.05
 -13  -8  -2   10.40    1.41
 -14  -8  -2    1.40    1.30
 -14   9   2   -0.70    1.38
 -13   9   2    1.16    1.29
 -12   9   2   10.70    1.46
 -11   9   2   11.14    1.40
 -10   9   2   -0.12    0.72
 -10   9   2    0.05    0.98
  -9   9   2   27.63    1.81
  -9   9   2   29.27    1.55
  -8   9   2   37.06    1.89
  -8   9   2   40.06    1.68
  -7   9   2    3.16    0.68
  -7   9   2    3.70    0.78
  -6   9   2    1.64    0.58
  -6   9   2    1.81    0.64
  -5   9   2    0.46    0.51
  -5   9   2    0.66    0.51
  -4   9   2   22.36    1.17
  -4   9   2   22.12    1.16
  -3   9   2    6.20    0.64
  -3   9   2    5.04    0.66
  -2   9   2    2.97    0.60
  -1   9   2   17.88    1.08
   0   9   2   20.17    0.94
   0   9   2   21.87    1.14
  -1  -9  -2    4.01    0.51
   1   9   2    3.32    0.61
  -2  -9  -2   36.37    1.35
   2   9   2   36.83    1.46
   3   9   2  136.35    3.69
   4   9   2    2.44    0.60
  -6  -9  -2    2.72    0.62
   6   9   2    2.90    0.62
  -7  -9  -2    3.18    0.67
   7   9   2    2.68    0.66
  -8  -9  -2    1.88    0.72
  -9  -9  -2   35.21    1.85
 -10  -9  -2    8.82    1.14
 -11  -9  -2   20.70    1.80
 -12  -9  -2    0.23    1.06
 -13  -9  -2   11.00    1.49
 -14  -9  -2    0.48    1.30
 -13  10   2    0.62    1.32
 -12  10   2    2.65    1.28
 -11  10   2    6.77    1.26
 -10  10   2    8.10    1.02
 -10  10   2    8.99    1.25
  -9  10   2   27.67    1.86
  -9  10   2   26.76    1.59
  -8  10   2   31.64    1.66
  -8  10   2   29.13    1.76
  -7  10   2   14.86    1.26
  -7  10   2   14.51    1.35
  -6  10   2    4.15    0.73
  -6  10   2    4.08    0.75
  -5  10   2   14.97    1.13
  -5  10   2   15.67    1.08
  -4  10   2   13.10    1.01
  -4  10   2   12.78    1.07
  -3  10   2   10.82    0.91
  -3  10   2   12.31    1.00
  -2  10   2   10.94    0.99
  -1  10   2   16.34    0.92
  -1  10   2   17.96    1.11
   0  10   2    0.69    0.42
   0  10   2    0.16    0.51
  -1 -10  -2   12.85    0.82
   1  10   2   13.69    1.04
  -2 -10  -2   15.38    0.97
   2  10   2   15.56    1.11
   3  10   2   34.79    1.49
   4  10   2   10.93    1.00
  -6 -10  -2    4.73    0.72
   6  10   2    3.79    0.71
  -7 -10  -2   10.22    0.92
   7  10   2   11.16    0.93
  -8 -10  -2    2.63    0.79
   8  10   2    2.94    0.77
  -9 -10  -2   11.86    1.14
 -10 -10  -2   32.45    1.91
 -11 -10  -2    1.08    1.01
 -12 -10  -2    0.64    1.12
 -13 -10  -2   -1.06    1.13
 -13  11   2   -2.00    1.25
 -12  11   2    0.03    1.19
 -11  11   2    1.12    1.15
 -10  11   2   12.09    1.38
 -10  11   2    9.72    1.13
  -9  11   2    3.19    1.04
  -9  11   2    3.79    0.91
  -8  11   2    8.73    1.04
  -8  11   2    8.10    1.10
  -7  11   2   29.18    1.61
  -7  11   2   29.55    1.67
  -6  11   2    4.10    0.81
  -6  11   2    5.75    0.85
  -5  11   2    1.01    0.67
  -5  11   2    0.05    0.58
  -4  11   2    1.09    0.56
  -4  11   2    0.59    0.62
  -3  11   2    5.70    0.75
  -3  11   2    2.95    0.47
  -2  11   2   56.53    1.96
  -2  11   2   51.54    1.72
  -1  11   2   89.71    2.74
  -1  11   2   88.62    2.51
   0  11   2    0.16    0.53
   0  11   2    0.05    0.43
   1  11   2   28.76    1.40
  -2 -11  -2   59.24    1.84
   2  11   2   58.91    2.05
  -3 -11  -2    2.08    0.66
   3  11   2    2.36    0.66
   4  11   2    3.51    0.72
   5  11   2    0.51    0.64
  -6 -11  -2   11.03    0.93
  -7 -11  -2    0.95    0.65
   7  11   2   -1.32    0.72
  -8 -11  -2   23.46    1.55
   8  11   2   25.45    1.52
  -9 -11  -2    1.31    0.84
 -10 -11  -2    2.56    0.99
 -11 -11  -2    6.94    1.17
 -12 -11  -2    3.86    1.21
 -13 -11  -2    2.40    1.27
 -12  12   2    0.34    1.30
 -11  12   2   -0.27    1.14
 -10  12   2    0.64    0.93
 -10  12   2   -0.73    1.02
  -9  12   2    4.88    1.03
  -9  12   2    3.19    1.03
  -8  12   2    6.46    1.04
  -8  12   2    6.86    1.08
  -7  12   2   10.54    1.13
  -7  12   2   10.64    1.12
  -6  12   2    0.58    0.78
  -6  12   2    0.79    0.76
  -5  12   2    5.78    0.82
  -5  12   2    5.53    0.88
  -4  12   2   -0.15    0.66
  -3  12   2    1.26    0.66
  -3  12   2    0.28    0.30
  -2  12   2    2.68    0.68
  -2  12   2    2.82    0.56
  -1  12   2    0.60    0.62
  -1  12   2    2.02    0.51
   0  12   2    8.59    0.87
   0  12   2    8.69    0.80
   1  12   2    0.91    0.64
  -2 -12  -2   -0.33    0.54
   2  12   2    0.16    0.63
  -3 -12  -2   11.15    0.90
   3  12   2    9.87    0.97
  -4 -12  -2    0.72    0.76
   4  12   2    0.79    0.71
   5  12   2   -0.79    0.74
  -7 -12  -2    0.37    0.69
   7  12   2    1.65    0.85
  -8 -12  -2    0.62    0.76
   8  12   2    1.65    0.86
  -9 -12  -2    3.25    0.92
 -10 -12  -2    3.34    0.99
 -11 -12  -2   -0.36    0.98
 -12 -12  -2    9.09    1.38
 -12  13   2    6.02    1.41
 -11  13   2    0.78    1.14
 -10  13   2   -1.22    0.96
 -10  13   2    0.64    1.06
  -9  13   2    0.80    1.00
  -9  13   2   -0.02    0.93
  -8  13   2   -0.33    0.92
  -8  13   2    1.68    0.94
  -7  13   2   14.76    1.34
  -7  13   2   15.68    1.29
  -6  13   2    2.50    0.93
  -6  13   2    1.70    0.82
  -5  13   2    6.37    0.87
  -5  13   2    7.41    1.03
  -4  13   2   19.65    1.49
  -3  13   2   44.34    1.92
  -2  13   2    5.75    0.89
  -2  13   2    6.02    0.70
  -1  13   2   29.32    1.31
  -1  13   2   30.08    1.59
   0  13   2    2.35    0.72
   0  13   2    2.59    0.56
   1  13   2   12.24    1.07
  -2 -13  -2    1.75    0.63
   2  13   2    1.33    0.74
  -3 -13  -2   -0.10    0.69
   3  13   2    0.90    0.79
  -4 -13  -2    3.10    0.84
   4  13   2    2.79    0.86
  -5 -13  -2    4.42    0.99
   5  13   2    4.67    0.93
  -6 -13  -2   14.30    1.34
  -7 -13  -2    3.38    0.80
   7  13   2    2.89    0.97
  -8 -13  -2   -1.24    0.75
   8  13   2   -0.75    0.86
  -9 -13  -2    2.58    0.93
 -10 -13  -2   -0.66    0.89
 -11 -13  -2    3.95    1.13
 -12 -13  -2    4.44    1.29
 -11  14   2    7.04    1.41
 -10  14   2    1.78    1.13
 -10  14   2    6.72    1.26
  -9  14   2    0.96    1.04
  -9  14   2    3.25    1.10
  -8  14   2    4.21    1.15
  -8  14   2    4.56    1.05
  -7  14   2   18.59    1.58
  -7  14   2   16.69    1.46
  -6  14   2    3.68    0.92
  -6  14   2    4.93    1.07
  -5  14   2    0.28    0.88
  -4  14   2   10.77    1.17
  -3  14   2    4.79    0.97
  -3  14   2    2.63    0.71
  -2  14   2   62.78    2.44
  -2  14   2   65.04    2.16
  -1  14   2    1.45    0.78
  -1  14   2    1.23    0.59
   0  14   2    0.77    0.77
   1  14   2    4.75    0.95
  -2 -14  -2    1.06    0.67
   2  14   2    0.56    0.83
  -3 -14  -2   -0.75    0.74
   3  14   2    0.87    0.87
  -4 -14  -2   -1.06    0.84
   4  14   2   -0.17    0.87
  -5 -14  -2    1.67    0.96
   5  14   2    0.13    0.93
  -6 -14  -2    0.05    1.03
   6  14   2   -0.27    0.90
  -7 -14  -2    2.69    1.12
  -7 -14  -2    2.11    0.80
  -8 -14  -2    5.11    0.95
   8  14   2    2.37    0.99
  -9 -14  -2    0.01    0.88
 -10 -14  -2    3.55    1.08
 -11 -14  -2   -0.52    1.01
 -11  15   2   -0.98    1.18
 -10  15   2    2.26    1.18
 -10  15   2   -0.37    1.15
  -9  15   2    6.06    1.30
  -9  15   2    4.46    1.15
  -8  15   2    8.03    1.30
  -8  15   2    6.74    1.14
  -7  15   2    5.33    1.20
  -7  15   2    5.52    1.08
  -6  15   2   27.37    1.71
  -6  15   2   26.61    1.95
  -5  15   2    0.66    0.98
  -4  15   2    1.27    0.83
  -4  15   2    0.82    0.96
  -3  15   2    5.74    0.85
  -3  15   2    5.55    1.08
  -2  15   2   49.28    2.22
  -2  15   2   49.35    1.89
  -1  15   2    9.65    0.87
  -1  15   2    7.78    1.11
   0  15   2    4.51    1.01
   1  15   2   11.08    1.22
  -2 -15  -2   -0.10    0.73
   2  15   2   -0.03    0.93
  -3 -15  -2    8.80    1.04
   3  15   2   12.29    1.31
  -4 -15  -2   -0.27    0.89
   4  15   2   -0.28    0.98
  -5 -15  -2    1.28    0.96
   5  15   2    0.40    0.98
  -6 -15  -2   -0.43    1.03
   6  15   2    1.67    1.01
  -7 -15  -2    0.21    0.75
  -7 -15  -2    1.34    1.15
  -8 -15  -2   17.84    1.67
  -8 -15  -2   18.15    1.57
   8  15   2   19.07    1.70
  -9 -15  -2    0.40    1.28
 -10 -15  -2   18.72    1.94
 -11 -15  -2    2.59    1.63
 -10  16   2    2.04    1.27
 -10  16   2    0.49    1.15
  -9  16   2    1.07    1.10
  -9  16   2    0.14    1.18
  -8  16   2    3.48    1.09
  -8  16   2    0.24    1.14
  -7  16   2   -0.44    1.10
  -7  16   2    0.88    0.94
  -6  16   2    0.53    1.09
  -5  16   2   -0.75    1.00
  -4  16   2    5.87    1.19
  -4  16   2    6.23    0.96
  -3  16   2    1.17    0.76
  -3  16   2    1.53    1.00
  -2  16   2   19.86    1.38
  -2  16   2   18.73    1.70
  -1  16   2    0.80    0.97
  -1  16   2    1.34    0.72
   0  16   2   30.88    1.95
   1  16   2    1.80    1.00
  -2 -16  -2    0.34    0.80
   2  16   2   -0.46    0.96
  -3 -16  -2   -0.34    0.84
   3  16   2   -1.15    1.03
  -4 -16  -2    7.85    1.13
   4  16   2    6.28    1.23
  -5 -16  -2   13.48    1.36
   5  16   2   15.08    1.49
  -6 -16  -2   11.51    1.36
   6  16   2   11.08    1.37
  -7 -16  -2    1.10    1.16
   7  16   2   -0.15    1.11
  -8 -16  -2    4.17    1.37
  -9 -16  -2    5.70    1.48
 -10 -16  -2    9.17    1.65
  -9  17   2   -0.80    1.28
  -9  17   2    2.73    1.18
  -8  17   2    7.80    1.28
  -8  17   2    6.63    1.45
  -7  17   2    6.60    1.41
  -6  17   2    2.58    1.22
  -5  17   2    2.99    1.23
  -5  17   2    3.37    0.95
  -4  17   2    1.77    1.12
  -4  17   2    2.28    0.85
  -3  17   2    0.47    0.77
  -3  17   2    0.29    1.05
  -2  17   2   23.94    2.02
  -2  17   2   27.07    1.53
  -1  17   2    1.26    1.05
  -1  17   2    0.80    0.72
   0  17   2    5.11    1.21
   1  17   2   -0.33    1.07
  -2 -17  -2    0.14    0.86
   2  17   2    0.52    1.09
  -3 -17  -2   -1.56    0.86
   3  17   2   -1.82    1.10
  -4 -17  -2   -0.08    0.95
   4  17   2    0.63    1.13
  -5 -17  -2    0.03    1.03
   5  17   2   -0.98    1.10
  -6 -17  -2    2.69    1.17
   6  17   2    2.23    1.18
  -7 -17  -2    4.51    1.29
   7  17   2    2.22    1.22
  -8 -17  -2   14.17    1.65
  -9 -17  -2    1.61    1.38
  -8  18   2    6.77    1.53
  -8  18   2    6.05    1.32
  -7  18   2   -1.85    1.23
  -6  18   2   -1.58    1.19
  -5  18   2    0.87    1.22
  -5  18   2   -0.93    0.88
  -4  18   2    0.76    1.19
  -3  18   2    2.92    1.23
  -2  18   2   -0.37    1.11
  -1  18   2    1.90    1.15
   0  18   2    0.76    1.17
   1  18   2    3.33    1.22
   2  18   2    0.45    1.20
  -3 -18  -2    5.39    1.08
   3  18   2    6.01    1.41
  -4 -18  -2    2.61    1.06
   4  18   2    2.81    1.26
  -5 -18  -2    1.13    1.09
   5  18   2   -0.99    1.20
  -6 -18  -2    3.53    1.26
   6  18   2    4.53    1.37
  -7 -18  -2   22.52    1.85
   7  18   2   22.91    2.15
  -8 -18  -2    8.84    1.59
  -7  19   2    2.54    1.45
  -6  19   2    2.47    1.37
  -5  19   2   -0.98    1.23
  -4  19   2    0.42    1.24
  -3  19   2   -0.65    1.21
  -2  19   2   -2.36    1.14
  -1  19   2   -0.09    1.17
   0  19   2    4.22    1.33
   1  19   2    3.03    1.32
   2  19   2    4.41    1.34
   3  19   2   -0.44    1.29
   4  19   2   -0.11    1.25
  -5 -19  -2   -2.58    1.07
   5  19   2   -0.65    1.28
  -6 -19  -2    1.33    1.27
   6  19   2    0.14    1.34
  -7 -19  -2    7.22    1.49
   7  19   2    4.99    1.47
  -6  20   2   -1.19    1.40
  -5  20   2   -2.24    1.27
  -4  20   2   -0.07    1.30
  -3  20   2   -0.68    1.32
  -2  20   2   -0.24    1.29
  -1  20   2    0.19    1.30
   0  20   2    1.30    1.33
   1  20   2   -0.50    1.29
   2  20   2    1.07    1.36
   3  20   2   -0.62    1.33
   4  20   2    0.69    1.38
   5  20   2    2.14    1.46
   6  20   2   -2.59    1.36
  -4  21   2    4.28    1.56
  -3  21   2   -2.70    1.34
  -2  21   2    3.72    1.50
  -1  21   2   -1.90    1.33
   0  21   2   -0.65    1.38
   1  21   2    0.35    1.45
   2  21   2    0.71    1.46
   3  21   2   -0.25    1.43
   4  21   2    1.25    1.50
   4  19  -3    1.15    1.44
   3  19  -3    2.13    1.47
  -3 -19   3   -1.33    1.28
   2  19  -3    0.66    1.45
   1  19  -3    0.29    1.37
   0  19  -3   -0.54    1.39
  -1  19  -3   -0.45    1.41
  -2  19  -3   -1.84    1.31
  -3  19  -3    2.41    1.48
  -4  19  -3   -3.21    1.34
   6  18  -3   -1.22    1.39
   5  18  -3    7.08    1.59
  -5 -18   3    6.93    1.50
   4  18  -3    0.21    1.35
  -4 -18   3   -2.67    1.23
   3  18  -3    1.89    1.38
  -3 -18   3   -1.83    1.17
   2  18  -3    0.84    1.31
  -2 -18   3   -1.33    1.11
   1  18  -3   -0.93    1.27
  -1 -18   3   -1.94    1.06
   0  18  -3   -0.96    1.27
  -1  18  -3    0.52    1.32
  -2  18  -3   -0.79    1.23
  -3  18  -3   -0.08    1.27
  -4  18  -3    2.36    1.37
  -5  18  -3    0.93    1.37
  -6  18  -3   -0.40    1.38
  -7 -17   3    3.34    1.46
   6  17  -3   10.55    1.63
  -6 -17   3   10.72    1.55
   5  17  -3    1.72    1.31
  -5 -17   3   -0.84    1.23
   4  17  -3    0.74    1.26
  -4 -17   3   -0.61    1.19
   3  17  -3    0.43    1.25
  -3 -17   3   -0.81    1.09
   2  17  -3    4.71    1.38
  -2 -17   3    4.99    1.21
   1  17  -3    0.26    1.21
  -1 -17   3    0.62    1.03
   0  17  -3    0.94    1.24
   0 -17   3    0.09    1.03
  -1  17  -3    9.54    1.49
   1 -17   3    8.72    1.22
  -2  17  -3   -0.99    1.19
  -3  17  -3   -0.43    1.23
  -4  17  -3   -0.58    1.27
  -5  17  -3   -0.90    1.26
  -6  17  -3    0.05    1.30
  -7  17  -3    8.03    1.63
  -8 -16   3   -0.16    1.38
  -7 -16   3    1.35    1.36
   6  16  -3    3.89    1.35
  -6 -16   3    3.57    1.34
   5  16  -3    2.12    1.26
  -5 -16   3   -0.04    1.15
   4  16  -3   22.24    2.04
  -4 -16   3   24.18    1.98
   3  16  -3    3.73    1.28
  -3 -16   3    2.59    1.13
   2  16  -3    2.15    1.26
  -2 -16   3    1.30    1.07
   1  16  -3    0.89    1.16
  -1 -16   3   -1.19    0.98
   0  16  -3   12.88    1.51
   0 -16   3   14.76    1.30
  -1  16  -3    4.40    1.27
   1 -16   3    3.54    1.03
  -2  16  -3    7.30    1.39
   2 -16   3    5.63    1.06
  -3  16  -3    7.15    1.41
  -4  16  -3   -0.83    1.15
  -5  16  -3    0.52    1.23
  -6  16  -3    5.05    1.40
  -7  16  -3    8.52    1.59
  -8  16  -3    1.08    1.36
  -9  16  -3    1.19    1.46
  -9 -15   3   -0.04    1.39
  -8 -15   3    0.05    1.34
  -7 -15   3    0.00    1.23
   6  15  -3    4.83    1.25
  -6 -15   3    9.33    1.38
   5  15  -3    0.39    1.09
  -5 -15   3    2.34    1.15
   4  15  -3   -0.37    1.11
  -4 -15   3   -0.12    1.04
   3  15  -3   22.61    1.84
  -3 -15   3   18.22    1.47
   2  15  -3    4.38    1.20
  -2 -15   3    3.89    1.09
   1  15  -3   11.07    1.45
  -1 -15   3   11.79    1.20
   0  15  -3    9.76    1.36
   0 -15   3    5.92    1.06
  -1  15  -3    5.63    1.23
   1 -15   3    4.06    1.02
  -2  15  -3    1.14    1.11
   2 -15   3    1.35    0.91
  -3  15  -3    2.21    1.15
  -4  15  -3    3.95    1.23
  -5  15  -3    0.17    1.10
  -6  15  -3    0.26    1.18
  -7  15  -3    2.65    1.28
  -8  15  -3    1.56    1.33
  -9  15  -3   -0.90    1.30
 -10 -14   3    4.44    1.51
  -9 -14   3    0.81    1.34
  -8 -14   3   -2.08    1.18
   7  14  -3   13.17    1.51
  -7 -14   3   14.05    1.53
   6  14  -3    5.78    1.33
  -6 -14   3    4.05    1.23
   5  14  -3    6.64    1.18
  -5 -14   3    3.31    1.11
   4  14  -3    1.08    1.05
  -4 -14   3    0.50    0.96
   3  14  -3   12.43    1.38
  -3 -14   3   10.33    1.19
   2  14  -3    1.79    1.06
  -2 -14   3    1.28    0.94
   1  14  -3    2.74    1.08
  -1 -14   3    3.61    0.96
   0  14  -3   -0.74    0.97
   0 -14   3    0.61    0.86
  -1  14  -3    6.32    1.20
   1 -14   3   10.42    1.06
  -2  14  -3    5.32    1.14
   2 -14   3    6.82    1.01
  -3  14  -3    0.28    1.00
  -4  14  -3    0.08    1.05
  -5  14  -3    4.83    1.21
  -6  14  -3    5.48    1.28
  -7  14  -3   -0.01    1.15
  -7  14  -3    3.51    1.04
  -8  14  -3    1.24    0.96
  -8  14  -3   -0.62    1.18
  -9  14  -3    1.27    1.24
 -10  14  -3    1.29    1.33
 -11 -13   3    1.58    1.51
 -10 -13   3    0.51    1.32
  -9 -13   3    0.37    1.28
  -8 -13   3    2.36    1.23
   7  13  -3    0.33    0.98
  -7 -13   3   -1.15    1.08
  -6 -13   3   14.27    1.40
   5  13  -3   -0.53    0.95
  -5 -13   3    1.02    1.00
   4  13  -3   -0.71    0.92
  -4 -13   3   -0.03    0.94
   3  13  -3   20.22    1.70
  -3 -13   3   19.53    1.56
   2  13  -3    0.70    0.96
  -2 -13   3    0.92    0.88
   1  13  -3   12.34    1.29
  -1 -13   3   13.68    1.12
   0  13  -3   18.99    1.67
   0 -13   3   21.16    1.44
  -1  13  -3    1.50    0.96
   1 -13   3    2.44    0.87
  -2  13  -3   32.73    1.92
   2 -13   3   34.78    1.72
  -3  13  -3    9.87    1.21
  -4  13  -3    0.83    0.68
  -4  13  -3   -1.51    0.92
  -5  13  -3    1.70    1.08
  -5  13  -3    3.16    0.79
  -6  13  -3   -1.77    0.97
  -6  13  -3   -0.56    0.79
  -7  13  -3    3.50    1.20
  -7  13  -3    6.76    0.99
  -8  13  -3   -0.83    1.10
  -9  13  -3    2.04    1.21
 -10  13  -3    6.64    1.40
 -10  13  -3    9.64    1.38
 -11  13  -3    1.06    1.29
 -11  13  -3    4.18    1.32
 -11 -12   3    5.67    1.51
 -10 -12   3    1.76    1.26
  -9 -12   3    2.32    1.26
  -8 -12   3    1.27    1.17
   7  12  -3    2.78    0.98
  -7 -12   3    3.96    1.16
  -6 -12   3    4.36    1.07
   5  12  -3    2.09    0.94
  -5 -12   3    2.26    1.00
   4  12  -3    9.88    1.15
  -4 -12   3    8.80    1.09
   3  12  -3   47.94    2.08
  -3 -12   3   48.28    1.97
   2  12  -3    1.33    0.83
  -2 -12   3    1.53    0.79
   1  12  -3    2.08    0.86
  -1 -12   3    2.66    0.78
   0  12  -3    8.53    1.03
   0 -12   3    9.10    0.93
  -1  12  -3    2.30    0.86
   1 -12   3    2.41    0.77
  -2  12  -3    3.42    0.53
  -2  12  -3    4.88    0.99
   2 -12   3    5.28    0.85
  -3  12  -3    7.83    0.73
  -3  12  -3    8.14    1.08
  -4  12  -3    6.88    1.11
  -4  12  -3    7.29    0.78
  -5  12  -3    7.68    0.87
  -5  12  -3    6.54    1.15
  -6  12  -3   -0.11    0.76
  -6  12  -3   -1.05    0.96
  -7  12  -3    4.73    0.94
  -7  12  -3    3.83    1.16
  -8  12  -3    4.47    1.17
  -9  12  -3    2.32    1.02
  -9  12  -3    2.38    1.13
 -10  12  -3    2.90    1.13
 -10  12  -3    2.69    1.24
 -11  12  -3    1.68    1.17
 -11  12  -3    1.56    1.22
 -12 -11   3    8.33    1.64
 -11 -11   3    0.05    1.30
 -10 -11   3    2.38    1.30
  -9 -11   3    1.03    1.14
  -8 -11   3   24.35    1.91
   7  11  -3    2.06    0.88
  -7 -11   3    1.83    1.05
   6  11  -3    1.26    0.87
  -6 -11   3    2.44    0.99
  -5 -11   3    0.23    0.85
   4  11  -3    0.68    0.78
  -4 -11   3   -0.19    0.38
  -4 -11   3   -0.23    0.78
   3  11  -3    1.79    0.77
  -3 -11   3   -0.32    0.70
   2  11  -3   -0.27    0.71
  -2 -11   3    0.13    0.66
   1  11  -3    0.27    0.70
  -1 -11   3    1.33    0.67
   0  11  -3    0.62    0.70
   0 -11   3   -0.59    0.61
  -1  11  -3    0.01    0.69
   1 -11   3    0.39    0.62
  -2  11  -3    2.88    0.82
  -2  11  -3    1.87    0.44
   2 -11   3    2.79    0.71
  -3  11  -3   12.82    1.14
  -3  11  -3   13.21    0.94
  -4  11  -3    0.55    0.59
  -4  11  -3    1.77    0.84
  -5  11  -3    8.38    0.85
  -5  11  -3    9.17    1.12
  -6  11  -3    3.10    0.80
  -6  11  -3    2.90    1.01
  -7  11  -3    0.94    0.98
  -8  11  -3   13.72    1.30
  -8  11  -3   13.95    1.39
  -9  11  -3    0.42    1.03
  -9  11  -3   -0.46    0.95
 -10  11  -3   -0.91    1.02
 -10  11  -3   -0.61    1.02
 -11  11  -3    3.59    1.22
 -11  11  -3    2.46    1.19
 -12  11  -3    2.61    1.30
 -12 -10   3   -1.25    1.34
 -11 -10   3    1.48    1.24
 -10 -10   3    0.46    0.92
 -10 -10   3    0.24    1.16
  -9 -10   3    1.67    1.11
  -9 -10   3    0.03    0.80
  -8 -10   3   -0.44    0.97
  -8 -10   3    0.12    0.69
   7  10  -3    5.52    0.89
  -7 -10   3    4.06    1.05
  -7 -10   3    5.07    0.73
   6  10  -3   12.15    1.08
  -6 -10   3   11.03    0.98
  -6 -10   3   11.10    1.20
  -5 -10   3    1.11    0.78
  -5 -10   3    0.04    0.43
   4  10  -3    4.73    0.81
  -4 -10   3    3.77    0.44
  -4 -10   3    5.93    0.85
   3  10  -3    3.23    0.75
  -3 -10   3    3.32    0.74
   2  10  -3   10.14    0.94
  -2 -10   3    9.64    0.85
   1  10  -3   20.23    1.28
  -1 -10   3   18.07    1.16
   0  10  -3    0.46    0.63
   0 -10   3    0.35    0.59
  -1  10  -3    5.93    0.83
   1 -10   3    7.80    0.78
  -2  10  -3    7.32    0.88
  -2  10  -3    7.51    0.70
   2 -10   3    5.81    0.73
  -3  10  -3    8.96    0.80
  -3  10  -3    9.18    0.96
  -4  10  -3    1.87    0.56
  -4  10  -3    2.90    0.79
  -5  10  -3    0.64    0.78
  -5  10  -3    1.89    0.64
  -6  10  -3    5.74    0.82
  -6  10  -3    4.31    0.96
  -7  10  -3    7.37    1.10
  -8  10  -3   -0.89    0.88
  -8  10  -3    1.40    0.87
  -9  10  -3    2.00    0.98
  -9  10  -3    2.41    1.02
 -10  10  -3    4.07    1.11
 -10  10  -3    1.49    1.10
 -11  10  -3   14.40    1.45
 -11  10  -3   16.04    1.59
 -12  10  -3    2.46    1.29
 -13  -9   3    0.28    1.25
 -13  -9   3    1.48    1.53
 -12  -9   3   -0.64    1.30
 -12  -9   3    0.16    1.09
 -11  -9   3    0.17    1.17
 -11  -9   3   -0.44    0.95
 -10  -9   3   23.85    1.99
 -10  -9   3   24.12    1.77
  -9  -9   3    3.98    0.90
  -9  -9   3    5.08    1.20
   8   9  -3   63.11    2.23
  -8  -9   3   58.14    2.13
  -8  -9   3   57.40    2.48
   7   9  -3   15.19    1.23
  -7  -9   3   13.57    1.09
  -7  -9   3   12.65    1.24
   6   9  -3    2.05    0.73
  -6  -9   3    1.79    0.82
  -6  -9   3    2.75    0.56
   5   9  -3   16.18    1.20
  -5  -9   3   14.05    1.27
  -5  -9   3   14.44    0.86
   4   9  -3    0.51    0.60
  -4  -9   3    0.75    0.35
  -4  -9   3    0.70    0.63
   3   9  -3   21.36    1.23
  -3  -9   3   18.95    1.19
   2   9  -3    5.67    0.76
  -2  -9   3    4.60    0.68
   1   9  -3   43.12    1.68
  -1  -9   3   41.05    1.54
   0   9  -3    9.11    0.85
   0  -9   3    9.45    0.77
  -1   9  -3   68.62    2.30
   1  -9   3   69.65    2.07
  -2   9  -3   15.93    1.17
  -2   9  -3   17.37    0.82
   2  -9   3   17.92    1.08
  -3   9  -3    0.67    0.61
  -3   9  -3    0.13    0.42
  -4   9  -3   17.45    1.03
  -4   9  -3   15.78    1.25
  -5   9  -3   28.16    1.51
  -5   9  -3   27.21    1.30
  -6   9  -3    0.46    0.73
  -7   9  -3    5.96    0.93
  -7   9  -3    6.61    1.01
  -8   9  -3    3.73    0.97
  -8   9  -3    4.38    0.99
  -9   9  -3    6.83    1.09
  -9   9  -3    6.43    1.11
 -10   9  -3   -1.48    0.85
 -10   9  -3    1.24    1.04
 -11   9  -3    3.48    1.19
 -11   9  -3    0.79    0.98
 -12   9  -3   17.02    1.68
 -13   9  -3    3.03    1.38
 -13  -8   3   -1.58    1.19
 -12  -8   3    8.53    1.30
 -11  -8   3   25.93    1.80
 -10  -8   3   79.10    2.82
  -9  -8   3    8.90    1.29
  -9  -8   3    7.72    0.99
   8   8  -3    0.30    0.66
  -8  -8   3    1.03    0.72
  -8  -8   3    0.05    0.99
   7   8  -3   13.34    1.11
  -7  -8   3   13.70    1.25
  -7  -8   3   14.47    1.08
   6   8  -3    6.85    0.76
  -6  -8   3    7.81    0.95
  -6  -8   3    5.82    0.63
   5   8  -3    7.22    0.76
  -5  -8   3    6.64    0.85
  -5  -8   3    7.11    0.58
  -4  -8   3   14.11    0.72
  -4  -8   3   13.10    1.10
   3   8  -3    6.99    0.72
  -3  -8   3    5.00    0.69
   2   8  -3   30.40    1.35
  -2  -8   3   28.58    1.27
   1   8  -3   69.77    2.17
  -1  -8   3   64.65    2.01
   0   8  -3    1.72    0.60
   0  -8   3    2.20    0.57
  -1   8  -3    3.15    0.62
  -1   8  -3    5.42    0.50
   1  -8   3    3.42    0.59
  -2   8  -3    9.15    0.67
  -2   8  -3    8.37    0.81
   2  -8   3    7.81    0.69
  -3   8  -3    2.46    0.48
  -3   8  -3    2.38    0.62
  -4   8  -3   82.41    2.60
  -4   8  -3   83.78    2.40
  -5   8  -3   10.11    0.97
  -5   8  -3   11.70    1.11
  -6   8  -3    2.55    0.73
  -7   8  -3   24.91    1.45
  -7   8  -3   22.46    1.49
  -8   8  -3   11.85    1.15
  -8   8  -3   16.08    1.44
  -9   8  -3   38.93    1.99
  -9   8  -3   42.53    1.97
 -10   8  -3   -0.33    0.97
 -10   8  -3   -0.63    0.84
 -11   8  -3    6.51    1.13
 -11   8  -3    5.56    1.25
 -12   8  -3    2.50    1.23
 -13   8  -3    0.26    1.29
 -13  -7   3    6.58    1.40
 -12  -7   3   15.74    1.52
 -11  -7   3    1.09    0.96
 -10  -7   3   10.09    1.15
  -9  -7   3    2.90    0.88
   8   7  -3   -0.50    0.56
  -8  -7   3    0.29    0.67
   7   7  -3   35.61    1.39
  -7  -7   3   37.91    1.49
  -7  -7   3   31.38    1.75
   6   7  -3   -0.14    0.49
  -6  -7   3    0.29    0.45
  -6  -7   3   -0.49    0.68
   5   7  -3    1.72    0.55
  -5  -7   3    1.32    0.66
  -5  -7   3    1.96    0.42
   4   7  -3   61.32    1.95
  -4  -7   3   60.65    1.71
  -4  -7   3   60.25    2.00
   3   7  -3   78.93    2.34
  -3  -7   3   78.00    2.05
  -3  -7   3   80.60    2.31
   2   7  -3    5.74    0.66
  -2  -7   3    5.92    0.65
   1   7  -3    1.35    0.56
  -1  -7   3    1.41    0.53
   0   7  -3   61.84    2.01
   0  -7   3   62.51    1.86
  -1   7  -3  122.75    3.02
  -1   7  -3  118.97    3.36
   1  -7   3  122.85    3.12
  -2   7  -3   88.28    2.37
  -2   7  -3   91.07    2.68
   2  -7   3   91.00    2.45
  -3   7  -3   50.81    1.81
  -3   7  -3   49.95    1.57
  -4   7  -3   12.58    1.10
  -4   7  -3   16.39    0.96
  -5   7  -3    8.61    0.83
  -6   7  -3    4.22    0.74
  -6   7  -3    5.25    0.71
  -7   7  -3    0.73    0.67
  -7   7  -3    2.12    0.72
  -8   7  -3    0.97    0.72
  -8   7  -3    1.34    0.83
  -9   7  -3   49.58    2.27
  -9   7  -3   49.06    2.06
 -10   7  -3   24.17    1.59
 -10   7  -3   26.85    1.90
 -11   7  -3   25.90    2.05
 -12   7  -3   13.94    1.58
 -13   7  -3    5.42    1.44
 -14   7  -3    0.71    1.40
 -14  -6   3    1.75    1.34
 -13  -6   3   -0.94    1.16
 -12  -6   3    9.57    1.32
 -11  -6   3   12.45    1.32
 -10  -6   3   49.52    2.16
  -9  -6   3    0.93    0.78
  -8  -6   3    0.18    0.70
   7   6  -3    3.19    0.54
  -7  -6   3    3.04    0.65
   6   6  -3    0.21    0.44
  -6  -6   3   -0.02    0.70
  -6  -6   3    0.37    0.43
   5   6  -3    2.95    0.51
  -5  -6   3    3.05    0.44
  -5  -6   3    3.16    0.70
   4   6  -3   -0.09    0.44
  -4  -6   3    0.60    0.56
  -4  -6   3    0.69    0.34
  -3  -6   3    1.35    0.56
  -3  -6   3    1.21    0.29
   2   6  -3    3.14    0.55
  -2  -6   3    3.18    0.56
   1   6  -3   94.38    2.62
  -1  -6   3   90.71    2.46
   0   6  -3  326.74    7.97
   0  -6   3  322.84    7.53
  -1   6  -3    0.56    0.47
  -1   6  -3    0.66    0.26
   1  -6   3    0.71    0.46
  -2   6  -3  126.86    3.22
  -2   6  -3  130.95    3.47
   2  -6   3  125.04    3.19
  -3   6  -3  174.99    4.61
  -3   6  -3  178.02    4.43
  -4   6  -3   65.04    1.98
  -4   6  -3   68.06    2.15
  -5   6  -3    1.28    0.54
  -5   6  -3    1.43    0.57
  -6   6  -3   60.10    2.07
  -6   6  -3   64.05    2.09
  -7   6  -3   -0.25    0.63
  -7   6  -3    0.46    0.59
  -8   6  -3   14.64    1.40
  -8   6  -3   14.72    1.22
  -9   6  -3   15.61    1.29
  -9   6  -3   14.59    1.31
 -10   6  -3    2.26    1.05
 -10   6  -3    1.34    0.78
 -11   6  -3    0.44    1.11
 -12   6  -3   29.69    2.27
 -13   6  -3   19.80    1.82
 -14   6  -3    2.23    1.44
 -14  -5   3    1.85    1.35
 -13  -5   3    0.55    1.19
 -12  -5   3   18.79    1.61
 -11  -5   3    8.52    1.20
 -10  -5   3    1.60    0.90
  -9  -5   3    4.23    0.86
  -8  -5   3    4.62    0.77
  -7  -5   3   17.89    1.10
   6   5  -3    1.19    0.42
  -6  -5   3    0.38    0.48
   5   5  -3    0.75    0.41
  -5  -5   3    2.00    0.65
   4   5  -3   71.68    2.07
  -4  -5   3   74.11    2.21
  -4  -5   3   73.35    1.99
  -3  -5   3   16.15    0.65
  -3  -5   3   13.97    0.97
   2   5  -3  209.40    5.14
  -2  -5   3  203.26    4.94
   1   5  -3   61.99    1.82
  -1  -5   3   60.46    1.71
   0   5  -3  130.19    3.42
   0  -5   3  131.17    3.22
  -1   5  -3   54.63    1.43
  -1   5  -3   55.42    1.70
   1  -5   3   53.27    1.56
  -2   5  -3   17.07    0.95
  -2   5  -3   20.67    0.74
   2  -5   3   16.57    0.84
  -3   5  -3   -0.04    0.37
  -3   5  -3    0.06    0.47
  -4   5  -3    9.66    0.90
  -5   5  -3   15.04    1.02
  -5   5  -3   16.87    1.02
  -6   5  -3    0.21    0.51
  -6   5  -3   -0.27    0.51
  -7   5  -3    3.60    0.64
  -7   5  -3    2.23    0.68
  -8   5  -3    9.13    0.86
  -8   5  -3   10.09    0.98
  -9   5  -3   18.55    1.28
  -9   5  -3   17.54    1.57
 -10   5  -3   28.17    1.90
 -10   5  -3   28.16    1.50
 -11   5  -3   -0.44    1.02
 -12   5  -3    9.96    1.46
 -13   5  -3    4.88    1.44
 -14   5  -3    1.66    1.40
 -14  -4   3    1.57    1.36
 -13  -4   3    6.00    1.34
 -12  -4   3    0.11    1.05
 -11  -4   3   38.67    2.12
 -10  -4   3    1.94    0.93
  -9  -4   3    6.04    0.90
  -8  -4   3   28.84    1.43
  -7  -4   3    6.96    0.72
   6   4  -3   -0.02    0.34
  -6  -4   3    0.85    0.47
   5   4  -3   33.94    1.14
  -5  -4   3   35.37    1.27
   4   4  -3   60.41    1.71
  -4  -4   3   60.64    1.70
  -4  -4   3   58.73    1.91
   3   4  -3    0.41    0.34
  -3  -4   3    0.04    0.41
  -3  -4   3    0.29    0.23
  -2  -4   3   30.15    1.08
   1   4  -3  138.24    3.42
  -1  -4   3  128.74    3.25
   0   4  -3  186.46    4.64
   0  -4   3  185.34    4.39
  -1   4  -3  243.85    5.79
   1  -4   3  242.71    5.66
  -2   4  -3  108.17    2.71
  -2   4  -3  106.12    2.85
  -3   4  -3    0.47    0.39
  -3   4  -3    0.25    0.33
  -4   4  -3   48.89    1.62
  -5   4  -3   48.86    1.58
  -5   4  -3   37.20    1.49
  -6   4  -3   42.72    1.64
  -6   4  -3   45.30    1.57
  -7   4  -3   33.88    1.35
  -7   4  -3   33.09    1.51
  -8   4  -3   10.07    0.94
  -8   4  -3   11.06    1.00
  -9   4  -3   18.05    1.15
  -9   4  -3   17.23    1.47
 -10   4  -3    3.64    0.73
 -10   4  -3    2.55    0.97
 -11   4  -3   14.83    1.44
 -12   4  -3   34.47    2.25
 -13   4  -3    7.39    1.47
 -14   4  -3    3.96    1.50
 -14  -3   3   16.91    1.76
 -13  -3   3    2.41    1.25
 -12  -3   3    3.41    1.15
 -11  -3   3    1.02    0.99
 -10  -3   3    1.81    0.89
  -9  -3   3   -0.13    0.70
  -8  -3   3   14.71    1.16
  -7  -3   3    0.06    0.49
  -6  -3   3    8.99    0.84
  -5  -3   3   44.32    1.48
   4   3  -3   36.56    1.12
  -4  -3   3   37.51    1.19
   3   3  -3  162.69    3.98
  -3  -3   3  160.44    3.94
  -3  -3   3  161.83    3.96
  -2  -3   3  213.67    5.11
  -2  -3   3  214.91    5.05
   1   3  -3    3.83    0.41
  -1  -3   3    2.44    0.41
   0   3  -3   34.26    1.17
   0  -3   3   34.12    1.11
  -1   3  -3  379.81    8.94
  -1   3  -3  382.72    9.06
   1  -3   3  373.18    8.62
  -2   3  -3  159.51    3.99
  -2   3  -3  157.67    3.89
  -3   3  -3    2.80    0.42
  -4   3  -3    0.17    0.38
  -4   3  -3    0.00    0.37
  -5   3  -3  168.34    4.25
  -5   3  -3  163.57    4.31
  -6   3  -3   13.12    1.04
  -6   3  -3   14.61    0.93
  -7   3  -3    1.12    0.60
  -7   3  -3    0.76    0.47
  -8   3  -3    9.75    0.91
  -8   3  -3    9.38    0.88
  -9   3  -3   18.95    1.10
  -9   3  -3   15.95    1.43
 -10   3  -3   22.24    1.25
 -10   3  -3   22.55    1.73
 -11   3  -3    2.33    1.03
 -12   3  -3    3.04    1.19
 -13   3  -3    2.58    1.29
 -14   3  -3    1.29    1.35
 -14  -2   3   28.53    2.40
 -13  -2   3   -0.49    1.14
 -12  -2   3    0.59    1.08
 -11  -2   3   12.77    1.31
 -10  -2   3   45.37    2.07
  -9  -2   3    1.91    0.74
  -8  -2   3    0.74    0.60
  -7  -2   3   -0.42    0.48
  -6  -2   3   36.97    1.39
  -5  -2   3   -0.24    0.40
   4   2  -3   56.76    1.49
  -4  -2   3   56.92    1.63
   3   2  -3   22.70    0.76
  -3  -2   3   22.94    0.78
  -3  -2   3   22.91    0.96
   2   2  -3   34.05    1.05
  -2  -2   3   33.37    1.14
   1   2  -3   76.73    2.00
  -1  -2   3   71.80    1.95
   0   2  -3  493.04   11.53
   0  -2   3  482.58   11.01
  -1   2  -3  173.23    4.19
  -1   2  -3  177.18    4.32
   1  -2   3  174.17    4.11
  -2   2  -3    6.48    0.64
  -2   2  -3    7.08    0.53
  -3   2  -3   24.22    0.92
  -4   2  -3   13.07    0.72
  -4   2  -3   12.77    0.73
  -5   2  -3   34.98    1.22
  -5   2  -3   32.13    1.27
  -6   2  -3   -0.11    0.49
  -6   2  -3   -0.04    0.40
  -7   2  -3    3.23    0.63
  -7   2  -3    3.39    0.51
  -8   2  -3    0.04    0.61
  -8   2  -3   -0.55    0.45
  -9   2  -3    9.02    0.98
  -9   2  -3    8.66    0.72
 -10   2  -3    4.59    0.99
 -10   2  -3    4.65    0.67
 -11   2  -3    7.71    1.18
 -12   2  -3   15.84    1.51
 -13   2  -3    2.74    1.26
 -14   2  -3   21.95    1.94
 -15   2  -3    6.30    1.63
 -15  -1   3    1.89    1.46
 -14  -1   3    0.93    1.27
 -13  -1   3    4.56    1.32
 -12  -1   3   -0.74    1.05
 -11  -1   3   17.29    1.45
 -10  -1   3    4.27    0.95
  -9  -1   3   -0.91    0.69
  -8  -1   3    0.02    0.56
  -7  -1   3    3.48    0.61
  -6  -1   3   71.00    2.15
  -5  -1   3   57.63    1.76
  -4  -1   3    0.40    0.30
   3   1  -3  168.86    4.02
  -3  -1   3  167.92    4.15
   2   1  -3  109.02    2.65
  -2  -1   3  106.29    2.66
  -2  -1   3  106.03    2.67
   1   1  -3    7.21    0.40
  -1  -1   3    6.63    0.38
  -1  -1   3    7.47    0.64
   0   1  -3  344.60    8.11
   0  -1   3  339.17    7.75
  -1   1  -3   16.08    0.60
  -1   1  -3   15.28    0.74
   1  -1   3   14.88    0.73
  -2   1  -3   30.05    1.08
  -3   1  -3   80.91    2.12
  -3   1  -3   76.58    2.11
  -4   1  -3    1.42    0.35
  -4   1  -3    1.86    0.34
  -5   1  -3  171.39    4.47
  -5   1  -3  177.41    4.34
  -6   1  -3    3.02    0.47
  -7   1  -3    9.87    0.82
  -7   1  -3    9.80    0.75
  -8   1  -3   39.74    1.70
  -8   1  -3   42.45    1.41
  -9   1  -3   12.65    1.07
  -9   1  -3   14.27    0.92
 -10   1  -3   10.11    1.14
 -10   1  -3   10.37    0.80
 -11   1  -3   -0.03    0.94
 -12   1  -3    1.64    1.06
 -13   1  -3   10.52    1.48
 -14   1  -3    7.61    1.52
 -15   1  -3    1.64    1.45
 -15   0   3    8.45    1.69
 -14   0   3   -1.73    1.21
 -13   0   3    8.26    1.42
 -12   0   3   15.51    1.54
 -11   0   3   10.68    1.28
 -10   0   3   -1.17    0.78
  -9   0   3   13.32    1.10
  -8   0   3   59.43    2.09
  -7   0   3   32.43    1.40
  -6   0   3    1.88    0.54
  -5   0   3    2.26    0.45
  -4   0   3    0.07    0.29
  -3   0   3  104.12    2.68
   2   0  -3  143.81    3.32
  -2   0   3  137.57    3.29
  -2   0   3  131.05    3.38
  -1   0   3   46.27    1.21
  -1   0   3   45.82    1.23
   0   0  -3    5.10    0.29
   0   0  -3    5.26    0.37
   0   0   3    5.51    0.38
   0   0   3    4.75    0.27
  -1   0  -3   99.62    2.50
  -2   0  -3  140.45    3.47
  -2   0  -3  139.18    3.46
  -3   0  -3    3.71    0.40
  -3   0  -3    4.00    0.42
  -4   0  -3   19.59    0.85
  -4   0  -3   20.33    0.78
  -5   0  -3   24.75    1.06
  -5   0  -3   24.60    0.91
  -6   0  -3   97.76    2.54
  -6   0  -3   92.76    2.73
  -7   0  -3  100.50    2.62
  -7   0  -3   96.93    2.89
  -8   0  -3    0.82    0.58
  -8   0  -3    1.29    0.40
  -9   0  -3   23.77    1.46
  -9   0  -3   22.70    1.02
 -10   0  -3   81.54    2.86
 -11   0  -3    6.24    1.12
 -12   0  -3   10.23    1.34
 -13   0  -3    6.56    1.32
 -14   0  -3    9.17    1.54
 -15   0  -3    2.62    1.48
 -15   1   3    0.40    1.36
 -14   1   3    2.19    1.34
 -13   1   3   12.87    1.55
 -12   1   3    2.43    1.12
 -11   1   3   10.96    1.28
 -10   1   3    4.33    0.93
  -9   1   3    2.47    0.76
  -8   1   3   40.80    1.68
  -7   1   3   11.75    1.00
  -6   1   3   35.65    1.44
  -5   1   3    6.12    0.58
  -4   1   3   50.93    1.54
  -3   1   3   43.03    1.32
   2  -1  -3    8.37    0.52
  -2   1   3    8.69    0.61
  -1   1   3    3.52    0.33
   0  -1  -3  149.40    3.58
   0   1   3  145.34    3.55
  -1  -1  -3   85.23    2.15
  -2  -1  -3    1.96    0.39
  -3  -1  -3   41.40    1.28
  -3  -1  -3   39.00    1.21
  -4  -1  -3   18.05    0.72
  -4  -1  -3   18.47    0.83
  -5  -1  -3    3.10    0.45
  -5  -1  -3    2.56    0.39
  -6  -1  -3    1.18    0.49
  -6  -1  -3    1.66    0.39
  -7  -1  -3   13.30    0.71
  -7  -1  -3   13.22    1.04
  -8  -1  -3    3.81    0.49
  -8  -1  -3    5.29    0.74
  -9  -1  -3   21.31    0.98
  -9  -1  -3   22.68    1.42
 -10  -1  -3    4.22    0.89
 -11  -1  -3   39.74    2.09
 -12  -1  -3   11.69    1.36
 -13  -1  -3    1.69    1.12
 -14  -1  -3    7.28    1.41
 -15  -1  -3   -0.02    1.37
 -15   2   3    1.25    1.39
 -14   2   3   -0.77    1.20
 -13   2   3    3.62    1.26
 -12   2   3   -0.63    1.01
 -11   2   3    6.30    1.13
 -10   2   3    9.66    1.11
  -9   2   3    2.45    0.76
  -8   2   3    0.34    0.57
  -7   2   3    0.81    0.53
  -6   2   3    8.85    0.76
  -5   2   3   13.95    0.87
  -4   2   3   23.44    0.94
  -3   2   3  175.07    4.36
   2  -2  -3  117.90    2.89
  -2   2   3  115.64    2.96
  -1   2   3  418.73    9.92
   0  -2  -3  126.58    3.08
   0   2   3  125.27    3.07
  -1  -2  -3  259.43    6.19
  -2  -2  -3    1.25    0.40
  -3  -2  -3    0.70    0.34
  -4  -2  -3    0.90    0.30
  -4  -2  -3    0.76    0.34
  -5  -2  -3  172.80    4.30
  -5  -2  -3  161.18    4.10
  -6  -2  -3   16.59    0.77
  -6  -2  -3   17.43    1.01
  -7  -2  -3    0.12    0.31
  -7  -2  -3    0.86    0.50
  -8  -2  -3  155.55    4.32
  -8  -2  -3  159.79    3.95
  -9  -2  -3   29.48    1.58
 -10  -2  -3    8.95    1.05
 -11  -2  -3    0.33    0.90
 -12  -2  -3    0.62    0.99
 -13  -2  -3   -0.45    1.10
 -14  -2  -3   16.25    1.69
 -15  -2  -3    0.33    1.39
 -15   3   3   12.63    1.75
 -14   3   3   18.76    1.78
 -13   3   3   12.05    1.47
 -12   3   3   -0.51    0.98
 -11   3   3   40.13    2.16
 -10   3   3    1.82    0.87
  -9   3   3    1.99    0.75
  -8   3   3    6.83    0.79
  -7   3   3    0.10    0.50
  -6   3   3   55.59    1.86
  -5   3   3   42.07    1.45
  -5   3   3   41.01    1.16
  -4   3   3  165.72    4.04
  -4   3   3  168.84    4.25
  -3   3   3  297.72    7.05
  -3   3   3  282.45    6.88
  -2   3   3  379.75    9.16
  -2   3   3  386.20    9.04
  -1   3   3   38.63    1.16
  -1   3   3   39.90    1.16
   0   3   3   21.37    0.75
   0   3   3   21.80    0.74
  -1  -3  -3  102.25    2.61
  -2  -3  -3   27.85    1.05
  -3  -3  -3   92.94    2.41
  -4  -3  -3    2.56    0.36
  -4  -3  -3    2.03    0.40
  -5  -3  -3  161.24    4.11
  -5  -3  -3  156.36    3.93
  -6  -3  -3    2.21    0.53
  -6  -3  -3    2.11    0.41
  -7  -3  -3    1.41    0.54
  -8  -3  -3    1.17    0.59
  -8  -3  -3    0.64    0.37
  -9  -3  -3  301.38    7.75
 -10  -3  -3    5.19    0.94
 -11  -3  -3   57.03    2.43
 -12  -3  -3    3.90    1.10
 -13  -3  -3    1.48    1.14
 -14  -3  -3    1.12    1.25
 -15  -3  -3    0.29    1.34
 -14   4   3   14.24    1.66
 -13   4   3   24.62    2.09
 -12   4   3    5.31    1.15
 -11   4   3   87.59    3.13
 -10   4   3    7.54    1.00
  -9   4   3   10.89    1.00
  -8   4   3    2.86    0.64
  -7   4   3   21.46    1.17
  -6   4   3    0.37    0.29
  -6   4   3    0.78    0.50
  -5   4   3  169.18    4.41
  -5   4   3  170.21    4.16
  -4   4   3    2.38    0.42
  -4   4   3    2.69    0.32
  -3   4   3   72.11    2.04
  -3   4   3   75.36    1.95
  -2   4   3  675.76   16.25
  -2   4   3  695.73   16.11
  -1   4   3   22.31    0.89
  -1   4   3   21.39    0.89
   0   4   3    3.78    0.42
   0   4   3    3.76    0.44
   1   4   3  166.31    4.10
   2   4   3   40.17    1.25
  -3  -4  -3  104.00    2.69
  -4  -4  -3   36.98    1.19
  -5  -4  -3   42.95    1.48
  -5  -4  -3   42.67    1.35
  -6  -4  -3   10.23    0.72
  -6  -4  -3   11.27    0.93
  -7  -4  -3   25.10    1.23
  -7  -4  -3   23.95    0.96
  -8  -4  -3  181.89    4.53
  -8  -4  -3  183.80    4.92
  -9  -4  -3   43.32    1.39
  -9  -4  -3   44.82    1.87
 -10  -4  -3   43.10    2.02
 -11  -4  -3   45.89    2.22
 -12  -4  -3    2.79    1.09
 -13  -4  -3    3.69    1.19
 -14  -4  -3    6.61    1.46
 -15  -4  -3    0.71    1.35
 -14   5   3    0.75    1.32
 -13   5   3    0.90    1.21
 -12   5   3   14.77    1.47
 -11   5   3  134.04    4.19
 -10   5   3   58.20    2.37
  -9   5   3    0.87    0.70
  -8   5   3    7.51    0.66
  -8   5   3    7.66    0.85
  -7   5   3   -0.51    0.51
  -7   5   3   -0.15    0.33
  -6   5   3    2.30    0.40
  -6   5   3    2.29    0.57
  -5   5   3    4.59    0.65
  -5   5   3    5.39    0.49
  -4   5   3    5.91    0.55
  -4   5   3    4.99    0.45
  -3   5   3   13.18    0.66
  -3   5   3   13.89    0.74
  -2   5   3  198.47    4.85
  -2   5   3  196.06    4.88
  -1   5   3  745.97   17.47
  -1   5   3  738.79   17.56
   0   5   3   26.35    1.01
   0   5   3   25.50    0.94
   1   5   3   58.12    1.70
   2   5   3   23.38    0.92
  -4  -5  -3   16.34    0.82
  -5  -5  -3   50.78    1.56
  -5  -5  -3   48.56    1.67
  -6  -5  -3   13.85    0.98
  -6  -5  -3   13.79    0.82
  -7  -5  -3   10.21    0.75
  -7  -5  -3   10.17    0.93
  -8  -5  -3   25.28    1.35
  -8  -5  -3   24.95    1.02
  -9  -5  -3    6.41    0.86
 -10  -5  -3    4.68    0.91
 -11  -5  -3   -0.49    0.91
 -12  -5  -3   11.80    1.30
 -13  -5  -3    3.54    1.20
 -14  -5  -3   -0.93    1.19
 -15  -5  -3   -2.26    1.30
 -14   6   3    1.69    1.36
 -13   6   3    0.27    1.21
 -12   6   3   -0.18    1.08
 -11   6   3    1.60    1.02
 -10   6   3    8.93    1.17
  -9   6   3    1.35    0.78
  -9   6   3    1.22    0.46
  -8   6   3    0.25    0.64
  -8   6   3    0.30    0.40
  -7   6   3    7.23    0.59
  -7   6   3    7.79    0.80
  -6   6   3   25.79    1.06
  -6   6   3   25.41    1.27
  -5   6   3    0.37    0.40
  -4   6   3   81.88    2.34
  -4   6   3   78.15    2.22
  -3   6   3  120.79    3.12
  -3   6   3  118.77    3.16
  -2   6   3  103.51    2.74
  -2   6   3  104.35    2.73
  -1   6   3  165.41    4.14
  -1   6   3  162.97    4.09
   0   6   3   86.58    2.36
   0   6   3   87.20    2.30
   1   6   3   83.10    2.28
   2   6   3  133.47    3.43
   3   6   3   11.49    0.71
  -5  -6  -3    9.02    0.72
  -6  -6  -3    0.91    0.47
  -6  -6  -3    0.79    0.49
  -7  -6  -3    9.00    0.79
  -7  -6  -3    7.34    0.76
  -8  -6  -3   56.67    1.76
  -8  -6  -3   58.11    2.08
  -9  -6  -3    7.55    0.94
  -9  -6  -3    7.57    0.64
 -10  -6  -3   20.16    1.61
 -11  -6  -3    1.85    0.97
 -12  -6  -3    2.94    1.08
 -13  -6  -3   15.69    1.54
 -14  -6  -3    0.35    1.22
 -14   7   3   -1.48    1.31
 -13   7   3    0.31    1.24
 -12   7   3    3.55    1.20
 -11   7   3   10.03    1.31
 -10   7   3   20.98    1.76
  -9   7   3   55.36    2.29
  -9   7   3   56.32    1.85
  -8   7   3    0.90    0.68
  -8   7   3    0.85    0.50
  -7   7   3    0.56    0.45
  -7   7   3    0.70    0.58
  -6   7   3   41.46    1.45
  -6   7   3   40.33    1.61
  -5   7   3    3.37    0.60
  -5   7   3    2.38    0.51
  -4   7   3   32.97    1.32
  -4   7   3   32.24    1.28
  -3   7   3   35.06    1.28
  -3   7   3   34.58    1.27
  -2   7   3   14.93    0.81
  -2   7   3   14.09    0.77
  -1   7   3   21.84    0.88
  -1   7   3   21.74    0.94
   0   7   3    0.93    0.37
   0   7   3    0.80    0.32
   1   7   3  152.02    3.90
   2   7   3    5.28    0.53
   3   7   3   19.04    0.95
   5   7   3   -0.09    0.44
  -6  -7  -3   10.65    0.90
  -6  -7  -3   11.04    0.97
  -7  -7  -3   33.70    1.48
  -7  -7  -3   34.19    1.31
  -8  -7  -3    6.04    0.79
  -8  -7  -3    6.93    0.66
  -9  -7  -3   15.44    0.99
  -9  -7  -3   14.48    1.39
 -10  -7  -3   11.20    1.15
 -11  -7  -3    1.21    0.94
 -12  -7  -3    1.84    1.08
 -13  -7  -3    4.17    1.23
 -14  -7  -3    2.08    1.28
 -14   8   3    0.85    1.36
 -13   8   3    7.22    1.46
 -12   8   3    2.08    1.22
 -11   8   3    2.60    1.10
 -10   8   3    7.65    1.17
  -9   8   3   30.64    1.49
  -9   8   3   38.55    1.93
  -8   8   3   -0.08    0.53
  -8   8   3   -0.84    0.68
  -7   8   3   10.37    0.98
  -7   8   3   11.36    0.96
  -6   8   3    1.10    0.51
  -6   8   3    3.07    0.63
  -5   8   3  178.28    4.69
  -5   8   3  177.53    4.60
  -4   8   3    1.34    0.52
  -4   8   3    1.01    0.52
  -3   8   3    1.90    0.51
  -3   8   3    0.38    0.46
  -2   8   3    1.42    0.48
  -2   8   3    1.15    0.41
  -1   8   3    0.35    0.41
  -1   8   3    0.01    0.34
   0   8   3    3.36    0.51
   0   8   3    3.26    0.44
   1   8   3    2.41    0.49
   2   8   3   26.53    1.19
   3   8   3    8.04    0.73
   4   8   3   22.71    1.16
   5   8   3   14.04    0.94
  -6  -8  -3    9.95    0.83
   6   8   3    8.95    0.72
  -7  -8  -3    3.76    0.66
  -7  -8  -3    3.55    0.66
  -8  -8  -3    0.88    0.64
  -8  -8  -3    1.10    0.61
  -9  -8  -3   22.48    1.21
  -9  -8  -3   21.57    1.55
 -10  -8  -3   -0.01    0.84
 -11  -8  -3    3.60    1.02
 -12  -8  -3    0.14    1.06
 -13  -8  -3    0.13    1.13
 -14  -8  -3   -2.04    1.18
 -14   9   3    2.11    1.44
 -13   9   3    0.00    1.26
 -12   9   3    0.83    1.20
 -11   9   3    1.32    1.10
 -10   9   3    4.73    1.11
  -9   9   3    7.58    0.88
  -9   9   3    6.52    1.09
  -8   9   3   -1.43    0.57
  -7   9   3   58.03    2.03
  -7   9   3   59.46    2.15
  -6   9   3   50.86    1.79
  -6   9   3   50.07    1.88
  -5   9   3   21.22    1.14
  -5   9   3   19.22    1.15
  -4   9   3   30.71    1.38
  -4   9   3   36.81    1.42
  -3   9   3   18.58    1.06
  -3   9   3   16.01    1.01
  -2   9   3    0.86    0.48
  -2   9   3    1.20    0.53
  -1   9   3   51.38    1.67
  -1   9   3   56.64    1.84
   0   9   3    0.01    0.49
   1   9   3   40.53    1.55
   2   9   3  212.78    5.44
   3   9   3   45.11    1.67
   4   9   3    2.81    0.61
   6   9   3   -0.13    0.53
  -7  -9  -3    0.40    0.57
   7   9   3   -0.28    0.55
  -8  -9  -3    2.92    0.77
  -8  -9  -3    2.30    0.73
  -9  -9  -3   16.16    1.25
  -9  -9  -3   19.14    1.54
 -10  -9  -3   -0.42    0.88
 -11  -9  -3    7.03    1.14
 -12  -9  -3    0.13    1.06
 -13  -9  -3    0.43    1.16
 -14  -9  -3    0.64    1.26
 -13  10   3    0.42    1.24
 -12  10   3    1.53    1.22
 -11  10   3   -0.05    1.07
 -10  10   3    7.71    0.98
 -10  10   3    8.69    1.24
  -9  10   3    3.99    0.84
  -9  10   3    4.07    1.03
  -8  10   3    7.79    0.92
  -8  10   3    7.96    1.05
  -7  10   3   58.47    2.24
  -7  10   3   60.10    2.13
  -6  10   3   32.04    1.53
  -6  10   3   33.52    1.54
  -5  10   3    9.98    0.85
  -5  10   3    9.87    0.86
  -4  10   3    4.75    0.64
  -4  10   3    3.36    0.65
  -3  10   3    0.20    0.46
  -3  10   3    0.19    0.51
  -2  10   3    4.17    0.56
  -2  10   3    3.08    0.61
  -1  10   3    3.52    0.63
   0  10   3    0.87    0.55
   1  10   3    2.61    0.61
   2  10   3   11.35    1.00
   3  10   3    8.33    0.79
   4  10   3    8.88    0.81
   5  10   3    0.51    0.56
   6  10   3    4.12    0.70
  -7 -10  -3    0.36    0.65
   7  10   3    0.18    0.65
  -8 -10  -3    4.03    0.85
  -8 -10  -3    4.87    0.87
  -9 -10  -3   24.07    1.63
  -9 -10  -3   21.36    1.40
 -10 -10  -3   31.93    1.94
 -11 -10  -3    5.03    1.11
 -12 -10  -3    0.76    1.09
 -13 -10  -3    1.37    1.22
 -13  11   3   -1.25    1.26
 -12  11   3    4.33    1.32
 -11  11   3    0.52    1.14
 -10  11   3    3.75    1.14
 -10  11   3    1.51    0.84
  -9  11   3    0.83    0.81
  -9  11   3    0.83    0.98
  -8  11   3   78.20    2.80
  -8  11   3   76.22    2.65
  -7  11   3   51.73    2.07
  -7  11   3   49.85    2.07
  -6  11   3  105.01    3.17
  -6  11   3  102.55    3.15
  -5  11   3   21.87    1.30
  -5  11   3   22.30    1.34
  -4  11   3   16.46    1.20
  -4  11   3   18.62    1.14
  -3  11   3    4.36    0.64
  -3  11   3    5.36    0.73
  -2  11   3    1.73    0.49
  -2  11   3    1.72    0.59
  -1  11   3    8.34    0.83
   0  11   3    5.07    0.71
   1  11   3   30.97    1.43
  -2 -11  -3    1.73    0.57
   2  11   3    2.24    0.64
   3  11   3   57.90    2.04
   4  11   3    3.45    0.72
   5  11   3    5.78    0.82
  -7 -11  -3   35.71    1.69
   7  11   3   37.62    1.70
  -8 -11  -3   43.97    1.98
   8  11   3   46.98    1.89
  -9 -11  -3   -0.26    0.85
  -9 -11  -3   -0.46    0.79
 -10 -11  -3    0.53    0.90
 -11 -11  -3    7.94    1.23
 -12 -11  -3    6.05    1.25
 -13 -11  -3    0.80    1.25
 -12  12   3   -1.67    1.19
 -11  12   3    4.16    1.24
 -10  12   3    5.38    1.18
 -10  12   3    4.16    0.98
  -9  12   3   14.28    1.25
  -9  12   3   14.31    1.35
  -8  12   3   25.97    1.74
  -8  12   3   22.96    1.67
  -7  12   3    5.44    0.96
  -7  12   3    5.75    1.00
  -6  12   3   30.02    1.65
  -6  12   3   30.51    1.66
  -5  12   3    0.85    0.67
  -5  12   3   -0.33    0.67
  -4  12   3    3.16    0.68
  -4  12   3    2.22    0.71
  -3  12   3   13.59    1.08
  -3  12   3   12.13    1.13
  -2  12   3   11.18    0.71
  -1  12   3   14.39    1.12
  -1  12   3    8.87    0.80
   0  12   3   18.13    1.02
   0  12   3   18.28    1.21
   1  12   3    3.83    0.70
  -2 -12  -3  114.71    3.01
   2  12   3  113.34    3.35
  -3 -12  -3    3.21    0.73
   3  12   3    3.59    0.76
   4  12   3   52.13    2.01
   5  12   3   11.15    1.03
  -7 -12  -3   -0.50    0.74
   7  12   3    0.38    0.79
  -8 -12  -3    1.26    0.82
   8  12   3    1.49    0.84
  -9 -12  -3    4.91    0.98
 -10 -12  -3    7.24    1.12
 -11 -12  -3   10.19    1.31
 -12 -12  -3    1.80    1.13
 -13 -12  -3    1.09    1.27
 -12  13   3    3.16    1.31
 -11  13   3    1.50    1.16
 -10  13   3    3.22    1.14
 -10  13   3    1.52    0.97
  -9  13   3   -0.18    0.96
  -9  13   3    0.77    0.96
  -8  13   3   12.26    1.27
  -8  13   3   12.21    1.26
  -7  13   3   -0.69    0.85
  -7  13   3    1.15    0.86
  -6  13   3    6.58    1.01
  -5  13   3    2.78    0.79
  -5  13   3    2.09    0.82
  -4  13   3    8.90    1.02
  -4  13   3   10.05    0.92
  -3  13   3   37.75    1.78
  -2  13   3    0.45    0.66
  -1  13   3    3.48    0.77
  -1  13   3    3.40    0.61
   0  13   3    1.66    0.55
   0  13   3    0.56    0.67
   1  13   3   -0.38    0.62
  -2 -13  -3   14.47    1.07
   2  13   3   14.97    1.29
  -3 -13  -3   29.45    1.44
   3  13   3   27.13    1.53
  -4 -13  -3   57.41    2.11
   4  13   3   58.44    2.24
   5  13   3   -0.59    0.80
   6  13   3    0.78    0.87
  -7 -13  -3   31.93    1.66
  -8 -13  -3    1.26    0.82
   8  13   3   -0.40    0.87
  -9 -13  -3   22.50    1.70
 -10 -13  -3   -0.70    0.93
 -11 -13  -3    1.10    1.08
 -12 -13  -3    7.99    1.37
 -12  14   3    2.96    1.35
 -11  14   3    0.67    1.21
 -10  14   3   -1.61    1.06
 -10  14   3   -0.77    0.98
  -9  14   3   10.83    1.30
  -9  14   3   10.43    1.32
  -8  14   3    2.45    1.04
  -8  14   3    4.27    1.03
  -7  14   3   -0.16    0.93
  -7  14   3    0.82    0.88
  -6  14   3   26.08    1.79
  -6  14   3   23.76    1.64
  -5  14   3   -0.79    0.83
  -5  14   3   -0.45    0.80
  -4  14   3    1.78    0.78
  -4  14   3    0.83    0.84
  -3  14   3   15.91    1.48
  -2  14   3   10.89    1.10
  -1  14   3   61.05    2.32
  -1  14   3   60.80    2.05
   0  14   3   42.66    1.91
   0  14   3   41.87    1.65
   1  14   3   20.62    1.54
  -2 -14  -3   10.12    0.86
   2  14   3    9.79    1.08
  -3 -14  -3   31.15    1.57
   3  14   3   30.92    1.77
  -4 -14  -3   66.64    2.31
   4  14   3   63.10    2.49
  -5 -14  -3   -0.05    0.96
   5  14   3    1.13    0.93
   6  14   3    7.83    1.09
  -7 -14  -3   10.73    1.08
  -8 -14  -3    4.73    0.92
   8  14   3    4.32    1.07
  -9 -14  -3    4.48    1.00
 -10 -14  -3    0.85    0.94
 -11 -14  -3   -0.67    1.05
 -12 -14  -3    0.61    1.16
 -11  15   3   11.54    1.56
 -10  15   3    0.78    1.14
 -10  15   3   -0.64    1.07
  -9  15   3    0.29    1.03
  -9  15   3   -0.66    1.05
  -8  15   3    5.39    1.11
  -8  15   3    6.41    1.24
  -7  15   3   21.87    1.77
  -7  15   3   19.99    1.81
  -6  15   3    1.09    0.87
  -6  15   3    0.97    1.01
  -5  15   3    2.63    0.89
  -5  15   3    3.31    1.05
  -4  15   3    3.23    1.00
  -3  15   3   43.63    2.11
  -2  15   3   76.91    2.83
  -2  15   3   80.19    2.55
  -1  15   3    0.90    0.85
  -1  15   3   -1.03    0.62
   0  15   3    0.25    0.84
   1  15   3   30.48    1.79
  -2 -15  -3    0.47    0.70
   2  15   3   -0.67    0.85
  -3 -15  -3   20.43    1.46
   3  15   3   21.23    1.72
  -4 -15  -3   58.13    2.24
   4  15   3   55.42    2.38
  -5 -15  -3    0.27    0.94
   5  15   3   -0.46    0.96
  -6 -15  -3    2.98    1.11
   6  15   3    2.27    1.06
  -7 -15  -3    9.39    1.35
  -7 -15  -3   10.17    1.07
  -8 -15  -3    6.31    1.00
   8  15   3    5.45    1.14
  -9 -15  -3   -0.52    0.88
 -10 -15  -3    1.49    0.99
 -11 -15  -3    2.15    1.14
 -10  16   3   -0.79    1.15
 -10  16   3    0.27    1.14
  -9  16   3   -0.26    1.14
  -9  16   3   -0.68    1.06
  -8  16   3   -0.28    1.07
  -8  16   3   -1.01    0.95
  -7  16   3    1.67    1.02
  -7  16   3    0.45    1.09
  -6  16   3    7.37    1.13
  -6  16   3    7.62    1.26
  -5  16   3    1.11    1.04
  -4  16   3    3.59    1.09
  -3  16   3   10.86    1.29
  -3  16   3   11.58    1.05
  -2  16   3   42.36    2.22
  -2  16   3   42.08    1.85
  -1  16   3    0.00    0.92
  -1  16   3    0.63    0.74
   0  16   3   -1.31    0.91
   1  16   3   25.04    1.81
  -2 -16  -3    0.94    0.78
   2  16   3    0.45    0.97
  -3 -16  -3   47.64    1.99
   3  16   3   46.94    2.26
  -4 -16  -3   24.39    1.73
   4  16   3   24.19    1.84
  -5 -16  -3    1.85    1.01
   5  16   3    0.60    1.04
  -6 -16  -3   10.24    1.32
   6  16   3    7.65    1.27
  -7 -16  -3    5.26    1.24
  -7 -16  -3    4.36    0.97
   7  16   3    4.93    1.20
  -8 -16  -3    1.19    0.89
  -8 -16  -3   -0.50    1.21
  -9 -16  -3   -0.98    1.29
 -10 -16  -3    0.39    1.50
 -10  17   3    5.80    1.46
  -9  17   3   -1.76    1.15
  -9  17   3    1.67    1.15
  -8  17   3   11.28    1.54
  -8  17   3   11.50    1.37
  -7  17   3    9.87    1.29
  -7  17   3    9.58    1.44
  -6  17   3   -0.05    1.11
  -6  17   3   -0.16    1.00
  -5  17   3   -1.10    1.05
  -4  17   3    1.03    1.07
  -3  17   3   -0.42    0.99
  -3  17   3   -0.63    0.75
  -2  17   3    2.56    1.09
  -2  17   3    2.90    0.80
  -1  17   3    4.59    0.83
  -1  17   3    4.61    1.15
   0  17   3   11.44    1.34
   1  17   3    5.14    1.17
  -2 -17  -3   -0.41    0.81
   2  17   3    0.70    1.09
  -3 -17  -3    4.95    0.96
   3  17   3    4.92    1.21
  -4 -17  -3    0.17    0.94
   4  17   3   -1.65    1.07
  -5 -17  -3    5.04    1.16
   5  17   3    7.19    1.28
  -6 -17  -3   -0.23    1.10
   6  17   3    2.62    1.17
  -7 -17  -3    0.26    1.17
   7  17   3    0.35    1.16
  -8 -17  -3   -0.26    1.28
  -9 -17  -3    0.42    1.38
  -9  18   3    3.93    1.29
  -9  18   3    4.71    1.44
  -8  18   3    3.65    1.23
  -8  18   3    5.06    1.46
  -7  18   3    2.38    1.33
  -7  18   3    4.83    1.24
  -6  18   3    0.84    1.22
  -5  18   3    0.64    1.19
  -4  18   3    0.91    0.89
  -4  18   3    0.31    1.13
  -3  18   3    1.00    0.82
  -3  18   3   -0.36    1.08
  -2  18   3    3.99    0.89
  -2  18   3    3.69    1.24
  -1  18   3    1.01    1.13
  -1  18   3    1.05    0.76
   0  18   3   -0.36    1.06
   1  18   3    7.64    1.36
   2  18   3    1.10    1.20
  -3 -18  -3    4.73    1.02
   3  18   3    3.27    1.28
  -4 -18  -3   -1.46    0.96
   4  18   3   -2.11    1.11
  -5 -18  -3    3.00    1.11
   5  18   3    2.34    1.24
  -6 -18  -3    0.21    1.14
   6  18   3   -0.47    1.20
  -7 -18  -3   -1.80    1.24
   7  18   3   -1.33    1.20
  -8 -18  -3    3.97    1.45
  -9 -18  -3    6.17    1.56
  -8  19   3    1.03    1.26
  -8  19   3    2.77    1.44
  -7  19   3    9.20    1.59
  -6  19   3   -1.38    1.25
  -5  19   3    3.44    1.07
  -5  19   3    2.59    1.36
  -4  19   3    0.83    1.24
  -3  19   3   -1.14    1.16
  -2  19   3   -0.42    1.13
  -1  19   3   -0.94    1.13
   0  19   3    2.13    1.23
   1  19   3    0.50    1.24
   2  19   3    3.37    1.37
   3  19   3    7.87    1.48
   4  19   3    0.44    1.30
  -5 -19  -3   -0.26    1.10
   5  19   3    0.75    1.24
  -6 -19  -3   -1.23    1.18
   6  19   3   -0.89    1.26
  -7 -19  -3    0.78    1.35
   7  19   3    3.04    1.43
   8  19   3   -0.52    1.34
  -6  20   3    3.15    1.46
  -5  20   3    0.44    1.32
  -4  20   3   -0.44    1.31
  -3  20   3   -1.53    1.24
  -2  20   3    0.56    1.26
  -1  20   3    0.84    1.32
   0  20   3   -0.20    1.28
   1  20   3    0.98    1.36
   2  20   3    2.25    1.35
   3  20   3    3.84    1.45
   4  20   3   -1.60    1.31
   5  20   3   -1.70    1.29
   6  20   3   -1.59    1.33
  -5  21   3    2.50    1.52
  -4  21   3   -0.03    1.37
  -3  21   3    1.50    1.43
  -2  21   3    1.86    1.42
  -1  21   3   -2.34    1.26
   0  21   3    1.07    1.36
   1  21   3   12.40    1.78
   2  21   3    0.27    1.37
   3  21   3    0.54    1.44
   4  21   3   -1.72    1.36
   5  21   3   -0.72    1.36
  -2  22   3   -0.98    1.48
  -1  22   3   -2.82    1.39
   0  22   3   -0.71    1.43
   1  22   3   16.72    1.93
   2  22   3    2.13    1.57
   2  19  -4    0.23    1.42
   1  19  -4   -0.03    1.43
   0  19  -4    2.39    1.50
  -1  19  -4   -1.85    1.43
  -2  19  -4    1.33    1.49
  -3  19  -4    0.96    1.47
   5  18  -4    7.26    1.65
   4  18  -4    1.29    1.45
  -4 -18   4   -0.59    1.35
   3  18  -4    2.18    1.42
  -3 -18   4    0.36    1.28
   2  18  -4    1.01    1.37
  -2 -18   4    0.19    1.21
   1  18  -4    1.53    1.36
  -1 -18   4    1.96    1.21
   0  18  -4   -0.62    1.30
  -1  18  -4   -0.65    1.29
  -2  18  -4    3.95    1.43
  -3  18  -4    0.43    1.33
  -4  18  -4    3.96    1.55
  -5  18  -4   -0.01    1.47
   6  17  -4   -0.84    1.28
  -6 -17   4    0.62    1.38
   5  17  -4    0.09    1.31
  -5 -17   4   -0.87    1.28
   4  17  -4   -2.26    1.21
  -4 -17   4    0.31    1.28
   3  17  -4    4.55    1.44
  -3 -17   4    2.39    1.24
   2  17  -4    3.65    1.33
  -2 -17   4    3.42    1.22
   1  17  -4    1.23    1.26
  -1 -17   4   -1.97    1.01
   0  17  -4   18.32    1.79
   0 -17   4   23.58    1.86
  -1  17  -4    1.67    1.29
   1 -17   4    0.61    1.07
  -2  17  -4    6.57    1.43
  -3  17  -4   -0.38    1.24
  -4  17  -4    2.26    1.40
  -5  17  -4   -0.23    1.30
  -6  17  -4    0.22    1.38
  -7  17  -4    2.13    1.49
  -7 -16   4    1.55    1.41
   6  16  -4   -1.86    1.22
  -6 -16   4   -1.02    1.27
   5  16  -4   -1.00    1.21
  -5 -16   4   -1.19    1.19
   4  16  -4    6.68    1.41
  -4 -16   4    9.14    1.37
   3  16  -4    0.04    1.20
  -3 -16   4    0.47    1.15
   2  16  -4    0.48    1.21
  -2 -16   4    0.60    1.08
   1  16  -4    8.81    1.44
  -1 -16   4    8.12    1.23
   0  16  -4    6.94    1.37
   0 -16   4    9.69    1.21
  -1  16  -4   10.61    1.50
   1 -16   4    9.54    1.20
  -2  16  -4    2.61    1.28
   2 -16   4    3.27    1.07
  -3  16  -4    3.80    1.32
  -4  16  -4   -0.94    1.20
  -5  16  -4   -0.90    1.24
  -6  16  -4    0.24    1.32
  -7  16  -4    0.78    1.34
  -8  16  -4    1.91    1.47
  -8 -15   4   -1.92    1.34
  -7 -15   4   -3.60    1.19
   6  15  -4   -0.56    1.13
  -6 -15   4   -0.13    1.21
   5  15  -4    0.78    1.15
  -5 -15   4    1.38    1.15
   4  15  -4    6.00    1.29
  -4 -15   4    6.01    1.23
   3  15  -4    0.70    1.14
  -3 -15   4    1.08    1.07
   2  15  -4    1.97    1.21
  -2 -15   4    0.58    1.01
   1  15  -4   12.11    1.47
  -1 -15   4   13.37    1.28
   0  15  -4   -0.37    1.12
   0 -15   4    0.71    0.97
  -1  15  -4    2.56    1.17
   1 -15   4    3.61    1.02
  -2  15  -4    8.01    1.36
   2 -15   4    8.28    1.14
  -3  15  -4   15.97    1.61
  -4  15  -4   -2.23    1.05
  -5  15  -4   -0.66    1.13
  -6  15  -4    3.18    1.29
  -7  15  -4    1.24    1.31
  -8  15  -4   -1.12    1.28
  -9  15  -4    2.44    1.43
  -9 -14   4    1.58    1.41
  -8 -14   4    2.21    1.34
   7  14  -4    3.67    1.26
  -7 -14   4    4.69    1.32
   6  14  -4    5.16    1.32
  -6 -14   4    4.89    1.27
   5  14  -4    0.54    1.06
  -5 -14   4    1.54    1.11
   4  14  -4    0.37    1.06
  -4 -14   4    0.71    1.06
   3  14  -4    1.31    1.14
  -3 -14   4    4.20    1.09
   2  14  -4    4.29    1.18
  -2 -14   4    6.04    1.11
   1  14  -4    2.93    1.14
  -1 -14   4    2.34    0.98
   0  14  -4   -0.18    1.03
   0 -14   4    3.20    0.96
  -1  14  -4   -0.31    1.01
   1 -14   4    1.25    0.92
  -2  14  -4   13.82    1.46
   2 -14   4   15.70    1.27
  -3  14  -4   29.92    2.02
  -4  14  -4    1.40    1.10
  -5  14  -4    4.03    1.28
  -6  14  -4    1.60    1.17
  -7  14  -4    1.09    1.20
  -8  14  -4    3.07    1.30
  -9  14  -4    1.54    1.34
 -10  14  -4   -1.01    1.33
 -10 -13   4    8.37    1.66
  -9 -13   4   -0.52    1.24
  -8 -13   4   -0.95    1.19
   7  13  -4   -0.05    1.01
  -7 -13   4    0.40    1.12
  -6 -13   4   17.23    1.54
   5  13  -4   -1.50    0.94
  -5 -13   4    0.05    1.02
   4  13  -4    3.28    1.10
  -4 -13   4    2.26    1.01
   3  13  -4    2.93    1.06
  -3 -13   4    2.30    0.98
   2  13  -4   20.21    1.68
  -2 -13   4   20.81    1.62
   1  13  -4   26.76    1.81
  -1 -13   4   26.91    1.67
   0  13  -4    1.96    1.00
   0 -13   4    2.24    0.91
  -1  13  -4   34.27    2.10
   1 -13   4   38.80    1.83
  -2  13  -4   34.81    2.01
   2 -13   4   35.84    1.81
  -3  13  -4   -0.44    0.96
  -4  13  -4   -0.20    0.99
  -5  13  -4    3.19    1.14
  -6  13  -4   14.48    1.52
  -7  13  -4    5.08    0.98
  -7  13  -4    6.29    1.31
  -8  13  -4    1.77    0.93
  -8  13  -4    1.80    1.21
  -9  13  -4    2.18    1.25
 -10  13  -4    1.31    1.28
 -11  13  -4   -1.28    1.31
 -11 -12   4    3.20    1.45
 -10 -12   4    2.95    1.41
  -9 -12   4    7.39    1.44
  -8 -12   4    1.43    1.19
   7  12  -4    0.62    0.95
  -7 -12   4    1.67    1.14
  -6 -12   4    2.15    1.07
   5  12  -4    1.08    0.96
  -5 -12   4    0.80    1.00
   4  12  -4    9.30    1.15
  -4 -12   4    9.29    1.16
   3  12  -4    8.37    1.18
  -3 -12   4    8.68    1.06
   2  12  -4    2.75    0.96
  -2 -12   4    2.85    0.92
   1  12  -4    3.64    0.95
  -1 -12   4    2.32    0.84
   0  12  -4   33.82    1.85
   0 -12   4   34.10    1.66
  -1  12  -4    5.18    1.02
   1 -12   4    6.32    0.93
  -2  12  -4    4.80    1.03
   2 -12   4    5.84    0.90
  -3  12  -4    2.52    0.96
  -4  12  -4   -0.53    0.92
  -4  12  -4    0.25    0.62
  -5  12  -4    1.83    0.73
  -5  12  -4    0.82    1.01
  -6  12  -4    5.69    1.21
  -6  12  -4    5.71    0.89
  -7  12  -4   18.47    1.50
  -7  12  -4   13.90    1.45
  -8  12  -4    0.83    1.13
  -9  12  -4    2.00    1.17
 -10  12  -4   26.45    2.08
 -10  12  -4   30.05    2.07
 -11  12  -4    1.12    1.27
 -11  12  -4    0.06    1.15
 -11 -11   4    1.51    1.33
 -10 -11   4    4.39    1.37
  -9 -11   4    0.47    1.15
  -8 -11   4    7.02    1.33
   7  11  -4    0.10    0.87
  -7 -11   4    2.78    1.09
   6  11  -4   35.19    1.85
  -6 -11   4   33.29    1.95
  -5 -11   4   -0.83    0.88
   4  11  -4   11.07    1.15
  -4 -11   4   12.11    1.14
   3  11  -4   21.88    1.56
  -3 -11   4   21.48    1.44
   2  11  -4    0.26    0.78
  -2 -11   4    0.15    0.71
   1  11  -4    2.68    0.85
  -1 -11   4    1.94    0.75
   0  11  -4    0.67    0.78
   0 -11   4    1.87    0.74
  -1  11  -4    1.85    0.81
   1 -11   4    2.57    0.73
  -2  11  -4    0.11    0.73
   2 -11   4   -0.48    0.69
  -3  11  -4    0.51    0.79
  -3  11  -4    0.46    0.51
  -4  11  -4    2.51    0.93
  -4  11  -4    0.88    0.60
  -5  11  -4    1.06    0.67
  -5  11  -4    0.42    0.92
  -6  11  -4   19.17    1.74
  -6  11  -4   22.13    1.47
  -7  11  -4    1.84    1.05
  -7  11  -4    0.66    0.83
  -8  11  -4    1.02    1.03
  -9  11  -4   -0.85    1.02
  -9  11  -4    0.11    0.95
 -10  11  -4   29.02    2.00
 -10  11  -4   26.24    2.01
 -11  11  -4   -1.42    1.11
 -11  11  -4    1.07    1.17
 -12  11  -4    1.62    1.32
 -12 -10   4   -0.75    1.30
 -11 -10   4    8.90    1.51
 -10 -10   4    0.35    1.11
  -9 -10   4    3.39    1.15
  -8 -10   4    3.23    1.12
   7  10  -4    0.95    0.82
  -7 -10   4    0.61    1.00
   6  10  -4   10.69    1.10
  -6 -10   4   13.27    1.25
  -5 -10   4   36.97    1.37
  -5 -10   4   39.24    1.86
   4  10  -4   14.99    1.34
  -4 -10   4   15.74    1.34
   3  10  -4   13.31    1.24
  -3 -10   4   15.61    1.24
   2  10  -4   15.16    1.24
  -2 -10   4   14.76    1.18
   1  10  -4    3.39    0.79
  -1 -10   4    2.83    0.71
   0  10  -4    2.26    0.72
   0 -10   4    2.59    0.68
  -1  10  -4   14.03    1.27
   1 -10   4   14.15    1.14
  -2  10  -4    7.20    0.91
  -2  10  -4    8.56    0.70
   2 -10   4    8.09    0.83
  -3  10  -4    5.37    0.87
  -3  10  -4    5.57    0.57
  -4  10  -4    5.01    0.91
  -4  10  -4    4.80    0.63
  -5  10  -4    1.00    0.65
  -5  10  -4    0.20    0.81
  -6  10  -4   -0.42    0.88
  -6  10  -4   -0.06    0.70
  -7  10  -4    0.72    0.96
  -8  10  -4    9.18    1.22
  -9  10  -4    2.62    1.04
  -9  10  -4    1.37    1.00
 -10  10  -4    4.69    1.18
 -10  10  -4    5.15    1.19
 -11  10  -4   -0.48    1.09
 -11  10  -4    0.50    1.08
 -12  10  -4   -0.34    1.20
 -12  -9   4    0.91    1.28
 -11  -9   4    8.31    1.39
 -10  -9   4   -0.30    0.88
 -10  -9   4   -0.12    1.13
  -9  -9   4    2.68    1.13
  -9  -9   4    3.33    0.83
  -8  -9   4    1.55    1.03
  -8  -9   4    2.67    0.75
   7   9  -4    1.81    0.78
  -7  -9   4    1.43    0.65
  -7  -9   4    0.74    0.95
   6   9  -4   -0.94    0.71
  -6  -9   4    0.22    0.81
  -6  -9   4   -0.46    0.52
  -5  -9   4   14.25    0.82
  -5  -9   4   14.60    1.33
  -4  -9   4   -0.38    0.67
   3   9  -4   18.19    1.22
  -3  -9   4   18.19    1.22
   2   9  -4   16.82    1.22
  -2  -9   4   18.47    1.16
   1   9  -4   30.81    1.50
  -1  -9   4   30.00    1.36
   0   9  -4   13.07    1.11
   0  -9   4   13.01    1.05
  -1   9  -4   39.25    1.70
   1  -9   4   40.75    1.53
  -2   9  -4   15.51    0.76
  -2   9  -4   14.45    1.17
   2  -9   4   14.12    1.09
  -3   9  -4    4.82    0.77
  -3   9  -4    5.22    0.55
  -4   9  -4   23.62    1.16
  -4   9  -4   23.14    1.41
  -5   9  -4    6.77    0.77
  -5   9  -4    6.88    0.93
  -6   9  -4    9.15    1.06
  -6   9  -4    8.06    0.92
  -7   9  -4    2.75    0.94
  -8   9  -4    2.27    0.91
  -8   9  -4    1.91    0.95
  -9   9  -4    0.22    0.94
  -9   9  -4    1.58    0.95
 -10   9  -4    8.35    1.26
 -10   9  -4    7.55    1.21
 -11   9  -4    1.68    1.05
 -11   9  -4    1.35    1.14
 -12   9  -4    0.97    1.22
 -13   9  -4    2.57    1.39
 -13  -8   4   15.34    1.64
 -13  -8   4   13.33    1.74
 -12  -8   4    9.60    1.56
 -12  -8   4    6.68    1.27
 -11  -8   4    2.02    1.04
 -11  -8   4    4.08    1.26
 -10  -8   4   -0.70    0.87
 -10  -8   4   -1.67    1.05
  -9  -8   4    5.49    1.14
  -9  -8   4    6.02    0.92
  -8  -8   4   37.67    2.01
  -8  -8   4   37.39    1.67
   7   8  -4   88.14    2.62
  -7  -8   4   83.91    2.87
  -7  -8   4   86.03    2.59
   6   8  -4   24.79    1.30
  -6  -8   4   27.17    1.56
  -6  -8   4   24.69    1.17
   5   8  -4    0.64    0.61
  -5  -8   4    2.24    0.71
  -5  -8   4    1.03    0.43
  -4  -8   4   15.90    1.18
  -4  -8   4   15.53    0.71
   3   8  -4    1.32    0.60
  -3  -8   4    1.40    0.61
   2   8  -4   30.67    1.39
  -2  -8   4   28.45    1.29
   1   8  -4   28.18    1.35
  -1  -8   4   27.88    1.27
   0   8  -4    1.15    0.60
   0  -8   4    1.37    0.57
  -1   8  -4    0.71    0.57
   1  -8   4    0.30    0.54
  -2   8  -4    3.06    0.40
  -2   8  -4    3.39    0.71
   2  -8   4    2.97    0.64
  -3   8  -4    2.17    0.68
  -3   8  -4    1.31    0.43
  -4   8  -4   41.52    1.46
  -4   8  -4   39.12    1.73
  -5   8  -4    1.12    0.67
  -5   8  -4    1.30    0.56
  -6   8  -4    8.95    0.99
  -7   8  -4   -0.94    0.72
  -7   8  -4   -0.27    0.71
  -8   8  -4   -0.34    0.80
  -8   8  -4   -1.27    0.80
  -9   8  -4    0.97    0.89
  -9   8  -4    2.67    1.00
 -10   8  -4    0.77    0.99
 -10   8  -4    0.41    0.93
 -11   8  -4    3.38    1.01
 -11   8  -4    2.56    1.14
 -12   8  -4    0.83    1.21
 -13   8  -4    0.28    1.29
 -13  -7   4    9.47    1.49
 -13  -7   4   11.17    1.67
 -12  -7   4    1.25    1.32
 -12  -7   4    1.75    1.12
 -11  -7   4    7.88    1.41
 -11  -7   4    6.08    1.16
 -10  -7   4   25.28    1.71
 -10  -7   4   25.53    1.95
  -9  -7   4   -0.03    0.97
  -9  -7   4    0.00    0.77
  -8  -7   4   22.35    1.37
  -8  -7   4   19.83    1.66
   7   7  -4   30.30    1.33
  -7  -7   4   28.47    1.67
  -7  -7   4   28.87    1.35
   6   7  -4    8.35    0.74
  -6  -7   4    6.19    0.87
  -6  -7   4    7.87    0.67
   5   7  -4   54.18    1.83
  -5  -7   4   52.37    1.96
  -5  -7   4   55.79    1.65
  -4  -7   4   15.30    0.73
  -4  -7   4   16.49    1.14
   3   7  -4   66.82    2.05
  -3  -7   4   58.90    1.99
   2   7  -4    6.77    0.72
  -2  -7   4    6.48    0.71
   1   7  -4    0.15    0.51
  -1  -7   4   -0.49    0.51
   0   7  -4  226.77    5.85
   0  -7   4  230.60    5.51
  -1   7  -4    7.03    0.73
   1  -7   4    6.91    0.69
  -2   7  -4   62.59    1.70
  -2   7  -4   59.19    2.03
   2  -7   4   58.74    1.86
  -3   7  -4   49.09    1.51
  -3   7  -4   46.31    1.80
  -4   7  -4   13.07    0.88
  -4   7  -4   12.80    1.11
  -5   7  -4    6.96    0.82
  -5   7  -4    6.65    0.68
  -6   7  -4    9.67    0.93
  -7   7  -4   26.68    1.50
  -7   7  -4   25.21    1.49
  -8   7  -4   20.02    1.50
  -8   7  -4   21.23    1.60
  -9   7  -4    1.20    0.96
  -9   7  -4    0.90    0.84
 -10   7  -4    2.13    1.07
 -10   7  -4    1.55    0.89
 -11   7  -4    4.96    1.25
 -11   7  -4    3.22    0.98
 -12   7  -4   -1.81    1.18
 -13   7  -4   -1.15    1.26
 -13  -6   4   -0.01    1.21
 -12  -6   4    1.21    1.10
 -11  -6   4   13.67    1.34
 -10  -6   4   -0.09    0.89
  -9  -6   4    0.27    0.79
  -8  -6   4    0.65    0.65
  -8  -6   4   -0.44    0.89
   7   6  -4    0.82    0.51
  -7  -6   4    1.36    0.82
  -7  -6   4    1.63    0.56
   6   6  -4   19.52    0.99
  -6  -6   4   18.85    1.30
  -6  -6   4   17.61    0.98
   5   6  -4    7.21    0.64
  -5  -6   4    5.72    0.75
  -5  -6   4    8.77    0.72
   4   6  -4   92.95    2.60
  -4  -6   4   93.16    2.66
  -4  -6   4   91.42    2.42
  -3  -6   4    0.72    0.55
   2   6  -4   12.89    0.94
  -2  -6   4   10.96    0.96
   1   6  -4   13.35    0.99
  -1  -6   4   11.37    0.93
   0   6  -4  130.51    3.57
   0  -6   4  132.99    3.35
  -1   6  -4   73.48    2.23
   1  -6   4   68.56    2.04
  -2   6  -4   -0.09    0.52
  -2   6  -4    0.48    0.34
   2  -6   4    1.08    0.53
  -3   6  -4   69.54    1.98
  -3   6  -4   71.85    2.25
  -4   6  -4  163.92    4.34
  -4   6  -4  158.12    4.15
  -5   6  -4    2.49    0.44
  -5   6  -4    5.78    0.74
  -6   6  -4   12.27    1.11
  -6   6  -4   12.50    1.05
  -7   6  -4   30.28    1.52
  -7   6  -4   31.98    1.51
  -8   6  -4    6.16    0.96
  -8   6  -4    5.22    0.84
  -9   6  -4    1.22    0.79
  -9   6  -4   -0.66    0.88
 -10   6  -4    1.01    0.83
 -10   6  -4   -1.57    0.98
 -11   6  -4    1.41    1.13
 -11   6  -4    1.11    0.90
 -12   6  -4    4.85    1.35
 -13   6  -4   29.23    2.41
 -14   6  -4    2.20    1.49
 -14  -5   4    1.81    1.38
 -13  -5   4    0.34    1.20
 -12  -5   4    1.06    1.11
 -11  -5   4   18.62    1.50
 -10  -5   4   16.51    1.35
  -9  -5   4   14.51    1.34
  -8  -5   4   13.31    1.18
  -7  -5   4   -1.12    0.51
  -7  -5   4    0.02    0.74
   6   5  -4   24.57    1.01
  -6  -5   4   23.50    1.37
  -6  -5   4   23.75    1.08
   5   5  -4   21.03    0.95
  -5  -5   4   19.67    0.90
  -5  -5   4   20.41    1.21
   4   5  -4  161.02    4.10
  -4  -5   4  157.43    3.99
  -4  -5   4  162.94    4.11
  -3  -5   4   33.76    1.01
   2   5  -4   19.38    0.98
  -2  -5   4   19.35    1.02
   1   5  -4   21.73    1.02
  -1  -5   4   20.72    0.99
   0   5  -4   -0.18    0.42
   0  -5   4   -0.08    0.41
  -1   5  -4   79.73    2.31
   1  -5   4   76.98    2.13
  -2   5  -4   26.49    1.19
  -2   5  -4   27.44    0.92
   2  -5   4   26.18    1.10
  -3   5  -4    1.43    0.43
  -3   5  -4    2.13    0.59
  -4   5  -4   18.73    1.11
  -4   5  -4   17.62    0.97
  -5   5  -4   16.14    1.07
  -6   5  -4    4.54    0.65
  -6   5  -4    4.19    0.68
  -7   5  -4    2.73    0.65
  -8   5  -4   55.20    2.15
  -8   5  -4   57.12    2.04
  -9   5  -4   20.69    1.69
  -9   5  -4   22.50    1.42
 -10   5  -4    2.93    1.05
 -10   5  -4    3.65    0.85
 -11   5  -4    2.39    1.14
 -12   5  -4    8.80    1.42
 -13   5  -4   -1.33    1.18
 -14   5  -4    3.94    1.50
 -14  -4   4    0.80    1.31
 -13  -4   4   11.02    1.51
 -12  -4   4   39.12    2.28
 -11  -4   4    3.30    1.05
 -10  -4   4    0.34    0.86
  -9  -4   4   22.56    1.50
  -8  -4   4    0.73    0.63
  -7  -4   4    8.58    0.76
   6   4  -4   19.55    0.87
  -6  -4   4   21.37    1.05
  -6  -4   4   21.05    1.29
   5   4  -4   29.55    1.06
  -5  -4   4   30.22    1.13
  -5  -4   4   30.09    1.38
   4   4  -4   56.77    1.67
  -4  -4   4   56.26    1.61
  -4  -4   4   55.74    1.83
   3   4  -4   38.41    1.30
  -3  -4   4   38.91    1.13
  -3  -4   4   39.85    1.40
   2   4  -4   15.97    0.81
  -2  -4   4   16.11    0.85
   1   4  -4   11.52    0.72
  -1  -4   4   11.85    0.74
   0   4  -4   14.77    0.80
   0  -4   4   13.74    0.76
  -1   4  -4   19.46    0.62
  -2   4  -4  141.66    3.60
  -2   4  -4  150.26    3.81
  -3   4  -4   17.80    0.82
  -3   4  -4   18.58    0.98
  -4   4  -4    2.82    0.60
  -5   4  -4   23.76    1.16
  -5   4  -4   24.28    1.19
  -6   4  -4    0.09    0.51
  -6   4  -4    0.90    0.55
  -7   4  -4   -0.46    0.50
  -7   4  -4    0.19    0.59
  -8   4  -4   31.38    1.61
  -8   4  -4   33.25    1.47
  -9   4  -4   33.06    1.53
  -9   4  -4   33.33    1.81
 -10   4  -4    2.68    0.77
 -10   4  -4    2.60    1.00
 -11   4  -4    0.83    1.04
 -12   4  -4    7.13    1.34
 -13   4  -4    0.93    1.25
 -14   4  -4    1.37    1.39
 -14  -3   4    7.48    1.49
 -13  -3   4    4.18    1.30
 -12  -3   4    5.97    1.25
 -11  -3   4   34.94    2.03
 -10  -3   4    6.26    1.04
  -9  -3   4    0.57    0.74
  -8  -3   4    9.30    0.90
  -7  -3   4   12.08    0.96
  -6  -3   4    1.19    0.48
   5   3  -4    0.11    0.33
  -5  -3   4    0.54    0.63
  -5  -3   4   -0.03    0.44
   4   3  -4   39.83    1.25
  -4  -3   4   39.46    1.27
  -4  -3   4   40.14    1.47
   3   3  -4   14.75    0.71
  -3  -3   4   13.41    0.84
  -3  -3   4   14.80    0.64
  -2  -3   4   -0.08    0.34
   1   3  -4   60.39    1.71
  -1  -3   4   59.21    1.67
   0   3  -4  105.43    2.76
   0  -3   4  104.87    2.64
  -1   3  -4   97.98    2.42
  -1   3  -4  101.52    2.64
   1  -3   4   96.35    2.49
  -2   3  -4   75.26    1.97
  -2   3  -4   76.86    2.15
  -3   3  -4   48.28    1.58
  -3   3  -4   51.91    1.47
  -4   3  -4   -0.28    0.43
  -5   3  -4   27.20    1.19
  -5   3  -4   26.19    1.20
  -6   3  -4    5.30    0.67
  -6   3  -4    4.88    0.62
  -7   3  -4    9.32    0.86
  -7   3  -4    8.37    0.75
  -8   3  -4    0.17    0.54
  -8   3  -4   -0.16    0.67
  -9   3  -4    0.39    0.59
  -9   3  -4    0.35    0.79
 -10   3  -4   10.05    0.93
 -10   3  -4   10.10    1.17
 -11   3  -4   11.71    1.35
 -12   3  -4   14.71    1.53
 -13   3  -4    8.34    1.48
 -14   3  -4   -0.36    1.30
 -14  -2   4    0.27    1.26
 -13  -2   4   -0.90    1.14
 -12  -2   4   10.59    1.37
 -11  -2   4    3.72    1.06
 -10  -2   4    9.53    1.12
  -9  -2   4    2.64    0.82
  -8  -2   4   -0.76    0.58
  -7  -2   4    5.85    0.68
  -6  -2   4    0.97    0.50
  -5  -2   4   13.76    0.87
   4   2  -4  118.63    2.93
  -4  -2   4  115.73    3.06
  -4  -2   4  117.84    3.04
   3   2  -4  161.52    3.92
  -3  -2   4  160.75    3.91
  -3  -2   4  157.71    3.94
  -2  -2   4   22.91    0.89
  -2  -2   4   21.63    0.70
   1   2  -4   56.57    1.61
  -1  -2   4   58.23    1.60
   0   2  -4    2.46    0.41
   0  -2   4    2.72    0.44
  -1   2  -4  132.73    3.19
  -1   2  -4  131.60    3.34
   1  -2   4  129.06    3.18
  -2   2  -4    8.70    0.51
  -2   2  -4    7.73    0.62
  -3   2  -4   34.64    1.19
  -4   2  -4    7.75    0.69
  -4   2  -4    8.47    0.70
  -5   2  -4   36.90    1.32
  -5   2  -4   34.09    1.36
  -6   2  -4    3.64    0.60
  -6   2  -4    3.69    0.54
  -7   2  -4    2.20    0.52
  -7   2  -4    1.53    0.59
  -8   2  -4   18.86    1.28
  -8   2  -4   17.82    1.04
  -9   2  -4    0.94    0.58
  -9   2  -4    0.97    0.78
 -10   2  -4   -0.44    0.61
 -10   2  -4    0.23    0.89
 -11   2  -4   11.54    1.31
 -12   2  -4   21.27    1.94
 -13   2  -4   13.61    1.57
 -14   2  -4    1.22    1.34
 -15   2  -4   -0.28    1.44
 -14  -1   4    0.28    1.25
 -13  -1   4    1.15    1.20
 -12  -1   4   -0.14    1.05
 -11  -1   4    8.53    1.23
 -10  -1   4    4.57    1.01
  -9  -1   4   13.79    1.13
  -8  -1   4    0.93    0.60
  -7  -1   4    7.84    0.75
  -6  -1   4   70.02    2.14
  -5  -1   4  118.63    3.17
   4   1  -4   33.06    0.94
  -4  -1   4   33.88    1.24
  -4  -1   4   30.95    1.11
   3   1  -4   14.96    0.58
  -3  -1   4   15.01    0.77
  -3  -1   4   14.02    0.64
   2   1  -4  517.47   11.84
  -2  -1   4  495.48   11.88
  -2  -1   4  496.01   11.40
   1   1  -4    0.01    0.37
  -1  -1   4    0.26    0.42
  -1  -1   4    0.39    0.22
   0   1  -4   13.53    0.77
   0  -1   4   14.16    0.81
  -1   1  -4   15.53    0.83
   1  -1   4   15.79    0.84
  -2   1  -4  104.51    2.73
  -3   1  -4    2.46    0.39
  -3   1  -4    2.92    0.37
  -4   1  -4   34.21    1.21
  -4   1  -4   36.02    1.20
  -5   1  -4    1.00    0.46
  -5   1  -4    2.21    0.45
  -6   1  -4   17.12    0.91
  -6   1  -4   16.23    1.07
  -7   1  -4   27.46    1.13
  -7   1  -4   26.64    1.33
  -8   1  -4    3.64    0.70
  -8   1  -4    3.42    0.55
  -9   1  -4    7.20    0.69
  -9   1  -4    5.91    0.89
 -10   1  -4   19.69    1.18
 -10   1  -4   21.97    1.65
 -11   1  -4    2.28    1.04
 -12   1  -4    2.82    1.11
 -13   1  -4    0.83    1.15
 -14   1  -4   11.43    1.63
 -15   1  -4    6.31    1.64
 -14   0   4    0.81    1.26
 -13   0   4   18.18    1.71
 -12   0   4    7.52    1.29
 -11   0   4   58.46    2.57
  -9   0   4   10.48    1.03
  -8   0   4   79.19    2.54
  -7   0   4   46.42    1.73
  -6   0   4   -0.35    0.47
  -5   0   4    8.43    0.77
   4   0  -4    9.88    0.42
  -4   0   4   11.28    0.65
   3   0  -4  207.20    4.99
  -3   0   4  212.10    5.13
  -3   0   4  209.48    4.93
   2   0  -4  716.48   15.85
  -2   0   4  686.99   15.23
  -2   0   4  628.03   15.96
  -1   0   4   10.96    0.54
  -1   0   4   11.91    0.74
   0   0  -4   63.36    1.73
   0   0   4   61.03    1.65
  -1   0  -4   17.46    0.84
  -2   0  -4  143.00    3.58
  -3   0  -4   35.37    1.14
  -3   0  -4   35.09    1.13
  -4   0  -4   19.53    0.85
  -4   0  -4   19.45    0.82
  -5   0  -4   36.99    1.35
  -5   0  -4   37.37    1.24
  -6   0  -4  146.04    3.71
  -6   0  -4  143.06    3.87
  -7   0  -4   20.31    1.18
  -7   0  -4   20.91    0.96
  -8   0  -4   87.67    2.43
  -8   0  -4   85.46    2.72
  -9   0  -4    5.90    0.62
  -9   0  -4    6.12    0.88
 -10   0  -4   -0.35    0.53
 -10   0  -4   -0.31    0.79
 -11   0  -4   21.80    1.77
 -12   0  -4    2.25    1.10
 -13   0  -4    2.49    1.19
 -14   0  -4   -0.16    1.24
 -15   0  -4    1.00    1.41
 -15   1   4   -1.19    1.36
 -14   1   4   -1.53    1.18
 -13   1   4   15.50    1.60
 -12   1   4    5.51    1.21
 -11   1   4   30.44    1.95
 -10   1   4    2.78    0.90
  -9   1   4   14.49    1.33
  -8   1   4    3.89    0.70
  -7   1   4    1.19    0.55
  -6   1   4   75.53    2.30
  -5   1   4   14.40    0.87
  -4   1   4   32.66    1.12
   3  -1  -4   44.14    1.18
  -3   1   4   41.32    1.28
  -3   1   4   43.22    1.30
   2  -1  -4    2.54    0.38
  -2   1   4    2.26    0.38
  -2   1   4    2.72    0.44
  -1   1   4   32.65    1.02
  -1   1   4   35.40    1.06
   0  -1  -4   24.82    0.90
   0   1   4   25.08    0.84
   0   1   4   24.89    0.79
  -1  -1  -4   22.82    0.91
  -2  -1  -4   39.71    1.29
  -3  -1  -4   25.79    0.94
  -4  -1  -4   43.70    1.32
  -4  -1  -4   43.56    1.38
  -5  -1  -4    0.89    0.42
  -5  -1  -4    0.79    0.37
  -6  -1  -4    4.87    0.62
  -6  -1  -4    5.02    0.51
  -7  -1  -4    1.30    0.39
  -7  -1  -4    0.94    0.51
  -8  -1  -4    8.99    0.83
  -8  -1  -4    9.13    0.76
  -9  -1  -4    9.04    0.78
  -9  -1  -4    8.45    0.94
 -10  -1  -4   41.12    1.98
 -11  -1  -4   23.57    1.79
 -12  -1  -4    1.89    1.08
 -13  -1  -4    6.94    1.37
 -14  -1  -4   -0.82    1.19
 -15  -1  -4   -0.56    1.35
 -15   2   4    5.82    1.56
 -14   2   4   -0.13    1.21
 -13   2   4    3.02    1.17
 -12   2   4    1.84    1.05
 -11   2   4   -0.07    0.89
 -10   2   4    1.67    0.85
  -9   2   4    0.05    0.68
  -8   2   4    8.46    0.84
  -7   2   4    4.59    0.63
  -6   2   4   57.82    1.91
  -5   2   4   70.96    2.10
   4  -2  -4    8.75    0.47
  -4   2   4    8.06    0.67
   3  -2  -4   30.04    0.93
  -3   2   4   30.75    1.06
   2  -2  -4    7.87    0.63
  -2   2   4    8.87    0.65
  -1   2   4  143.93    3.55
   0  -2  -4  275.80    6.61
   0   2   4  276.51    6.60
  -1  -2  -4    0.54    0.41
  -2  -2  -4   22.59    0.98
  -3  -2  -4  113.86    2.90
  -4  -2  -4    6.71    0.64
  -4  -2  -4    5.75    0.55
  -5  -2  -4   17.93    0.81
  -5  -2  -4   17.93    0.94
  -6  -2  -4   12.02    0.75
  -6  -2  -4   11.70    0.93
  -7  -2  -4    1.93    0.54
  -7  -2  -4    1.91    0.42
  -8  -2  -4   -0.84    0.40
  -8  -2  -4    1.14    0.58
  -9  -2  -4   10.32    0.79
  -9  -2  -4   10.07    0.96
 -10  -2  -4    2.86    0.84
 -11  -2  -4   -1.76    0.84
 -12  -2  -4    2.37    1.05
 -13  -2  -4    4.46    1.22
 -14  -2  -4    0.32    1.25
 -15  -2  -4    0.91    1.36
 -14   3   4    9.39    1.55
 -13   3   4   22.04    2.03
 -12   3   4    1.67    1.04
 -11   3   4    0.48    0.90
 -10   3   4    0.58    0.79
  -9   3   4    0.46    0.67
  -8   3   4   19.65    1.24
  -7   3   4    8.27    0.76
  -6   3   4   12.58    0.98
  -5   3   4   -0.03    0.42
  -4   3   4    0.37    0.35
  -3   3   4    3.32    0.42
  -2   3   4    3.75    0.42
   1  -3  -4    2.73    0.49
  -1   3   4    2.85    0.41
   0  -3  -4  154.82    3.90
   0   3   4  160.45    3.89
  -1  -3  -4   40.02    1.33
  -2  -3  -4    8.08    0.60
  -3  -3  -4   13.68    0.71
  -4  -3  -4   -0.19    0.31
  -5  -3  -4    0.42    0.44
  -5  -3  -4    0.36    0.36
  -6  -3  -4   -0.16    0.37
  -6  -3  -4    0.11    0.47
  -7  -3  -4    2.62    0.57
  -7  -3  -4    2.43    0.42
  -8  -3  -4  187.77    4.98
  -8  -3  -4  181.80    4.62
  -9  -3  -4   39.52    1.37
  -9  -3  -4   40.30    1.78
 -10  -3  -4   32.14    1.79
 -11  -3  -4   39.43    2.10
 -12  -3  -4    0.39    1.02
 -13  -3  -4   -0.45    1.07
 -14  -3  -4    1.59    1.28
 -15  -3  -4    2.26    1.43
 -14   4   4    0.43    1.29
 -13   4   4    7.49    1.35
 -12   4   4    0.83    1.05
 -11   4   4   -0.76    0.88
 -10   4   4    7.04    1.03
  -9   4   4    4.28    0.80
  -8   4   4   10.36    0.91
  -7   4   4   25.68    1.28
  -6   4   4   29.64    1.32
  -6   4   4   28.66    0.95
  -5   4   4   -0.20    0.29
  -5   4   4    0.68    0.50
  -4   4   4   65.98    1.94
  -4   4   4   66.28    1.78
  -3   4   4   40.26    1.19
  -3   4   4   41.23    1.31
  -2   4   4  152.86    3.85
  -2   4   4  153.22    3.79
  -1   4   4    6.38    0.61
  -1   4   4    6.90    0.66
   0   4   4   12.74    0.74
   0   4   4   12.37    0.75
  -1  -4  -4  196.56    4.85
  -2  -4  -4  247.38    6.01
  -3  -4  -4   27.01    1.02
  -4  -4  -4    5.42    0.49
  -5  -4  -4   17.49    0.87
  -5  -4  -4   16.83    0.99
  -6  -4  -4    0.35    0.40
  -6  -4  -4    0.16    0.49
  -7  -4  -4    3.78    0.59
  -7  -4  -4    4.29    0.50
  -8  -4  -4  134.06    3.75
  -8  -4  -4  130.44    3.41
  -9  -4  -4   54.34    1.69
  -9  -4  -4   55.43    2.13
 -10  -4  -4   80.72    2.81
 -11  -4  -4    2.75    0.97
 -12  -4  -4   29.97    2.02
 -13  -4  -4    1.85    1.14
 -14  -4  -4    0.02    1.24
 -15  -4  -4    4.32    1.53
 -14   5   4    4.20    1.43
 -13   5   4    0.01    1.18
 -12   5   4    8.14    1.30
 -11   5   4    1.83    0.99
 -10   5   4   24.24    1.72
  -9   5   4   18.66    1.44
  -8   5   4    8.43    0.92
  -7   5   4    9.17    0.82
  -7   5   4    9.87    0.65
  -6   5   4   12.94    0.71
  -5   5   4  147.71    3.71
  -5   5   4  147.14    3.93
  -4   5   4    3.50    0.39
  -4   5   4    3.06    0.49
  -3   5   4    9.81    0.59
  -3   5   4   10.30    0.68
  -2   5   4    1.37    0.34
  -2   5   4    1.95    0.34
  -1   5   4    0.68    0.36
  -1   5   4    0.54    0.33
   0   5   4   54.76    1.61
   0   5   4   57.31    1.65
   1   5   4  458.56   10.91
   2   5   4  576.90   13.64
  -3  -5  -4    9.08    0.71
  -4  -5  -4   49.40    1.54
  -5  -5  -4   45.96    1.52
  -6  -5  -4    9.65    0.80
  -6  -5  -4   10.78    0.94
  -7  -5  -4   17.48    0.89
  -7  -5  -4   16.50    1.13
  -8  -5  -4    1.75    0.62
  -8  -5  -4    2.49    0.49
  -9  -5  -4    6.60    0.59
  -9  -5  -4    5.58    0.85
 -10  -5  -4    0.31    0.79
 -11  -5  -4   44.45    2.21
 -12  -5  -4   10.22    1.31
 -13  -5  -4    4.24    1.19
 -14  -5  -4    0.09    1.23
 -15  -5  -4    0.50    1.38
 -14   6   4    6.06    1.51
 -13   6   4    5.73    1.32
 -12   6   4    9.36    1.37
 -11   6   4   66.77    2.78
 -10   6   4    9.68    1.18
  -9   6   4    2.35    0.82
  -8   6   4    1.36    0.64
  -8   6   4    1.25    0.41
  -7   6   4   22.55    1.25
  -7   6   4   19.84    0.94
  -6   6   4    9.28    0.81
  -6   6   4    9.80    0.73
  -5   6   4   28.94    1.10
  -5   6   4   24.89    1.25
  -4   6   4    0.18    0.42
  -4   6   4   -0.06    0.36
  -3   6   4    1.06    0.36
  -3   6   4    0.92    0.39
  -2   6   4    0.41    0.32
  -2   6   4    0.16    0.31
  -1   6   4   48.22    1.46
  -1   6   4   49.90    1.50
   0   6   4   34.91    1.20
   0   6   4   34.73    1.14
   1   6   4  235.23    5.78
   2   6   4    4.59    0.46
   3   6   4    6.83    0.65
  -4  -6  -4   18.00    0.96
  -5  -6  -4    4.72    0.60
  -6  -6  -4   10.43    0.85
  -6  -6  -4   13.52    0.99
  -7  -6  -4    0.06    0.52
  -7  -6  -4    0.43    0.46
  -8  -6  -4   35.58    1.33
  -8  -6  -4   35.95    1.59
  -9  -6  -4   31.24    1.26
  -9  -6  -4   30.18    1.64
 -10  -6  -4   18.28    1.54
 -11  -6  -4   13.52    1.30
 -12  -6  -4    0.25    1.01
 -13  -6  -4    0.22    1.12
 -14  -6  -4    1.47    1.26
 -14   7   4    2.29    1.40
 -13   7   4    1.39    1.24
 -12   7   4    1.68    1.14
 -11   7   4    0.65    0.99
 -10   7   4    1.35    0.92
  -9   7   4   19.23    1.08
  -9   7   4   17.89    1.49
  -8   7   4    7.72    0.90
  -8   7   4    6.66    0.65
  -7   7   4    0.81    0.60
  -7   7   4    0.72    0.43
  -6   7   4   82.97    2.35
  -6   7   4   81.96    2.54
  -5   7   4  157.86    4.29
  -5   7   4  165.82    4.17
  -4   7   4    2.59    0.56
  -4   7   4    3.58    0.53
  -3   7   4  100.20    2.77
  -3   7   4  101.20    2.74
  -2   7   4   53.45    1.66
  -2   7   4   56.62    1.70
  -1   7   4   71.19    1.99
  -1   7   4   70.95    2.06
   0   7   4    0.57    0.36
   0   7   4   -0.16    0.32
   1   7   4   55.16    1.70
   2   7   4  100.30    2.74
   3   7   4   90.57    2.52
   4   7   4    1.25    0.58
  -5  -7  -4   28.52    1.25
  -6  -7  -4    1.65    0.60
  -6  -7  -4    3.33    0.59
  -7  -7  -4    1.08    0.55
  -7  -7  -4    0.25    0.52
  -8  -7  -4   19.93    1.32
  -8  -7  -4   20.94    1.09
  -9  -7  -4   56.41    2.19
  -9  -7  -4   56.77    1.85
 -10  -7  -4    0.49    0.86
 -11  -7  -4   23.10    1.81
 -12  -7  -4    7.06    1.22
 -13  -7  -4   -0.08    1.12
 -14  -7  -4    2.48    1.28
 -14   8   4    2.54    1.46
 -13   8   4   -0.29    1.21
 -12   8   4   28.27    2.17
 -11   8   4    4.10    1.12
 -10   8   4   13.48    1.31
  -9   8   4    0.33    0.83
  -9   8   4   -1.07    0.53
  -8   8   4    4.53    0.63
  -8   8   4    4.02    0.82
  -7   8   4    1.60    0.64
  -7   8   4    0.54    0.48
  -6   8   4    7.82    0.80
  -6   8   4    7.72    0.69
  -5   8   4   18.68    1.11
  -5   8   4   17.12    1.02
  -4   8   4   92.72    2.63
  -4   8   4   91.11    2.66
  -3   8   4    0.48    0.48
  -2   8   4    2.50    0.47
  -2   8   4    1.93    0.49
  -1   8   4   -0.17    0.35
  -1   8   4    0.25    0.41
   0   8   4   51.97    1.68
   0   8   4   49.84    1.56
   1   8   4   56.98    1.80
   2   8   4   21.87    1.07
   3   8   4   35.96    1.43
   4   8   4   64.82    2.03
  -6  -8  -4   16.81    1.07
  -7  -8  -4   26.68    1.37
  -7  -8  -4   26.93    1.27
  -8  -8  -4    1.86    0.64
  -8  -8  -4    1.84    0.72
  -9  -8  -4    8.49    1.02
  -9  -8  -4    9.10    0.84
 -10  -8  -4    1.17    0.91
 -11  -8  -4    0.30    0.93
 -12  -8  -4    2.23    1.09
 -13  -8  -4   -2.26    1.09
 -14  -8  -4   -0.04    1.20
 -14   9   4    2.95    1.47
 -13   9   4    1.46    1.31
 -12   9   4    5.25    1.29
 -11   9   4    7.66    1.25
 -10   9   4    1.33    1.01
  -9   9   4    0.66    0.86
  -9   9   4    0.94    0.64
  -8   9   4   11.47    1.10
  -8   9   4    8.84    1.02
  -7   9   4   -0.55    0.60
  -7   9   4   -0.53    0.51
  -6   9   4   52.75    1.80
  -6   9   4   48.60    1.85
  -5   9   4    0.71    0.53
  -5   9   4    0.30    0.48
  -4   9   4  103.13    2.99
  -4   9   4  108.15    3.00
  -3   9   4   35.13    1.42
  -3   9   4   35.15    1.40
  -2   9   4    1.80    0.49
  -2   9   4    0.83    0.50
  -1   9   4    0.66    0.46
  -1   9   4    1.35    0.55
   0   9   4    6.20    0.59
   0   9   4    5.70    0.67
   1   9   4    8.31    0.75
   2   9   4   37.02    1.49
   3   9   4   49.50    1.77
   4   9   4    3.54    0.64
   6   9   4    4.77    0.66
  -7  -9  -4    0.11    0.62
  -7  -9  -4    0.37    0.64
  -8  -9  -4    8.99    0.95
  -8  -9  -4    9.64    0.89
  -9  -9  -4    1.45    0.84
  -9  -9  -4   -0.13    0.68
 -10  -9  -4    5.28    1.02
 -11  -9  -4   -0.05    0.95
 -12  -9  -4    5.93    1.20
 -13  -9  -4   -0.14    1.18
 -14  -9  -4   -0.61    1.24
 -13  10   4    2.25    1.34
 -12  10   4    0.15    1.19
 -11  10   4   14.05    1.51
 -10  10   4    0.19    0.98
  -9  10   4    0.84    0.93
  -9  10   4    0.12    0.68
  -8  10   4   -0.05    0.79
  -8  10   4    1.29    0.68
  -7  10   4   -0.31    0.62
  -7  10   4    0.98    0.68
  -6  10   4   13.66    1.12
  -6  10   4   13.36    1.18
  -5  10   4    3.05    0.63
  -5  10   4    2.40    0.62
  -4  10   4   78.48    2.44
  -4  10   4   81.17    2.46
  -3  10   4    8.73    0.72
  -3  10   4    8.72    0.79
  -2  10   4    9.15    0.80
  -2  10   4    9.15    0.73
  -1  10   4   16.06    0.98
  -1  10   4   18.13    1.12
   0  10   4   15.80    0.96
   0  10   4   16.42    1.10
   1  10   4    0.53    0.54
   2  10   4   47.57    1.74
   3  10   4    3.81    0.65
   4  10   4    1.24    0.60
   5  10   4   39.51    1.58
  -7 -10  -4    3.59    0.78
   7  10   4    2.77    0.70
  -8 -10  -4   -0.83    0.75
  -8 -10  -4    0.55    0.72
  -9 -10  -4   11.16    1.12
  -9 -10  -4    9.91    1.00
 -10 -10  -4    2.10    0.96
 -11 -10  -4    7.28    1.19
 -12 -10  -4    5.01    1.22
 -13 -10  -4    3.75    1.30
 -13  11   4   13.59    1.78
 -12  11   4    2.28    1.28
 -11  11   4   12.33    1.49
 -10  11   4    0.07    1.01
  -9  11   4    0.77    0.94
  -9  11   4    1.38    0.80
  -8  11   4   24.21    1.74
  -8  11   4   23.28    1.54
  -7  11   4    8.21    0.92
  -7  11   4    7.57    0.99
  -6  11   4   41.23    1.77
  -6  11   4   38.92    1.72
  -5  11   4    1.74    0.64
  -5  11   4    0.91    0.62
  -4  11   4   34.20    1.51
  -4  11   4   34.60    1.49
  -3  11   4    0.88    0.56
  -3  11   4    0.79    0.52
  -2  11   4    3.90    0.65
  -2  11   4    3.54    0.56
  -1  11   4    6.58    0.65
  -1  11   4    7.03    0.76
   0  11   4    8.39    0.81
   0  11   4    7.95    0.68
   1  11   4    0.09    0.57
   2  11   4   18.57    1.18
   3  11   4    8.31    0.83
   4  11   4    2.39    0.67
   5  11   4    0.48    0.64
  -7 -11  -4   32.04    1.61
   7  11   4   32.24    1.58
  -8 -11  -4    3.85    0.93
  -8 -11  -4    4.07    0.86
  -9 -11  -4    0.53    0.86
  -9 -11  -4    0.85    0.84
 -10 -11  -4    0.13    0.91
 -11 -11  -4    1.64    1.07
 -12 -11  -4   -0.36    1.01
 -13 -11  -4    5.77    1.38
 -12  12   4    4.98    1.37
 -11  12   4    1.69    1.13
 -10  12   4    1.91    0.89
 -10  12   4    3.18    1.09
  -9  12   4    3.64    1.08
  -9  12   4    5.33    0.96
  -8  12   4    4.48    0.93
  -8  12   4    6.93    1.08
  -7  12   4   40.41    1.86
  -7  12   4   37.05    1.95
  -6  12   4    0.12    0.71
  -6  12   4    0.83    0.74
  -5  12   4   42.16    1.76
  -5  12   4   42.05    1.82
  -4  12   4    2.69    0.71
  -4  12   4    2.36    0.65
  -3  12   4   83.87    2.68
  -3  12   4   83.13    2.53
  -2  12   4    3.79    0.61
  -2  12   4    4.00    0.73
  -1  12   4   74.63    2.44
  -1  12   4   74.11    2.26
   0  12   4    4.01    0.71
   0  12   4    3.33    0.49
   1  12   4   21.78    1.29
   2  12   4   18.00    1.24
   3  12   4   19.81    1.32
   4  12   4    9.33    0.94
   5  12   4   29.34    1.55
   7  12   4    4.47    0.93
  -8 -12  -4    4.55    0.92
   8  12   4    5.33    0.93
  -9 -12  -4   18.56    1.52
  -9 -12  -4   17.57    1.60
 -10 -12  -4    0.85    0.94
 -11 -12  -4   15.90    1.45
 -12 -12  -4   12.71    1.48
 -13 -12  -4    1.99    1.28
 -12  13   4   -1.19    1.17
 -11  13   4   -0.15    1.13
 -10  13   4   -0.06    1.08
 -10  13   4    1.12    0.92
  -9  13   4    1.51    1.02
  -9  13   4    1.28    0.88
  -8  13   4    0.62    0.89
  -8  13   4    1.26    0.96
  -7  13   4   10.50    1.17
  -7  13   4    9.91    1.14
  -6  13   4   11.39    1.11
  -6  13   4   10.59    1.13
  -5  13   4   12.57    1.14
  -5  13   4   10.56    1.04
  -4  13   4   30.46    1.54
  -4  13   4   28.99    1.62
  -3  13   4    5.75    0.86
  -3  13   4    5.28    0.74
  -2  13   4    2.86    0.75
  -2  13   4    3.55    0.65
  -1  13   4   21.08    1.05
   0  13   4   12.58    1.18
   1  13   4    2.91    0.74
   2  13   4    4.02    0.81
  -3 -13  -4   36.40    1.54
   3  13   4   32.24    1.64
   4  13   4    1.33    0.78
   5  13   4   94.24    3.03
   6  13   4    1.32    0.85
  -8 -13  -4    1.36    0.84
   8  13   4    1.48    0.86
  -9 -13  -4   28.82    1.79
  -9 -13  -4   31.19    1.86
 -10 -13  -4   -0.96    0.93
 -11 -13  -4    0.48    1.05
 -12 -13  -4   -0.82    1.13
 -12  14   4    1.35    1.32
 -11  14   4    1.21    1.20
 -10  14   4    5.13    1.23
 -10  14   4    1.28    1.00
  -9  14   4    9.59    1.27
  -9  14   4    9.53    1.31
  -8  14   4    1.63    0.96
  -8  14   4   -0.35    0.91
  -7  14   4    9.99    1.22
  -7  14   4   11.89    1.26
  -6  14   4    9.93    1.19
  -6  14   4   10.14    1.11
  -5  14   4   -1.25    0.81
  -5  14   4   -0.63    0.76
  -4  14   4    0.28    0.81
  -4  14   4    0.55    0.70
  -3  14   4    2.04    0.83
  -3  14   4    3.93    0.76
  -2  14   4   23.19    1.51
  -1  14   4    7.73    0.96
   0  14   4   46.60    1.99
   1  14   4    6.75    0.95
   2  14   4   -0.73    0.71
  -3 -14  -4   12.04    0.98
   3  14   4   13.07    1.18
  -4 -14  -4    4.29    0.94
   4  14   4    3.55    0.94
   5  14   4   57.19    2.35
   6  14   4    3.46    0.97
  -8 -14  -4   11.10    1.11
   8  14   4   11.53    1.23
  -9 -14  -4    0.98    0.91
 -10 -14  -4    0.81    0.98
 -11 -14  -4    1.96    1.09
 -12 -14  -4   -0.69    1.13
 -11  15   4    0.65    1.19
 -10  15   4   10.70    1.38
 -10  15   4    8.63    1.30
  -9  15   4    2.47    1.11
  -9  15   4    4.56    1.16
  -8  15   4    1.18    1.00
  -8  15   4   -1.23    0.92
  -7  15   4   -1.47    0.92
  -7  15   4    0.61    0.91
  -6  15   4   44.11    2.09
  -6  15   4   44.70    2.24
  -5  15   4    2.14    0.97
  -5  15   4    0.95    0.85
  -4  15   4   11.70    1.08
  -4  15   4   11.67    1.24
  -3  15   4   59.88    2.43
  -2  15   4    1.44    0.87
  -1  15   4   28.37    1.74
   0  15   4    5.03    0.96
   0  15   4    3.70    0.76
   1  15   4   16.95    1.55
   2  15   4   15.42    1.33
  -3 -15  -4    3.10    0.83
   3  15   4    3.04    1.00
  -4 -15  -4   15.38    1.22
   4  15   4   13.32    1.33
  -5 -15  -4   21.59    1.71
   5  15   4   20.75    1.72
   6  15   4    0.90    0.97
   7  15   4    4.78    1.13
  -8 -15  -4    3.42    0.95
  -9 -15  -4    0.64    0.92
 -10 -15  -4    1.33    1.01
 -11 -15  -4    0.47    1.09
 -10  16   4    1.78    1.22
 -10  16   4    1.92    1.16
  -9  16   4   -0.71    1.06
  -9  16   4   -1.54    1.04
  -8  16   4   -1.18    0.95
  -8  16   4    0.08    1.04
  -7  16   4    0.29    1.03
  -7  16   4    0.33    0.96
  -6  16   4    6.87    1.22
  -6  16   4    7.15    1.13
  -5  16   4    4.62    0.96
  -5  16   4    4.26    1.12
  -4  16   4    3.24    0.87
  -4  16   4    0.49    0.95
  -3  16   4   -0.04    0.90
  -2  16   4   39.09    2.11
  -1  16   4   10.38    0.99
  -1  16   4    9.93    1.20
   0  16   4   -0.59    0.91
   1  16   4    2.21    1.02
   2  16   4    3.40    1.04
  -3 -16  -4    1.48    0.85
   3  16   4    2.32    1.06
  -4 -16  -4   42.86    1.99
   4  16   4   45.34    2.26
  -5 -16  -4    5.61    1.09
   5  16   4    6.06    1.20
  -6 -16  -4   -0.73    1.09
   6  16   4    1.22    1.07
  -7 -16  -4    1.67    1.17
   7  16   4    1.75    1.09
  -8 -16  -4    4.83    0.99
  -9 -16  -4    1.34    0.98
 -10 -16  -4    1.14    1.02
 -10  17   4    2.40    1.30
 -10  17   4    3.58    1.30
  -9  17   4    0.75    1.12
  -9  17   4   -0.87    1.12
  -8  17   4   17.48    1.53
  -8  17   4   13.92    1.59
  -7  17   4    2.08    1.06
  -7  17   4    1.20    1.15
  -6  17   4   -0.22    0.96
  -6  17   4   -0.68    1.06
  -5  17   4   -1.27    0.85
  -5  17   4    0.84    1.08
  -4  17   4    0.27    0.99
  -3  17   4   18.14    1.74
  -2  17   4    1.60    1.02
  -2  17   4    0.76    0.80
  -1  17   4    1.75    0.78
  -1  17   4    0.37    0.94
   0  17   4   -0.74    1.01
   1  17   4    2.95    1.12
   2  17   4    1.69    1.08
  -3 -17  -4    3.74    0.91
   3  17   4    4.60    1.21
  -4 -17  -4   23.61    1.75
   4  17   4   23.63    1.89
  -5 -17  -4    5.20    1.12
   5  17   4    5.93    1.27
  -6 -17  -4    0.38    1.08
   6  17   4   -0.33    1.10
  -7 -17  -4    4.07    1.27
   7  17   4    3.34    1.21
  -8 -17  -4    9.19    1.52
  -9 -17  -4    0.80    1.33
 -10 -17  -4    0.76    1.54
  -9  18   4    5.56    1.44
  -9  18   4    7.62    1.37
  -8  18   4    0.43    1.15
  -8  18   4   -0.18    1.24
  -7  18   4   24.26    2.17
  -7  18   4   25.18    2.08
  -6  18   4    1.22    1.01
  -6  18   4    0.67    1.19
  -5  18   4   -0.04    1.08
  -4  18   4    2.34    1.14
  -3  18   4    0.66    1.10
  -3  18   4    1.80    0.86
  -2  18   4    0.01    1.05
  -2  18   4    0.00    0.78
  -1  18   4    1.20    1.08
  -1  18   4    1.95    0.82
   0  18   4   -0.76    1.07
   1  18   4    8.38    1.35
   2  18   4    0.58    1.15
   3  18   4    1.51    1.18
  -4 -18  -4    0.20    0.99
   4  18   4    1.79    1.21
  -5 -18  -4    2.79    1.12
   5  18   4    0.50    1.20
  -6 -18  -4    0.34    1.12
   6  18   4   -1.18    1.17
  -7 -18  -4   -0.48    1.20
   7  18   4   -0.85    1.17
  -8 -18  -4    6.90    1.49
  -9 -18  -4    1.31    1.41
  -8  19   4    9.92    1.47
  -8  19   4    4.69    1.47
  -7  19   4    2.68    1.17
  -7  19   4    2.13    1.33
  -6  19   4    2.93    1.35
  -5  19   4    3.46    1.30
  -4  19   4   -0.46    1.14
  -3  19   4    7.50    1.06
  -3  19   4    7.03    1.39
  -2  19   4    3.34    1.24
  -2  19   4    2.78    0.90
  -1  19   4    1.53    1.22
   0  19   4   -0.88    1.11
   1  19   4    0.09    1.19
   2  19   4    1.25    1.25
   3  19   4   30.09    2.28
   4  19   4    0.29    1.21
  -5 -19  -4    2.36    1.23
   5  19   4    2.42    1.28
  -6 -19  -4    5.41    1.32
   6  19   4    6.91    1.48
  -7 -19  -4    2.25    1.32
   7  19   4    0.01    1.31
  -8 -19  -4   15.37    1.76
   8  19   4   14.97    1.70
  -7  20   4   -2.13    1.33
  -7  20   4   -0.10    1.18
  -6  20   4   -2.53    1.26
  -5  20   4   -0.05    1.29
  -4  20   4   -1.19    1.22
  -3  20   4   -1.92    1.17
  -2  20   4   -0.70    1.23
  -1  20   4   -0.75    1.20
   0  20   4    0.29    1.22
   1  20   4    1.75    1.34
   2  20   4   -1.16    1.26
   3  20   4    2.20    1.39
   4  20   4   -0.97    1.30
   5  20   4    2.37    1.37
   6  20   4   14.20    1.75
   7  20   4   -1.28    1.37
  -5  21   4   -0.38    1.40
  -4  21   4   -1.76    1.34
  -3  21   4    0.51    1.35
  -2  21   4    1.09    1.39
  -1  21   4    0.92    1.35
   0  21   4    0.52    1.36
   1  21   4    3.54    1.45
   2  21   4    7.61    1.59
   3  21   4   -0.25    1.41
   4  21   4    0.21    1.44
   5  21   4   -1.48    1.35
  -3  22   4   -1.12    1.41
  -2  22   4    0.40    1.45
  -1  22   4    2.96    1.49
   0  22   4    1.04    1.46
   1  22   4    0.10    1.49
   2  22   4   15.81    1.94
   3  22   4   -0.35    1.48
   4  18  -5    0.04    1.44
   3  18  -5    1.82    1.44
  -3 -18   5    0.35    1.34
   2  18  -5   -0.42    1.34
  -2 -18   5   -0.86    1.27
   1  18  -5   -1.16    1.32
  -1 -18   5   -0.64    1.23
   0  18  -5   -2.44    1.32
  -1  18  -5    0.87    1.44
  -2  18  -5    2.78    1.49
  -3  18  -5    2.53    1.46
  -4  18  -5   -2.49    1.39
   6  17  -5   -1.16    1.42
   5  17  -5   -0.78    1.37
  -5 -17   5    0.53    1.41
   4  17  -5    0.56    1.32
  -4 -17   5    2.09    1.36
   3  17  -5   -1.89    1.28
  -3 -17   5    0.17    1.24
   2  17  -5    4.98    1.45
  -2 -17   5    2.88    1.28
   1  17  -5    3.01    1.36
  -1 -17   5    1.98    1.19
   0  17  -5    5.29    1.43
   0 -17   5    3.28    1.20
  -1  17  -5    0.61    1.30
   1 -17   5    0.81    1.15
  -2  17  -5   -1.40    1.27
  -3  17  -5    0.34    1.31
  -4  17  -5    0.47    1.36
  -5  17  -5    0.77    1.37
  -6  17  -5   -2.70    1.32
  -7 -16   5    7.47    1.57
   6  16  -5    0.72    1.36
  -6 -16   5    1.45    1.40
   5  16  -5    4.69    1.42
  -5 -16   5    7.56    1.47
   4  16  -5   -1.27    1.23
  -4 -16   5    1.04    1.23
   3  16  -5    0.58    1.23
  -3 -16   5   -0.60    1.17
   2  16  -5   -0.70    1.23
  -2 -16   5   -1.49    1.07
   1  16  -5   -1.60    1.14
  -1 -16   5   -0.68    1.04
   0  16  -5    0.02    1.23
   0 -16   5    2.64    1.13
  -1  16  -5    3.11    1.30
   1 -16   5    2.61    1.11
  -2  16  -5   -0.60    1.23
   2 -16   5   -0.72    1.04
  -3  16  -5    8.93    1.53
  -4  16  -5   -0.48    1.21
  -5  16  -5    2.73    1.38
  -6  16  -5   -1.27    1.30
  -7  16  -5   -2.15    1.34
  -8 -15   5    3.55    1.52
  -7 -15   5   -1.47    1.31
   6  15  -5    1.25    1.24
  -6 -15   5    2.27    1.27
   5  15  -5   -0.92    1.15
  -5 -15   5   -0.35    1.22
   4  15  -5    0.18    1.19
  -4 -15   5    1.00    1.18
   3  15  -5    3.13    1.24
  -3 -15   5    2.65    1.15
   2  15  -5    3.37    1.28
  -2 -15   5    3.52    1.15
   1  15  -5   11.29    1.49
  -1 -15   5   12.58    1.33
   0  15  -5    2.95    1.22
   0 -15   5    0.36    1.05
  -1  15  -5   -1.05    1.10
   1 -15   5   -0.10    0.99
  -2  15  -5   21.63    2.08
   2 -15   5   20.53    1.72
  -3  15  -5   10.37    1.48
  -4  15  -5    3.70    1.25
  -5  15  -5    6.09    1.40
  -6  15  -5    4.38    1.37
  -7  15  -5    0.81    1.33
  -8  15  -5   -2.40    1.27
  -9 -14   5    0.48    1.41
  -8 -14   5    0.13    1.35
  -7 -14   5   -0.10    1.24
   6  14  -5   -0.26    1.15
  -6 -14   5    0.06    1.18
   5  14  -5    0.15    1.12
  -5 -14   5   -0.93    1.08
   4  14  -5    2.68    1.17
  -4 -14   5    1.69    1.12
   3  14  -5    1.55    1.15
  -3 -14   5    0.13    1.05
   2  14  -5   -0.41    1.10
  -2 -14   5    0.58    0.97
   1  14  -5   11.43    1.42
  -1 -14   5   10.43    1.23
   0  14  -5    0.63    1.11
   0 -14   5    0.04    0.96
  -1  14  -5    0.86    1.11
   1 -14   5    1.19    1.00
  -2  14  -5    1.15    1.14
   2 -14   5    0.21    0.98
  -3  14  -5   -0.26    1.11
  -4  14  -5   13.25    1.51
  -5  14  -5   -1.01    1.11
  -6  14  -5   -2.09    1.12
  -7  14  -5    1.33    1.28
  -8  14  -5   -0.90    1.24
  -9  14  -5    3.20    1.42
 -10 -13   5   -1.08    1.43
  -9 -13   5    6.34    1.53
  -8 -13   5    0.95    1.25
   7  13  -5   -0.75    1.07
  -7 -13   5   -0.12    1.15
  -6 -13   5   -0.80    1.09
   5  13  -5   -0.24    1.04
  -5 -13   5    0.67    1.08
   4  13  -5   -0.01    1.03
  -4 -13   5   -0.65    1.00
   3  13  -5   26.84    1.94
  -3 -13   5   30.34    1.88
   2  13  -5    4.69    1.13
  -2 -13   5    4.55    1.07
   1  13  -5    1.13    1.03
  -1 -13   5   -1.16    0.91
   0  13  -5   28.12    1.92
   0 -13   5   29.47    1.75
  -1  13  -5    3.67    1.11
   1 -13   5    3.66    1.01
  -2  13  -5    7.00    1.21
   2 -13   5    8.39    1.10
  -3  13  -5   13.08    1.42
  -4  13  -5   13.13    1.42
  -5  13  -5    1.96    1.18
  -6  13  -5   25.98    2.08
  -7  13  -5    2.23    1.22
  -8  13  -5    1.62    1.24
  -9  13  -5   -1.89    1.19
 -10  13  -5    0.57    1.33
 -10 -12   5    6.23    1.51
  -9 -12   5    1.78    1.31
  -8 -12   5    1.01    1.20
   7  12  -5   -1.01    0.91
  -7 -12   5   -1.12    1.09
  -6 -12   5    0.21    1.06
   5  12  -5   -0.17    0.95
  -5 -12   5    0.86    1.03
   4  12  -5    0.20    0.92
  -4 -12   5    0.86    0.94
  -3 -12   5   12.19    1.21
   2  12  -5    2.59    1.01
  -2 -12   5    2.32    0.93
   1  12  -5    9.23    1.22
  -1 -12   5   11.79    1.14
   0  12  -5    2.95    1.01
   0 -12   5    3.12    0.90
  -1  12  -5   58.93    2.54
   1 -12   5   63.76    2.29
  -2  12  -5   25.21    1.81
   2 -12   5   23.42    1.64
  -3  12  -5    0.87    0.93
  -4  12  -5   10.47    1.30
  -5  12  -5    5.61    1.17
  -6  12  -5    2.71    1.14
  -7  12  -5   11.21    1.11
  -7  12  -5   10.72    1.38
  -8  12  -5    2.84    1.22
  -8  12  -5    5.76    1.07
  -9  12  -5    1.08    1.16
 -10  12  -5    9.77    1.51
 -11  12  -5    0.18    1.16
 -11  12  -5   -0.73    1.26
 -11 -11   5    1.20    1.39
 -10 -11   5    0.79    1.28
  -9 -11   5    0.25    1.18
  -8 -11   5   -0.68    1.08
   7  11  -5   -0.19    0.87
  -7 -11   5    0.79    1.04
   6  11  -5   17.01    1.58
  -6 -11   5   18.79    1.71
  -5 -11   5    6.63    1.11
   4  11  -5   22.33    1.66
  -4 -11   5   20.67    1.63
   3  11  -5    1.22    0.89
  -3 -11   5    2.06    0.88
   2  11  -5   -0.04    0.86
  -2 -11   5    0.77    0.84
   1  11  -5   -0.29    0.84
  -1 -11   5   -0.20    0.73
   0  11  -5    3.24    0.90
   0 -11   5    3.40    0.83
  -1  11  -5    0.59    0.82
   1 -11   5   -0.31    0.74
  -2  11  -5   23.28    1.62
   2 -11   5   18.59    1.45
  -3  11  -5    7.00    1.06
  -4  11  -5   -0.39    0.87
  -4  11  -5   -0.06    0.61
  -5  11  -5    4.88    0.75
  -5  11  -5    5.37    1.09
  -6  11  -5    9.79    1.28
  -6  11  -5   11.45    1.03
  -7  11  -5    1.61    1.09
  -7  11  -5    2.02    0.86
  -8  11  -5    3.36    0.97
  -8  11  -5    0.42    1.08
  -9  11  -5   -0.18    1.10
 -10  11  -5    0.75    1.08
 -10  11  -5    0.64    1.14
 -11  11  -5    5.85    1.32
 -11  11  -5    5.68    1.37
 -12 -10   5    3.68    1.49
 -11 -10   5    6.53    1.49
 -10 -10   5    9.43    1.43
  -9 -10   5    3.67    1.23
  -8 -10   5   -0.88    0.99
   7  10  -5    2.09    0.88
  -7 -10   5    1.98    1.03
   6  10  -5    2.57    0.89
  -6 -10   5    0.28    0.95
  -5 -10   5   33.40    1.83
   4  10  -5    2.40    0.84
  -4 -10   5    2.09    0.89
   3  10  -5   28.34    1.59
  -3 -10   5   25.22    1.50
   2  10  -5    1.08    0.76
  -2 -10   5   -0.46    0.68
   1  10  -5   20.78    1.46
  -1 -10   5   17.91    1.29
   0  10  -5    2.79    0.79
   0 -10   5    3.16    0.74
  -1  10  -5    3.28    0.79
   1 -10   5    3.21    0.73
  -2  10  -5    2.74    0.76
   2 -10   5    4.31    0.80
  -3  10  -5    1.64    0.79
  -3  10  -5    1.89    0.49
  -4  10  -5    1.21    0.55
  -4  10  -5    1.56    0.83
  -5  10  -5   13.93    1.29
  -5  10  -5   20.42    1.23
  -6  10  -5    3.65    1.03
  -6  10  -5    4.35    0.81
  -7  10  -5   -0.20    0.94
  -7  10  -5    0.78    0.84
  -8  10  -5    2.25    1.06
  -9  10  -5    0.59    1.08
  -9  10  -5    1.43    1.03
 -10  10  -5    5.28    1.22
 -10  10  -5    3.96    1.22
 -11  10  -5   10.53    1.39
 -11  10  -5   13.79    1.50
 -12  10  -5    0.80    1.29
 -12  -9   5   -0.73    1.21
 -11  -9   5    1.79    1.23
 -10  -9   5    3.48    1.18
  -9  -9   5    0.40    1.06
  -8  -9   5   11.26    1.31
   7   9  -5    0.77    0.79
  -7  -9   5   -0.14    0.90
   6   9  -5    1.07    0.79
  -6  -9   5    1.30    0.91
  -5  -9   5   -0.79    0.76
   4   9  -5    7.53    0.91
  -4  -9   5    7.22    0.92
   3   9  -5    3.31    0.77
  -3  -9   5    3.12    0.74
   2   9  -5   30.46    1.52
  -2  -9   5   31.77    1.48
   1   9  -5   48.38    1.91
  -1  -9   5   48.06    1.78
   0   9  -5    0.16    0.63
   0  -9   5   -0.20    0.60
  -1   9  -5   15.99    1.24
   1  -9   5   17.80    1.17
  -2   9  -5    0.30    0.34
  -2   9  -5    1.53    0.67
   2  -9   5    0.48    0.65
  -3   9  -5   -0.55    0.66
  -3   9  -5    0.29    0.43
  -4   9  -5    6.83    0.67
  -4   9  -5    6.01    0.92
  -5   9  -5   12.94    1.20
  -5   9  -5   14.01    1.14
  -6   9  -5    5.58    1.01
  -6   9  -5    4.48    0.84
  -7   9  -5   -0.22    0.89
  -8   9  -5    1.37    0.96
  -9   9  -5   -1.13    0.89
  -9   9  -5    1.15    0.98
 -10   9  -5    1.37    1.05
 -10   9  -5   -0.92    0.98
 -11   9  -5   10.23    1.38
 -11   9  -5    8.43    1.26
 -12   9  -5    0.43    1.19
 -12  -8   5   -0.40    1.23
 -11  -8   5    3.59    1.26
 -11  -8   5    4.04    1.13
 -10  -8   5    1.82    1.12
 -10  -8   5    1.79    0.91
  -9  -8   5   20.95    1.48
  -8  -8   5    2.13    1.00
  -8  -8   5    1.84    0.73
   7   8  -5   16.24    1.23
  -7  -8   5   13.58    1.29
  -7  -8   5   16.37    1.13
   6   8  -5   56.53    2.00
  -6  -8   5   52.83    1.72
  -6  -8   5   51.12    2.14
   5   8  -5   15.67    1.15
  -5  -8   5   14.44    0.81
  -5  -8   5   15.32    1.30
  -4  -8   5    1.46    0.68
   3   8  -5    4.78    0.74
  -3  -8   5    4.50    0.74
   2   8  -5    8.39    0.83
  -2  -8   5    8.60    0.81
   1   8  -5   24.65    1.34
  -1  -8   5   24.75    1.26
   0   8  -5    1.42    0.61
   0  -8   5    2.14    0.62
  -1   8  -5   24.06    1.34
   1  -8   5   24.64    1.24
  -2   8  -5   17.33    1.24
  -2   8  -5   19.54    0.80
   2  -8   5   18.85    1.16
  -3   8  -5   22.89    1.33
  -3   8  -5   21.30    0.96
  -4   8  -5   17.05    1.28
  -4   8  -5   16.92    1.02
  -5   8  -5    0.90    0.73
  -5   8  -5   -1.35    0.56
  -6   8  -5   -1.29    0.63
  -6   8  -5    0.40    0.80
  -7   8  -5   12.59    1.20
  -8   8  -5    9.58    1.10
  -8   8  -5    9.54    1.17
  -9   8  -5    2.45    0.99
  -9   8  -5   -0.21    0.89
 -10   8  -5    1.77    1.06
 -10   8  -5    2.42    1.03
 -11   8  -5   30.23    1.99
 -11   8  -5   36.67    2.16
 -12   8  -5    0.52    1.18
 -13   8  -5    5.16    1.46
 -13  -7   5    0.86    1.31
 -13  -7   5    2.62    1.31
 -12  -7   5   20.93    1.92
 -12  -7   5   17.27    1.72
 -11  -7   5    0.82    1.15
 -11  -7   5    0.46    0.99
 -10  -7   5    1.44    1.10
 -10  -7   5    0.02    0.89
  -9  -7   5    7.42    1.17
  -9  -7   5    5.32    0.91
  -8  -7   5   33.26    1.60
  -8  -7   5   29.50    1.84
   7   7  -5   13.02    1.08
  -7  -7   5   12.17    1.19
  -7  -7   5   12.75    1.05
   6   7  -5   10.06    0.84
  -6  -7   5    7.77    0.97
  -6  -7   5   10.26    0.86
   5   7  -5   18.01    1.11
  -5  -7   5   17.84    0.86
  -5  -7   5   16.64    1.27
  -4  -7   5   39.86    1.63
   3   7  -5   21.40    1.16
  -3  -7   5   19.63    1.18
   2   7  -5    8.63    0.79
  -2  -7   5    7.15    0.75
   1   7  -5   12.82    1.04
  -1  -7   5   14.08    1.01
   0   7  -5  196.95    5.14
   0  -7   5  195.48    4.84
  -1   7  -5    1.80    0.61
   1  -7   5    1.83    0.59
  -2   7  -5   47.36    1.82
  -2   7  -5   48.34    1.40
   2  -7   5   47.92    1.66
  -3   7  -5   32.75    1.53
  -3   7  -5   32.60    1.18
  -4   7  -5    0.76    0.65
  -4   7  -5    0.85    0.45
  -5   7  -5   10.66    0.97
  -5   7  -5   13.46    1.02
  -6   7  -5    4.48    0.84
  -7   7  -5   20.08    1.46
  -7   7  -5   20.71    1.45
  -8   7  -5    5.10    0.99
  -8   7  -5    5.14    0.99
  -9   7  -5   -0.11    0.89
  -9   7  -5    0.15    0.96
 -10   7  -5    1.40    0.92
 -10   7  -5    0.76    1.03
 -11   7  -5   10.88    1.43
 -11   7  -5   12.53    1.28
 -12   7  -5    0.32    1.22
 -13   7  -5   -1.83    1.26
 -13  -6   5    6.59    1.39
 -13  -6   5    8.97    1.60
 -12  -6   5    1.18    1.12
 -12  -6   5    0.52    1.22
 -11  -6   5   10.00    1.28
 -11  -6   5    9.72    1.41
 -10  -6   5    1.21    1.09
 -10  -6   5    0.69    0.91
  -9  -6   5    8.92    1.03
  -9  -6   5    8.50    1.21
  -8  -6   5   46.26    2.11
  -8  -6   5   48.34    1.88
   7   6  -5   14.59    1.01
  -7  -6   5   15.53    1.38
  -7  -6   5   16.16    1.08
   6   6  -5   -0.57    0.49
  -6  -6   5   -0.02    0.68
  -6  -6   5   -0.13    0.45
   5   6  -5   26.77    1.19
  -5  -6   5   26.79    1.40
  -5  -6   5   26.46    1.04
   4   6  -5    6.93    0.68
  -4  -6   5    7.53    0.58
  -4  -6   5    7.03    0.77
   3   6  -5   89.01    2.58
  -3  -6   5   88.36    2.55
   2   6  -5   50.04    1.71
  -2  -6   5   46.59    1.63
   1   6  -5    0.57    0.54
  -1  -6   5   -0.29    0.50
   0   6  -5   24.17    1.26
   0  -6   5   25.14    1.19
  -1   6  -5   67.48    2.17
   1  -6   5   67.48    2.02
  -2   6  -5    4.77    0.69
  -2   6  -5    4.30    0.41
   2  -6   5    3.46    0.63
  -3   6  -5   33.23    1.47
  -3   6  -5   36.14    1.22
  -4   6  -5    4.25    0.70
  -4   6  -5    4.58    0.56
  -5   6  -5    6.59    0.68
  -5   6  -5    6.76    0.80
  -6   6  -5   -0.18    0.62
  -6   6  -5    0.53    0.43
  -7   6  -5    9.68    0.95
  -7   6  -5   10.38    0.99
  -8   6  -5    3.79    0.91
  -8   6  -5    4.15    0.91
  -9   6  -5    4.06    1.03
  -9   6  -5    5.72    0.98
 -10   6  -5    2.17    1.05
 -10   6  -5    2.05    0.94
 -11   6  -5    0.47    0.89
 -11   6  -5   -0.51    1.11
 -12   6  -5    2.37    1.30
 -13   6  -5    6.30    1.49
 -14  -5   5    5.37    1.46
 -13  -5   5    5.91    1.35
 -12  -5   5   12.38    1.43
 -11  -5   5   40.96    2.18
 -10  -5   5    0.77    0.92
 -10  -5   5    0.17    1.06
  -9  -5   5    7.64    1.17
  -9  -5   5    7.07    0.98
  -8  -5   5    1.08    0.67
  -8  -5   5   -0.40    0.86
   7   5  -5   -0.06    0.44
  -7  -5   5    0.54    0.56
  -7  -5   5   -0.34    0.71
   6   5  -5   -0.65    0.41
  -6  -5   5    0.26    0.64
  -6  -5   5    0.04    0.45
   5   5  -5    0.24    0.44
  -5  -5   5    0.36    0.39
  -5  -5   5    1.20    0.62
   4   5  -5   -0.19    0.42
  -4  -5   5    0.14    0.54
  -4  -5   5   -0.49    0.33
  -3  -5   5   97.92    2.72
   2   5  -5   -0.14    0.48
  -2  -5   5   -0.28    0.50
   1   5  -5    8.22    0.72
  -1  -5   5    8.86    0.73
   0   5  -5    0.26    0.49
   0  -5   5   -0.46    0.49
  -1   5  -5    0.30    0.51
   1  -5   5    0.87    0.52
  -2   5  -5    3.92    0.40
  -2   5  -5    4.96    0.69
   2  -5   5    3.97    0.61
  -3   5  -5   19.20    0.88
  -3   5  -5   15.32    1.11
  -4   5  -5   89.22    2.56
  -4   5  -5   95.54    2.77
  -5   5  -5    8.67    0.73
  -6   5  -5    6.52    0.74
  -6   5  -5    5.80    0.77
  -7   5  -5   -1.40    0.61
  -7   5  -5    0.33    0.63
  -8   5  -5    0.88    0.76
  -8   5  -5    1.36    0.70
  -9   5  -5   23.59    1.68
  -9   5  -5   22.61    1.52
 -10   5  -5   -2.12    0.80
 -10   5  -5   -2.30    0.96
 -11   5  -5   -1.28    0.85
 -11   5  -5   -0.10    1.07
 -12   5  -5    6.91    1.37
 -13   5  -5   -1.29    1.24
 -14   5  -5   -0.06    1.43
 -14  -4   5   11.89    1.64
 -13  -4   5   43.67    2.47
 -12  -4   5   47.13    2.43
 -11  -4   5   -0.30    0.97
 -10  -4   5    1.93    0.93
  -9  -4   5    8.07    1.00
  -8  -4   5   15.82    1.27
  -8  -4   5   15.00    1.20
  -7  -4   5    2.79    0.63
  -7  -4   5    4.98    0.87
   6   4  -5    4.24    0.49
  -6  -4   5    4.48    0.59
  -6  -4   5    3.94    0.73
   5   4  -5    1.77    0.43
  -5  -4   5    1.48    0.42
  -5  -4   5    0.89    0.60
   4   4  -5   69.10    2.04
  -4  -4   5   74.65    1.97
  -4  -4   5   69.57    2.16
  -3  -4   5  111.82    2.82
  -3  -4   5  114.30    3.01
   2   4  -5    1.04    0.45
  -2  -4   5    1.00    0.48
   1   4  -5    5.20    0.58
  -1  -4   5    4.41    0.56
   0   4  -5   50.90    1.64
   0  -4   5   50.32    1.56
  -1   4  -5    3.69    0.54
   1  -4   5    3.25    0.51
  -2   4  -5    5.90    0.53
  -2   4  -5    5.46    0.63
   2  -4   5    5.81    0.60
  -3   4  -5    2.83    0.57
  -4   4  -5   -0.60    0.46
  -4   4  -5    0.09    0.52
  -5   4  -5    0.21    0.52
  -6   4  -5    0.03    0.54
  -6   4  -5    0.57    0.56
  -7   4  -5    0.81    0.61
  -7   4  -5    0.68    0.63
  -8   4  -5    0.60    0.64
  -8   4  -5    0.37    0.75
  -9   4  -5    3.97    0.97
  -9   4  -5    4.52    0.82
 -10   4  -5    1.21    0.80
 -10   4  -5    0.87    0.98
 -11   4  -5   -0.62    0.86
 -11   4  -5   -0.43    1.03
 -12   4  -5    3.97    1.27
 -13   4  -5   14.80    1.67
 -14   4  -5    8.44    1.62
 -14  -3   5   16.19    1.70
 -13  -3   5   12.02    1.51
 -12  -3   5   -0.76    1.07
 -11  -3   5   24.34    1.85
 -10  -3   5    8.10    1.10
  -9  -3   5   11.64    1.11
  -8  -3   5    1.82    0.68
  -7  -3   5    1.26    0.72
  -7  -3   5    0.36    0.53
   6   3  -5   50.73    1.48
  -6  -3   5   53.04    1.72
  -6  -3   5   51.03    1.87
   5   3  -5    1.30    0.38
  -5  -3   5    1.11    0.58
  -5  -3   5    1.02    0.46
   4   3  -5   33.95    1.19
  -4  -3   5   35.68    1.19
  -4  -3   5   36.37    1.42
   3   3  -5   83.94    2.25
  -3  -3   5   82.23    2.29
  -3  -3   5   80.14    2.12
  -2  -3   5   33.21    1.20
   1   3  -5   17.70    0.84
  -1  -3   5   17.86    0.85
   0   3  -5   41.27    1.34
   0  -3   5   39.57    1.30
  -1   3  -5    0.30    0.19
  -1   3  -5   -0.16    0.36
   1  -3   5    0.46    0.37
  -2   3  -5   48.80    1.35
  -2   3  -5   47.45    1.55
  -3   3  -5    7.99    0.65
  -3   3  -5    9.22    0.80
  -4   3  -5   81.50    2.39
  -5   3  -5    5.06    0.64
  -6   3  -5   15.18    1.00
  -6   3  -5   15.60    1.05
  -7   3  -5   -0.80    0.56
  -7   3  -5    0.78    0.55
  -8   3  -5   24.66    1.52
  -8   3  -5   24.10    1.30
  -9   3  -5   -0.44    0.79
  -9   3  -5   -0.56    0.63
 -10   3  -5    3.87    1.04
 -10   3  -5    2.97    0.81
 -11   3  -5   73.83    2.90
 -12   3  -5   28.54    2.12
 -13   3  -5    3.01    1.30
 -14   3  -5   -0.42    1.32
 -14  -2   5    6.06    1.39
 -13  -2   5    0.07    1.13
 -12  -2   5    4.82    1.16
 -11  -2   5   89.68    3.17
 -10  -2   5    3.54    1.01
  -9  -2   5    0.51    0.76
  -8  -2   5   35.13    1.61
  -7  -2   5    0.70    0.55
  -6  -2   5   12.98    0.91
  -6  -2   5   11.56    0.92
   5   2  -5    7.12    0.57
  -5  -2   5    7.20    0.75
  -5  -2   5    6.56    0.60
   4   2  -5   61.84    1.81
  -4  -2   5   73.85    1.89
  -4  -2   5   62.47    1.99
   3   2  -5   36.62    1.16
  -3  -2   5   37.36    1.12
  -3  -2   5   35.93    1.27
  -2  -2   5   -0.03    0.20
  -2  -2   5   -0.46    0.34
   1   2  -5  116.80    2.99
  -1  -2   5  114.77    2.89
   0   2  -5  143.80    3.59
   0  -2   5  138.74    3.44
  -1   2  -5   11.10    0.68
  -1   2  -5   11.60    0.49
   1  -2   5   11.02    0.71
  -2   2  -5   58.98    1.59
  -2   2  -5   58.66    1.75
  -3   2  -5   24.70    1.03
  -4   2  -5   86.43    2.40
  -4   2  -5   86.94    2.45
  -5   2  -5   15.20    0.98
  -5   2  -5   14.41    0.94
  -6   2  -5   12.88    0.93
  -6   2  -5   13.67    1.03
  -7   2  -5    7.85    0.79
  -7   2  -5    7.11    0.72
  -8   2  -5    3.38    0.62
  -8   2  -5    1.57    0.73
  -9   2  -5    8.53    0.84
  -9   2  -5   10.87    1.07
 -10   2  -5    7.07    1.12
 -10   2  -5    6.28    0.87
 -11   2  -5   -1.26    0.97
 -12   2  -5   -0.04    1.08
 -13   2  -5    3.61    1.32
 -14   2  -5   -3.03    1.23
 -14  -1   5   10.76    1.55
 -13  -1   5    1.31    1.16
 -12  -1   5    2.44    1.09
 -11  -1   5    0.31    0.96
 -10  -1   5   18.45    1.57
  -9  -1   5    0.82    0.79
  -8  -1   5   -0.52    0.60
  -7  -1   5    0.58    0.54
  -6  -1   5   28.85    1.25
  -5  -1   5   28.82    1.33
  -5  -1   5   30.59    1.20
   4   1  -5  103.87    2.63
  -4  -1   5  107.30    2.77
  -4  -1   5  101.62    2.73
   3   1  -5   34.23    1.05
  -3  -1   5   34.58    1.07
  -3  -1   5   34.13    1.19
  -2  -1   5   27.52    0.98
  -2  -1   5   26.06    0.82
   1   1  -5   21.44    0.82
  -1  -1   5   19.29    0.85
  -1  -1   5   19.59    0.64
   0   1  -5   14.65    0.74
   0  -1   5   15.17    0.76
  -1   1  -5    0.35    0.34
   1  -1   5    0.93    0.37
  -2   1  -5  163.68    4.08
  -2   1  -5  168.46    4.18
  -3   1  -5   62.41    1.82
  -4   1  -5  120.69    3.26
  -4   1  -5  129.58    3.30
  -5   1  -5    0.86    0.48
  -5   1  -5    1.21    0.48
  -6   1  -5   15.84    0.92
  -6   1  -5   17.48    1.06
  -7   1  -5   10.51    0.87
  -7   1  -5    9.42    0.84
  -8   1  -5    5.76    0.65
  -8   1  -5    4.95    0.78
  -9   1  -5    4.81    0.69
  -9   1  -5    4.29    0.86
 -10   1  -5   17.38    1.62
 -10   1  -5   16.70    1.17
 -11   1  -5   -0.21    0.98
 -12   1  -5    1.55    1.12
 -13   1  -5   12.42    1.57
 -14   1  -5    4.16    1.45
 -14   0   5   -0.39    1.19
 -13   0   5   27.38    2.09
 -12   0   5    0.13    1.02
 -11   0   5   10.45    1.24
 -10   0   5    4.03    0.97
  -9   0   5    7.50    0.92
  -8   0   5   16.03    1.23
  -7   0   5    0.36    0.52
  -6   0   5    4.00    0.59
  -5   0   5  115.67    3.11
   4   0  -5    2.49    0.29
  -4   0   5    2.39    0.40
  -4   0   5    2.37    0.50
   3   0  -5   29.48    0.91
  -3   0   5   27.99    1.04
  -3   0   5   29.11    0.97
   2   0  -5   38.27    1.15
  -2   0   5   37.00    1.17
  -2   0   5   37.64    1.11
   1   0  -5    6.45    0.49
  -1   0   5    6.26    0.52
   0   0  -5    8.61    0.67
   0   0   5    9.10    0.69
  -1   0  -5    0.42    0.38
   1   0   5    0.81    0.39
  -2   0  -5  150.62    3.79
  -3   0  -5   73.32    2.04
  -3   0  -5   73.15    2.00
  -4   0  -5    3.48    0.45
  -4   0  -5    3.88    0.47
  -5   0  -5    2.63    0.49
  -5   0  -5    2.76    0.52
  -6   0  -5    4.70    0.65
  -6   0  -5    6.03    0.58
  -7   0  -5   11.80    1.02
  -7   0  -5   12.06    0.86
  -8   0  -5   -0.01    0.43
  -8   0  -5   -0.48    0.58
  -9   0  -5    1.30    0.55
  -9   0  -5    1.82    0.75
 -10   0  -5    0.61    0.82
 -10   0  -5    0.17    0.60
 -11   0  -5    0.05    0.96
 -12   0  -5    5.41    1.20
 -13   0  -5    5.61    1.34
 -14   0  -5    1.26    1.29
 -15   0  -5    3.50    1.50
 -14   1   5   -2.00    1.17
 -13   1   5    4.13    1.24
 -12   1   5    9.40    1.29
 -11   1   5    7.40    1.13
 -10   1   5    0.74    0.83
  -9   1   5    0.70    0.67
  -8   1   5    3.80    0.69
  -7   1   5   27.81    1.33
  -6   1   5   38.08    1.47
  -5   1   5   46.36    1.56
   4  -1  -5   31.84    0.96
  -4   1   5   32.02    1.15
  -4   1   5   34.01    1.18
   3  -1  -5   34.57    1.04
  -3   1   5   35.11    1.13
  -3   1   5   35.01    1.13
   2  -1  -5  282.01    6.58
  -2   1   5  261.77    6.61
  -2   1   5  280.76    6.33
   1  -1  -5   74.43    2.03
  -1   1   5   76.18    1.96
   0  -1  -5    1.13    0.45
   0   1   5    1.83    0.35
   0   1   5    2.25    0.44
  -1  -1  -5  674.35   15.88
  -2  -1  -5  510.66   12.10
  -3  -1  -5   14.95    0.75
  -4  -1  -5    0.18    0.33
  -4  -1  -5    0.50    0.36
  -5  -1  -5    2.40    0.51
  -5  -1  -5    2.68    0.48
  -6  -1  -5   10.96    0.93
  -6  -1  -5   10.37    0.80
  -7  -1  -5    0.25    0.41
  -7  -1  -5    0.40    0.52
  -8  -1  -5   14.25    1.15
  -8  -1  -5   14.04    0.89
  -9  -1  -5   29.15    1.24
  -9  -1  -5   28.05    1.60
 -10  -1  -5    0.63    0.81
 -10  -1  -5   -0.16    0.56
 -11  -1  -5    1.16    0.94
 -12  -1  -5    0.91    1.03
 -13  -1  -5    1.53    1.19
 -14  -1  -5   -0.39    1.24
 -15  -1  -5    0.34    1.39
 -14   2   5    1.88    1.30
 -13   2   5    1.71    1.16
 -12   2   5    1.88    1.07
 -11   2   5    1.87    0.96
 -10   2   5    0.10    0.80
  -9   2   5   27.62    1.54
  -8   2   5   18.96    1.23
  -7   2   5   18.19    1.12
  -6   2   5    0.76    0.51
  -5   2   5   80.83    2.35
   4  -2  -5   12.23    0.59
  -4   2   5   11.61    0.75
  -4   2   5   12.61    0.76
   3  -2  -5   90.90    2.30
  -3   2   5   88.41    2.39
  -2   2   5   45.70    1.35
   1  -2  -5  284.39    6.88
  -1   2   5  288.40    6.89
   0  -2  -5  777.26   18.32
   0   2   5  783.47   18.39
  -1  -2  -5   92.37    2.48
  -2  -2  -5  149.30    3.76
  -3  -2  -5   23.55    0.94
  -4  -2  -5   14.47    0.76
  -5  -2  -5    0.42    0.45
  -5  -2  -5   -0.56    0.38
  -6  -2  -5   19.13    0.92
  -6  -2  -5   17.27    1.07
  -7  -2  -5    7.46    0.61
  -7  -2  -5    7.55    0.74
  -8  -2  -5    0.19    0.42
  -8  -2  -5    0.91    0.60
  -9  -2  -5   22.44    1.08
  -9  -2  -5   22.20    1.42
 -10  -2  -5   27.46    1.72
 -11  -2  -5    2.92    0.98
 -12  -2  -5   11.64    1.35
 -13  -2  -5   32.31    2.23
 -14  -2  -5    0.48    1.26
 -15  -2  -5    1.52    1.38
 -14   3   5    6.03    1.41
 -13   3   5    0.23    1.12
 -12   3   5   25.74    1.99
 -11   3   5   -0.31    0.90
 -10   3   5    9.61    1.09
  -9   3   5   17.35    1.36
  -8   3   5    0.27    0.59
  -7   3   5   21.75    1.23
  -6   3   5   53.77    1.83
   5  -3  -5   -0.13    0.33
  -5   3   5    0.46    0.47
   4  -3  -5  109.16    2.75
  -4   3   5  107.21    2.90
   3  -3  -5   11.17    0.62
  -3   3   5   11.95    0.61
  -3   3   5   11.04    0.66
  -2   3   5   13.51    0.60
   1  -3  -5    2.95    0.47
  -1   3   5    3.40    0.40
  -1   3   5    3.14    0.36
   0  -3  -5    0.55    0.47
   0   3   5    1.30    0.40
  -1  -3  -5   19.68    0.97
  -2  -3  -5   18.53    0.88
  -3  -3  -5   82.91    2.25
  -4  -3  -5    4.77    0.47
  -5  -3  -5  113.49    3.09
  -5  -3  -5  111.51    2.98
  -6  -3  -5    0.39    0.50
  -6  -3  -5    0.69    0.42
  -7  -3  -5   22.61    1.19
  -7  -3  -5   22.05    1.00
  -8  -3  -5   18.80    1.23
  -8  -3  -5   18.56    0.95
  -9  -3  -5    2.50    0.52
  -9  -3  -5    1.64    0.69
 -10  -3  -5   -0.43    0.47
 -10  -3  -5    0.86    0.79
 -11  -3  -5    6.01    1.07
 -12  -3  -5   -0.20    0.94
 -13  -3  -5    1.27    1.09
 -14  -3  -5   -0.11    1.21
 -15  -3  -5   -0.67    1.35
 -14   4   5    2.07    1.33
 -13   4   5    1.65    1.16
 -12   4   5    4.09    1.18
 -11   4   5   -0.66    0.90
 -10   4   5   38.35    1.97
  -9   4   5   14.86    1.40
  -8   4   5    0.22    0.58
  -7   4   5    4.57    0.66
   6  -4  -5    0.70    0.35
  -6   4   5   -0.96    0.49
  -4   4   5  249.02    6.20
   3  -4  -5   11.87    0.68
  -3   4   5   12.27    0.72
  -2   4   5   57.01    1.65
   1  -4  -5   10.33    0.74
  -1   4   5   11.11    0.67
   0  -4  -5    4.24    0.52
  -1  -4  -5   16.49    0.91
  -2  -4  -5   35.40    1.22
  -3  -4  -5   73.94    2.08
  -4  -4  -5   -0.05    0.37
  -5  -4  -5   91.16    2.51
  -6  -4  -5    2.59    0.50
  -6  -4  -5    2.35    0.56
  -7  -4  -5   -0.62    0.46
  -7  -4  -5   -0.54    0.41
  -8  -4  -5    5.67    0.58
  -8  -4  -5    5.18    0.72
  -9  -4  -5   13.72    0.92
  -9  -4  -5   14.26    1.32
 -10  -4  -5    0.38    0.76
 -10  -4  -5    0.05    0.51
 -11  -4  -5   40.53    2.10
 -12  -4  -5    2.41    1.04
 -13  -4  -5    0.73    1.10
 -14  -4  -5   -0.44    1.19
 -15  -4  -5    1.17    1.39
 -14   5   5    0.43    1.28
 -13   5   5    4.95    1.33
 -12   5   5    0.01    1.03
 -11   5   5    0.01    0.93
 -10   5   5   27.42    1.80
  -9   5   5   -0.44    0.73
  -8   5   5    9.79    0.93
  -7   5   5   10.30    0.62
  -7   5   5   10.00    0.85
  -6   5   5    0.34    0.32
  -6   5   5    0.20    0.51
  -5   5   5   39.73    1.45
  -5   5   5   35.12    1.20
  -4   5   5  149.05    3.76
  -4   5   5  151.37    3.92
  -3   5   5   28.24    0.98
  -3   5   5   28.16    1.07
  -2   5   5  123.08    3.10
  -2   5   5  118.84    3.13
  -1   5   5    5.30    0.46
  -1   5   5    5.09    0.45
   0   5   5    4.12    0.43
   0   5   5    2.08    0.42
  -1  -5  -5  694.28   16.39
  -2  -5  -5  104.90    2.79
  -3  -5  -5    6.03    0.54
  -4  -5  -5    9.30    0.79
  -5  -5  -5   13.69    0.91
  -6  -5  -5   34.82    1.45
  -6  -5  -5   37.07    1.33
  -7  -5  -5    2.72    0.62
  -7  -5  -5    3.04    0.53
  -8  -5  -5    0.56    0.57
  -8  -5  -5    0.61    0.49
  -9  -5  -5   18.72    1.40
  -9  -5  -5   20.56    1.05
 -10  -5  -5   15.50    1.49
 -11  -5  -5   19.23    1.68
 -12  -5  -5    2.87    1.07
 -13  -5  -5    5.77    1.27
 -14  -5  -5   -0.57    1.19
 -14   6   5    0.51    1.31
 -13   6   5   35.29    2.36
 -12   6   5   13.66    1.45
 -11   6   5    5.85    1.11
 -10   6   5    0.05    0.86
  -9   6   5   40.84    1.94
  -8   6   5    1.45    0.67
  -8   6   5    0.97    0.38
  -7   6   5   32.91    1.49
  -7   6   5   31.49    1.14
  -6   6   5   18.45    1.14
  -6   6   5   19.76    0.90
  -5   6   5   30.78    1.34
  -5   6   5   32.14    1.17
  -4   6   5   88.39    2.40
  -4   6   5   86.52    2.53
  -3   6   5   45.63    1.48
  -3   6   5   42.59    1.39
  -2   6   5    7.09    0.61
  -2   6   5    8.03    0.61
  -1   6   5   99.81    2.65
  -1   6   5  100.66    2.66
   0   6   5   59.67    1.74
   0   6   5   58.80    1.71
   1   6   5   46.29    1.45
   2   6   5   41.11    1.34
  -3  -6  -5   67.63    2.01
  -4  -6  -5   59.22    1.85
  -5  -6  -5   60.04    1.91
  -6  -6  -5    9.86    0.86
  -7  -6  -5   36.36    1.52
  -7  -6  -5   37.54    1.40
  -8  -6  -5   16.21    1.22
  -8  -6  -5   17.38    1.02
  -9  -6  -5   11.33    1.04
  -9  -6  -5   12.22    0.98
 -10  -6  -5    8.21    1.08
 -11  -6  -5    2.88    1.01
 -12  -6  -5   -0.12    0.99
 -13  -6  -5    3.15    1.22
 -14  -6  -5    0.08    1.19
 -14   7   5   -0.26    1.29
 -13   7   5    0.79    1.19
 -12   7   5    0.75    1.09
 -11   7   5   29.39    2.00
 -10   7   5    7.24    1.12
  -9   7   5   16.34    1.47
  -9   7   5   15.78    0.96
  -8   7   5   20.95    1.03
  -8   7   5   20.20    1.41
  -7   7   5    6.92    0.62
  -7   7   5    8.08    0.83
  -6   7   5    9.20    0.82
  -6   7   5    8.62    0.76
  -5   7   5   58.61    1.78
  -5   7   5   55.78    1.91
  -4   7   5   51.95    1.76
  -4   7   5   52.83    1.68
  -3   7   5  133.05    3.56
  -3   7   5  135.85    3.52
  -2   7   5   88.35    2.45
  -2   7   5   87.45    2.44
  -1   7   5   46.24    1.47
  -1   7   5   44.09    1.42
   0   7   5  132.20    3.45
   0   7   5  131.52    3.40
   1   7   5   92.47    2.54
   2   7   5    5.79    0.57
   3   7   5   76.03    2.19
  -4  -7  -5    0.47    0.57
  -5  -7  -5    4.88    0.66
  -6  -7  -5    0.81    0.55
  -7  -7  -5    4.06    0.63
  -7  -7  -5    3.65    0.69
  -8  -7  -5   27.90    1.47
  -8  -7  -5   28.57    1.28
  -9  -7  -5    9.43    0.81
  -9  -7  -5    9.26    0.99
 -10  -7  -5    5.74    1.00
 -11  -7  -5   12.04    1.27
 -12  -7  -5   -0.22    1.03
 -13  -7  -5   -0.06    1.11
 -14  -7  -5    2.09    1.27
 -14   8   5   -0.37    1.32
 -13   8   5    3.38    1.32
 -12   8   5   26.45    2.10
 -11   8   5    4.87    1.16
 -10   8   5    0.52    0.94
  -9   8   5    3.04    0.92
  -9   8   5    3.12    0.61
  -8   8   5   -0.17    0.48
  -8   8   5   -1.60    0.64
  -7   8   5    6.84    0.85
  -7   8   5    8.15    0.70
  -6   8   5   12.34    1.04
  -6   8   5   12.96    0.93
  -5   8   5   25.46    1.15
  -5   8   5   24.31    1.25
  -4   8   5    0.17    0.46
  -4   8   5    0.75    0.50
  -3   8   5   40.47    1.52
  -3   8   5   43.94    1.54
  -2   8   5   15.91    0.94
  -2   8   5   14.64    0.91
  -1   8   5  144.34    3.76
  -1   8   5  141.02    3.70
   0   8   5    2.99    0.47
   0   8   5    3.15    0.50
   1   8   5  131.95    3.52
   2   8   5   98.32    2.76
   3   8   5   34.94    1.43
   4   8   5   -0.46    0.50
  -5  -8  -5   85.45    2.52
  -6  -8  -5   58.96    1.95
  -7  -8  -5    1.11    0.60
  -7  -8  -5    1.46    0.67
  -8  -8  -5   10.10    0.97
  -8  -8  -5    7.90    0.81
  -9  -8  -5    2.13    0.82
  -9  -8  -5    3.35    0.70
 -10  -8  -5    2.87    0.92
 -11  -8  -5    0.34    0.97
 -12  -8  -5    0.02    0.99
 -13  -8  -5    0.68    1.17
 -14  -8  -5    1.32    1.28
 -13   9   5   -0.70    1.23
 -12   9   5    0.57    1.16
 -11   9   5    3.94    1.20
 -10   9   5   14.71    1.38
  -9   9   5   25.88    1.37
  -9   9   5   24.20    1.74
  -8   9   5    7.32    0.78
  -8   9   5    5.64    0.92
  -7   9   5   13.26    1.22
  -7   9   5   12.66    1.04
  -6   9   5   11.07    1.08
  -6   9   5   12.12    0.99
  -5   9   5    0.25    0.50
  -5   9   5   -0.12    0.46
  -4   9   5    7.76    0.76
  -4   9   5    8.47    0.74
  -3   9   5    0.08    0.50
  -3   9   5    0.00    0.46
  -2   9   5   14.69    1.00
  -2   9   5   14.84    0.96
  -1   9   5   59.41    1.87
  -1   9   5   61.48    1.98
   0   9   5    9.28    0.84
   0   9   5   11.21    0.94
   1   9   5   19.12    1.13
   2   9   5    0.85    0.53
   3   9   5  100.88    2.88
   4   9   5   59.21    1.97
   5   9   5   10.99    0.92
  -6  -9  -5    2.86    0.71
  -7  -9  -5    8.03    0.81
  -7  -9  -5    7.23    0.88
  -8  -9  -5    8.94    0.89
  -8  -9  -5    6.60    0.90
  -9  -9  -5   -0.18    0.78
  -9  -9  -5    0.17    0.69
 -10  -9  -5    3.75    0.98
 -11  -9  -5   -0.29    0.96
 -12  -9  -5    3.99    1.17
 -13  -9  -5   -0.84    1.14
 -14  -9  -5   -1.89    1.19
 -13  10   5    0.33    1.31
 -12  10   5    0.12    1.15
 -11  10   5   13.38    1.50
 -10  10   5   25.91    1.95
  -9  10   5    7.48    0.88
  -9  10   5    7.24    1.10
  -8  10   5    2.93    0.73
  -8  10   5    3.57    0.90
  -7  10   5   22.97    1.32
  -7  10   5   23.90    1.50
  -6  10   5    0.00    0.54
  -6  10   5   -0.89    0.58
  -5  10   5    6.24    0.72
  -5  10   5    6.46    0.75
  -4  10   5   13.34    1.02
  -4  10   5   12.83    1.03
  -3  10   5   35.09    1.42
  -3  10   5   34.00    1.45
  -2  10   5   21.17    1.18
  -2  10   5   20.59    1.08
  -1  10   5    4.74    0.69
  -1  10   5    4.90    0.60
   0  10   5   53.63    1.76
   0  10   5   55.17    1.90
   1  10   5   58.69    1.98
   2  10   5    7.50    0.75
   3  10   5   29.15    1.38
   4  10   5    3.02    0.63
   5  10   5    1.49    0.62
  -7 -10  -5    7.80    0.94
  -8 -10  -5    1.73    0.79
  -8 -10  -5    1.57    0.77
  -9 -10  -5    4.10    0.95
  -9 -10  -5    4.14    0.86
 -10 -10  -5   -0.12    0.90
 -11 -10  -5    0.48    0.97
 -12 -10  -5   -0.11    1.08
 -13 -10  -5    0.77    1.22
 -13  11   5    4.19    1.44
 -12  11   5    0.97    1.23
 -11  11   5   -0.06    1.08
 -10  11   5    3.50    1.07
  -9  11   5   -0.25    0.87
  -9  11   5   -0.54    0.69
  -8  11   5   46.97    2.00
  -8  11   5   50.83    2.25
  -7  11   5    1.55    0.78
  -7  11   5    2.38    0.75
  -6  11   5   13.39    1.22
  -6  11   5   15.40    1.26
  -5  11   5    0.90    0.61
  -5  11   5    1.05    0.61
  -4  11   5   -0.46    0.54
  -4  11   5    0.77    0.56
  -3  11   5    4.80    0.70
  -3  11   5    4.68    0.66
  -2  11   5   12.40    0.97
  -2  11   5   12.67    1.04
  -1  11   5    1.05    0.59
  -1  11   5    1.41    0.51
   0  11   5    8.38    0.72
   0  11   5    8.63    0.81
   1  11   5   25.75    1.35
   2  11   5   56.62    1.99
   3  11   5   37.41    1.58
   4  11   5    1.03    0.59
   5  11   5   36.90    1.61
  -7 -11  -5    3.66    0.91
  -8 -11  -5    1.05    0.82
  -8 -11  -5    0.06    0.83
  -9 -11  -5   -0.30    0.83
  -9 -11  -5    0.45    0.84
 -10 -11  -5    0.87    0.92
 -11 -11  -5   19.22    1.78
 -12 -11  -5    9.10    1.37
 -13 -11  -5    0.11    1.15
 -12  12   5    6.60    1.41
 -11  12   5    2.98    1.18
 -10  12   5   -0.07    1.00
  -9  12   5   -0.61    0.77
  -9  12   5    0.63    0.96
  -8  12   5   17.75    1.40
  -8  12   5   18.53    1.51
  -7  12   5    3.71    0.92
  -7  12   5    1.88    0.81
  -6  12   5   -0.66    0.66
  -6  12   5    2.18    0.77
  -5  12   5   10.00    0.98
  -5  12   5   10.16    0.96
  -4  12   5    8.93    0.91
  -4  12   5    8.43    0.84
  -3  12   5    9.80    0.94
  -3  12   5   12.78    1.02
  -2  12   5   19.54    1.24
  -2  12   5   17.92    1.11
  -1  12   5   20.57    1.13
  -1  12   5   19.68    1.26
   0  12   5   18.06    1.07
   0  12   5   17.88    1.23
   1  12   5    3.68    0.70
   2  12   5   14.79    1.17
   3  12   5    3.15    0.72
   4  12   5    4.61    0.81
   5  12   5    4.43    0.83
   6  12   5    1.38    0.79
  -8 -12  -5    0.13    0.85
  -8 -12  -5    1.60    0.92
  -9 -12  -5   16.88    1.58
  -9 -12  -5   17.71    1.51
 -10 -12  -5   10.62    1.22
 -11 -12  -5   -0.81    0.98
 -12 -12  -5   -0.82    1.08
 -13 -12  -5    1.01    1.20
 -12  13   5    0.39    1.26
 -11  13   5    7.21    1.38
 -10  13   5    6.95    1.25
  -9  13   5    0.09    0.83
  -9  13   5    1.05    0.99
  -8  13   5    3.84    1.02
  -8  13   5    1.50    0.88
  -7  13   5    1.56    0.89
  -7  13   5    2.41    0.89
  -6  13   5    4.37    0.92
  -5  13   5    4.01    0.85
  -5  13   5    3.35    0.82
  -4  13   5   67.52    2.29
  -4  13   5   60.26    2.30
  -3  13   5   34.45    1.57
  -3  13   5   37.03    1.72
  -2  13   5   -0.24    0.62
  -2  13   5   -0.07    0.57
  -1  13   5    8.87    0.92
  -1  13   5    6.90    0.76
   0  13   5  135.15    3.93
   0  13   5  138.21    3.73
   1  13   5    1.44    0.66
   2  13   5    5.12    0.82
   3  13   5    9.85    0.99
   4  13   5    4.96    0.87
   5  13   5    0.35    0.81
   6  13   5    6.96    1.02
  -8 -13  -5    3.55    1.05
  -8 -13  -5    4.70    1.01
  -9 -13  -5    1.96    1.01
  -9 -13  -5    1.01    0.91
 -10 -13  -5    0.84    0.96
 -11 -13  -5    0.84    1.04
 -12 -13  -5    6.62    1.37
 -12  14   5    0.63    1.28
 -11  14   5    4.20    1.28
 -10  14   5   -0.56    1.06
 -10  14   5   -2.13    0.91
  -9  14   5   13.52    1.33
  -9  14   5   18.34    1.77
  -8  14   5    0.48    0.89
  -8  14   5    0.20    0.95
  -7  14   5    1.78    0.95
  -7  14   5    1.20    0.92
  -6  14   5    4.43    0.97
  -6  14   5    5.11    0.97
  -5  14   5    3.88    0.94
  -5  14   5    5.08    0.93
  -4  14   5   24.59    1.62
  -4  14   5   24.21    1.50
  -3  14   5    3.63    0.87
  -3  14   5    5.51    0.83
  -2  14   5   18.17    1.42
  -2  14   5   18.54    1.27
  -1  14   5   88.14    2.89
  -1  14   5   88.71    2.72
   0  14   5   34.73    1.57
   0  14   5   36.38    1.77
   1  14   5    5.15    0.89
   2  14   5   18.55    1.49
  -3 -14  -5    0.67    0.79
   3  14   5    1.73    0.81
   4  14   5    0.36    0.83
   5  14   5    0.35    0.88
   6  14   5    0.59    0.88
  -8 -14  -5   26.89    1.80
   8  14   5   26.16    1.73
  -9 -14  -5    6.12    1.17
  -9 -14  -5    7.48    1.10
 -10 -14  -5    3.13    1.06
 -11 -14  -5    5.35    1.22
 -12 -14  -5    0.02    1.17
 -11  15   5    3.66    1.31
 -10  15   5    4.17    1.22
 -10  15   5    2.31    1.11
  -9  15   5    1.87    1.11
  -9  15   5   -1.31    0.93
  -8  15   5    1.28    0.97
  -8  15   5    2.26    1.04
  -7  15   5   19.01    1.71
  -7  15   5   15.90    1.42
  -6  15   5    2.17    1.01
  -6  15   5    2.69    0.96
  -5  15   5   -0.51    0.86
  -5  15   5   -0.67    0.80
  -4  15   5    0.41    0.78
  -4  15   5    0.49    0.88
  -3  15   5   17.50    1.35
  -3  15   5   13.73    1.26
  -2  15   5   74.02    2.46
  -2  15   5   70.72    2.67
  -1  15   5    1.67    0.88
   0  15   5   13.17    1.21
   1  15   5    3.52    0.95
   2  15   5    1.36    0.89
  -3 -15  -5    1.96    0.82
   3  15   5    2.64    0.94
  -4 -15  -5    2.57    0.95
   4  15   5    0.53    0.96
   5  15   5   -1.13    0.92
   6  15   5    0.43    0.97
   7  15   5    5.96    1.15
  -8 -15  -5    3.78    1.02
  -9 -15  -5    0.53    1.16
  -9 -15  -5    2.01    0.95
 -10 -15  -5   16.14    1.45
 -11 -15  -5    1.14    1.15
 -10  16   5    2.18    1.24
 -10  16   5    2.18    1.16
  -9  16   5    4.86    1.22
  -9  16   5    5.83    1.28
  -8  16   5    0.50    1.03
  -8  16   5    2.41    1.10
  -7  16   5   -0.07    0.94
  -7  16   5   -1.15    0.98
  -6  16   5   12.31    1.38
  -6  16   5   11.71    1.27
  -5  16   5   11.01    1.34
  -5  16   5   10.80    1.15
  -4  16   5    0.61    0.81
  -4  16   5   -0.97    0.89
  -3  16   5   12.84    1.13
  -3  16   5   10.72    1.25
  -2  16   5    0.32    0.91
  -1  16   5    0.80    0.92
   0  16   5   -0.81    0.86
   1  16   5    0.53    0.96
   2  16   5   -0.46    0.93
   3  16   5    1.89    1.01
  -4 -16  -5   16.96    1.29
   4  16   5   14.49    1.43
  -5 -16  -5    0.44    1.04
   5  16   5   -0.11    1.04
   6  16   5    0.79    1.02
   7  16   5   -0.51    1.03
  -8 -16  -5   18.20    1.68
  -9 -16  -5    3.62    1.00
 -10 -16  -5    2.91    1.10
 -11 -16  -5    2.05    1.19
 -10  17   5    4.73    1.30
 -10  17   5    4.48    1.33
  -9  17   5   -1.58    1.07
  -9  17   5    0.44    1.12
  -8  17   5    5.10    1.22
  -8  17   5    6.98    1.33
  -7  17   5    3.23    1.10
  -7  17   5    3.43    1.18
  -6  17   5    2.42    1.13
  -6  17   5    2.16    1.02
  -5  17   5   22.55    1.76
  -5  17   5   21.74    1.91
  -4  17   5   -0.53    0.98
  -4  17   5    0.04    0.83
  -3  17   5    3.28    1.07
  -3  17   5    3.30    0.93
  -2  17   5    4.63    1.12
  -1  17   5    0.32    0.97
   0  17   5    0.50    0.98
   1  17   5    0.71    1.05
   2  17   5    9.49    1.32
  -3 -17  -5   -0.82    0.82
   3  17   5   -0.70    1.03
  -4 -17  -5   -0.65    0.90
   4  17   5   -0.50    1.05
  -5 -17  -5    3.40    1.09
   5  17   5    2.48    1.17
  -6 -17  -5    6.66    1.28
   6  17   5    6.65    1.28
  -7 -17  -5    2.79    1.20
   7  17   5    1.16    1.14
  -8 -17  -5    1.49    1.01
  -9 -17  -5   14.15    1.35
 -10 -17  -5    0.76    1.09
  -9  18   5    1.24    1.26
  -9  18   5    0.51    1.17
  -8  18   5    1.33    1.12
  -8  18   5   -0.44    1.17
  -7  18   5    8.87    1.44
  -7  18   5    8.33    1.33
  -6  18   5    8.44    1.39
  -6  18   5    6.87    1.21
  -5  18   5    0.44    1.12
  -5  18   5    0.88    0.96
  -4  18   5   11.74    1.21
  -4  18   5    7.15    1.31
  -3  18   5   -0.02    1.06
  -2  18   5    2.04    1.10
  -1  18   5    0.52    0.82
  -1  18   5    0.69    1.05
   0  18   5    1.25    1.12
   1  18   5    0.81    1.12
   2  18   5    9.88    1.39
   3  18   5    0.20    1.11
  -4 -18  -5    2.48    1.02
   4  18   5    0.91    1.16
  -5 -18  -5    9.46    1.26
   5  18   5    8.39    1.39
  -6 -18  -5    2.71    1.15
   6  18   5    0.74    1.19
  -7 -18  -5    3.47    1.30
   7  18   5    1.81    1.22
  -8 -18  -5    1.34    1.40
   8  18   5   -2.65    1.13
  -9 -18  -5    9.81    1.63
  -8  19   5   -0.72    1.19
  -8  19   5   -0.33    1.26
  -7  19   5    1.78    1.32
  -7  19   5    2.12    1.13
  -6  19   5    9.96    1.54
  -6  19   5   10.75    1.37
  -5  19   5   -0.27    1.13
  -5  19   5   -0.57    0.97
  -4  19   5    0.38    1.17
  -3  19   5   13.60    1.58
  -2  19   5   -0.15    0.90
  -2  19   5   -0.63    1.10
  -1  19   5    0.99    0.83
  -1  19   5   -0.01    1.10
   0  19   5    2.46    1.20
   1  19   5    0.60    1.20
   2  19   5    6.97    1.42
   3  19   5   18.47    1.72
   4  19   5    2.05    1.27
   5  19   5   10.64    1.51
  -6 -19  -5    3.58    1.26
   6  19   5   -0.19    1.25
  -7 -19  -5   -0.71    1.25
   7  19   5    0.04    1.26
  -8 -19  -5    0.92    1.37
   8  19   5    0.12    1.32
  -7  20   5    0.10    1.18
  -7  20   5   -0.73    1.34
  -6  20   5   -1.35    1.28
  -6  20   5   -2.48    1.00
  -5  20   5    7.42    1.49
  -4  20   5    4.22    1.34
  -3  20   5   -0.62    0.98
  -3  20   5    0.58    1.20
  -2  20   5    5.58    1.41
  -2  20   5    7.30    1.06
  -1  20   5    0.82    1.22
   0  20   5   -0.01    1.24
   1  20   5    1.97    1.32
   2  20   5   -0.28    1.28
   3  20   5   -1.28    1.19
   4  20   5   -1.12    1.22
   5  20   5    1.75    1.33
   6  20   5   -1.33    1.32
   7  20   5   -0.65    1.33
  -6  21   5    3.59    1.52
  -5  21   5    1.62    1.39
  -4  21   5    0.08    1.33
  -3  21   5   -0.39    1.31
  -2  21   5    0.61    1.29
  -1  21   5   -0.45    1.27
   0  21   5    1.79    1.34
   1  21   5   14.06    1.73
   2  21   5    1.98    1.42
   3  21   5   -2.22    1.33
   4  21   5   -0.97    1.36
   5  21   5    0.79    1.45
   6  21   5   -0.24    1.40
  -4  22   5   -0.89    1.44
  -3  22   5    0.42    1.44
  -2  22   5   -0.89    1.36
  -1  22   5    4.05    1.51
   0  22   5    2.72    1.47
   1  22   5    0.86    1.50
   2  22   5    4.86    1.58
   3  22   5    1.03    1.48
   4  22   5   -0.18    1.51
   2  18  -6    0.29    1.47
   1  18  -6    1.70    1.46
  -1 -18   6   -0.61    1.31
   0  18  -6   -0.25    1.42
   0 -18   6   -0.14    1.36
  -1  18  -6   -1.30    1.43
  -2  18  -6   -0.27    1.50
   5  17  -6   -0.58    1.42
   4  17  -6   -0.74    1.30
  -4 -17   6   -0.90    1.34
   3  17  -6    0.63    1.35
  -3 -17   6   -1.31    1.27
   2  17  -6   10.55    1.66
  -2 -17   6   11.83    1.50
   1  17  -6    0.55    1.35
  -1 -17   6    0.27    1.21
   0  17  -6    7.80    1.58
   0 -17   6    7.78    1.37
  -1  17  -6   -0.86    1.31
   1 -17   6   -1.40    1.16
  -2  17  -6    0.09    1.35
  -3  17  -6    0.13    1.34
  -4  17  -6   -1.22    1.35
  -5  17  -6   -0.07    1.43
   6  16  -6    2.60    1.43
  -6 -16   6    2.27    1.44
   5  16  -6    2.34    1.39
  -5 -16   6   -0.90    1.32
   4  16  -6    0.80    1.30
  -4 -16   6    0.72    1.34
   3  16  -6   -0.09    1.22
  -3 -16   6   -1.18    1.19
   2  16  -6    0.75    1.27
  -2 -16   6    0.20    1.20
   1  16  -6    5.47    1.37
  -1 -16   6    3.12    1.21
   0  16  -6    0.02    1.26
   0 -16   6   -0.04    1.12
  -1  16  -6   10.07    1.56
   1 -16   6    7.14    1.29
  -2  16  -6    2.18    1.32
  -3  16  -6    1.20    1.29
  -4  16  -6    1.23    1.34
  -5  16  -6    0.23    1.32
  -6  16  -6    0.70    1.38
  -7  16  -6    1.98    1.51
  -7 -15   6    7.34    1.53
   6  15  -6    1.49    1.29
  -6 -15   6    1.52    1.32
   5  15  -6    4.91    1.40
  -5 -15   6    2.62    1.31
   4  15  -6   -0.33    1.18
  -4 -15   6    0.20    1.24
   3  15  -6   -1.61    1.13
  -3 -15   6    0.05    1.13
   2  15  -6    0.13    1.20
  -2 -15   6   -1.43    1.09
   1  15  -6    0.95    1.22
  -1 -15   6   -1.12    1.05
   0  15  -6    0.78    1.22
   0 -15   6    2.12    1.08
  -1  15  -6    0.47    1.19
   1 -15   6    0.65    1.07
  -2  15  -6    2.93    1.24
   2 -15   6    3.29    1.11
  -3  15  -6   -2.95    1.12
  -4  15  -6    0.07    1.19
  -5  15  -6   -0.42    1.21
  -6  15  -6    7.11    1.48
  -7  15  -6    1.11    1.38
  -8  15  -6   -2.04    1.31
  -8 -14   6    2.11    1.44
  -7 -14   6    0.03    1.31
   6  14  -6    0.58    1.19
  -6 -14   6    1.09    1.21
   5  14  -6    3.21    1.25
  -5 -14   6    3.44    1.28
   4  14  -6   -0.03    1.15
  -4 -14   6    0.17    1.14
   3  14  -6    5.28    1.28
  -3 -14   6    6.68    1.25
  -2 -14   6   17.68    1.48
   1  14  -6   16.12    1.57
  -1 -14   6   15.27    1.37
   0  14  -6    0.84    1.15
   0 -14   6    1.66    1.06
  -1  14  -6   -0.02    1.11
   1 -14   6   -0.79    0.97
  -2  14  -6    8.54    1.40
   2 -14   6    8.78    1.21
  -3  14  -6    9.53    1.41
  -4  14  -6    1.18    1.19
  -5  14  -6    9.44    1.50
  -6  14  -6    8.01    1.48
  -7  14  -6    0.75    1.28
  -8  14  -6   -0.13    1.31
  -9  14  -6    1.74    1.44
  -9 -13   6   -0.76    1.37
  -8 -13   6   -0.22    1.27
   7  13  -6   -0.31    1.08
  -7 -13   6    0.19    1.23
  -6 -13   6    0.30    1.16
   5  13  -6    4.52    1.22
  -5 -13   6    3.81    1.23
   4  13  -6    2.28    1.11
  -4 -13   6   -0.07    1.05
  -3 -13   6   41.26    2.13
   2  13  -6    0.43    1.06
  -2 -13   6    0.42    0.99
   1  13  -6    5.12    1.21
  -1 -13   6    3.02    1.04
   0  13  -6   37.50    2.14
   0 -13   6   38.27    1.97
  -1  13  -6    3.37    1.15
   1 -13   6    3.23    1.03
  -2  13  -6    0.20    1.05
   2 -13   6   -0.13    0.95
  -3  13  -6   -1.39    1.01
  -4  13  -6    1.68    1.10
  -5  13  -6    0.42    1.12
  -6  13  -6    1.84    1.19
  -7  13  -6    0.45    1.20
  -8  13  -6    0.05    1.22
  -9  13  -6    2.59    1.34
 -10  13  -6   -0.47    1.33
 -10 -12   6    5.52    1.48
  -9 -12   6    2.52    1.35
  -8 -12   6    3.97    1.34
   7  12  -6    6.07    1.15
  -7 -12   6    4.35    1.30
  -6 -12   6   -0.76    1.08
   5  12  -6    0.91    1.01
  -5 -12   6    0.20    1.03
   4  12  -6   -0.04    1.00
  -4 -12   6    1.31    1.03
   3  12  -6    4.45    1.11
  -3 -12   6    3.77    1.04
   2  12  -6   13.75    1.38
  -2 -12   6   15.37    1.31
   1  12  -6   -0.78    0.96
  -1 -12   6   -0.76    0.92
   0  12  -6    5.51    1.13
   0 -12   6    7.96    1.08
  -1  12  -6   30.31    1.94
   1 -12   6   28.52    1.78
  -2  12  -6    0.74    0.97
   2 -12   6    1.76    0.99
  -3  12  -6    1.54    1.00
  -4  12  -6    3.68    1.14
  -5  12  -6    3.43    1.14
  -6  12  -6    1.88    1.15
  -7  12  -6    6.50    1.32
  -8  12  -6    1.41    1.22
  -9  12  -6   -0.59    1.22
 -10  12  -6    5.53    1.43
 -11 -11   6   -0.17    1.39
 -10 -11   6    0.52    1.32
  -9 -11   6   -0.57    1.20
  -8 -11   6   -0.12    1.15
   7  11  -6   -0.86    0.91
  -7 -11   6    0.51    1.09
   6  11  -6    6.55    1.22
  -6 -11   6    6.36    1.20
   5  11  -6    8.46    1.17
  -5 -11   6    6.35    1.16
   4  11  -6    4.22    1.00
  -4 -11   6    5.41    1.06
   3  11  -6    6.43    1.08
  -3 -11   6    5.63    1.01
   2  11  -6   -0.69    0.87
  -2 -11   6    0.75    0.87
   1  11  -6   -0.54    0.89
  -1 -11   6   -0.90    0.81
   0  11  -6    2.76    0.99
   0 -11   6    3.05    0.89
  -1  11  -6    1.85    0.93
   1 -11   6    3.96    0.93
  -2  11  -6   29.07    1.82
   2 -11   6   31.11    1.72
  -3  11  -6    2.12    0.93
  -4  11  -6    9.17    1.21
  -5  11  -6   12.85    1.35
  -6  11  -6    0.09    1.03
  -7  11  -6   -0.47    1.04
  -7  11  -6    0.36    0.80
  -8  11  -6   -0.63    0.92
  -8  11  -6    0.65    1.13
  -9  11  -6   -0.50    1.14
 -10  11  -6    0.02    1.19
 -11  11  -6   -0.49    1.23
 -11  11  -6    0.84    1.20
 -11 -10   6   -0.64    1.30
 -10 -10   6    7.22    1.41
  -9 -10   6    0.73    1.15
  -8 -10   6    1.09    1.07
   7  10  -6   -0.82    0.86
  -7 -10   6   -0.18    0.99
   6  10  -6    3.59    0.96
  -6 -10   6    4.92    1.10
  -5 -10   6    0.39    0.94
   4  10  -6   10.94    1.14
  -4 -10   6   10.50    1.14
   3  10  -6    8.50    1.03
  -3 -10   6    5.89    0.98
   2  10  -6    6.13    0.99
  -2 -10   6    7.88    0.97
   1  10  -6   11.24    1.11
  -1 -10   6   12.12    1.06
   0  10  -6    0.20    0.76
   0 -10   6    0.35    0.73
  -1  10  -6   -0.58    0.72
   1 -10   6   -0.11    0.73
  -2  10  -6   -0.70    0.74
   2 -10   6    1.63    0.79
  -3  10  -6    7.26    1.02
  -4  10  -6    7.54    1.07
  -4  10  -6   11.01    0.97
  -5  10  -6    0.02    0.89
  -5  10  -6    0.02    0.65
  -6  10  -6   19.66    1.69
  -6  10  -6   21.19    1.43
  -7  10  -6    4.37    0.89
  -7  10  -6    3.52    1.09
  -8  10  -6   -0.16    0.87
  -8  10  -6   -1.22    0.97
  -9  10  -6   -2.75    1.03
 -10  10  -6   -0.23    1.06
 -10  10  -6    0.91    1.15
 -11  10  -6    0.97    1.19
 -11  10  -6    1.60    1.21
 -12  10  -6   -2.03    1.23
 -12  -9   6    0.51    1.33
 -11  -9   6    1.68    1.23
 -10  -9   6    0.22    1.13
  -9  -9   6    9.41    1.34
  -8  -9   6   -1.11    1.01
   7   9  -6   16.64    1.41
  -7  -9   6   13.25    1.33
   6   9  -6   30.95    1.70
  -6  -9   6   28.49    1.83
  -5  -9   6    4.44    0.95
   4   9  -6    3.47    0.85
  -4  -9   6    3.70    0.88
   3   9  -6    8.04    0.96
  -3  -9   6    8.59    0.95
   2   9  -6   15.34    1.26
  -2  -9   6   13.78    1.24
   1   9  -6    0.44    0.69
  -1  -9   6    1.22    0.67
   0   9  -6    1.03    0.70
   0  -9   6    1.86    0.69
  -1   9  -6    0.15    0.72
   1  -9   6    1.30    0.70
  -2   9  -6   10.06    1.03
   2  -9   6   11.07    0.97
  -3   9  -6   -0.62    0.44
  -3   9  -6    0.24    0.74
  -4   9  -6    6.00    0.99
  -4   9  -6    7.23    0.69
  -5   9  -6    8.25    1.11
  -6   9  -6   19.05    1.70
  -6   9  -6   20.84    1.41
  -7   9  -6    0.63    0.82
  -7   9  -6    2.83    1.04
  -8   9  -6    1.99    1.05
  -9   9  -6    0.63    0.98
  -9   9  -6    0.23    0.99
 -10   9  -6    0.48    1.01
 -10   9  -6   -0.35    1.06
 -11   9  -6    2.13    1.18
 -11   9  -6    2.46    1.16
 -12   9  -6   -1.46    1.18
 -12  -8   6    2.41    1.30
 -11  -8   6   10.32    1.47
 -10  -8   6    4.57    1.21
  -9  -8   6   24.59    1.94
  -8  -8   6    1.07    0.98
   7   8  -6   14.29    1.28
  -7  -8   6   13.91    1.32
  -7  -8   6   14.84    1.21
   6   8  -6   14.43    1.27
  -6  -8   6   12.95    1.06
  -6  -8   6   10.30    1.14
   5   8  -6   41.16    1.73
  -5  -8   6   42.53    1.37
  -5  -8   6   44.50    1.91
  -4  -8   6    2.23    0.77
   3   8  -6   -0.19    0.63
  -3  -8   6    0.65    0.65
   2   8  -6   -0.22    0.62
  -2  -8   6    0.23    0.63
   1   8  -6    8.20    0.89
  -1  -8   6    7.66    0.81
   0   8  -6    5.01    0.76
   0  -8   6    4.17    0.71
  -1   8  -6    2.27    0.72
   1  -8   6    3.17    0.70
  -2   8  -6   40.30    1.78
   2  -8   6   43.80    1.67
  -3   8  -6   23.85    1.01
  -3   8  -6   22.70    1.44
  -4   8  -6    5.32    0.91
  -4   8  -6    4.69    0.63
  -5   8  -6    8.03    0.79
  -5   8  -6   11.25    1.12
  -6   8  -6   -1.18    0.64
  -6   8  -6   -0.64    0.82
  -7   8  -6    0.53    0.92
  -8   8  -6   -0.01    0.95
  -9   8  -6   -0.80    0.93
  -9   8  -6   -0.52    0.95
 -10   8  -6    4.54    1.17
 -10   8  -6    1.92    1.04
 -11   8  -6    0.43    1.13
 -11   8  -6    0.49    1.06
 -12   8  -6    0.80    1.19
 -13   8  -6    0.30    1.31
 -13  -7   6    1.16    1.30
 -12  -7   6    0.92    1.18
 -11  -7   6    1.41    1.00
 -11  -7   6    3.05    1.17
 -10  -7   6    3.71    1.14
 -10  -7   6    6.31    1.05
  -9  -7   6    9.00    1.27
  -9  -7   6    9.98    1.04
  -8  -7   6   -1.12    0.87
  -8  -7   6    1.62    0.73
   7   7  -6    6.81    0.84
  -7  -7   6    3.72    1.00
  -7  -7   6    6.07    0.78
   6   7  -6   31.06    1.43
  -6  -7   6   27.72    1.24
  -6  -7   6   29.56    1.65
   5   7  -6    2.68    0.68
  -5  -7   6    2.44    0.46
  -5  -7   6    3.68    0.80
  -4  -7   6   54.29    1.97
   3   7  -6    6.91    0.77
  -3  -7   6    7.03    0.80
   2   7  -6   13.62    1.09
  -2  -7   6   12.29    1.05
   1   7  -6    0.03    0.55
  -1  -7   6    0.14    0.57
   0   7  -6    5.89    0.76
   0  -7   6    4.82    0.68
  -1   7  -6   11.23    1.04
   1  -7   6   10.40    0.86
  -2   7  -6   40.01    1.69
   2  -7   6   42.31    1.60
  -3   7  -6   12.16    1.13
  -3   7  -6   12.81    0.77
  -4   7  -6    0.75    0.66
  -4   7  -6    1.70    0.50
  -5   7  -6    3.81    0.81
  -5   7  -6    3.80    0.66
  -6   7  -6   12.77    1.13
  -6   7  -6   13.75    1.19
  -7   7  -6    1.29    0.88
  -8   7  -6    2.41    0.97
  -8   7  -6    2.81    0.94
  -9   7  -6    0.37    0.94
  -9   7  -6    0.54    0.97
 -10   7  -6   19.68    1.85
 -10   7  -6   20.88    1.74
 -11   7  -6    5.77    1.15
 -11   7  -6    5.51    1.27
 -12   7  -6    2.75    1.27
 -13   7  -6    3.08    1.41
 -13  -6   6    1.02    1.19
 -13  -6   6    0.27    1.29
 -12  -6   6   25.01    2.11
 -12  -6   6   23.55    1.95
 -11  -6   6    0.96    0.96
 -11  -6   6    2.28    1.14
 -10  -6   6   14.69    1.28
 -10  -6   6   14.24    1.45
  -9  -6   6   19.44    1.48
  -9  -6   6   19.28    1.70
  -8  -6   6    6.14    0.90
  -8  -6   6    6.58    1.09
   7   6  -6   22.44    1.20
  -7  -6   6   21.24    1.24
  -7  -6   6   21.70    1.54
   6   6  -6   -0.62    0.56
  -6  -6   6    0.14    0.70
  -6  -6   6    0.06    0.49
   5   6  -6    0.59    0.54
  -5  -6   6    0.79    0.40
  -5  -6   6   -0.18    0.61
   4   6  -6    4.48    0.70
  -4  -6   6    6.21    0.76
   3   6  -6    7.18    0.72
  -3  -6   6    7.48    0.79
   2   6  -6   14.72    1.04
  -2  -6   6   13.99    1.05
   1   6  -6    0.07    0.54
  -1  -6   6    0.64    0.56
   0   6  -6   -0.33    0.52
   0  -6   6    0.78    0.55
  -1   6  -6    3.83    0.65
   1  -6   6    2.99    0.63
  -2   6  -6   55.73    1.55
   2  -6   6   56.83    1.85
  -3   6  -6   45.47    1.42
  -3   6  -6   43.72    1.73
  -4   6  -6   19.55    1.23
  -4   6  -6   19.97    1.01
  -5   6  -6    0.83    0.53
  -5   6  -6    1.63    0.66
  -6   6  -6    5.34    0.85
  -7   6  -6    3.34    0.83
  -7   6  -6    2.54    0.82
  -8   6  -6    0.73    0.86
  -8   6  -6    0.37    0.85
  -9   6  -6    0.55    0.99
  -9   6  -6    0.00    0.88
 -10   6  -6   17.61    1.62
 -10   6  -6   16.28    1.46
 -11   6  -6    5.39    1.28
 -11   6  -6    4.80    1.11
 -12   6  -6   16.48    1.64
 -13   6  -6    2.15    1.39
 -13  -5   6    0.93    1.22
 -13  -5   6   -0.23    1.11
 -12  -5   6   -0.05    1.15
 -12  -5   6    0.72    1.05
 -11  -5   6    9.55    1.36
 -11  -5   6   10.63    1.23
 -10  -5   6    1.94    1.05
 -10  -5   6    0.43    0.90
  -9  -5   6    1.80    1.01
  -9  -5   6    1.18    0.83
  -8  -5   6   16.49    1.52
  -8  -5   6   16.14    1.26
   7   5  -6   17.66    1.01
  -7  -5   6   18.98    1.42
  -7  -5   6   17.18    1.15
   6   5  -6   26.10    1.15
  -6  -5   6   23.81    1.44
  -6  -5   6   25.58    1.14
   5   5  -6    4.65    0.60
  -5  -5   6    4.65    0.50
  -5  -5   6    4.82    0.77
   4   5  -6    0.68    0.49
  -4  -5   6    0.74    0.33
  -4  -5   6    0.61    0.56
  -3  -5   6   15.68    1.07
   2   5  -6   38.83    1.47
  -2  -5   6   37.92    1.47
   1   5  -6   14.05    0.99
  -1  -5   6   14.57    1.01
   0   5  -6    1.54    0.57
   0  -5   6    0.99    0.55
  -1   5  -6    7.87    0.76
   1  -5   6    6.68    0.71
  -2   5  -6   12.87    0.67
  -2   5  -6   13.60    1.03
   2  -5   6   12.99    0.99
  -3   5  -6   28.28    1.34
  -3   5  -6   30.74    1.09
  -4   5  -6   11.11    1.03
  -4   5  -6   10.40    0.84
  -5   5  -6   15.90    1.14
  -5   5  -6   14.68    1.02
  -6   5  -6   -0.35    0.64
  -6   5  -6   -0.38    0.42
  -7   5  -6    5.95    0.84
  -7   5  -6    7.55    0.91
  -8   5  -6    7.63    1.01
  -8   5  -6    6.61    0.98
  -9   5  -6   13.24    1.27
  -9   5  -6   14.07    1.21
 -10   5  -6   27.91    1.73
 -10   5  -6   30.91    1.92
 -11   5  -6    6.76    1.07
 -11   5  -6    7.11    1.31
 -12   5  -6    7.29    1.41
 -13   5  -6    0.53    1.31
 -14   5  -6    6.24    1.64
 -13  -4   6    7.59    1.35
 -13  -4   6    4.58    1.38
 -12  -4   6   -0.32    1.01
 -12  -4   6    1.72    1.18
 -11  -4   6    6.01    1.23
 -11  -4   6    5.31    1.09
 -10  -4   6    9.36    1.13
 -10  -4   6    8.79    1.28
  -9  -4   6   13.22    1.12
  -9  -4   6   13.79    1.30
  -8  -4   6    3.23    0.74
  -8  -4   6    1.51    0.89
  -7  -4   6    0.96    0.58
  -7  -4   6    1.03    0.71
   6   4  -6    0.53    0.43
  -6  -4   6    0.49    0.46
  -6  -4   6   -0.14    0.61
   5   4  -6    3.34    0.51
  -5  -4   6    3.04    0.65
  -5  -4   6    2.81    0.46
   4   4  -6   14.66    0.86
  -4  -4   6   13.09    0.71
  -4  -4   6   13.18    1.02
  -3  -4   6   40.90    1.19
  -3  -4   6   42.72    1.54
   2   4  -6    1.63    0.53
  -2  -4   6    1.80    0.56
   1   4  -6    0.64    0.50
  -1  -4   6    0.79    0.52
   0   4  -6    5.31    0.63
   0  -4   6    5.45    0.62
  -1   4  -6   -0.20    0.49
   1  -4   6   -0.01    0.50
  -2   4  -6    6.97    0.73
  -2   4  -6    7.68    0.57
   2  -4   6    6.80    0.69
  -3   4  -6    3.35    0.66
  -3   4  -6    3.37    0.47
  -4   4  -6  192.71    4.84
  -4   4  -6  190.95    5.00
  -5   4  -6  144.64    3.95
  -6   4  -6   10.71    1.00
  -6   4  -6   11.22    1.03
  -7   4  -6   -0.26    0.65
  -7   4  -6   -0.42    0.60
  -8   4  -6    1.39    0.80
  -8   4  -6   -0.05    0.69
  -9   4  -6   10.90    1.07
  -9   4  -6   10.72    1.17
 -10   4  -6   35.59    1.84
 -10   4  -6   34.11    2.02
 -11   4  -6   27.59    1.70
 -11   4  -6   31.85    2.08
 -12   4  -6    8.91    1.39
 -13   4  -6    7.42    1.47
 -14   4  -6    0.92    1.40
 -14  -3   6   -0.37    1.20
 -14  -3   6   -0.61    1.28
 -13  -3   6    3.24    1.21
 -12  -3   6   14.08    1.41
 -11  -3   6   10.11    1.23
 -10  -3   6    3.79    0.98
 -10  -3   6    5.21    1.17
  -9  -3   6   91.04    3.00
  -9  -3   6   86.67    2.87
  -8  -3   6   31.93    1.52
  -8  -3   6   30.48    1.70
  -7  -3   6    5.21    0.85
  -7  -3   6    6.36    0.71
   6   3  -6    2.81    0.42
  -6  -3   6    2.55    0.68
  -6  -3   6    2.90    0.54
   5   3  -6    0.45    0.40
  -5  -3   6    0.59    0.41
  -5  -3   6    1.11    0.60
   4   3  -6   12.96    0.78
  -4  -3   6   10.40    0.72
  -4  -3   6   15.40    1.01
   3   3  -6   37.64    1.34
  -3  -3   6   36.91    1.41
  -3  -3   6   36.41    1.12
   2   3  -6    3.83    0.52
  -2  -3   6    4.25    0.57
   1   3  -6   45.07    1.50
  -1  -3   6   45.46    1.49
   0   3  -6   14.40    0.84
   0  -3   6   13.45    0.85
  -1   3  -6   18.73    0.95
  -1   3  -6   17.28    0.62
   1  -3   6   18.31    0.94
  -2   3  -6    8.53    0.56
  -2   3  -6    8.94    0.84
  -3   3  -6   55.00    1.63
  -3   3  -6   55.17    1.83
  -4   3  -6   59.81    1.83
  -4   3  -6   58.34    1.95
  -5   3  -6   25.70    1.24
  -5   3  -6   25.59    1.22
  -6   3  -6   27.51    1.30
  -6   3  -6   28.27    1.31
  -7   3  -6    4.25    0.70
  -7   3  -6    5.61    0.74
  -8   3  -6   -0.66    0.69
  -8   3  -6   -0.18    0.60
  -9   3  -6   19.88    1.58
  -9   3  -6   19.90    1.38
 -10   3  -6    4.80    1.09
 -10   3  -6    4.04    0.86
 -11   3  -6  112.87    3.76
 -11   3  -6  108.12    3.36
 -12   3  -6   -0.51    1.10
 -13   3  -6    1.07    1.25
 -14   3  -6   14.92    1.78
 -14  -2   6   -0.28    1.21
 -13  -2   6   10.34    1.42
 -12  -2   6    0.56    1.03
 -11  -2   6    4.48    1.06
 -10  -2   6   82.97    2.86
  -9  -2   6   14.22    1.14
  -8  -2   6   11.11    1.09
  -8  -2   6   12.59    1.14
  -7  -2   6    7.66    0.74
  -7  -2   6    7.15    0.91
  -6  -2   6    2.58    0.54
  -6  -2   6    2.77    0.68
   5   2  -6    7.79    0.61
  -5  -2   6    7.97    0.77
  -5  -2   6    6.45    0.74
   4   2  -6    9.24    0.68
  -4  -2   6    9.01    0.78
  -4  -2   6    8.09    0.57
   3   2  -6  192.62    4.72
  -3  -2   6  193.05    4.66
  -3  -2   6  184.82    4.65
  -2  -2   6   12.98    0.80
  -2  -2   6   11.69    0.51
   1   2  -6   15.34    0.77
  -1  -2   6   14.93    0.83
   0   2  -6   56.08    1.67
   0  -2   6   54.64    1.61
  -1   2  -6   27.89    1.07
   1  -2   6   27.03    1.05
  -2   2  -6    0.61    0.41
  -2   2  -6    0.74    0.29
  -3   2  -6   75.63    2.18
  -3   2  -6   72.17    2.03
  -4   2  -6   59.46    1.89
  -5   2  -6   66.14    2.01
  -5   2  -6   64.26    2.04
  -6   2  -6    2.78    0.58
  -6   2  -6    3.65    0.61
  -7   2  -6   10.97    1.06
  -7   2  -6   11.19    0.98
  -8   2  -6    3.27    0.66
  -8   2  -6    3.59    0.77
  -9   2  -6   -0.15    0.79
  -9   2  -6   -0.75    0.59
 -10   2  -6   14.54    1.33
 -10   2  -6   13.84    1.26
 -11   2  -6   -1.69    0.77
 -11   2  -6    0.17    1.04
 -12   2  -6   10.14    1.39
 -13   2  -6    5.35    1.35
 -14   2  -6    7.53    1.52
 -14  -1   6    1.31    1.24
 -13  -1   6   17.70    1.62
 -12  -1   6    2.99    1.08
 -11  -1   6   83.80    3.01
 -10  -1   6   23.05    1.65
  -9  -1   6    7.68    0.92
  -8  -1   6    7.90    0.84
  -7  -1   6    1.04    0.68
  -7  -1   6    0.72    0.55
  -6  -1   6   -0.05    0.58
  -6  -1   6    0.03    0.47
   5   1  -6   22.56    0.86
  -5  -1   6   24.69    1.20
  -5  -1   6   25.17    1.08
   4   1  -6   17.34    0.77
  -4  -1   6   14.56    0.85
  -4  -1   6   16.86    1.02
   3   1  -6  110.19    2.84
  -3  -1   6  111.85    2.87
  -3  -1   6  109.56    2.82
  -2  -1   6    8.72    0.66
  -2  -1   6    7.25    0.46
   1   1  -6    6.06    0.57
  -1  -1   6    5.48    0.37
  -1  -1   6    5.62    0.51
   0   1  -6   48.15    1.47
   0  -1   6   47.42    1.42
  -1   1  -6    0.37    0.35
   1  -1   6    1.04    0.38
  -2   1  -6   56.59    1.71
  -3   1  -6   40.34    1.38
  -4   1  -6    9.49    0.77
  -4   1  -6    9.08    0.81
  -5   1  -6   64.50    2.01
  -5   1  -6   65.52    2.02
  -6   1  -6    2.58    0.57
  -6   1  -6    3.64    0.58
  -7   1  -6   86.74    2.53
  -7   1  -6   84.85    2.63
  -8   1  -6    2.62    0.72
  -8   1  -6    2.47    0.59
  -9   1  -6   17.64    1.18
  -9   1  -6   17.26    1.47
 -10   1  -6   20.47    1.66
 -10   1  -6   17.94    1.29
 -11   1  -6    4.02    1.10
 -12   1  -6    0.95    1.09
 -13   1  -6    0.06    1.20
 -14   1  -6    4.34    1.44
 -14   0   6   15.00    1.71
 -13   0   6   27.44    2.08
 -12   0   6   13.38    1.41
 -11   0   6   36.29    2.05
 -10   0   6    5.71    0.98
  -9   0   6    2.16    0.78
  -8   0   6    2.48    0.68
  -7   0   6   -0.13    0.52
  -6   0   6   -0.28    0.46
  -6   0   6   -0.45    0.57
   5   0  -6  100.07    2.59
  -5   0   6  105.80    2.82
  -5   0   6  104.83    2.85
   4   0  -6    2.98    0.37
  -4   0   6    2.28    0.54
  -4   0   6    2.69    0.46
   3   0  -6   18.75    0.76
  -3   0   6   19.06    0.88
  -3   0   6   18.98    0.78
  -2   0   6  101.16    2.52
  -2   0   6   96.77    2.51
   1   0  -6   79.72    2.13
  -1   0   6   78.73    2.02
  -1   0   6   78.54    2.08
   0   0  -6    3.09    0.42
   0   0   6    3.10    0.42
  -1   0  -6  208.60    5.09
   1   0   6  202.76    4.84
  -2   0  -6   -0.01    0.33
  -3   0  -6   -0.08    0.34
  -4   0  -6   18.43    0.94
  -4   0  -6   16.53    0.90
  -5   0  -6   16.73    0.97
  -5   0  -6   15.97    0.98
  -6   0  -6   43.68    1.53
  -6   0  -6   43.78    1.60
  -7   0  -6   82.82    2.45
  -7   0  -6   83.82    2.57
  -8   0  -6    0.06    0.61
  -9   0  -6   11.68    1.01
  -9   0  -6    9.35    1.01
 -10   0  -6    1.29    0.88
 -10   0  -6    1.23    0.67
 -11   0  -6    1.41    1.00
 -12   0  -6    1.92    1.10
 -13   0  -6    7.09    1.41
 -14   0  -6   11.49    1.62
 -14   1   6    3.26    1.34
 -13   1   6    0.45    1.12
 -12   1   6   32.14    2.12
 -11   1   6   26.74    1.84
 -10   1   6    4.77    0.99
  -9   1   6   12.25    1.07
  -7   1   6   18.68    1.16
  -6   1   6    2.22    0.66
  -5   1   6   15.59    1.02
  -5   1   6   14.73    0.96
   4  -1  -6   10.77    0.61
  -4   1   6   11.03    0.76
  -4   1   6   11.15    0.83
   3  -1  -6  120.31    2.98
  -3   1   6  117.15    3.03
  -3   1   6  115.65    2.94
  -2   1   6   25.99    0.91
  -2   1   6   24.50    0.86
   1  -1  -6  276.82    6.65
  -1   1   6  276.17    6.60
  -1   1   6  272.05    6.34
   0  -1  -6  102.55    2.69
   0   1   6  103.93    2.55
   0   1   6  100.33    2.58
  -1  -1  -6  146.30    3.71
  -2  -1  -6  244.75    6.00
  -3  -1  -6  102.64    2.73
  -4  -1  -6    1.94    0.45
  -4  -1  -6    1.29    0.43
  -5  -1  -6   11.27    0.90
  -5  -1  -6   11.36    0.87
  -6  -1  -6    7.97    0.72
  -6  -1  -6   10.19    0.82
  -7  -1  -6   16.57    1.12
  -7  -1  -6   15.72    0.94
  -8  -1  -6    0.60    0.47
  -8  -1  -6   -0.56    0.57
  -9  -1  -6    3.39    0.79
  -9  -1  -6    3.17    0.65
 -10  -1  -6    2.85    0.92
 -10  -1  -6    2.02    0.63
 -11  -1  -6   -1.30    0.90
 -12  -1  -6   -0.13    1.01
 -13  -1  -6    3.69    1.24
 -14  -1  -6    0.54    1.27
 -15  -1  -6    2.51    1.44
 -14   2   6    8.93    1.51
 -13   2   6    2.83    1.24
 -12   2   6    0.93    1.05
 -11   2   6    1.72    0.98
 -10   2   6    7.56    1.06
  -8   2   6    7.53    0.87
  -7   2   6   18.97    1.15
   5  -2  -6   57.07    1.56
  -5   2   6   54.95    1.75
  -5   2   6   55.25    1.80
   4  -2  -6   21.67    0.84
  -4   2   6   20.84    0.94
  -4   2   6   18.58    0.93
   3  -2  -6    0.28    0.30
  -3   2   6    0.23    0.32
  -3   2   6    0.53    0.33
  -2   2   6   15.19    0.68
   1  -2  -6  522.37   12.46
  -1   2   6  524.71   12.49
  -1   2   6  531.95   11.90
   0  -2  -6  455.22   10.70
   0   2   6  451.96   10.69
   0   2   6  440.54   10.16
  -1  -2  -6  147.08    3.74
  -2  -2  -6    1.68    0.40
  -3  -2  -6   15.98    0.82
  -4  -2  -6   17.07    0.87
  -5  -2  -6   -0.39    0.44
  -5  -2  -6    0.56    0.51
  -6  -2  -6    2.49    0.57
  -6  -2  -6    2.67    0.54
  -7  -2  -6   32.47    1.27
  -7  -2  -6   30.93    1.39
  -8  -2  -6   21.34    1.09
  -8  -2  -6   21.24    1.31
  -9  -2  -6  103.48    2.89
  -9  -2  -6  100.52    3.19
 -10  -2  -6   -0.09    0.60
 -10  -2  -6    1.68    0.85
 -11  -2  -6    9.10    1.19
 -12  -2  -6    8.14    1.26
 -13  -2  -6   -0.70    1.10
 -14  -2  -6    3.65    1.33
 -15  -2  -6    0.56    1.41
 -14   3   6   11.26    1.59
 -13   3   6    3.13    1.27
 -12   3   6    3.22    1.10
 -11   3   6   12.29    1.29
 -10   3   6   10.94    1.20
  -9   3   6    1.13    0.75
  -8   3   6   25.66    1.41
  -7   3   6   18.60    1.15
  -6   3   6   14.37    1.04
   5  -3  -6   41.24    1.27
  -5   3   6   39.89    1.49
   4  -3  -6   81.21    2.15
  -4   3   6   78.12    2.26
   3  -3  -6  136.42    3.41
  -3   3   6  133.95    3.26
  -3   3   6  134.36    3.47
  -2   3   6    0.83    0.30
  -2   3   6    0.57    0.29
   1  -3  -6  320.18    7.66
  -1   3   6  315.63    7.66
   0  -3  -6   58.22    1.72
   0   3   6   57.66    1.63
  -1  -3  -6    0.15    0.39
  -2  -3  -6   41.78    1.37
  -3  -3  -6    1.24    0.40
  -4  -3  -6    2.51    0.47
  -5  -3  -6   47.92    1.63
  -5  -3  -6   47.03    1.58
  -6  -3  -6   64.23    2.06
  -6  -3  -6   65.44    1.96
  -7  -3  -6    6.19    0.61
  -7  -3  -6    7.25    0.75
  -8  -3  -6    9.42    0.73
  -8  -3  -6    7.10    0.80
  -9  -3  -6    4.93    0.84
  -9  -3  -6    5.74    0.67
 -10  -3  -6   50.63    2.13
 -10  -3  -6   45.44    1.71
 -11  -3  -6   10.16    1.19
 -12  -3  -6    1.10    1.03
 -13  -3  -6    5.89    1.24
 -14  -3  -6    5.78    1.39
 -15  -3  -6    6.68    1.58
 -14   4   6   -2.29    1.20
 -13   4   6   14.73    1.59
 -12   4   6   24.95    2.06
 -11   4   6    0.27    0.93
 -10   4   6    7.42    1.06
  -9   4   6   -0.29    0.69
  -8   4   6    4.67    0.74
  -7   4   6    0.05    0.55
   6  -4  -6    1.93    0.40
  -6   4   6    0.98    0.53
   5  -4  -6   -0.33    0.40
  -5   4   6   -0.34    0.47
   4  -4  -6   61.57    1.75
  -4   4   6   60.73    1.68
  -4   4   6   59.28    1.87
   3  -4  -6   69.79    1.92
  -3   4   6   66.14    1.76
  -3   4   6   69.70    1.98
  -2   4   6   39.14    1.25
   1  -4  -6  364.96    8.69
  -1   4   6  358.30    8.70
   0  -4  -6    7.16    0.68
   0   4   6    7.04    0.61
  -1  -4  -6   28.37    1.09
  -2  -4  -6  192.09    4.81
  -3  -4  -6   96.30    2.63
  -4  -4  -6    2.80    0.49
  -5  -4  -6   16.03    0.96
  -6  -4  -6    2.19    0.50
  -6  -4  -6    2.31    0.56
  -7  -4  -6    1.86    0.51
  -7  -4  -6    1.56    0.56
  -8  -4  -6    5.83    0.63
  -8  -4  -6    5.65    0.73
  -9  -4  -6    2.58    0.74
  -9  -4  -6    2.06    0.58
 -10  -4  -6   21.78    1.21
 -10  -4  -6   23.17    1.63
 -11  -4  -6    4.87    1.04
 -12  -4  -6    1.02    1.03
 -13  -4  -6    5.53    1.24
 -14  -4  -6   -0.24    1.23
 -14   5   6    1.78    1.32
 -13   5   6    2.40    1.28
 -12   5   6   22.22    1.96
 -11   5   6   -0.27    0.92
 -10   5   6   -0.38    0.84
  -9   5   6    8.54    0.99
  -8   5   6    3.64    0.75
   7  -5  -6    1.28    0.41
  -7   5   6    1.51    0.60
   6  -5  -6   19.02    0.90
  -6   5   6   21.14    1.16
   5  -5  -6    5.60    0.55
   4  -5  -6   51.10    1.60
  -4   5   6   51.35    1.69
  -3   5   6    7.74    0.70
   2  -5  -6   43.31    1.40
  -2   5   6   44.04    1.38
   1  -5  -6  178.09    4.48
  -1   5   6  178.75    4.46
   0  -5  -6    2.33    0.44
   0   5   6    1.98    0.37
  -1  -5  -6    9.05    0.74
  -2  -5  -6   49.12    1.57
  -3  -5  -6   31.35    1.21
  -4  -5  -6   12.01    0.88
  -5  -5  -6    1.66    0.52
  -6  -5  -6   36.63    1.51
  -6  -5  -6   38.96    1.42
  -7  -5  -6    4.12    0.58
  -7  -5  -6    3.83    0.67
  -8  -5  -6   63.59    2.00
  -8  -5  -6   63.52    2.23
  -9  -5  -6   10.67    1.01
  -9  -5  -6   12.98    0.98
 -10  -5  -6   17.24    1.59
 -10  -5  -6   18.83    1.15
 -11  -5  -6    1.99    0.94
 -12  -5  -6    4.82    1.14
 -13  -5  -6    0.22    1.08
 -14  -5  -6   -0.89    1.14
 -14   6   6    0.86    1.33
 -13   6   6    1.98    1.21
 -12   6   6    3.42    1.16
 -11   6   6    0.72    0.96
 -10   6   6    1.48    0.91
  -9   6   6    2.86    0.88
  -8   6   6   -0.05    0.62
  -7   6   6    2.84    0.64
  -7   6   6    2.09    0.39
  -6   6   6   99.61    2.95
  -6   6   6  101.23    2.67
  -5   6   6   23.32    1.15
  -5   6   6   23.38    0.97
  -4   6   6    0.43    0.38
  -4   6   6   -0.36    0.45
  -3   6   6   12.46    0.76
  -3   6   6   13.39    0.82
  -2   6   6  117.95    3.12
  -2   6   6  117.77    3.08
  -1   6   6   39.80    1.29
  -1   6   6   40.00    1.29
   0   6   6   81.74    2.25
   0   6   6   82.49    2.27
  -1  -6  -6    4.06    0.53
  -2  -6  -6   17.47    0.94
  -3  -6  -6   97.31    2.72
  -4  -6  -6   13.61    0.98
  -5  -6  -6   68.48    2.12
  -6  -6  -6    3.65    0.59
  -7  -6  -6   39.83    1.66
  -7  -6  -6   43.88    1.54
  -8  -6  -6    8.49    0.86
  -8  -6  -6    8.06    0.75
  -9  -6  -6   42.40    1.89
  -9  -6  -6   43.31    1.63
 -10  -6  -6   28.58    1.74
 -10  -6  -6   25.55    1.31
 -11  -6  -6    1.75    0.95
 -12  -6  -6   -0.55    0.99
 -13  -6  -6   -1.43    1.09
 -14  -6  -6    1.52    1.26
 -14   7   6    7.12    1.53
 -13   7   6   39.99    2.44
 -12   7   6    6.58    1.30
 -11   7   6    0.43    0.97
 -10   7   6    3.56    0.99
  -9   7   6    2.01    0.85
  -8   7   6    7.36    0.88
  -8   7   6    6.04    0.59
  -7   7   6   48.73    1.58
  -7   7   6   49.82    1.91
  -6   7   6   26.79    1.31
  -6   7   6   27.16    1.10
  -5   7   6    0.23    0.51
  -5   7   6    1.08    0.42
  -4   7   6    4.55    0.54
  -4   7   6    3.75    0.60
  -3   7   6   29.37    1.17
  -3   7   6   29.57    1.24
  -2   7   6    9.81    0.75
  -2   7   6   10.74    0.78
  -1   7   6    1.49    0.42
   0   7   6   10.04    0.74
   0   7   6   11.04    0.79
   1   7   6   14.59    0.84
  -2  -7  -6    7.28    0.70
  -3  -7  -6   16.15    1.04
  -4  -7  -6  222.03    5.62
  -5  -7  -6   25.26    1.23
  -6  -7  -6   10.49    0.95
  -7  -7  -6    4.43    0.74
  -7  -7  -6    3.20    0.63
  -8  -7  -6   19.06    1.30
  -8  -7  -6   17.16    1.11
  -9  -7  -6    4.54    0.74
  -9  -7  -6    5.42    0.89
 -10  -7  -6   11.83    1.18
 -10  -7  -6   13.75    1.15
 -11  -7  -6    4.90    1.07
 -12  -7  -6   15.04    1.44
 -13  -7  -6    5.24    1.30
 -14  -7  -6   -0.05    1.22
 -14   8   6    0.99    1.34
 -13   8   6    0.78    1.22
 -12   8   6    0.30    1.08
 -11   8   6    5.57    1.17
 -10   8   6    8.77    1.20
  -9   8   6    0.54    0.85
  -9   8   6   -0.30    0.50
  -8   8   6   16.95    1.03
  -8   8   6   17.02    1.41
  -7   8   6   20.56    1.32
  -7   8   6   22.33    1.10
  -6   8   6   23.55    1.31
  -6   8   6   24.08    1.12
  -5   8   6   51.80    1.84
  -5   8   6   52.96    1.72
  -4   8   6   75.09    2.23
  -4   8   6   74.11    2.30
  -3   8   6  154.72    4.09
  -3   8   6  154.90    4.05
  -2   8   6  210.07    5.27
  -2   8   6  205.05    5.27
  -1   8   6    5.32    0.58
  -1   8   6    4.93    0.56
   0   8   6  118.04    3.20
   0   8   6  123.05    3.26
   1   8   6    1.22    0.46
   2   8   6   18.34    1.04
   3   8   6   18.21    1.07
  -4  -8  -6   10.24    0.86
  -5  -8  -6    2.76    0.64
  -6  -8  -6    1.62    0.65
  -7  -8  -6    3.95    0.70
  -8  -8  -6    1.68    0.72
  -8  -8  -6    1.73    0.68
  -9  -8  -6    0.51    0.65
  -9  -8  -6    2.14    0.84
 -10  -8  -6   -0.22    0.84
 -11  -8  -6    2.71    1.00
 -12  -8  -6    5.82    1.21
 -13  -8  -6    2.07    1.18
 -14  -8  -6    0.31    1.27
 -13   9   6    0.72    1.26
 -12   9   6    8.06    1.39
 -11   9   6    8.05    1.27
 -10   9   6   16.75    1.45
  -9   9   6    9.64    0.84
  -9   9   6   10.03    1.18
  -8   9   6    0.99    0.76
  -8   9   6    0.04    0.55
  -7   9   6    9.28    0.93
  -7   9   6    8.47    0.77
  -6   9   6   18.56    1.08
  -6   9   6   18.02    1.22
  -5   9   6    0.55    0.46
  -5   9   6    0.26    0.52
  -4   9   6   34.81    1.37
  -4   9   6   31.98    1.40
  -3   9   6  135.78    3.62
  -3   9   6  131.34    3.62
  -2   9   6  109.72    3.10
  -2   9   6  111.40    3.07
  -1   9   6   92.99    2.70
  -1   9   6   92.27    2.63
   0   9   6   30.85    1.36
   0   9   6   31.79    1.27
   1   9   6    0.19    0.51
   2   9   6    8.50    0.76
   3   9   6    0.58    0.53
   4   9   6    8.10    0.76
  -5  -9  -6   16.07    1.16
  -6  -9  -6   72.18    2.32
  -7  -9  -6    4.58    0.77
  -8  -9  -6   41.68    1.73
  -8  -9  -6   43.09    1.89
  -9  -9  -6   14.83    1.26
  -9  -9  -6   14.78    1.24
 -10  -9  -6    1.51    0.91
 -11  -9  -6    0.46    0.98
 -12  -9  -6    0.98    1.06
 -13  -9  -6    3.81    1.27
 -14  -9  -6    1.71    1.34
 -13  10   6    7.20    1.51
 -12  10   6   -1.38    1.12
 -11  10   6    1.42    1.10
 -10  10   6    1.05    0.99
  -9  10   6    0.60    0.65
  -9  10   6    1.04    0.88
  -8  10   6    6.09    0.80
  -8  10   6    5.58    0.97
  -7  10   6    2.72    0.66
  -7  10   6    3.50    0.80
  -6  10   6   11.62    0.97
  -6  10   6   13.53    1.07
  -5  10   6    9.86    0.87
  -5  10   6   10.59    1.00
  -4  10   6   13.68    1.07
  -4  10   6   19.39    1.14
  -3  10   6   47.27    1.70
  -3  10   6   45.75    1.68
  -2  10   6   35.22    1.39
  -2  10   6   34.70    1.45
  -1  10   6   87.44    2.66
  -1  10   6   91.92    2.61
   0  10   6   17.64    1.12
   1  10   6    0.77    0.53
   2  10   6  185.18    4.86
   3  10   6   76.21    2.39
   4  10   6    7.11    0.76
   5  10   6    3.52    0.68
  -6 -10  -6    4.95    0.84
  -7 -10  -6    1.64    0.75
  -8 -10  -6    0.00    0.76
  -8 -10  -6    0.71    0.81
  -9 -10  -6   13.43    1.21
  -9 -10  -6   14.93    1.32
 -10 -10  -6    3.55    1.00
 -11 -10  -6    2.69    1.05
 -12 -10  -6   12.26    1.43
 -13 -10  -6    0.88    1.17
 -13  11   6    5.93    1.49
 -12  11   6    8.63    1.41
 -11  11   6    5.84    1.24
 -10  11   6    1.54    1.04
  -9  11   6    6.37    0.87
  -8  11   6   12.85    1.20
  -8  11   6   10.49    1.01
  -7  11   6   60.11    2.16
  -7  11   6   56.84    2.27
  -6  11   6    2.58    0.76
  -6  11   6    3.43    0.73
  -5  11   6    1.19    0.63
  -5  11   6    1.30    0.63
  -4  11   6   57.42    2.04
  -4  11   6   60.35    2.07
  -3  11   6   34.17    1.47
  -3  11   6   38.26    1.58
  -2  11   6   -0.33    0.50
  -2  11   6    0.17    0.47
  -1  11   6   43.31    1.57
  -1  11   6   43.63    1.69
   0  11   6   98.47    2.83
   0  11   6   99.72    2.93
   1  11   6   21.51    1.23
   2  11   6  123.34    3.49
   3  11   6    8.84    0.84
   4  11   6   38.41    1.63
   5  11   6   13.61    1.16
  -6 -11  -6   34.77    1.67
  -7 -11  -6    1.93    0.83
  -8 -11  -6    0.91    0.87
  -8 -11  -6    2.21    0.86
  -9 -11  -6   10.85    1.17
  -9 -11  -6   11.10    1.09
 -10 -11  -6    1.15    0.96
 -11 -11  -6    0.88    1.05
 -12 -11  -6    3.68    1.21
 -13 -11  -6    9.54    1.48
 -12  12   6    2.03    1.26
 -11  12   6    1.70    1.15
 -10  12   6    0.86    1.01
  -9  12   6    7.18    1.18
  -9  12   6    6.62    0.95
  -8  12   6   -0.87    0.86
  -8  12   6   -0.48    0.71
  -7  12   6   40.45    1.97
  -7  12   6   38.51    1.85
  -6  12   6    0.79    0.73
  -6  12   6    2.52    0.81
  -5  12   6   39.99    1.76
  -5  12   6   40.59    1.78
  -4  12   6   13.15    1.21
  -4  12   6   14.34    1.15
  -3  12   6    2.84    0.69
  -3  12   6    3.02    0.63
  -2  12   6    1.15    0.60
  -2  12   6    0.63    0.52
  -1  12   6   22.98    1.19
  -1  12   6   20.68    1.28
   0  12   6   14.11    1.13
   0  12   6   18.15    1.09
   1  12   6   17.55    1.20
   2  12   6   65.69    2.24
   3  12   6   37.16    1.66
   4  12   6   31.23    1.52
   5  12   6    9.53    0.98
   6  12   6   55.60    2.13
  -7 -12  -6    6.45    1.04
  -8 -12  -6   -0.05    0.93
  -8 -12  -6    1.12    0.89
  -9 -12  -6   -0.41    0.90
  -9 -12  -6    0.14    0.85
 -10 -12  -6    4.79    1.09
 -11 -12  -6   12.84    1.41
 -12 -12  -6    0.86    1.15
 -13 -12  -6    0.13    1.21
 -12  13   6    2.78    1.34
 -11  13   6    2.97    1.23
 -10  13   6    0.36    1.11
  -9  13   6   12.92    1.39
  -9  13   6   11.26    1.17
  -8  13   6    1.47    0.85
  -8  13   6    3.29    1.01
  -7  13   6    7.74    1.10
  -7  13   6    7.47    1.02
  -6  13   6    5.38    0.94
  -6  13   6    5.42    0.96
  -5  13   6    2.03    0.79
  -5  13   6    1.88    0.76
  -4  13   6   16.91    1.29
  -4  13   6   16.92    1.37
  -3  13   6   -0.79    0.56
  -3  13   6   -0.30    0.64
  -2  13   6    2.26    0.63
  -2  13   6    2.40    0.70
  -1  13   6    2.86    0.64
  -1  13   6    2.20    0.70
   0  13   6   24.48    1.43
   0  13   6   26.19    1.30
   1  13   6    2.36    0.68
   2  13   6   53.51    2.04
   3  13   6   14.73    1.32
   4  13   6   47.77    1.99
   5  13   6    0.34    0.81
   6  13   6    0.77    0.82
  -8 -13  -6    2.30    0.97
  -8 -13  -6    1.07    1.01
  -9 -13  -6   -0.26    0.92
  -9 -13  -6    0.32    0.88
 -10 -13  -6    2.01    1.04
 -11 -13  -6    2.60    1.14
 -12 -13  -6    0.28    1.14
 -12  14   6   -0.36    1.27
 -11  14   6    0.21    1.20
 -10  14   6    6.20    1.28
  -9  14   6   15.18    1.47
  -9  14   6   15.63    1.39
  -8  14   6    0.07    0.89
  -8  14   6   -0.22    0.96
  -7  14   6    1.82    0.92
  -7  14   6    1.64    0.95
  -6  14   6   -0.59    0.81
  -6  14   6    0.29    0.85
  -5  14   6   -0.31    0.78
  -4  14   6    2.36    0.77
  -4  14   6    2.64    0.85
  -3  14   6   45.72    1.89
  -3  14   6   45.79    1.98
  -2  14   6    3.95    0.75
  -2  14   6    3.88    0.85
  -1  14   6    2.54    0.79
  -1  14   6    1.57    0.65
   0  14   6    9.64    1.02
   0  14   6    9.44    0.88
   1  14   6   32.29    1.66
   2  14   6    9.05    1.01
   3  14   6   95.44    3.08
   4  14   6   44.24    2.04
   5  14   6    1.68    0.91
   6  14   6    2.31    0.96
   7  14   6    0.07    0.87
  -8 -14  -6   -0.50    1.02
  -9 -14  -6    0.89    1.04
  -9 -14  -6   -0.81    0.91
 -10 -14  -6    7.65    1.20
 -11 -14  -6    0.28    1.07
 -12 -14  -6    4.27    1.28
 -11  15   6   -0.84    1.18
 -10  15   6    4.13    1.24
  -9  15   6    0.38    1.06
  -9  15   6   -1.44    0.94
  -8  15   6    6.53    1.18
  -8  15   6    5.98    1.14
  -7  15   6    0.33    0.95
  -7  15   6   -1.49    0.87
  -6  15   6    1.06    0.90
  -6  15   6    1.39    0.94
  -5  15   6    1.14    0.86
  -5  15   6   -0.97    0.85
  -4  15   6   54.27    2.18
  -4  15   6   53.37    2.29
  -3  15   6    3.37    0.85
  -3  15   6    2.17    0.89
  -2  15   6   57.68    2.10
  -2  15   6   51.72    2.26
  -1  15   6   38.67    1.71
  -1  15   6   37.79    1.91
   0  15   6   39.89    1.99
   0  15   6   39.71    1.73
   1  15   6   11.20    1.14
   2  15   6   11.26    1.14
   3  15   6   56.86    2.38
   4  15   6    2.75    0.99
   5  15   6    0.09    0.94
   6  15   6   -0.11    0.96
   7  15   6   13.44    1.27
  -9 -15  -6    3.70    1.04
  -9 -15  -6    1.36    1.10
 -10 -15  -6    0.34    1.01
 -11 -15  -6   11.05    1.41
 -11  16   6   -0.06    1.28
 -10  16   6    3.77    1.27
  -9  16   6    9.92    1.36
  -9  16   6    6.13    1.25
  -8  16   6   -1.41    1.00
  -8  16   6   -1.26    0.96
  -7  16   6   15.28    1.45
  -7  16   6   17.80    1.69
  -6  16   6    0.72    0.96
  -6  16   6    0.74    0.99
  -5  16   6   -0.29    0.84
  -5  16   6    0.86    0.98
  -4  16   6    0.64    0.91
  -4  16   6   -0.29    0.84
  -3  16   6    2.08    0.84
  -3  16   6    0.25    0.92
  -2  16   6   33.71    1.98
  -2  16   6   30.11    1.66
  -1  16   6    1.38    0.79
  -1  16   6    2.41    0.96
   0  16   6    2.54    0.97
   0  16   6    2.83    0.81
   1  16   6    1.33    0.91
   2  16   6    1.34    0.95
   3  16   6   32.69    1.92
  -4 -16  -6    2.28    1.06
   4  16   6    5.61    1.13
   5  16   6    9.45    1.25
   6  16   6    0.81    1.05
   7  16   6    1.20    1.06
  -9 -16  -6   -1.07    1.11
  -9 -16  -6   -0.16    0.97
 -10 -16  -6    2.16    1.10
 -11 -16  -6    0.22    1.13
 -10  17   6   -0.21    1.17
  -9  17   6   -1.48    1.07
  -9  17   6   -1.47    1.12
  -8  17   6   -1.07    1.06
  -8  17   6   -0.54    1.05
  -7  17   6    0.62    1.07
  -7  17   6    0.32    1.04
  -6  17   6    5.61    1.13
  -6  17   6    4.34    1.15
  -5  17   6   -0.79    0.98
  -5  17   6   -0.94    0.88
  -4  17   6    7.91    1.07
  -4  17   6    9.66    1.28
  -3  17   6    5.00    0.97
  -3  17   6    5.09    1.15
  -2  17   6   11.60    1.12
  -2  17   6   12.23    1.37
  -1  17   6    5.46    1.16
  -1  17   6    6.53    0.98
   0  17   6    0.46    0.97
   1  17   6    0.63    0.98
   2  17   6   10.46    1.31
   3  17   6   10.64    1.33
  -4 -17  -6    4.86    1.03
   4  17   6    3.33    1.15
  -5 -17  -6    3.06    1.11
   5  17   6    2.58    1.15
   6  17   6    5.33    1.20
   7  17   6   -1.72    1.04
   8  17   6    1.79    1.15
  -9 -17  -6    6.55    1.15
 -10 -17  -6    0.69    1.09
  -9  18   6   -0.86    1.21
  -9  18   6    1.16    1.21
  -8  18   6   -0.71    1.10
  -8  18   6   -1.23    1.08
  -7  18   6    0.21    1.18
  -7  18   6    2.25    1.12
  -6  18   6    1.72    1.18
  -6  18   6   -0.31    0.98
  -5  18   6    6.64    1.10
  -5  18   6    4.38    1.21
  -4  18   6   23.12    1.93
  -4  18   6   25.51    1.79
  -3  18   6    0.43    1.06
  -3  18   6   -0.70    0.85
  -2  18   6    8.82    1.31
  -2  18   6   10.89    1.16
  -1  18   6   12.51    1.45
   0  18   6    0.21    1.02
   1  18   6    9.09    1.36
   2  18   6   77.21    3.01
   3  18   6    2.95    1.17
  -4 -18  -6    3.61    1.14
   4  18   6    2.80    1.22
  -5 -18  -6   32.88    1.96
   5  18   6   32.44    2.17
  -6 -18  -6    1.98    1.14
   6  18   6    0.46    1.14
  -7 -18  -6    6.70    1.38
   7  18   6    5.53    1.33
   8  18   6   -0.98    1.14
  -9 -18  -6   -0.61    0.99
  -8  19   6    1.89    1.36
  -8  19   6    5.44    1.36
  -7  19   6   12.80    1.63
  -7  19   6   10.73    1.45
  -6  19   6    2.17    1.10
  -6  19   6   -1.32    1.17
  -5  19   6   -1.13    1.12
  -5  19   6   -0.52    0.97
  -4  19   6   -0.74    1.11
  -4  19   6    0.22    0.93
  -3  19   6   -0.09    0.91
  -3  19   6    0.04    1.13
  -2  19   6   -0.26    1.12
  -1  19   6    2.17    1.18
   0  19   6    6.00    1.30
   1  19   6    0.09    1.12
   2  19   6    8.03    1.39
   3  19   6    1.72    1.24
   4  19   6    4.19    1.31
   5  19   6    1.41    1.22
  -6 -19  -6    2.60    1.22
   6  19   6    2.43    1.29
  -7 -19  -6    4.51    1.36
   7  19   6   -0.87    1.23
  -8 -19  -6    1.65    1.40
   8  19   6    1.68    1.28
  -7  20   6   -1.44    1.35
  -7  20   6   -0.07    1.14
  -6  20   6    2.72    1.17
  -6  20   6    0.77    1.29
  -5  20   6   -0.09    1.29
  -5  20   6   -1.30    1.03
  -4  20   6   -0.89    1.18
  -4  20   6   -0.42    0.95
  -3  20   6    4.33    1.34
  -2  20   6    0.19    1.19
  -1  20   6    0.08    1.19
   0  20   6   -0.90    1.15
   1  20   6   13.30    1.59
   2  20   6    1.06    1.28
   3  20   6    1.80    1.29
   4  20   6   -0.41    1.24
   5  20   6    0.23    1.28
   6  20   6    0.81    1.29
   7  20   6   -1.60    1.29
  -6  21   6   -1.60    1.13
  -6  21   6   -2.06    1.37
  -5  21   6   -1.41    1.05
  -5  21   6   -1.50    1.29
  -4  21   6    2.72    1.42
  -3  21   6    1.64    1.37
  -2  21   6   -1.26    1.25
  -1  21   6    1.29    1.29
   0  21   6    4.57    1.46
   1  21   6   16.39    1.77
   2  21   6    1.92    1.37
   3  21   6   -1.19    1.33
   4  21   6    0.27    1.37
   5  21   6    2.43    1.44
   6  21   6    0.01    1.35
  -4  22   6   -0.53    1.41
  -3  22   6    1.43    1.44
  -2  22   6    0.85    1.39
  -1  22   6   -1.59    1.36
   0  22   6    3.62    1.51
   1  22   6   -0.74    1.37
   2  22   6    0.64    1.48
   3  22   6    0.74    1.44
   4  22   6   -0.24    1.48
   3  17  -7   -1.60    1.36
   2  17  -7   -0.57    1.36
  -2 -17   7   -0.78    1.29
   1  17  -7   10.93    1.70
  -1 -17   7   10.41    1.53
   0  17  -7   10.28    1.68
   0 -17   7    5.34    1.40
  -1  17  -7   -0.89    1.39
   1 -17   7   -1.06    1.26
  -2  17  -7   -1.55    1.40
  -3  17  -7    1.33    1.46
  -4  17  -7    0.64    1.46
   5  16  -7    0.53    1.35
  -5 -16   7    0.11    1.43
   4  16  -7    0.78    1.33
  -4 -16   7    0.30    1.33
   3  16  -7    5.73    1.46
  -3 -16   7    3.21    1.37
   2  16  -7    2.25    1.39
  -2 -16   7    3.84    1.29
   1  16  -7    0.75    1.32
  -1 -16   7   -0.90    1.18
   0  16  -7   -1.24    1.29
   0 -16   7   -1.91    1.18
  -1  16  -7    4.60    1.43
   1 -16   7    4.40    1.30
  -2  16  -7    2.00    1.40
  -3  16  -7    3.16    1.44
  -4  16  -7    1.60    1.39
  -5  16  -7    2.74    1.41
  -6  16  -7    0.99    1.47
   6  15  -7    3.85    1.43
  -6 -15   7    0.75    1.40
   5  15  -7    1.00    1.31
  -5 -15   7    2.86    1.40
   4  15  -7    5.68    1.42
  -4 -15   7    5.36    1.41
   3  15  -7    1.53    1.23
  -3 -15   7   -0.74    1.18
   2  15  -7    0.16    1.25
  -2 -15   7    0.94    1.22
   1  15  -7    0.08    1.20
  -1 -15   7    0.96    1.11
   0  15  -7    1.43    1.24
   0 -15   7   -0.46    1.10
  -1  15  -7   -0.40    1.25
   1 -15   7   -1.56    1.07
  -2  15  -7    3.83    1.35
   2 -15   7    3.09    1.20
  -3  15  -7    0.93    1.25
  -4  15  -7    3.86    1.35
  -5  15  -7    1.98    1.35
  -6  15  -7    3.09    1.42
  -7  15  -7   -0.10    1.36
  -8 -14   7   10.68    1.70
  -7 -14   7    1.00    1.35
   6  14  -7    3.48    1.36
  -6 -14   7   -0.56    1.27
   5  14  -7    6.85    1.39
  -5 -14   7    7.00    1.39
   4  14  -7    1.04    1.18
  -4 -14   7   -1.21    1.16
   3  14  -7   -1.39    1.14
  -3 -14   7   -0.66    1.09
   2  14  -7    1.48    1.16
  -2 -14   7    0.75    1.13
   1  14  -7    8.31    1.38
  -1 -14   7    7.56    1.22
   0  14  -7    0.05    1.18
   0 -14   7    0.15    1.08
  -1  14  -7   -1.11    1.16
   1 -14   7   -0.35    1.04
  -2  14  -7   -0.46    1.14
   2 -14   7   -0.72    1.03
  -3  14  -7    1.16    1.18
  -4  14  -7    1.58    1.17
  -5  14  -7    1.45    1.25
  -6  14  -7    0.16    1.25
  -7  14  -7   -0.31    1.27
  -8  14  -7   -1.80    1.32
  -8 -13   7    1.83    1.41
  -7 -13   7    0.17    1.26
  -6 -13   7    2.58    1.27
   5  13  -7    4.32    1.21
  -5 -13   7    4.17    1.27
   4  13  -7    0.12    1.13
  -4 -13   7   -0.02    1.11
   3  13  -7   -0.01    1.07
  -3 -13   7   -0.61    1.06
   2  13  -7   21.23    1.93
  -2 -13   7   20.96    1.82
   1  13  -7    2.09    1.12
  -1 -13   7   -1.28    1.00
   0  13  -7   33.96    2.14
   0 -13   7   38.68    2.03
  -1  13  -7    0.82    1.08
   1 -13   7   -1.88    0.97
  -2  13  -7   11.72    1.43
   2 -13   7   10.56    1.27
  -3  13  -7    3.45    1.17
  -4  13  -7   -0.86    1.09
  -5  13  -7   -1.60    1.09
  -6  13  -7   -1.04    1.14
  -7  13  -7    3.15    1.33
  -8  13  -7    3.53    1.38
  -9  13  -7    9.84    1.65
  -9 -12   7    2.24    1.41
  -8 -12   7   -0.64    1.24
   7  12  -7   -0.59    1.10
  -7 -12   7    1.74    1.25
  -6 -12   7    3.13    1.20
   5  12  -7    2.10    1.10
  -5 -12   7   -0.55    1.05
   4  12  -7    1.99    1.06
  -4 -12   7    1.46    1.06
   3  12  -7    7.36    1.27
  -3 -12   7    7.58    1.20
   2  12  -7    1.61    1.06
  -2 -12   7    1.27    1.01
   1  12  -7    6.16    1.17
  -1 -12   7    4.03    1.05
   0  12  -7    8.05    1.26
   0 -12   7    7.64    1.12
  -1  12  -7    7.10    1.24
   1 -12   7    8.41    1.16
  -2  12  -7   -0.22    0.98
   2 -12   7   -0.15    0.98
  -3  12  -7    0.53    1.03
  -4  12  -7    2.00    1.10
  -5  12  -7   24.47    1.96
  -6  12  -7    3.14    1.19
  -7  12  -7    6.21    1.36
  -8  12  -7   -2.11    1.13
  -9  12  -7    0.22    1.29
 -10  12  -7   13.94    1.71
 -10 -11   7    5.35    1.50
  -9 -11   7    0.90    1.27
  -8 -11   7    2.56    1.25
   7  11  -7    6.95    1.17
  -7 -11   7    6.51    1.30
  -6 -11   7   -0.36    1.06
   5  11  -7    1.66    0.98
  -5 -11   7    2.65    1.05
   4  11  -7    1.01    1.00
  -4 -11   7    3.72    1.08
   3  11  -7    0.56    0.96
  -3 -11   7   -0.62    0.91
   2  11  -7   17.03    1.63
  -2 -11   7   13.70    1.25
   1  11  -7    1.92    0.99
  -1 -11   7    0.64    0.91
   0  11  -7    9.51    1.22
   0 -11   7   14.97    1.23
  -1  11  -7    2.79    1.00
   1 -11   7    3.46    0.97
  -2  11  -7    0.31    0.92
   2 -11   7   -0.24    0.93
  -3  11  -7    0.97    0.94
  -4  11  -7    3.14    1.06
  -5  11  -7    0.55    1.01
  -6  11  -7    0.46    1.06
  -7  11  -7   -0.83    1.06
  -8  11  -7   -1.58    1.10
  -9  11  -7   -2.04    1.15
 -10  11  -7   -1.82    1.22
 -11  11  -7    2.01    1.39
 -11 -10   7   -0.02    1.35
 -10 -10   7    0.74    1.28
  -9 -10   7    2.82    1.24
  -8 -10   7    8.09    1.33
   7  10  -7    3.80    1.01
  -7 -10   7    4.08    1.15
   6  10  -7    2.40    0.96
  -6 -10   7    1.21    1.05
  -5 -10   7   -0.83    0.94
   4  10  -7    4.43    1.02
  -4 -10   7    3.63    1.02
   3  10  -7   -0.59    0.84
  -3 -10   7   -0.50    0.86
   2  10  -7   -1.03    0.84
  -2 -10   7    0.21    0.85
   1  10  -7   14.17    1.28
  -1 -10   7   21.44    1.50
   0  10  -7    0.14    0.87
   0 -10   7   -0.83    0.77
  -1  10  -7   11.27    1.15
   1 -10   7    7.50    1.02
  -2  10  -7    0.73    0.89
   2 -10   7   -0.68    0.83
  -3  10  -7    4.05    1.02
  -4  10  -7    3.37    1.02
  -5  10  -7    3.99    1.10
  -6  10  -7    8.06    1.25
  -6  10  -7    8.22    0.98
  -7  10  -7    1.69    1.09
  -7  10  -7    2.22    0.89
  -8  10  -7    6.07    1.07
  -8  10  -7    6.35    1.27
  -9  10  -7    2.51    1.18
 -10  10  -7    0.50    1.19
 -11  10  -7   -1.84    1.21
 -11  10  -7    0.04    1.17
 -11  -9   7    2.49    1.33
 -10  -9   7    3.26    1.28
  -9  -9   7    0.04    1.08
  -8  -9   7    5.53    1.24
   7   9  -7   10.52    1.12
  -7  -9   7    9.80    1.26
   6   9  -7   22.81    1.54
  -6  -9   7   20.01    1.71
  -5  -9   7    6.53    1.12
   4   9  -7    4.58    0.94
  -4  -9   7    2.44    0.90
   3   9  -7    4.39    0.92
  -3  -9   7    3.71    0.88
   2   9  -7    7.42    0.98
  -2  -9   7    6.74    0.92
   1   9  -7   -0.51    0.74
  -1  -9   7    0.18    0.72
   0   9  -7   -0.33    0.76
   0  -9   7    1.13    0.74
  -1   9  -7    6.33    0.96
   1  -9   7    5.47    0.89
  -2   9  -7    3.13    0.88
   2  -9   7    3.28    0.86
  -3   9  -7    1.58    0.83
  -4   9  -7    5.93    1.02
  -4   9  -7    5.08    0.66
  -5   9  -7    2.22    0.70
  -5   9  -7    2.57    0.96
  -6   9  -7    2.67    0.80
  -6   9  -7    3.37    1.07
  -7   9  -7    0.81    0.82
  -7   9  -7    0.86    1.03
  -8   9  -7   -0.51    0.85
  -8   9  -7    1.48    1.07
  -9   9  -7    5.57    1.25
 -10   9  -7    1.21    1.06
 -10   9  -7   -0.57    1.08
 -11   9  -7    3.81    1.24
 -11   9  -7    1.81    1.18
 -12   9  -7   -0.66    1.24
 -12  -8   7   -0.16    1.29
 -11  -8   7    1.51    1.25
 -10  -8   7    0.95    1.14
  -9  -8   7    1.29    1.09
  -8  -8   7   -0.53    0.99
   7   8  -7    0.33    0.79
  -7  -8   7   -0.97    0.90
   6   8  -7   32.26    1.66
  -6  -8   7   33.10    1.86
   5   8  -7   86.09    2.94
  -5  -8   7   85.67    2.86
   4   8  -7    8.58    0.95
  -4  -8   7    8.02    0.99
   3   8  -7   28.11    1.52
  -3  -8   7   29.38    1.54
   2   8  -7    5.11    0.85
  -2  -8   7    4.54    0.80
   1   8  -7    6.22    0.86
  -1  -8   7    4.49    0.76
   0   8  -7    1.16    0.72
   0  -8   7    1.92    0.69
  -1   8  -7    0.07    0.69
   1  -8   7    0.82    0.67
  -2   8  -7    0.93    0.73
   2  -8   7    1.67    0.73
  -3   8  -7   49.36    2.07
  -3   8  -7   52.00    1.59
  -4   8  -7    5.89    0.66
  -4   8  -7    5.69    0.94
  -5   8  -7   -0.21    0.80
  -5   8  -7    1.35    0.62
  -6   8  -7    3.90    0.80
  -6   8  -7    4.14    1.04
  -7   8  -7    0.68    0.99
  -7   8  -7    1.24    0.83
  -8   8  -7    3.10    1.05
  -9   8  -7   -0.45    0.97
  -9   8  -7   -0.44    1.01
 -10   8  -7    8.96    1.29
 -10   8  -7    9.52    1.35
 -11   8  -7    5.86    1.27
 -11   8  -7    4.86    1.22
 -12   8  -7    0.28    1.24
 -12  -7   7    0.90    1.31
 -11  -7   7   -0.26    1.19
 -10  -7   7    2.36    1.13
  -9  -7   7    5.62    1.21
  -8  -7   7    0.17    0.93
   7   7  -7   15.49    1.26
  -7  -7   7   13.27    1.26
  -7  -7   7   12.59    1.07
   6   7  -7   48.57    1.83
  -6  -7   7   46.86    2.05
  -6  -7   7   45.29    1.59
   5   7  -7    0.66    0.67
  -5  -7   7    0.23    0.77
  -4  -7   7   93.94    2.86
   3   7  -7    9.13    0.90
  -3  -7   7    9.44    0.92
   2   7  -7   16.82    1.20
  -2  -7   7   17.48    1.21
   1   7  -7   12.81    1.12
  -1  -7   7   12.99    1.08
   0   7  -7   34.23    1.60
   0  -7   7   36.13    1.50
  -1   7  -7    8.92    0.92
   1  -7   7   12.60    0.95
  -2   7  -7    2.04    0.72
   2  -7   7    2.43    0.72
  -3   7  -7    4.04    0.47
  -3   7  -7    3.75    0.78
  -4   7  -7    0.54    0.70
  -4   7  -7    0.92    0.52
  -5   7  -7   -0.14    0.74
  -5   7  -7   -1.26    0.58
  -6   7  -7    0.46    0.84
  -6   7  -7    0.64    0.70
  -7   7  -7   -0.12    0.88
  -8   7  -7    2.04    0.99
  -9   7  -7    1.52    1.00
  -9   7  -7    1.17    0.98
 -10   7  -7   12.58    1.36
 -10   7  -7   11.90    1.38
 -11   7  -7    1.59    1.11
 -11   7  -7    5.84    1.29
 -12   7  -7    1.21    1.24
 -13   7  -7    4.33    1.46
 -13  -6   7    3.47    1.34
 -12  -6   7    4.87    1.31
 -11  -6   7    1.96    0.98
 -11  -6   7    2.70    1.20
 -10  -6   7    1.20    0.85
 -10  -6   7    1.17    1.06
  -9  -6   7    1.05    1.01
  -9  -6   7    1.94    0.78
  -8  -6   7    2.03    0.98
  -8  -6   7    1.76    0.70
   7   6  -7   15.86    1.12
  -7  -6   7   13.16    1.21
  -7  -6   7   15.01    1.11
   6   6  -7   15.02    1.11
  -6  -6   7   15.12    1.36
  -6  -6   7   14.11    0.97
   5   6  -7    2.12    0.66
  -5  -6   7    2.49    0.76
  -5  -6   7    1.48    0.42
  -4  -6   7    2.67    0.70
   3   6  -7    0.50    0.58
  -3  -6   7    1.03    0.60
   2   6  -7    1.46    0.60
  -2  -6   7    1.08    0.61
   1   6  -7    3.18    0.66
  -1  -6   7    3.03    0.64
   0   6  -7   -0.18    0.55
   0  -6   7    0.35    0.55
  -1   6  -7    8.81    0.84
   1  -6   7    9.53    0.85
  -2   6  -7   37.49    1.60
   2  -6   7   38.88    1.55
  -3   6  -7   19.00    0.88
  -3   6  -7   16.07    1.20
  -4   6  -7    7.24    0.86
  -4   6  -7    5.95    0.61
  -5   6  -7    1.06    0.57
  -5   6  -7    2.17    0.74
  -6   6  -7    9.38    0.87
  -6   6  -7    8.39    1.00
  -7   6  -7    1.34    0.84
  -8   6  -7   17.09    1.55
  -8   6  -7   17.10    1.59
  -9   6  -7    1.64    0.96
  -9   6  -7    1.45    0.97
 -10   6  -7    0.66    0.97
 -10   6  -7    0.67    1.04
 -11   6  -7    6.47    1.28
 -11   6  -7    5.48    1.14
 -12   6  -7    0.15    1.19
 -13   6  -7   -3.05    1.25
 -13  -5   7    0.67    1.16
 -13  -5   7    1.05    1.27
 -12  -5   7    1.79    1.06
 -12  -5   7    4.87    1.28
 -11  -5   7    3.34    1.15
 -11  -5   7    0.76    0.92
 -10  -5   7   16.13    1.47
 -10  -5   7   17.12    1.54
  -9  -5   7   44.63    1.92
  -9  -5   7   46.84    2.22
  -8  -5   7    2.74    0.99
  -8  -5   7    3.46    0.75
   7   5  -7    5.10    0.67
  -7  -5   7    5.84    0.74
  -7  -5   7    5.72    0.98
   6   5  -7   43.13    1.62
  -6  -5   7   46.56    1.89
  -6  -5   7   46.26    1.56
   5   5  -7   12.16    0.95
  -5  -5   7   13.44    0.79
  -5  -5   7   12.65    1.15
   4   5  -7   66.25    2.12
  -4  -5   7   68.92    2.20
   3   5  -7    0.71    0.54
  -3  -5   7    0.65    0.56
   2   5  -7   10.46    0.93
  -2  -5   7    8.36    0.78
   1   5  -7   11.28    1.00
  -1  -5   7   12.38    0.99
   0   5  -7    2.76    0.63
   0  -5   7    2.70    0.60
  -1   5  -7    0.47    0.54
   1  -5   7   -0.52    0.51
  -2   5  -7    7.76    0.79
  -2   5  -7    8.25    0.58
   2  -5   7    7.36    0.75
  -3   5  -7    5.57    0.74
  -3   5  -7    4.65    0.50
  -4   5  -7    5.29    0.75
  -4   5  -7    5.26    0.59
  -5   5  -7    5.42    0.80
  -5   5  -7    4.79    0.66
  -6   5  -7    1.40    0.74
  -7   5  -7   -0.62    0.74
  -7   5  -7    0.62    0.72
  -8   5  -7   -1.58    0.80
  -8   5  -7   -1.30    0.79
  -9   5  -7   -0.97    0.92
  -9   5  -7   -1.02    0.84
 -10   5  -7    0.06    0.99
 -10   5  -7   -0.48    0.90
 -11   5  -7   -1.04    1.06
 -11   5  -7   -0.08    0.93
 -12   5  -7   11.55    1.52
 -13   5  -7    1.95    1.34
 -13  -4   7    3.67    1.31
 -13  -4   7    3.47    1.23
 -12  -4   7   -0.59    1.11
 -12  -4   7    0.28    0.99
 -11  -4   7    0.91    1.08
 -11  -4   7    0.76    0.93
 -10  -4   7   19.76    1.75
 -10  -4   7   15.70    1.53
  -9  -4   7    2.00    0.81
  -9  -4   7    1.07    0.94
  -8  -4   7    7.35    0.86
  -8  -4   7    7.01    1.05
   7   4  -7    9.03    0.81
  -7  -4   7    8.54    0.80
  -7  -4   7   10.66    1.06
   6   4  -7    8.10    0.68
  -6  -4   7    7.79    0.89
  -6  -4   7    8.66    0.70
   5   4  -7   22.20    1.06
  -5  -4   7   19.99    0.94
  -5  -4   7   21.60    1.26
   4   4  -7   28.72    1.20
  -4  -4   7   27.05    0.97
  -4  -4   7   28.99    1.34
  -3  -4   7   32.61    1.38
   2   4  -7    0.19    0.49
  -2  -4   7   -0.06    0.52
   1   4  -7    1.56    0.54
  -1  -4   7    0.86    0.54
   0   4  -7    5.43    0.67
   0  -4   7    4.51    0.65
  -1   4  -7    7.35    0.74
   1  -4   7    8.37    0.75
  -2   4  -7   -0.41    0.52
  -2   4  -7   -0.20    0.31
   2  -4   7    0.13    0.53
  -3   4  -7   66.63    2.14
  -3   4  -7   64.38    1.86
  -4   4  -7   70.36    2.24
  -4   4  -7   66.88    2.01
  -5   4  -7    2.03    0.55
  -5   4  -7    1.77    0.63
  -6   4  -7    1.30    0.63
  -6   4  -7    0.45    0.53
  -7   4  -7    1.08    0.71
  -7   4  -7    0.70    0.68
  -8   4  -7   34.46    1.70
  -8   4  -7   33.57    1.79
  -9   4  -7    0.30    0.85
  -9   4  -7    0.85    0.95
 -10   4  -7    8.31    1.21
 -10   4  -7    9.03    1.13
 -11   4  -7    2.18    0.90
 -11   4  -7    3.47    1.16
 -12   4  -7   12.73    1.53
 -13   4  -7   -0.41    1.28
 -14   4  -7    0.26    1.39
 -13  -3   7    7.88    1.43
 -13  -3   7    6.56    1.33
 -12  -3   7    5.49    1.13
 -12  -3   7   -0.28    1.08
 -11  -3   7    7.41    1.12
 -11  -3   7    8.38    1.30
 -10  -3   7    4.00    1.09
 -10  -3   7    2.01    0.89
  -9  -3   7    4.57    0.88
  -9  -3   7    3.58    1.00
  -8  -3   7   27.24    1.44
  -8  -3   7   26.09    1.62
   7   3  -7    0.79    0.43
  -7  -3   7    0.72    0.74
  -7  -3   7    1.50    0.59
   6   3  -7    1.57    0.46
  -6  -3   7    1.98    0.52
  -6  -3   7    2.16    0.69
   5   3  -7   19.47    0.96
  -5  -3   7   21.04    0.95
  -5  -3   7   20.43    1.20
   4   3  -7    2.53    0.49
  -4  -3   7    3.19    0.40
  -4  -3   7    1.76    0.58
  -3  -3   7   28.29    1.26
  -3  -3   7   27.26    0.92
   2   3  -7   32.97    1.27
  -2  -3   7   31.20    1.31
   1   3  -7   -0.36    0.47
  -1  -3   7   -0.57    0.48
   0   3  -7    7.27    0.70
   0  -3   7    7.46    0.68
  -1   3  -7   74.60    2.20
  -1   3  -7   68.45    1.84
   1  -3   7   71.37    2.08
  -2   3  -7    0.83    0.33
  -2   3  -7    0.78    0.52
  -3   3  -7   90.95    2.69
  -3   3  -7   93.22    2.48
  -4   3  -7    0.11    0.55
  -4   3  -7    2.01    0.49
  -5   3  -7   67.55    2.18
  -6   3  -7    0.28    0.57
  -6   3  -7    0.54    0.54
  -7   3  -7   -0.27    0.59
  -7   3  -7   -0.33    0.63
  -8   3  -7    0.23    0.75
  -8   3  -7   -0.22    0.68
  -9   3  -7   24.12    1.69
  -9   3  -7   24.44    1.51
 -10   3  -7  136.78    4.22
 -10   3  -7  133.42    3.96
 -11   3  -7    9.50    1.10
 -11   3  -7   10.13    1.35
 -12   3  -7    0.90    1.13
 -13   3  -7   13.50    1.65
 -14   3  -7   12.87    1.76
 -14  -2   7   -0.45    1.22
 -14  -2   7   -1.11    1.32
 -13  -2   7    3.79    1.28
 -13  -2   7    1.29    1.17
 -12  -2   7    0.00    1.15
 -12  -2   7    0.87    1.06
 -11  -2   7   15.31    1.51
 -11  -2   7   16.07    1.39
 -10  -2   7   24.47    1.80
 -10  -2   7   20.24    1.60
  -9  -2   7   11.20    1.09
  -9  -2   7   14.09    1.28
  -8  -2   7   -1.41    0.63
  -8  -2   7   -0.46    0.75
  -7  -2   7   39.05    1.53
  -7  -2   7   35.68    1.64
   6   2  -7    6.03    0.52
  -6  -2   7    5.60    0.62
  -6  -2   7    5.66    0.79
   5   2  -7   22.61    0.95
  -5  -2   7   24.01    1.24
  -5  -2   7   22.42    1.01
   4   2  -7   21.67    0.96
  -4  -2   7   21.06    0.92
  -4  -2   7   21.41    1.14
   3   2  -7    0.85    0.44
  -3  -2   7    0.38    0.31
  -3  -2   7   -0.08    0.53
   2   2  -7   51.66    1.67
  -2  -2   7   54.17    1.46
  -2  -2   7   56.06    1.74
   1   2  -7   47.90    1.56
  -1  -2   7   47.72    1.55
   0   2  -7   36.55    1.32
   0  -2   7   36.63    1.31
  -1   2  -7    0.50    0.45
   1  -2   7    1.33    0.49
  -2   2  -7   12.61    0.90
  -2   2  -7   12.47    0.68
  -3   2  -7   69.50    2.14
  -3   2  -7   68.99    1.96
  -4   2  -7   11.79    0.92
  -5   2  -7    6.01    0.68
  -5   2  -7    5.39    0.61
  -6   2  -7    0.08    0.51
  -6   2  -7    0.61    0.53
  -7   2  -7    4.11    0.68
  -7   2  -7    2.63    0.69
  -8   2  -7    6.61    0.80
  -8   2  -7    6.66    0.91
  -9   2  -7    2.31    0.77
  -9   2  -7    1.95    0.89
 -10   2  -7   12.65    1.28
 -10   2  -7   12.01    1.08
 -11   2  -7   15.51    1.42
 -11   2  -7   16.56    1.52
 -12   2  -7    0.45    1.13
 -13   2  -7    3.90    1.34
 -14   2  -7   -1.24    1.33
 -14  -1   7   -1.19    1.20
 -14  -1   7    0.87    1.28
 -13  -1   7    5.41    1.30
 -13  -1   7    4.96    1.35
 -12  -1   7    0.91    1.02
 -12  -1   7   -0.99    1.08
 -11  -1   7   15.96    1.49
 -11  -1   7   17.74    1.67
 -10  -1   7   12.23    1.19
 -10  -1   7   14.56    1.36
  -9  -1   7    6.85    0.96
  -9  -1   7    9.80    1.15
  -8  -1   7    8.80    1.00
  -8  -1   7    8.24    0.89
  -7  -1   7    0.24    0.54
  -7  -1   7   -0.60    0.61
  -6  -1   7    6.59    0.76
  -6  -1   7    6.02    0.64
   5   1  -7   11.91    0.72
  -5  -1   7   14.31    1.03
   4   1  -7   19.32    0.86
  -4  -1   7   19.30    0.92
  -4  -1   7   18.93    1.09
   3   1  -7  199.06    4.83
  -3  -1   7  189.49    4.77
  -3  -1   7  192.78    4.74
  -2  -1   7   25.46    1.07
  -2  -1   7   23.13    0.82
   1   1  -7   12.44    0.74
  -1  -1   7   11.06    0.52
  -1  -1   7   13.04    0.79
   0   1  -7   39.01    1.33
   0  -1   7   38.13    1.28
  -1   1  -7   -0.40    0.36
   1  -1   7   -0.16    0.39
  -2   1  -7   12.96    0.86
  -3   1  -7   56.10    1.70
  -3   1  -7   58.05    1.85
  -4   1  -7    7.47    0.71
  -5   1  -7    7.48    0.72
  -5   1  -7    9.66    0.86
  -6   1  -7   -0.05    0.52
  -6   1  -7   -0.09    0.49
  -7   1  -7    5.73    0.68
  -7   1  -7    5.35    0.73
  -8   1  -7    2.84    0.65
  -8   1  -7    2.06    0.74
  -9   1  -7   -0.14    0.62
  -9   1  -7    0.23    0.79
 -10   1  -7   12.07    1.24
 -10   1  -7   11.14    1.02
 -11   1  -7   -0.20    0.74
 -11   1  -7   -0.59    0.99
 -12   1  -7    6.45    1.30
 -13   1  -7    1.65    1.27
 -14   1  -7    4.17    1.43
 -14   0   7   12.12    1.59
 -13   0   7    4.17    1.24
 -12   0   7   24.33    1.98
 -11   0   7    2.25    1.01
 -10   0   7   34.53    1.87
  -9   0   7   24.98    1.58
  -9   0   7   25.87    1.67
  -8   0   7    3.95    0.74
  -8   0   7    2.63    0.80
  -7   0   7   -0.11    0.51
  -7   0   7    0.01    0.63
  -6   0   7    4.44    0.67
  -6   0   7    5.74    0.64
   5   0  -7    1.94    0.37
  -5   0   7    3.08    0.51
  -5   0   7    2.30    0.60
   4   0  -7    6.00    0.51
  -4   0   7    5.99    0.55
  -4   0   7    7.57    0.71
   3   0  -7   38.19    1.24
  -3   0   7   40.41    1.35
  -3   0   7   35.18    1.20
  -2   0   7   12.59    0.62
  -2   0   7   14.27    0.80
   1   0  -7   40.45    1.31
  -1   0   7   41.57    1.30
  -1   0   7   39.78    1.16
   0   0  -7    6.94    0.62
   0   0   7    6.60    0.55
  -1   0  -7   45.40    1.45
   1   0   7   44.81    1.39
  -2   0  -7   81.48    2.30
  -3   0  -7   44.41    1.52
  -4   0  -7    3.91    0.59
  -4   0  -7    4.41    0.57
  -5   0  -7   68.15    2.09
  -5   0  -7   67.43    2.08
  -6   0  -7    3.81    0.58
  -6   0  -7    3.56    0.61
  -7   0  -7    0.49    0.50
  -7   0  -7    0.87    0.60
  -8   0  -7    4.99    0.78
  -8   0  -7    5.35    0.71
  -9   0  -7    4.85    0.73
  -9   0  -7    6.17    0.96
 -10   0  -7    5.47    0.81
 -10   0  -7    7.09    1.08
 -11   0  -7   14.60    1.37
 -11   0  -7   17.36    1.38
 -12   0  -7    3.16    1.16
 -13   0  -7    4.51    1.36
 -14   0  -7   -0.67    1.32
 -14   1   7    1.41    1.27
 -13   1   7    1.10    1.16
 -12   1   7    3.11    1.10
 -11   1   7   23.29    1.83
 -10   1   7    1.58    0.90
  -9   1   7    2.44    0.81
  -8   1   7    0.56    0.72
  -8   1   7   -0.08    0.63
  -7   1   7    3.16    0.69
  -7   1   7    2.31    0.59
  -6   1   7    7.45    0.68
  -6   1   7    7.17    0.73
   5  -1  -7   -0.32    0.32
  -5   1   7    0.43    0.46
  -5   1   7   -0.22    0.50
   4  -1  -7    2.60    0.44
  -4   1   7    1.26    0.45
  -4   1   7    3.28    0.56
   3  -1  -7   52.61    1.55
  -3   1   7   52.49    1.59
  -3   1   7   52.42    1.56
  -2   1   7  236.31    5.61
  -2   1   7  241.47    5.82
   1  -1  -7   20.16    0.87
  -1   1   7   20.41    0.75
  -1   1   7   20.62    0.86
   0  -1  -7   88.16    2.36
   0   1   7   83.77    2.22
  -1  -1  -7   53.85    1.64
  -2  -1  -7    3.05    0.46
  -3  -1  -7   17.79    0.92
  -4  -1  -7    9.00    0.87
  -5  -1  -7   40.44    1.49
  -5  -1  -7   41.54    1.49
  -6  -1  -7    3.70    0.56
  -6  -1  -7    4.28    0.61
  -7  -1  -7   13.42    1.07
  -7  -1  -7   13.94    0.96
  -8  -1  -7   14.27    1.02
  -8  -1  -7   14.44    1.25
  -9  -1  -7    3.87    0.81
  -9  -1  -7    2.96    0.67
 -10  -1  -7   14.25    1.16
 -10  -1  -7   12.13    1.22
 -11  -1  -7   -0.32    0.92
 -12  -1  -7    5.19    1.21
 -13  -1  -7   -0.30    1.15
 -14  -1  -7    4.28    1.42
 -14   2   7    2.34    1.31
 -13   2   7    0.85    1.17
 -12   2   7    6.55    1.25
 -11   2   7    2.72    1.01
 -10   2   7    1.65    0.91
  -9   2   7   56.08    2.19
  -8   2   7    0.34    0.64
  -7   2   7   34.38    1.47
  -7   2   7   32.60    1.47
  -6   2   7    0.61    0.51
  -6   2   7    0.15    0.55
   5  -2  -7   99.24    2.59
  -5   2   7   98.70    2.79
  -5   2   7  100.74    2.69
   4  -2  -7  116.42    3.02
  -4   2   7  118.34    3.13
  -4   2   7  115.36    3.00
   3  -2  -7    0.34    0.38
  -3   2   7    0.89    0.39
  -3   2   7    1.08    0.38
  -2   2   7    2.08    0.34
  -2   2   7    2.21    0.39
   1  -2  -7   88.01    2.36
  -1   2   7   85.27    2.26
  -1   2   7   85.16    2.20
   0  -2  -7   19.82    0.90
   0   2   7   20.17    0.82
   0   2   7   20.20    0.77
  -1  -2  -7   18.81    0.90
  -2  -2  -7   32.37    1.19
  -3  -2  -7   75.95    2.18
  -4  -2  -7  146.03    3.81
  -5  -2  -7   43.56    1.59
  -5  -2  -7   46.31    1.59
  -6  -2  -7    2.33    0.56
  -6  -2  -7    3.21    0.55
  -7  -2  -7    0.23    0.50
  -7  -2  -7    0.18    0.47
  -8  -2  -7   17.59    1.28
  -8  -2  -7   18.99    1.11
  -9  -2  -7    0.46    0.70
  -9  -2  -7   -1.18    0.53
 -10  -2  -7   10.33    1.10
 -10  -2  -7    9.66    0.89
 -11  -2  -7   -0.16    0.94
 -12  -2  -7    0.40    1.06
 -13  -2  -7    1.97    1.18
 -14  -2  -7    1.93    1.31
 -14   3   7   -0.96    1.24
 -13   3   7   11.61    1.50
 -12   3   7    1.12    1.06
 -11   3   7    1.36    0.98
 -10   3   7    1.14    0.87
  -9   3   7   20.84    1.49
  -8   3   7   24.85    1.42
  -7   3   7    8.57    0.80
   6  -3  -7   16.78    0.78
  -6   3   7   15.03    1.03
  -6   3   7   16.88    1.05
   5  -3  -7   58.51    1.90
  -5   3   7   80.21    2.16
   4  -3  -7  137.64    3.50
  -4   3   7  136.17    3.61
   3  -3  -7   84.07    2.27
  -3   3   7   82.20    2.31
  -2   3   7    0.22    0.32
   1  -3  -7   40.56    1.33
  -1   3   7   40.21    1.25
   0  -3  -7   82.49    2.28
   0   3   7   81.87    2.18
  -1  -3  -7  104.22    2.81
  -2  -3  -7   11.48    0.76
  -3  -3  -7   12.03    0.81
  -4  -3  -7    2.39    0.52
  -5  -3  -7   14.22    0.93
  -6  -3  -7   16.28    0.97
  -6  -3  -7   16.79    1.07
  -7  -3  -7    4.38    0.68
  -7  -3  -7    3.91    0.58
  -8  -3  -7    1.17    0.60
  -8  -3  -7    1.30    0.56
  -9  -3  -7   60.06    2.27
  -9  -3  -7   58.71    1.98
 -10  -3  -7   43.13    1.69
 -10  -3  -7   42.10    2.06
 -11  -3  -7    6.03    1.10
 -12  -3  -7    8.81    1.28
 -13  -3  -7    0.68    1.14
 -14  -3  -7    2.20    1.26
 -14   4   7    7.87    1.50
 -13   4   7    6.72    1.34
 -12   4   7   -0.78    0.98
 -11   4   7   49.68    2.34
 -10   4   7    5.97    1.03
  -9   4   7   16.09    1.43
  -8   4   7    1.08    0.70
   7  -4  -7    0.74    0.38
  -7   4   7    0.34    0.55
   6  -4  -7    2.96    0.44
  -6   4   7    3.13    0.59
   5  -4  -7   11.97    0.77
  -5   4   7   10.40    0.90
  -5   4   7   10.79    0.82
   4  -4  -7  177.57    4.48
  -4   4   7  179.42    4.61
  -4   4   7  179.11    4.28
   3  -4  -7    6.52    0.56
  -3   4   7    7.40    0.69
  -3   4   7    6.42    0.59
   2  -4  -7   13.24    0.78
  -2   4   7   13.24    0.73
  -2   4   7   13.49    0.64
   1  -4  -7    7.25    0.68
  -1   4   7    6.26    0.58
  -1   4   7    6.23    0.50
   0  -4  -7   27.77    1.09
   0   4   7   26.64    0.98
  -1  -4  -7   71.00    2.07
  -2  -4  -7   30.31    1.18
  -3  -4  -7   13.43    0.87
  -4  -4  -7   27.54    1.22
  -5  -4  -7    1.59    0.55
  -6  -4  -7   14.39    0.96
  -6  -4  -7   15.53    1.05
  -7  -4  -7    0.00    0.46
  -7  -4  -7    0.54    0.54
  -8  -4  -7   17.78    1.08
  -8  -4  -7   17.46    1.23
  -9  -4  -7    7.72    0.91
  -9  -4  -7    7.36    0.78
 -10  -4  -7    0.54    0.84
 -10  -4  -7    0.40    0.62
 -11  -4  -7   10.97    1.20
 -12  -4  -7    0.32    1.03
 -13  -4  -7    0.14    1.10
 -14  -4  -7   -0.63    1.15
 -14   5   7    7.61    1.52
 -13   5   7    2.88    1.23
 -12   5   7    4.25    1.15
 -11   5   7   23.75    1.84
 -10   5   7   13.56    1.25
  -9   5   7   15.77    1.48
  -8   5   7    6.67    0.87
   7  -5  -7   17.82    0.88
  -7   5   7   17.18    1.17
   6  -5  -7    1.28    0.45
  -6   5   7    1.67    0.53
   5  -5  -7   40.35    1.36
  -5   5   7   37.95    1.50
  -5   5   7   39.51    1.31
   4  -5  -7   12.34    0.87
  -4   5   7   15.66    0.96
  -3   5   7   26.54    1.10
   2  -5  -7   14.05    0.85
  -2   5   7   17.01    0.83
   1  -5  -7    0.01    0.40
  -1   5   7    0.62    0.35
   0  -5  -7    0.00    0.39
   0   5   7    0.29    0.34
  -1  -5  -7    1.47    0.43
  -2  -5  -7  166.53    4.28
  -3  -5  -7    0.64    0.48
  -4  -5  -7   63.35    2.00
  -5  -5  -7    0.07    0.50
  -6  -5  -7   58.93    1.91
  -7  -5  -7   11.17    1.03
  -7  -5  -7   12.67    0.95
  -8  -5  -7   35.04    1.62
  -8  -5  -7   35.06    1.45
  -9  -5  -7   19.98    1.20
  -9  -5  -7   19.22    1.40
 -10  -5  -7    1.18    0.81
 -10  -5  -7    0.97    0.65
 -11  -5  -7    3.04    0.97
 -12  -5  -7    0.49    1.00
 -13  -5  -7    4.56    1.27
 -14  -5  -7   -0.26    1.21
 -14   6   7    2.30    1.37
 -13   6   7   -0.44    1.11
 -12   6   7    4.27    1.20
 -11   6   7    1.76    1.03
 -10   6   7   14.27    1.32
  -9   6   7   23.82    1.62
   8  -6  -7    2.13    0.52
  -8   6   7    1.96    0.69
   7  -6  -7    0.14    0.44
  -7   6   7    0.43    0.56
   6  -6  -7   10.93    0.83
  -6   6   7   12.42    1.02
   5  -6  -7   55.30    1.71
  -5   6   7   53.40    1.83
   4  -6  -7   13.87    0.91
  -4   6   7   11.86    0.95
  -3   6   7   13.04    0.89
   2  -6  -7    1.08    0.47
  -2   6   7    1.49    0.40
   1  -6  -7  184.30    4.71
  -1   6   7  187.10    4.69
   0  -6  -7   51.33    1.65
   0   6   7   52.03    1.58
  -1  -6  -7    0.27    0.42
  -2  -6  -7  234.08    5.88
  -3  -6  -7   84.41    2.48
  -4  -6  -7   20.62    1.16
  -5  -6  -7    2.58    0.60
  -6  -6  -7    0.73    0.53
  -7  -6  -7   10.95    0.96
  -7  -6  -7   11.40    0.93
  -8  -6  -7    7.56    0.76
  -8  -6  -7    5.35    0.81
  -9  -6  -7   66.31    2.44
  -9  -6  -7   65.80    2.17
 -10  -6  -7    4.09    0.96
 -10  -6  -7    5.87    0.79
 -11  -6  -7   25.86    1.86
 -12  -6  -7   -0.69    0.99
 -13  -6  -7   -1.19    1.06
 -14  -6  -7   -0.28    1.19
 -14   7   7    9.85    1.63
 -13   7   7    4.53    1.32
 -12   7   7    5.15    1.24
 -11   7   7   20.95    1.85
 -10   7   7    6.05    1.11
  -9   7   7    8.39    1.06
   8  -7  -7   17.67    1.05
  -8   7   7   19.53    1.44
  -7   7   7    0.19    0.58
  -6   7   7    6.98    0.58
  -6   7   7    7.57    0.79
  -5   7   7   13.44    0.99
  -5   7   7   13.47    0.81
  -4   7   7   26.93    1.12
  -4   7   7   25.54    1.22
  -3   7   7    6.84    0.65
  -3   7   7    8.44    0.79
  -2   7   7    4.94    0.54
  -2   7   7    4.31    0.54
  -1   7   7    5.33    0.55
  -1   7   7    7.16    0.59
   0  -7  -7    6.76    0.69
   0   7   7    6.95    0.57
  -1  -7  -7   16.32    1.00
  -2  -7  -7  243.81    6.12
  -3  -7  -7  149.13    3.98
  -4  -7  -7    9.36    0.82
  -5  -7  -7   16.11    1.07
  -6  -7  -7   -0.13    0.54
  -7  -7  -7    0.89    0.58
  -8  -7  -7    8.91    0.94
  -8  -7  -7    8.60    0.81
  -9  -7  -7    0.89    0.67
  -9  -7  -7    0.71    0.77
 -10  -7  -7   34.52    1.56
 -10  -7  -7   33.15    1.88
 -11  -7  -7    0.80    0.95
 -12  -7  -7   20.85    1.87
 -13  -7  -7   -0.40    1.08
 -14  -7  -7   -0.28    1.26
 -14   8   7    0.01    1.34
 -13   8   7   15.23    1.66
 -12   8   7    0.08    1.09
 -11   8   7    1.74    1.06
 -10   8   7    2.35    0.97
  -9   8   7    1.16    0.87
  -8   8   7   10.36    0.89
  -7   8   7    7.53    0.86
  -7   8   7    5.96    0.61
  -6   8   7    3.03    0.62
  -6   8   7    1.33    0.47
  -5   8   7   21.25    1.20
  -5   8   7   21.37    1.05
  -4   8   7    8.23    0.69
  -4   8   7    7.60    0.72
  -3   8   7   18.99    1.08
  -3   8   7   20.25    1.08
  -2   8   7   89.74    2.55
  -2   8   7   87.48    2.55
  -1   8   7    0.54    0.47
  -1   8   7    0.05    0.43
   0   8   7   33.90    1.27
   0   8   7   30.91    1.28
   1   8   7    1.13    0.49
  -2  -8  -7   31.68    1.46
  -3  -8  -7   28.75    1.40
  -4  -8  -7   52.19    1.82
  -5  -8  -7   10.98    1.04
  -6  -8  -7   10.84    1.00
  -7  -8  -7    5.90    0.79
  -8  -8  -7    1.26    0.65
  -8  -8  -7    1.15    0.73
  -9  -8  -7   -0.82    0.67
  -9  -8  -7    0.54    0.77
 -10  -8  -7   -0.45    0.85
 -10  -8  -7   -0.70    0.69
 -11  -8  -7    0.40    0.92
 -12  -8  -7    1.27    1.07
 -13  -8  -7    1.31    1.17
 -14  -8  -7    0.23    1.26
 -13   9   7    3.29    1.39
 -12   9   7    0.47    1.13
 -11   9   7    0.66    1.02
 -10   9   7    1.92    0.98
  -9   9   7    5.52    0.99
  -9   9   7    3.82    0.67
  -8   9   7   19.60    1.16
  -8   9   7   17.59    1.47
  -7   9   7    5.85    0.67
  -7   9   7    6.12    0.84
  -6   9   7    0.88    0.59
  -6   9   7    0.63    0.49
  -5   9   7    0.50    0.55
  -5   9   7    0.70    0.46
  -4   9   7   12.14    0.99
  -4   9   7   14.21    0.95
  -3   9   7   34.18    1.38
  -3   9   7   32.84    1.40
  -2   9   7    0.40    0.52
  -2   9   7    2.32    0.56
  -1   9   7   62.65    2.00
  -1   9   7   64.27    2.03
   0   9   7  132.79    3.58
   0   9   7  129.21    3.52
   1   9   7   28.99    1.31
   2   9   7   13.26    1.01
  -3  -9  -7   -1.03    0.62
  -4  -9  -7    4.07    0.75
  -5  -9  -7   -0.29    0.61
  -6  -9  -7   12.21    0.98
  -7  -9  -7    7.39    0.86
  -8  -9  -7   21.62    1.39
  -8  -9  -7   22.81    1.52
  -9  -9  -7   10.48    1.11
  -9  -9  -7   10.56    1.00
 -10  -9  -7    3.58    1.01
 -10  -9  -7    4.61    0.85
 -11  -9  -7    2.05    1.02
 -12  -9  -7    0.29    1.05
 -13  -9  -7   -2.02    1.06
 -14  -9  -7    2.40    1.37
 -13  10   7   19.48    1.82
 -12  10   7   -0.94    1.10
 -11  10   7    7.63    1.31
 -10  10   7    5.01    1.11
  -9  10   7    3.22    0.69
  -9  10   7    2.19    0.95
  -8  10   7    0.21    0.61
  -8  10   7    0.55    0.79
  -7  10   7    5.61    0.76
  -7  10   7    5.68    0.86
  -6  10   7   -0.57    0.62
  -6  10   7    0.56    0.55
  -5  10   7    6.57    0.72
  -5  10   7    7.87    0.81
  -4  10   7    1.31    0.55
  -4  10   7    0.63    0.51
  -3  10   7    5.70    0.69
  -3  10   7    5.50    0.68
  -2  10   7   46.04    1.70
  -2  10   7   44.22    1.62
  -1  10   7    2.72    0.55
  -1  10   7    1.79    0.56
   0  10   7   92.47    2.65
   0  10   7   88.87    2.68
   1  10   7    2.16    0.58
   2  10   7   50.89    1.85
   3  10   7   52.82    1.88
  -4 -10  -7    2.40    0.74
  -5 -10  -7    1.12    0.70
  -6 -10  -7    1.92    0.72
  -7 -10  -7    4.68    0.87
  -8 -10  -7   -0.82    0.81
  -8 -10  -7    0.43    0.76
  -9 -10  -7    0.83    0.83
  -9 -10  -7   -0.09    0.79
 -10 -10  -7    1.15    0.97
 -11 -10  -7    7.14    1.20
 -12 -10  -7   20.67    1.92
 -13 -10  -7    2.75    1.26
 -13  11   7    0.45    1.27
 -12  11   7   12.75    1.56
 -11  11   7    0.23    1.06
 -10  11   7   -0.58    0.97
  -9  11   7   -0.34    0.87
  -9  11   7   -0.31    0.67
  -8  11   7   -0.42    0.81
  -8  11   7   -0.33    0.67
  -7  11   7   23.57    1.59
  -7  11   7   24.25    1.45
  -6  11   7    1.89    0.73
  -6  11   7    1.76    0.65
  -5  11   7   22.67    1.38
  -5  11   7   24.68    1.34
  -4  11   7    1.92    0.60
  -4  11   7    2.65    0.62
  -3  11   7   11.22    1.02
  -3  11   7   11.01    0.89
  -2  11   7   69.09    2.21
  -2  11   7   72.54    2.30
  -1  11   7   -0.24    0.49
  -1  11   7   -0.53    0.48
   0  11   7   18.82    1.10
   0  11   7   19.07    1.17
   1  11   7    5.38    0.70
   2  11   7   12.27    1.07
   3  11   7    7.94    0.82
   4  11   7    1.57    0.63
  -5 -11  -7    1.95    0.80
  -6 -11  -7    5.66    0.92
  -7 -11  -7    1.34    0.81
  -8 -11  -7    1.06    0.84
  -9 -11  -7   32.71    1.91
  -9 -11  -7   39.04    1.83
 -10 -11  -7    3.49    1.05
 -11 -11  -7    2.25    1.07
 -12 -11  -7    2.27    1.16
 -13 -11  -7    7.86    1.42
 -12  12   7    0.46    1.26
 -11  12   7   -0.26    1.08
 -10  12   7    9.64    1.33
  -9  12   7    0.66    0.96
  -9  12   7    0.07    0.73
  -8  12   7    2.63    0.80
  -8  12   7    2.35    0.96
  -7  12   7    4.82    1.00
  -7  12   7    5.26    0.89
  -6  12   7   16.89    1.35
  -5  12   7   11.78    1.01
  -5  12   7   12.02    1.01
  -4  12   7   41.32    1.72
  -4  12   7   40.05    1.70
  -3  12   7   11.04    0.93
  -3  12   7   11.33    1.05
  -2  12   7   27.38    1.32
  -2  12   7   27.12    1.39
  -1  12   7   22.61    1.22
  -1  12   7   20.82    1.28
   0  12   7   10.45    0.90
   0  12   7   11.49    0.98
   1  12   7    3.95    0.69
   2  12   7   -0.24    0.57
   3  12   7   57.83    2.12
   4  12   7    1.90    0.73
   5  12   7   29.87    1.55
  -6 -12  -7    0.34    0.86
  -7 -12  -7   19.05    1.56
  -8 -12  -7    3.84    0.97
  -9 -12  -7    0.76    0.94
  -9 -12  -7    0.95    0.90
 -10 -12  -7    2.78    1.03
 -11 -12  -7    3.66    1.16
 -12 -12  -7    0.26    1.11
 -13 -12  -7    3.48    1.36
 -12  13   7   -2.05    1.23
 -11  13   7    1.41    1.19
 -10  13   7    4.69    1.20
  -9  13   7    2.09    0.89
  -9  13   7    2.57    1.08
  -8  13   7    5.17    0.96
  -8  13   7    3.62    1.06
  -7  13   7    1.53    0.91
  -7  13   7    3.56    0.87
  -6  13   7   26.76    1.61
  -6  13   7   24.12    1.64
  -5  13   7    8.13    0.95
  -5  13   7    8.62    1.00
  -4  13   7    5.28    0.80
  -4  13   7    3.87    0.80
  -3  13   7   -0.16    0.62
  -3  13   7   -0.60    0.58
  -2  13   7    1.04    0.65
  -2  13   7    0.11    0.59
  -1  13   7   32.31    1.48
  -1  13   7   31.43    1.56
   0  13   7   15.34    1.11
   0  13   7   16.06    1.23
   1  13   7   -0.10    0.61
   2  13   7    0.85    0.65
   3  13   7    1.76    0.73
   4  13   7    2.93    0.83
   5  13   7    0.78    0.81
   6  13   7   45.89    2.00
  -7 -13  -7   11.96    1.27
  -8 -13  -7   -1.45    0.92
  -9 -13  -7   31.45    1.90
  -9 -13  -7   33.75    1.97
 -10 -13  -7    1.50    1.00
 -11 -13  -7   14.92    1.48
 -12 -13  -7   -1.21    1.08
 -12  14   7    7.79    1.54
 -11  14   7    2.60    1.24
 -10  14   7    0.54    1.12
  -9  14   7   -0.40    0.86
  -9  14   7    0.74    1.02
  -8  14   7    4.57    1.12
  -8  14   7    5.79    1.00
  -7  14   7    0.18    0.79
  -7  14   7   -0.45    0.91
  -6  14   7    7.53    1.08
  -6  14   7    8.49    1.07
  -5  14   7    3.35    0.88
  -5  14   7    2.40    0.87
  -4  14   7    1.28    0.76
  -4  14   7    0.71    0.75
  -3  14   7    4.42    0.88
  -3  14   7    5.00    0.83
  -2  14   7    0.68    0.69
  -2  14   7    0.33    0.66
  -1  14   7    8.77    0.88
  -1  14   7    8.46    0.95
   0  14   7    3.16    0.79
   0  14   7    3.43    0.73
   1  14   7   41.41    1.85
   2  14   7    7.08    0.94
   3  14   7   50.01    2.07
   4  14   7    0.88    0.83
   5  14   7   10.88    1.18
   6  14   7    3.92    0.96
  -7 -14  -7    3.85    1.15
  -8 -14  -7    3.25    1.13
  -9 -14  -7   17.95    1.70
  -9 -14  -7   14.77    1.39
 -10 -14  -7    4.86    1.11
 -11 -14  -7    2.57    1.16
 -12 -14  -7    0.08    1.18
 -11  15   7    1.59    1.24
 -10  15   7    4.58    1.28
  -9  15   7    0.26    1.07
  -9  15   7    1.72    0.95
  -8  15   7    1.20    0.97
  -8  15   7    2.43    1.10
  -7  15   7    0.63    0.94
  -7  15   7   -2.25    0.83
  -6  15   7   11.64    1.27
  -6  15   7   12.89    1.28
  -5  15   7    4.84    1.03
  -5  15   7    5.10    0.99
  -4  15   7    0.38    0.85
  -3  15   7   46.19    2.09
  -3  15   7   47.40    2.01
  -2  15   7   16.05    1.37
  -2  15   7   17.45    1.51
  -1  15   7    2.82    0.80
  -1  15   7    2.88    0.86
   0  15   7    0.87    0.75
   0  15   7   -0.05    0.72
   1  15   7    4.13    0.91
   2  15   7   26.48    1.68
   3  15   7    5.04    1.01
   4  15   7  103.42    3.39
   5  15   7   10.66    1.25
   6  15   7    2.32    1.01
   7  15   7   21.20    1.72
  -8 -15  -7    4.62    1.19
  -9 -15  -7   13.73    1.37
  -9 -15  -7   11.89    1.36
 -10 -15  -7    6.34    1.18
 -11 -15  -7    2.75    1.21
 -11  16   7   -2.04    1.23
 -10  16   7    1.26    1.19
  -9  16   7    3.86    1.22
  -9  16   7    0.06    1.02
  -8  16   7   -0.89    0.94
  -8  16   7    1.98    1.08
  -7  16   7   -0.10    0.98
  -7  16   7   -1.29    0.93
  -6  16   7    6.31    1.15
  -6  16   7    4.76    1.08
  -5  16   7   19.59    1.67
  -5  16   7   17.03    1.49
  -4  16   7   16.15    1.49
  -4  16   7   19.95    1.72
  -3  16   7   -0.38    0.78
  -3  16   7   -0.41    0.84
  -2  16   7   14.10    1.34
  -2  16   7   13.47    1.31
  -1  16   7   39.08    2.05
  -1  16   7   44.70    1.91
   0  16   7   19.30    1.58
   0  16   7   15.33    1.39
   1  16   7    0.08    0.86
   2  16   7    0.89    0.94
   3  16   7    1.33    0.95
   4  16   7   20.23    1.76
   5  16   7   25.79    1.90
   6  16   7   -0.87    1.00
   7  16   7    1.56    1.04
  -8 -16  -7   10.97    1.40
  -9 -16  -7    2.47    1.23
  -9 -16  -7    2.26    1.11
 -10 -16  -7    0.36    1.02
 -11 -16  -7    0.93    1.16
 -10  17   7    0.20    1.20
  -9  17   7   -1.65    1.04
  -9  17   7    0.01    1.14
  -8  17   7   -0.26    1.05
  -8  17   7    0.50    1.09
  -7  17   7    3.15    1.12
  -7  17   7    4.45    1.20
  -6  17   7    4.30    1.19
  -6  17   7    5.39    1.10
  -5  17   7   -0.58    0.88
  -5  17   7    0.14    0.98
  -4  17   7    1.77    0.93
  -4  17   7   -0.67    0.95
  -3  17   7   18.75    1.72
  -3  17   7   19.08    1.57
  -2  17   7   54.56    2.44
  -2  17   7   55.87    2.26
  -1  17   7    6.15    1.13
  -1  17   7    4.39    0.93
   0  17   7    1.72    0.96
   1  17   7   -0.60    0.94
   2  17   7   21.96    1.85
   3  17   7   13.87    1.40
  -4 -17  -7    2.83    1.01
   4  17   7    2.86    1.12
   5  17   7    0.70    1.06
   6  17   7    4.46    1.18
   7  17   7    0.36    1.04
  -9 -17  -7    1.76    1.09
  -9 -17  -7    1.37    1.24
 -10 -17  -7    1.84    1.10
  -9  18   7   -0.07    1.17
  -9  18   7   -0.18    1.19
  -8  18   7    1.85    1.17
  -8  18   7    1.69    1.17
  -7  18   7    0.94    1.09
  -7  18   7   -0.61    1.09
  -6  18   7   -1.38    0.95
  -6  18   7   -0.72    1.07
  -5  18   7    5.95    1.11
  -5  18   7    2.93    1.16
  -4  18   7    6.62    1.29
  -4  18   7    6.60    1.13
  -3  18   7    6.56    1.25
  -3  18   7    7.14    1.09
  -2  18   7    4.66    0.98
  -2  18   7    3.50    1.12
  -1  18   7   -0.50    1.01
  -1  18   7    0.94    0.84
   0  18   7    0.55    1.01
   1  18   7    0.77    1.06
   2  18   7    0.45    1.09
   3  18   7   47.08    2.46
   4  18   7   -0.86    1.09
  -5 -18  -7   20.39    1.53
   5  18   7   20.63    1.94
   6  18   7   -1.88    1.07
   7  18   7    1.38    1.19
   8  18   7   -1.60    1.11
  -9 -18  -7    2.42    1.18
  -8  19   7    1.23    1.19
  -8  19   7    0.52    1.25
  -7  19   7    0.52    1.24
  -7  19   7   -3.10    1.04
  -6  19   7   -1.36    1.15
  -6  19   7    2.76    1.08
  -5  19   7    1.84    1.05
  -5  19   7    0.13    1.15
  -4  19   7    1.84    1.00
  -4  19   7    2.88    1.24
  -3  19   7    1.13    0.97
  -3  19   7    2.35    1.17
  -2  19   7   -0.70    0.87
  -2  19   7   -0.28    1.10
  -1  19   7    8.24    1.34
  -1  19   7    8.53    1.08
   0  19   7    0.83    1.12
   1  19   7   14.45    1.56
   2  19   7    5.97    1.32
   3  19   7    1.70    1.19
   4  19   7    0.83    1.24
   5  19   7    5.16    1.30
   6  19   7    5.43    1.38
  -7 -19  -7    9.14    1.47
   7  19   7    7.89    1.44
  -8 -19  -7    2.32    1.45
   8  19   7    3.65    1.31
  -7  20   7   12.08    1.50
  -6  20   7    1.08    1.31
  -6  20   7   -1.49    1.05
  -5  20   7   -0.16    1.23
  -5  20   7   -0.60    1.05
  -4  20   7   13.08    1.63
  -4  20   7   10.37    1.28
  -3  20   7    0.71    0.95
  -3  20   7    0.16    1.20
  -2  20   7    1.66    1.22
  -2  20   7    2.14    0.98
  -1  20   7    6.90    1.37
   0  20   7    2.49    1.19
   1  20   7    1.41    1.25
   2  20   7    6.05    1.44
   3  20   7    0.12    1.22
   4  20   7    0.67    1.29
   5  20   7   -2.27    1.23
   6  20   7    9.42    1.54
   7  20   7    1.09    1.31
  -6  21   7    0.42    1.39
  -6  21   7    1.71    1.22
  -5  21   7    1.87    1.37
  -5  21   7   -1.17    1.05
  -4  21   7    7.24    1.55
  -4  21   7    8.15    1.26
  -3  21   7    0.74    1.30
  -3  21   7    0.01    1.05
  -2  21   7    6.14    1.44
  -1  21   7    1.47    1.26
   0  21   7    0.75    1.30
   1  21   7   -0.76    1.25
   2  21   7   36.20    2.53
   3  21   7    0.09    1.33
   4  21   7    1.25    1.40
   5  21   7    0.18    1.35
   6  21   7    0.06    1.36
  -4  22   7   -0.55    1.13
  -4  22   7    0.42    1.40
  -3  22   7    2.39    1.42
  -2  22   7    0.20    1.36
  -1  22   7    0.69    1.34
   0  22   7    0.43    1.34
   1  22   7    9.57    1.65
   2  22   7    2.19    1.48
   3  22   7    4.13    1.55
   4  22   7    1.88    1.52
  -1  23   7    0.39    1.41
   0  23   7    3.94    1.59
   1  23   7    3.20    1.57
   0  17  -8    0.03    1.48
  -1  17  -8    4.66    1.60
   4  16  -8   -0.43    1.36
   3  16  -8    4.20    1.49
  -3 -16   8    2.12    1.41
   2  16  -8   -0.88    1.33
  -2 -16   8   -2.59    1.25
   1  16  -8   -1.29    1.29
  -1 -16   8   -1.64    1.24
   0  16  -8    4.43    1.48
   0 -16   8    1.26    1.27
  -1  16  -8    4.95    1.49
   1 -16   8    3.27    1.35
  -2  16  -8   14.01    1.81
  -3  16  -8    3.99    1.51
  -4  16  -8    3.27    1.47
   6  15  -8    2.15    1.43
   5  15  -8   -0.69    1.31
  -5 -15   8    1.16    1.43
   4  15  -8    0.78    1.32
  -4 -15   8    1.31    1.31
   3  15  -8   -0.22    1.23
  -3 -15   8   -1.13    1.26
   2  15  -8   -0.31    1.23
  -2 -15   8   -2.12    1.17
   1  15  -8    2.37    1.33
  -1 -15   8    1.44    1.22
   0  15  -8    3.66    1.42
   0 -15   8    2.90    1.25
  -1  15  -8    0.98    1.32
   1 -15   8    0.42    1.20
  -2  15  -8    2.75    1.36
  -3  15  -8    1.29    1.34
  -4  15  -8   16.40    1.84
  -5  15  -8   -1.79    1.29
  -6  15  -8    4.12    1.49
  -7 -14   8   -0.37    1.40
   6  14  -8   -0.91    1.27
  -6 -14   8   -0.24    1.35
   5  14  -8   -1.02    1.21
  -5 -14   8    2.20    1.33
   4  14  -8    0.94    1.27
  -4 -14   8    3.71    1.30
   3  14  -8   -0.13    1.17
  -3 -14   8    2.13    1.25
   2  14  -8    4.77    1.35
  -2 -14   8    5.88    1.32
   1  14  -8    2.21    1.30
  -1 -14   8    1.72    1.18
   0  14  -8    2.57    1.26
   0 -14   8    2.97    1.17
  -1  14  -8   -2.75    1.11
   1 -14   8    1.88    1.13
  -2  14  -8   -2.05    1.16
   2 -14   8   -2.07    1.08
  -3  14  -8    3.24    1.30
  -4  14  -8    0.63    1.21
  -5  14  -8   -0.80    1.21
  -6  14  -8    0.09    1.29
  -7  14  -8   -0.60    1.34
  -8 -13   8    2.34    1.47
  -7 -13   8    0.31    1.34
  -6 -13   8    2.33    1.34
   5  13  -8   -0.14    1.16
  -5 -13   8    0.69    1.25
   4  13  -8    5.86    1.30
  -4 -13   8    5.03    1.29
   3  13  -8   -0.63    1.09
  -3 -13   8    0.22    1.11
   2  13  -8    3.74    1.19
  -2 -13   8    4.49    1.21
   1  13  -8    6.04    1.26
  -1 -13   8    6.32    1.21
   0  13  -8    6.49    1.31
   0 -13   8    3.23    1.15
  -1  13  -8    1.54    1.16
   1 -13   8    0.71    1.08
  -2  13  -8    0.21    1.13
   2 -13   8   -0.30    1.08
  -3  13  -8    1.37    1.16
  -4  13  -8    2.27    1.23
  -5  13  -8    0.18    1.20
  -6  13  -8    1.37    1.24
  -7  13  -8    1.99    1.36
  -8  13  -8   -1.32    1.32
  -9  13  -8    0.39    1.38
  -9 -12   8    2.56    1.45
  -8 -12   8    0.57    1.33
  -7 -12   8   -0.12    1.23
  -6 -12   8    0.57    1.17
  -5 -12   8    2.33    1.21
   4  12  -8    3.54    1.18
  -4 -12   8    4.48    1.21
   3  12  -8    0.23    1.06
  -3 -12   8   -1.51    1.03
   2  12  -8   -0.32    1.06
  -2 -12   8   -0.71    1.00
   1  12  -8    2.44    1.11
  -1 -12   8    1.14    1.05
   0  12  -8   14.88    1.49
   0 -12   8   13.50    1.35
  -1  12  -8    2.61    1.12
   1 -12   8    3.43    1.09
  -2  12  -8    7.16    1.27
   2 -12   8    7.92    1.22
  -3  12  -8   36.92    2.17
  -4  12  -8    4.31    1.18
  -5  12  -8   -0.26    1.09
  -6  12  -8    3.50    1.26
  -7  12  -8    0.58    1.21
  -8  12  -8    6.17    1.45
  -9  12  -8    5.93    1.50
  -9 -11   8    0.93    1.34
  -8 -11   8    2.91    1.31
  -7 -11   8    0.35    1.15
  -6 -11   8    6.72    1.28
   5  11  -8    5.00    1.12
  -5 -11   8    3.97    1.17
   4  11  -8    9.29    1.27
  -4 -11   8    8.73    1.26
   3  11  -8    8.78    1.25
  -3 -11   8   10.14    1.27
   2  11  -8    0.87    1.01
  -2 -11   8    0.61    0.95
   1  11  -8    1.36    1.02
  -1 -11   8    1.93    0.99
   0  11  -8    1.87    1.04
   0 -11   8    2.27    1.01
  -1  11  -8    0.16    0.99
   1 -11   8   -0.60    0.92
  -2  11  -8   -0.54    0.95
   2 -11   8   -0.88    0.93
  -3  11  -8    7.82    1.24
  -4  11  -8    7.81    1.24
  -5  11  -8   16.38    1.54
  -6  11  -8    3.07    1.16
  -7  11  -8    1.01    1.16
  -8  11  -8   -0.34    1.15
  -9  11  -8    3.45    1.35
 -10  11  -8    3.12    1.40
 -10 -10   8   16.63    1.78
  -9 -10   8   -0.62    1.19
  -8 -10   8    2.18    1.20
   7  10  -8   -0.37    0.97
  -7 -10   8    0.16    1.09
   6  10  -8    0.89    0.92
  -6 -10   8   -1.07    1.01
  -5 -10   8    0.08    0.98
   4  10  -8   -1.72    0.89
  -4 -10   8    0.53    0.97
   3  10  -8    5.25    1.08
  -3 -10   8    5.28    1.04
   2  10  -8   18.35    1.65
  -2 -10   8   20.96    1.58
   1  10  -8    0.38    0.97
  -1 -10   8    0.83    0.89
   0  10  -8    1.92    0.95
   0 -10   8    2.44    0.92
  -1  10  -8   15.34    1.41
   1 -10   8   17.77    1.56
  -2  10  -8   -0.06    0.93
   2 -10   8    0.31    0.92
  -3  10  -8    8.50    1.22
  -4  10  -8    4.64    1.10
  -5  10  -8    9.12    1.30
  -6  10  -8    3.39    1.18
  -7  10  -8    0.66    1.13
  -8  10  -8    0.16    1.12
  -9  10  -8   11.52    1.50
 -10  10  -8    0.44    1.22
 -11  10  -8    2.67    1.36
 -11  -9   8    2.23    1.38
 -10  -9   8    4.91    1.32
  -9  -9   8    0.46    1.14
  -8  -9   8    2.71    1.13
   7   9  -8    2.08    0.92
  -7  -9   8    2.86    1.09
   6   9  -8    2.64    0.93
  -6  -9   8    3.08    1.06
  -5  -9   8    2.54    1.00
   4   9  -8   -0.30    0.86
  -4  -9   8    0.49    0.92
   3   9  -8   -0.03    0.83
  -3  -9   8   -0.37    0.87
   2   9  -8    8.78    1.10
  -2  -9   8   10.04    1.09
   1   9  -8   10.67    1.19
  -1  -9   8   13.18    1.14
   0   9  -8    1.22    0.86
   0  -9   8    0.94    0.83
  -1   9  -8    1.29    0.88
   1  -9   8    2.21    0.86
  -2   9  -8    1.71    0.88
   2  -9   8    2.41    0.90
  -3   9  -8    7.70    1.12
  -4   9  -8    1.28    0.93
  -5   9  -8    2.23    1.01
  -6   9  -8    1.64    0.82
  -6   9  -8    2.14    1.06
  -7   9  -8    1.23    0.81
  -7   9  -8    1.30    1.06
  -8   9  -8    4.64    1.24
  -8   9  -8    4.86    0.99
  -9   9  -8    2.06    1.20
 -10   9  -8    1.59    1.21
 -11   9  -8   -2.09    1.08
 -11   9  -8   -1.43    1.16
 -11  -8   8    9.12    1.50
 -10  -8   8    5.86    1.32
  -9  -8   8    8.93    1.34
  -8  -8   8   14.29    1.45
   7   8  -8   19.88    1.47
  -7  -8   8   15.79    1.42
   6   8  -8   26.54    1.61
  -6  -8   8   26.65    1.79
  -5  -8   8   15.22    1.31
   4   8  -8   17.93    1.41
  -4  -8   8   15.06    1.26
   3   8  -8   10.62    1.07
  -3  -8   8   12.24    1.09
   2   8  -8   41.74    1.88
  -2  -8   8   40.53    1.82
   1   8  -8    1.39    0.80
  -1  -8   8    2.76    0.79
   0   8  -8    4.56    0.90
   0  -8   8    4.41    0.81
  -1   8  -8   -0.44    0.72
   1  -8   8   -0.72    0.70
  -2   8  -8    3.79    0.87
   2  -8   8    4.97    0.88
  -3   8  -8   -0.42    0.76
  -4   8  -8   -0.30    0.80
  -4   8  -8   -0.01    0.55
  -5   8  -8    4.38    0.72
  -5   8  -8    3.75    0.99
  -6   8  -8    0.06    0.73
  -6   8  -8   -0.49    0.94
  -7   8  -8   -0.21    0.97
  -7   8  -8    0.01    0.80
  -8   8  -8   -1.39    0.86
  -8   8  -8    0.35    1.03
  -9   8  -8   10.51    1.39
 -10   8  -8    3.27    1.21
 -10   8  -8    3.58    1.15
 -11   8  -8    2.50    1.23
 -11   8  -8    2.13    1.22
 -12   8  -8    5.66    1.43
 -12  -7   8    0.05    1.24
 -11  -7   8    7.40    1.38
 -10  -7   8    5.43    1.23
  -9  -7   8   -0.56    1.02
  -8  -7   8    1.30    1.03
   7   7  -8   -0.10    0.74
  -7  -7   8   -1.88    0.82
   6   7  -8    1.31    0.79
  -6  -7   8    1.54    0.91
   5   7  -8   29.80    1.60
  -5  -7   8   29.95    1.74
  -4  -7   8   11.79    1.06
   3   7  -8   22.01    1.37
  -3  -7   8   20.12    1.40
   2   7  -8   35.76    1.65
  -2  -7   8   32.22    1.58
   1   7  -8   20.69    1.36
  -1  -7   8   23.07    1.34
   0   7  -8   17.72    1.33
   0  -7   8   19.65    1.27
  -1   7  -8    1.70    0.71
   1  -7   8    3.09    0.72
  -2   7  -8    3.82    0.79
   2  -7   8    5.17    0.82
  -3   7  -8   23.82    1.00
  -3   7  -8   22.08    1.43
  -4   7  -8   17.57    1.44
  -4   7  -8   17.57    1.08
  -5   7  -8    4.75    0.94
  -5   7  -8    6.39    0.77
  -6   7  -8    8.01    0.92
  -6   7  -8    6.61    1.08
  -7   7  -8    0.22    0.95
  -7   7  -8    0.71    0.84
  -8   7  -8    0.44    0.98
  -9   7  -8    5.62    1.14
  -9   7  -8    7.36    1.25
 -10   7  -8    1.53    1.09
 -10   7  -8    1.23    1.10
 -11   7  -8    2.91    1.20
 -11   7  -8    0.77    1.10
 -12   7  -8   -0.04    1.23
 -12  -6   8    1.07    1.28
 -11  -6   8    1.14    1.14
 -10  -6   8    2.17    1.15
  -9  -6   8   -0.47    1.00
  -8  -6   8   -0.23    0.66
  -8  -6   8   -0.92    0.89
   7   6  -8   29.68    1.45
  -7  -6   8   30.69    1.82
  -7  -6   8   31.09    1.38
   6   6  -8    4.81    0.79
  -6  -6   8    3.24    0.57
  -6  -6   8    3.10    0.88
   5   6  -8    0.54    0.63
  -5  -6   8    0.28    0.75
  -5  -6   8    0.33    0.38
  -4  -6   8   11.69    1.01
   3   6  -8   10.31    0.90
  -3  -6   8    9.39    0.90
   2   6  -8    9.73    0.90
  -2  -6   8    9.85    0.89
   1   6  -8   43.75    1.73
  -1  -6   8   43.79    1.68
   0   6  -8   -0.74    0.57
   0  -6   8   -0.33    0.57
  -1   6  -8    0.82    0.66
   1  -6   8    1.17    0.65
  -2   6  -8   68.50    2.39
   2  -6   8   72.12    2.25
  -3   6  -8    4.18    0.49
  -3   6  -8    4.00    0.80
  -4   6  -8   -0.23    0.48
  -4   6  -8    0.15    0.69
  -5   6  -8   15.76    1.36
  -5   6  -8   15.65    1.11
  -6   6  -8    8.41    0.89
  -6   6  -8   11.51    1.14
  -7   6  -8   11.39    1.21
  -8   6  -8    1.69    0.97
  -9   6  -8    9.69    1.21
 -10   6  -8   -1.40    1.00
 -10   6  -8   -0.32    0.98
 -11   6  -8    1.94    1.07
 -11   6  -8    0.70    1.14
 -12   6  -8   -0.65    1.15
 -13   6  -8   -1.31    1.27
 -13  -5   8   20.74    1.88
 -12  -5   8    2.20    1.25
 -12  -5   8    1.89    1.16
 -11  -5   8   -1.46    1.08
 -11  -5   8   -0.37    0.93
 -10  -5   8    4.82    1.18
 -10  -5   8    5.41    0.96
  -9  -5   8    4.07    0.86
  -9  -5   8    5.23    1.10
  -8  -5   8    2.42    0.98
  -8  -5   8    4.10    0.76
   7   5  -8    3.73    0.68
  -7  -5   8    3.83    0.94
  -7  -5   8    2.54    0.65
   6   5  -8    1.46    0.62
  -6  -5   8    1.76    0.78
  -6  -5   8    1.98    0.55
   5   5  -8   76.00    2.35
  -5  -5   8   76.80    2.49
  -5  -5   8   75.78    2.13
  -4  -5   8    9.26    0.90
   3   5  -8   37.72    1.52
  -3  -5   8   35.52    1.56
   2   5  -8   -0.10    0.55
  -2  -5   8    0.01    0.56
   1   5  -8   14.10    1.08
  -1  -5   8   14.88    1.07
   0   5  -8   18.93    1.15
   0  -5   8   18.03    1.13
  -1   5  -8    1.03    0.59
   1  -5   8   -0.63    0.57
  -2   5  -8   16.25    1.15
  -2   5  -8   18.48    0.76
   2  -5   8   17.47    1.16
  -3   5  -8   -0.10    0.41
  -3   5  -8   -0.27    0.58
  -4   5  -8    9.86    0.85
  -4   5  -8    8.19    0.87
  -5   5  -8   -0.97    0.54
  -5   5  -8   -0.16    0.67
  -6   5  -8    5.51    0.80
  -6   5  -8    6.88    0.95
  -7   5  -8    2.82    0.89
  -8   5  -8    5.79    0.98
  -8   5  -8    5.48    1.07
  -9   5  -8   10.69    1.25
  -9   5  -8   13.63    1.27
 -10   5  -8   -0.53    0.99
 -10   5  -8    0.17    0.95
 -11   5  -8    7.61    1.29
 -11   5  -8    7.34    1.20
 -12   5  -8    0.61    1.19
 -13   5  -8    0.93    1.30
 -13  -4   8    3.63    1.31
 -13  -4   8    6.28    1.30
 -12  -4   8   -0.24    1.02
 -12  -4   8    0.52    1.14
 -11  -4   8   10.50    1.21
 -11  -4   8    9.37    1.34
 -10  -4   8   -0.73    0.98
 -10  -4   8   -1.70    0.81
  -9  -4   8   27.38    1.85
  -9  -4   8   26.74    1.59
  -8  -4   8    2.37    0.73
  -8  -4   8    1.72    0.90
   7   4  -8    1.38    0.57
  -7  -4   8   -0.07    0.59
  -7  -4   8    0.56    0.82
   6   4  -8   50.33    1.70
  -6  -4   8   50.99    1.98
  -6  -4   8   45.78    1.62
   5   4  -8   21.37    1.12
  -5  -4   8   20.84    0.97
  -5  -4   8   22.30    1.33
   4   4  -8   38.96    1.46
  -4  -4   8   39.68    1.60
  -4  -4   8   35.62    1.18
   3   4  -8   39.78    1.53
  -3  -4   8   42.20    1.60
   2   4  -8    0.70    0.51
  -2  -4   8    0.14    0.53
   1   4  -8   27.23    1.27
  -1  -4   8   26.45    1.24
   0   4  -8    2.97    0.61
   0  -4   8    2.33    0.58
  -1   4  -8    2.29    0.59
   1  -4   8    3.70    0.66
  -2   4  -8   11.61    0.65
  -2   4  -8   11.49    0.99
   2  -4   8   14.64    1.02
  -3   4  -8   48.33    1.48
  -3   4  -8   47.63    1.80
  -4   4  -8   16.06    0.93
  -4   4  -8   15.72    1.14
  -5   4  -8   36.37    1.42
  -5   4  -8   37.01    1.61
  -6   4  -8    1.26    0.70
  -7   4  -8   25.47    1.47
  -7   4  -8   26.36    1.53
  -8   4  -8    5.70    0.99
  -8   4  -8    3.74    0.93
  -9   4  -8   30.42    1.84
  -9   4  -8   33.19    1.96
 -10   4  -8   -0.20    1.00
 -10   4  -8   -1.16    0.89
 -11   4  -8    3.38    1.20
 -11   4  -8    5.23    1.10
 -12   4  -8    3.66    1.28
 -13   4  -8   -0.28    1.25
 -13  -3   8    0.26    1.25
 -13  -3   8    0.61    1.16
 -12  -3   8   12.63    1.36
 -12  -3   8   11.07    1.44
 -11  -3   8   15.39    1.36
 -11  -3   8   16.27    1.50
 -10  -3   8    1.07    0.88
 -10  -3   8    1.42    0.99
  -9  -3   8   19.84    1.47
  -9  -3   8   19.19    1.67
  -8  -3   8   36.92    1.63
  -8  -3   8   32.76    1.85
   7   3  -8    2.48    0.52
  -7  -3   8    1.80    0.76
  -7  -3   8    1.13    0.63
   6   3  -8    9.16    0.81
  -6  -3   8    9.39    0.87
  -6  -3   8    8.90    0.93
   5   3  -8    3.80    0.55
  -5  -3   8    2.42    0.67
  -5  -3   8    3.99    0.50
   4   3  -8   51.32    1.74
  -4  -3   8   55.69    1.60
  -4  -3   8   57.36    1.90
  -3  -3   8    0.16    0.53
  -3  -3   8    0.75    0.29
   2   3  -8   22.21    1.13
  -2  -3   8   23.76    1.19
   1   3  -8    2.06    0.56
  -1  -3   8    1.53    0.53
   0   3  -8    0.08    0.51
   0  -3   8    0.63    0.52
  -1   3  -8    0.40    0.51
  -1   3  -8    0.18    0.28
   1  -3   8    1.21    0.57
  -2   3  -8   11.95    0.96
  -2   3  -8   10.95    0.65
   2  -3   8   12.70    0.98
  -3   3  -8    2.36    0.43
  -3   3  -8    1.88    0.58
  -4   3  -8   20.03    0.99
  -4   3  -8   20.07    1.18
  -5   3  -8   57.83    2.03
  -5   3  -8   56.85    1.83
  -6   3  -8    3.49    0.67
  -6   3  -8    2.33    0.67
  -7   3  -8   26.22    1.47
  -7   3  -8   29.79    1.50
  -8   3  -8   32.00    1.67
  -8   3  -8   33.98    1.74
  -9   3  -8    0.10    0.93
  -9   3  -8    0.34    0.80
 -10   3  -8    2.97    1.08
 -10   3  -8    2.38    0.91
 -11   3  -8    2.92    1.00
 -11   3  -8    1.94    1.16
 -12   3  -8    3.55    1.26
 -13   3  -8    0.28    1.25
 -14   3  -8    0.35    1.38
 -13  -2   8    1.71    1.18
 -13  -2   8    3.16    1.24
 -12  -2   8    2.76    1.16
 -12  -2   8    0.64    1.05
 -11  -2   8    0.12    1.02
 -11  -2   8    0.20    0.90
 -10  -2   8   18.62    1.72
 -10  -2   8   23.80    1.61
  -9  -2   8   10.01    1.02
  -9  -2   8    9.87    1.16
  -8  -2   8    1.18    0.71
  -8  -2   8    2.18    0.86
  -7  -2   8    2.68    0.61
  -7  -2   8    2.53    0.77
   6   2  -8   21.28    0.96
  -6  -2   8   21.97    1.31
  -6  -2   8   20.30    1.05
   5   2  -8   28.22    1.13
  -5  -2   8   29.91    1.39
  -5  -2   8   29.60    1.17
   4   2  -8    4.60    0.55
  -4  -2   8    4.44    0.45
  -4  -2   8    4.05    0.64
  -3  -2   8   -0.15    0.49
   2   2  -8   26.60    1.17
  -2  -2   8   26.75    0.89
  -2  -2   8   28.86    1.25
   1   2  -8   29.89    1.27
  -1  -2   8   31.34    1.30
   0   2  -8  134.37    3.56
   0  -2   8  130.60    3.41
  -1   2  -8    5.94    0.67
   1  -2   8    5.85    0.68
  -2   2  -8   11.94    0.95
  -2   2  -8   11.23    0.71
  -3   2  -8   26.52    1.27
  -3   2  -8   26.12    1.05
  -4   2  -8   16.48    0.93
  -4   2  -8   18.42    1.07
  -5   2  -8    0.25    0.52
  -5   2  -8    0.28    0.39
  -6   2  -8   28.21    1.37
  -6   2  -8   28.40    1.33
  -7   2  -8    2.94    0.70
  -7   2  -8    3.80    0.73
  -8   2  -8   26.13    1.54
  -8   2  -8   25.59    1.47
  -9   2  -8    4.79    0.99
  -9   2  -8    5.37    0.90
 -10   2  -8   42.34    2.13
 -10   2  -8   39.40    1.93
 -11   2  -8    4.79    1.19
 -11   2  -8    5.01    0.97
 -12   2  -8   13.06    1.57
 -13   2  -8   11.95    1.60
 -14   2  -8    8.42    1.55
 -14  -1   8    5.17    1.39
 -13  -1   8   -0.89    1.14
 -13  -1   8    0.70    1.13
 -12  -1   8    4.07    1.16
 -12  -1   8    4.52    1.21
 -11  -1   8    0.00    1.00
 -11  -1   8   -0.04    0.92
 -10  -1   8    1.33    0.96
 -10  -1   8   -0.10    0.88
  -9  -1   8   15.28    1.29
  -9  -1   8   15.13    1.19
  -8  -1   8   14.77    1.36
  -8  -1   8   14.94    1.28
  -7  -1   8   28.85    1.35
  -7  -1   8   23.84    1.44
   6   1  -8    9.21    0.69
  -6  -1   8   11.31    0.94
  -6  -1   8    9.69    0.85
   5   1  -8   52.86    1.64
  -5  -1   8   54.92    1.73
  -5  -1   8   56.36    1.87
   4   1  -8   41.91    1.39
  -4  -1   8   40.64    1.36
  -4  -1   8   42.70    1.54
  -3  -1   8    5.45    0.47
  -3  -1   8    5.20    0.64
   2   1  -8    4.51    0.58
  -2  -1   8    6.08    0.56
  -2  -1   8    6.47    0.67
   1   1  -8  149.45    3.84
  -1  -1   8  150.00    3.71
  -1  -1   8  141.65    3.60
   0   1  -8    4.27    0.57
   0  -1   8    4.03    0.58
  -1   1  -8   16.05    0.97
   1  -1   8   15.53    0.96
  -2   1  -8    1.21    0.52
  -3   1  -8  106.16    2.98
  -3   1  -8  104.82    2.82
  -4   1  -8   19.33    1.09
  -5   1  -8    1.84    0.50
  -5   1  -8    1.65    0.55
  -6   1  -8   26.57    1.29
  -6   1  -8   25.19    1.31
  -7   1  -8    1.91    0.65
  -7   1  -8    2.62    0.64
  -8   1  -8    0.49    0.61
  -8   1  -8   -0.12    0.71
  -9   1  -8    5.64    1.00
  -9   1  -8    6.65    0.88
 -10   1  -8    1.85    1.00
 -10   1  -8    0.85    0.78
 -11   1  -8    1.18    1.08
 -11   1  -8    1.63    0.84
 -12   1  -8   14.88    1.55
 -13   1  -8   10.42    1.56
 -14   1  -8   -0.47    1.30
 -14   0   8    1.22    1.25
 -14   0   8    0.38    1.26
 -13   0   8   -2.07    1.07
 -13   0   8   -0.62    1.19
 -12   0   8   18.00    1.54
 -12   0   8   17.81    1.62
 -11   0   8    1.52    1.01
 -11   0   8    0.67    0.95
 -10   0   8   14.64    1.35
 -10   0   8   14.90    1.31
  -9   0   8    3.40    0.89
  -9   0   8    3.66    0.96
  -8   0   8    6.35    0.90
  -8   0   8    6.67    0.83
  -7   0   8   -0.80    0.54
  -7   0   8    0.47    0.63
   6   0  -8    4.81    0.46
  -6   0   8    5.24    0.63
  -6   0   8    4.55    0.70
   5   0  -8   37.28    1.27
  -5   0   8   38.59    1.38
  -5   0   8   40.22    1.50
   4   0  -8  103.16    2.80
  -4   0   8  104.16    2.86
  -4   0   8  109.53    2.84
   3   0  -8  154.06    3.94
  -3   0   8  155.08    3.89
  -3   0   8  152.88    3.86
   2   0  -8   29.65    1.17
  -2   0   8   30.69    1.22
   1   0  -8    3.40    0.51
  -1   0   8    3.79    0.55
  -1   0   8    3.99    0.38
   0   0  -8    3.58    0.50
   0   0   8    2.85    0.48
  -1   0  -8   -0.61    0.40
   1   0   8    0.18    0.43
  -2   0  -8    5.67    0.63
  -3   0  -8  122.61    3.35
  -4   0  -8    2.91    0.57
  -4   0  -8    2.40    0.53
  -5   0  -8    0.44    0.50
  -5   0  -8   -0.46    0.46
  -6   0  -8   20.93    1.14
  -6   0  -8   20.44    1.14
  -7   0  -8    6.31    0.77
  -7   0  -8    4.68    0.68
  -8   0  -8    6.16    0.83
  -8   0  -8    6.65    0.80
  -9   0  -8    1.31    0.68
  -9   0  -8    0.80    0.83
 -10   0  -8   34.14    1.66
 -10   0  -8   32.23    1.92
 -11   0  -8    8.50    0.98
 -11   0  -8    8.14    1.24
 -12   0  -8    0.34    1.08
 -13   0  -8   14.20    1.60
 -14   0  -8   17.94    1.83
 -14   1   8    7.84    1.47
 -14   1   8   13.22    1.58
 -13   1   8    3.34    1.25
 -13   1   8    1.23    1.22
 -12   1   8   -0.45    1.05
 -12   1   8    0.06    1.01
 -11   1   8   13.06    1.32
 -11   1   8   12.77    1.33
 -10   1   8  126.20    3.87
 -10   1   8  125.65    3.77
  -9   1   8   57.93    2.28
  -9   1   8   61.24    2.27
  -8   1   8    0.05    0.69
  -8   1   8    0.13    0.65
  -7   1   8   10.81    1.04
  -7   1   8   13.58    1.11
   6  -1  -8   25.82    0.97
  -6   1   8   28.16    1.26
  -6   1   8   29.15    1.34
   5  -1  -8   95.11    2.64
  -5   1   8   99.95    2.76
  -5   1   8  106.48    2.81
   4  -1  -8    2.40    0.44
  -4   1   8    2.79    0.57
   3  -1  -8   18.38    0.92
  -3   1   8   19.63    1.00
  -3   1   8   17.73    0.88
   2  -1  -8   88.95    2.58
  -2   1   8   94.84    2.48
  -2   1   8   94.41    2.46
   1  -1  -8    6.81    0.59
  -1   1   8    6.89    0.56
  -1   1   8    8.49    0.72
   0  -1  -8   24.64    1.03
   0   1   8   23.42    0.99
  -1  -1  -8   86.92    2.43
   1   1   8   84.77    2.28
  -2  -1  -8  188.52    4.81
  -3  -1  -8   84.51    2.46
  -4  -1  -8    0.76    0.51
  -5  -1  -8   15.22    0.99
  -5  -1  -8   15.80    0.99
  -6  -1  -8    1.40    0.56
  -6  -1  -8    0.39    0.51
  -7  -1  -8    5.54    0.73
  -7  -1  -8    5.52    0.68
  -8  -1  -8    0.13    0.64
  -8  -1  -8   -0.09    0.55
  -9  -1  -8    4.45    0.74
  -9  -1  -8    4.97    0.90
 -10  -1  -8    0.48    0.89
 -10  -1  -8    1.82    0.70
 -11  -1  -8   -0.33    0.69
 -11  -1  -8   -0.39    0.97
 -12  -1  -8    5.47    1.24
 -13  -1  -8   40.27    2.41
 -14  -1  -8    2.72    1.40
 -14   2   8    0.83    1.25
 -14   2   8    1.13    1.28
[truncated: 1,066,371 more chars]
